# Supplementary material for: Terphenyl-Based Small-Molecule Inhibitors of Programmed Cell Death-1/Programmed Death-Ligand 1 Protein–Protein Interaction
Source: PubMed Central journal article supplement (PMC8365601; doi:10.1021/acs.jmedchem.1c00957), 2021-07-27
Supplement: jm1c00957_si_001.pdf [file jm1c00957_si_001.pdf]

---

## Supporting Information

# Terphenyl-based Small-Molecule Inhibitors of Programmed Cell Death-1/Programmed Death-Ligand 1 Protein–Protein Interaction

Damian Muszak<sup>1</sup>, Ewa Surmiak<sup>1,\*</sup>, Jacek Plewka<sup>2</sup>, Katarzyna Magiera-Mularz<sup>1</sup>, Justyna Kocik-Krol<sup>1</sup>, Bogdan Musielak<sup>1</sup>, Dominik Sala<sup>1</sup>, Radoslaw Kitel<sup>1</sup>, Malgorzata Stec<sup>3</sup>, Kazimierz Weglarczyk<sup>3</sup>, Maciej Siedlar<sup>3</sup>, Alexander Dömling<sup>4</sup>, Lukasz Skalniak<sup>1</sup>, Tad A. Holak<sup>1,\*</sup>

<sup>1</sup>Department of Organic Chemistry, Faculty of Chemistry, Jagiellonian University, Gronostajowa 2, 30-387 Krakow, Poland

<sup>2</sup>Malopolska Centre of Biotechnology, Jagiellonian University, Gronostajowa 7a, 30-387 Kraków, Poland

<sup>3</sup>Department of Clinical Immunology, Institute of Pediatrics, Jagiellonian University Medical College, Wielicka 265, 30-663 Krakow, Poland

<sup>4</sup>University of Groningen, Department of Drug Design, A. Deusinglaan 1, 9713 AV Groningen, The Netherlands

\*corresponding author: [ewa.surmiak@uj.edu.pl](mailto:ewa.surmiak@uj.edu.pl); [tadholak@uj.edu.pl](mailto:tadholak@uj.edu.pl)

## CONTENT

|                                                                                            |     |
|--------------------------------------------------------------------------------------------|-----|
| 1. PREPARATION OF PHENYLBORONIC ACID PINACOL ESTERS .....                                  | 2   |
| 2. SUPPORTING FIGURES AND TABLES .....                                                     | 13  |
| Table S1. Structures and HTRF data for obtained compounds .....                            | 13  |
| Table S2. Data collection and refinement statistics (molecular replacement).....           | 18  |
| Figure S1. Results of the Immune Checkpoint Blockade (ICB) assay .....                     | 19  |
| Figure S2. Comparison of the terphenyl-based with biphenyl-based inhibitor structures..... | 23  |
| 3. COPIES OF NMR SPECTRA .....                                                             | 24  |
| 4. COPIES OF LCMS OF FINAL COMPOUNDS .....                                                 | 104 |
| 6. REFERENCES .....                                                                        | 116 |

## 1. PREPARATION OF PHENYLBORONIC ACID PINACOL ESTERS

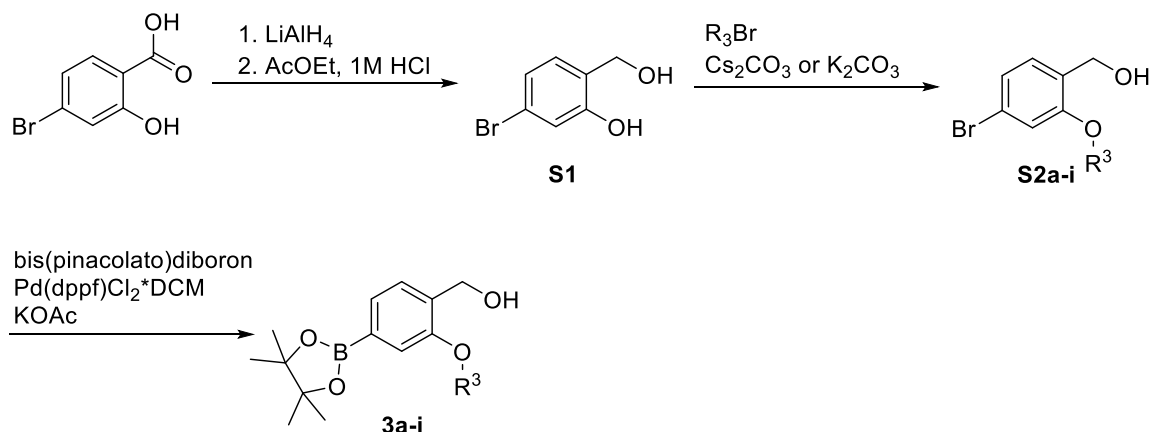

### 1.1. Preparation of 4-bromo-2-hydroxymethylbenzyl alcohol (**S1**):

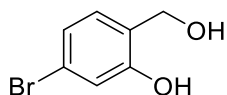

$\text{LiAlH}_4$  (2.28 g, 60.0. mmol, 4.0 equiv) in anhydrous diethyl ether was placed in a round-bottom flask and cooled down in ice bath. Then 4-bromo-2-hydroxybenzoic acid (3.26 g, 15.0 mmol, 1 equiv) dissolved in anhydrous diethyl ether was added dropwise to this mixture. The reaction was stirred at RT overnight, after this time it was quenched with ethyl acetate/water and then acidified with 1 M HCl, followed by extraction with ethyl acetate. Organic phases were combined, dried over anhydrous  $\text{MgSO}_4$  and evaporated. The crude product was purified by flash chromatography ( $\text{SiO}_2$ , hexane/ethyl acetate 1:2) giving final product **S1** with 73.9% (2.25 g) yield. Compound **S1** was previously described in a patent application.<sup>1</sup>

$R_f = 0.53$  ( $\text{SiO}_2$ , hexane/ethyl acetate 1:2);  $^1\text{H NMR}$  (600 MHz,  $\text{DMSO-d}_6$ )  $\delta$  [ppm]: 9.85 (s, 1H), 7.24 (d,  $J = 8.1$  Hz, 1H), 6.97 (dd,  $J = 8.0, 2.0$  Hz, 1H), 6.94 (d,  $J = 1.9$  Hz, 1H), 4.44 (s, 2H);  $^{13}\text{C NMR}$  (151 MHz,  $\text{DMSO-d}_6$ )  $\delta$  [ppm]: 155.7, 129.4, 128.8, 121.9, 119.8, 117.5, 58.2; **IR (ATR)** [ $\text{cm}^{-1}$ ]: 3419, 3142, 2360, 1588, 1405, 1256; **LC-MS (DAD/ESI)**:  $t_R = 4.11$  min, calcd for  $\text{C}_7\text{H}_7\text{Br}$  ( $m/z$ ):  $[\text{M-H}]^-$  200.96, found:  $[\text{M-H}]^-$  200.90.

### 1.2. General procedure for Williamson alkylation leading to alkoxy intermediates **S2a-i**:

5-Bromo-2-(hydroxymethyl)phenol (**S1**), appropriate alkyl halide,  $\text{Cs}_2\text{CO}_3$  or  $\text{K}_2\text{CO}_3$  and anhydrous DMF were placed in a round-bottom flask. The reaction mixture was heated at  $85^\circ\text{C}$  for 16 h. When it was completed water was added and extraction with ethyl acetate follows. Organic phases were combined, dried over anhydrous  $\text{MgSO}_4$  and evaporated. Crude products

were purified by flash chromatography (SiO<sub>2</sub>, hexane/ethyl acetate) giving final products **S1a-i** with 91-43% yield.

#### (4-Bromo-2-methoxyphenyl)methanol (**S2a**)

Compound **S2a** was purchased from Sigma-Aldrich.

#### (4-Bromo-2-ethoxyphenyl)methanol (**S2b**)

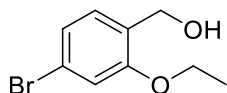

5-Bromo-2-(hydroxymethyl)phenol (**S1**) (0.50 g, 2.46 mmol, 1.0 equiv), bromoethane (0.82 ml, 2.71 mmol, 1.1 equiv), Cs<sub>2</sub>CO<sub>3</sub> (1.20 g, 3.69 mmol, 1.5 equiv). Product **S2b** was obtained as colourless solid with 91.0% (0.52 g) yield. Compound **S2b** was previously characterized in patent application.<sup>2</sup>

**R<sub>f</sub>** = 0.46 (SiO<sub>2</sub>, hexane/ethyl acetate 1:1); **<sup>1</sup>H NMR** (600 MHz, CDCl<sub>3</sub>)  $\delta$  [ppm]: 7.07 (d, *J* = 7.9 Hz, 1H), 6.99 (dd, *J* = 8.0, 1.7 Hz, 1H), 6.92 (d, *J* = 1.6 Hz, 1H), 4.56 (s, 2H), 4.00 (q, *J* = 7.0 Hz, 2H), 2.13 (s<sub>broad</sub>, 1H), 1.37 (t, *J* = 7.0 Hz, 3H); **<sup>13</sup>C NMR** (151 MHz, CDCl<sub>3</sub>)  $\delta$  [ppm]: 157.3, 129.7, 128.3, 123.5, 121.9, 114.7, 64.0, 61.6, 14.8; **IR (ATR)** [cm<sup>-1</sup>]: 3486, 2985, 1414, 1351, 1242, 1145; **LC-MS (DAD/ESI)**: t<sub>R</sub> = 5.96 min, calcd for C<sub>9</sub>H<sub>11</sub>BrO<sub>2</sub> (*m/z*): [M-H<sub>2</sub>O+H]<sup>+</sup> 213.00, found: [M-H<sub>2</sub>O+H]<sup>+</sup> 212.99; **HRMS (ESI)**: Calcd for C<sub>9</sub>H<sub>11</sub>BrO<sub>2</sub> (*m/z*): [M+Na]<sup>+</sup> 252.9835, found: [M+Na]<sup>+</sup> 252.9835

#### (4-Bromo-2-isopropoxyphenyl)methanol (**S2c**)

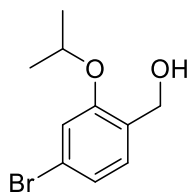

5-Bromo-2-(hydroxymethyl)phenol (**S1**) (0.69 g, 3.40 mmol, 1.0 equiv), 2-bromopropane (0.64 ml, 6.80 mmol, 2.0 equiv), Cs<sub>2</sub>CO<sub>3</sub> (2.21 g, 6.80 mmol, 2.0 equiv). Product **S2c** was obtained as light yellow oil with 62.0% (0.52 g) yield. Compound **S2c** was previously described in literature.<sup>3</sup>

**R<sub>f</sub>** = 0.24 (SiO<sub>2</sub>, hexane/ethyl acetate 4:1); **<sup>1</sup>H NMR** (600 MHz, CDCl<sub>3</sub>)  $\delta$  [ppm]: 7.14 (d, *J* = 8.0 Hz, 1H), 7.05 (dd, *J* = 8.0, 1.8 Hz, 1H), 7.01 (d, *J* = 1.7 Hz, 1H), 4.61 (s, 2H), 4.60-4.56 (m, 1H), 1.37 (d, *J* = 6.1 Hz, 6H); **<sup>13</sup>C NMR** (151 MHz, CDCl<sub>3</sub>)  $\delta$  [ppm]: 156.5, 130.0, 129.2, 123.5, 12.0, 116.1, 70.9, 62.0, 22.2; **IR (ATR)** [cm<sup>-1</sup>]: 3343, 2977, 2930, 1592, 1484, 1402, 1238, 1122, 1109,

1042, 960, 879; **LC-MS (DAD/ESI)**:  $t_r = 6.48$  min, calcd for  $C_{10}H_{13}BrO_2$  ( $m/z$ ):  $[M-H_2O+H]^+$  227.01, found:  $[M-H_2O+H]^+$  227.02; **HRMS (ESI)**: Calcd for  $C_{10}H_{13}BrO_2$  ( $m/z$ ):  $[M+Na]^+$  266.9991, found:  $[M+Na]^+$  266.9991

#### (4-Bromo-2-isopentyloxyphenyl)methanol (**S2d**)

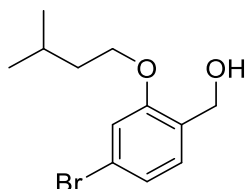

5-Bromo-2-(hydroxymethyl)phenol (**S1**) (0.43 g, 2.12 mmol, 1.0 equiv), 1-bromo-3-methylbutane (0.51 ml, 4.24 mmol, 2.0 equiv),  $CS_2CO_3$  (1.38 g, 4.24 mmol, 2.0 equiv). Product **S2d** was obtained as yellow oil with 51.6% (0.30 g) yield.

$R_f = 0.29$  ( $SiO_2$ , hexane/ethyl acetate 4:1);  **$^1H$  NMR** (600 MHz,  $CDCl_3$ )  $\delta$  [ppm]: 7.15 (d,  $J = 8.0$  Hz, 1H), 7.07 (dd,  $J = 7.9, 1.8$  Hz, 1H), 7.01 (d,  $J = 1.8$  Hz, 1H), 4.63 (s, 2H), 4.02 (t,  $J = 6.6$  Hz, 2H), 1.87-1.77 (m, 1H), 1.71 (q,  $J = 6.7$  Hz, 2H), 0.98 (d,  $J = 6.6$  Hz, 6H);  **$^{13}C$  NMR** (151 MHz,  $CDCl_3$ )  $\delta$  [ppm]: 157.5, 129.7, 128.3, 123.5, 122.0, 114.6, 66.8, 61.8, 37.8, 25.2, 22.5; **IR (ATR)** [ $cm^{-1}$ ]: 3335, 2956, 2931, 2871, 1593, 1490, 1404, 1386, 1241, 1044, 1016, 835, 806; **LC-MS (DAD/ESI)**:  $t_r = 7.88$  min, calcd for  $C_{12}H_{17}BrO_2$  ( $m/z$ ):  $[M-H_2O+H]^+$  255.04, found:  $[M-H_2O+H]^+$  255.13; **HRMS (ESI)**: Calcd for  $C_{12}H_{17}BrO_2$  ( $m/z$ ):  $[M+Na]^+$  295.0304, found:  $[M+Na]^+$  295.0305

#### 2-(5-Bromo-2-(hydroxymethyl)phenoxy)acetonitrile (**S2e**)

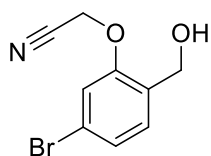

5-Bromo-2-(hydroxymethyl)phenol (**S1**) (0.50 g, 2.46 mmol, 1.0 equiv), bromoacetonitrile (0.34 ml, 4.92 mmol, 2.0 equiv),  $CS_2CO_3$  (0.68 g, 4.92 mmol, 2.0 equiv). Product **S2e** was obtained as light yellow solid with 42.7% (0.25 g) yield.

$R_f = 0.32$  ( $SiO_2$ , hexane/ethyl acetate 4:1);  **$^1H$  NMR** (600 MHz,  $CDCl_3$ )  $\delta$  [ppm]: 7.31 (d,  $J = 8.1$  Hz, 1H), 7.25 (dd,  $J = 8.1, 1.6$  Hz, 1H), 7.08 (d,  $J = 1.7$  Hz, 1H), 4.82 (s, 2H), 4.67 (s, 2H);  **$^{13}C$  NMR** (151 MHz,  $CDCl_3$ )  $\delta$  [ppm]: 154.6, 130.5, 129.5, 126.5, 122.0, 115.5, 114.6, 60.3, 54.1; **IR (ATR)** [ $cm^{-1}$ ]: 372, 3109, 3074, 2983, 2927, 2876, 2071, 1597, 1487, 1409, 1222, 1049, 851; **LC-MS (DAD/ESI)**:  $t_r = 4.72$  min, calcd for  $C_9H_8BrNO_2$  ( $m/z$ ):  $[M-H_2O+H]^+$  223.97, found:  $[M-$

H<sub>2</sub>O+H]<sup>+</sup> 224.03; **HRMS (ESI)**: Calcd for C<sub>9</sub>H<sub>8</sub>BrNO<sub>2</sub> (*m/z*): [M+Na]<sup>+</sup> 263.9631, found: [M+Na]<sup>+</sup> 263.9633

#### (4-Bromo-2-(cyclobutylmethoxy))methanol (**S2f**)

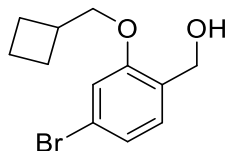

5-Bromo-2-(hydroxymethyl)phenol (**S1**) (1.00 g, 4.90 mmol, 1.0 equiv), (bromomethyl)cyclobutane (1.10 ml, 9.80 mmol, 2.0 equiv), K<sub>2</sub>CO<sub>3</sub> (1.35 g, 9.80 mmol, 2.0 equiv). Product **S2f** was obtained as light yellow oil with 59.4% (0.79 g) yield.

**R<sub>f</sub>** = 0.32 (SiO<sub>2</sub>, hexane/ethyl acetate 4:1); **<sup>1</sup>H NMR** (600 MHz, CDCl<sub>3</sub>) δ [ppm]: 7.14 (d, *J* = 8.0, 1H), 7.07 (dd, *J* = 7.9, 1.8 Hz, 1H), 7.00 (d, *J* = 1.8 Hz, 1H), 4.63 (s, 2H), 3.96 (d, *J* = 6.6 Hz, 2H), 2.83-2.75 (m, 1H), 2.18-2.12 (m, 2H), 2.04-1.92 (m, 2H), 1.90-1.83 (m, 2H); **<sup>13</sup>C NMR** (151 MHz, CDCl<sub>3</sub>) δ [ppm]: 157.7, 129.8, 128.5, 123.6, 122.1, 114.9, 72.4, 61.8, 34.5, 24.9, 18.7; **IR (ATR)** [cm<sup>-1</sup>]: 3323, 2975, 2935, 2864, 1593, 1488, 1403, 1237, 1045, 1013, 873; **LC-MS (DAD/ESI)**: *t<sub>r</sub>* = 7.59 min, calcd for C<sub>12</sub>H<sub>15</sub>BrN<sub>2</sub> (*m/z*): [M-H<sub>2</sub>O+H]<sup>+</sup> 253.07, found: [M-H<sub>2</sub>O+H]<sup>+</sup> 253.02; **HRMS (ESI)**: Calcd for C<sub>12</sub>H<sub>15</sub>BrO<sub>2</sub> (*m/z*): [M+Na]<sup>+</sup> 293.0148, found: [M+Na]<sup>+</sup> 293.0148

#### (4-Bromo-2-(cyclopentylmethoxy))methanol (**S2g**)

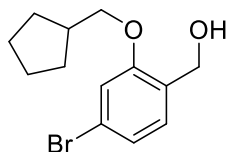

5-Bromo-2-(hydroxymethyl)phenol (**S1**) (0.62 g, 3.07 mmol, 1.0 equiv), (bromomethyl)cyclopentane (0.55 ml, 4.29 mmol, 1.4 equiv), Cs<sub>2</sub>CO<sub>3</sub> (2.00 g, 6.13 mmol, 2.0 equiv). Product **S2g** was obtained as light yellow oil with 62.8% (0.55 g) yield.

**R<sub>f</sub>** = 0.32 (SiO<sub>2</sub>, hexane/ethyl acetate 4:1); **<sup>1</sup>H NMR** (600 MHz, CDCl<sub>3</sub>) δ [ppm]: 7.14 (d, *J* = 7.9 Hz, 1H), 7.07 (dd, *J* = 7.9, 1.8 Hz, 1H), 7.00 (d, *J* = 1.8 Hz, 1H), 4.64 (s, 2H), 3.88 (d, *J* = 6.9 Hz, 2H), 2.44-2.33 (m, 1H), 1.90-1.83 (m, 2H), 1.69-1.56 (m, 4H), 1.39-1.32 (m, 2H); **<sup>13</sup>C NMR** (151 MHz, CDCl<sub>3</sub>) δ [ppm]: 157.7, 129.8, 128.4, 123.6, 122.1, 114.8, 72.7, 61.9, 39.1, 29.6, 25.6; **IR (ATR)** [cm<sup>-1</sup>]: 3335, 2952, 2866, 1593, 1489, 1404, 1238, 1028, 875; **LC-MS (DAD/ESI)**: *t<sub>r</sub>* = 8.14 min, calcd for C<sub>13</sub>H<sub>17</sub>BrO<sub>2</sub> (*m/z*): [M-H<sub>2</sub>O+H]<sup>+</sup> 267.04, found: [M-H<sub>2</sub>O+H]<sup>+</sup> 267.16; **HRMS (ESI)**: Calcd for C<sub>13</sub>H<sub>17</sub>BrO<sub>2</sub> (*m/z*): [M+Na]<sup>+</sup> 307.0304, found: [M+Na]<sup>+</sup> 307.0305

### 3'-((5-bromo-2-(hydroxymethyl)phenoxy)methyl)-[1,1'-biphenyl]-3-carbonitrile (**S2h**)

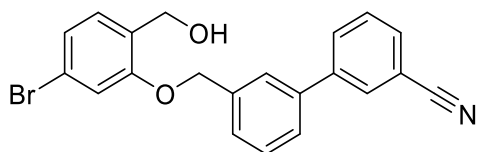

5-Bromo-2-(hydroxymethyl)phenol (**S1**) (0.45 g, 2.2 mmol, 1.0 equiv), 3'-(chloromethyl)-[1,1'-biphenyl]-3-carbonitrile (0.51 g, 2.2 mmol, 1.0 equiv), Cs<sub>2</sub>CO<sub>3</sub> (1.43 g, 4.4 mmol, 2 equiv). Product **S2h** was obtained as light-yellow oil with 44.4% (0.38 g) yield.

R<sub>f</sub> = 0.48 (SiO<sub>2</sub>, hexane/ethyl acetate 1:1); **<sup>1</sup>H NMR** (600 MHz, CDCl<sub>3</sub>) δ [ppm]: 7.84 (t, *J* = 1.5 Hz, 1H), 7.80 (m, 1H), 7.62 (dt, *J* = 7.7, 1.3 Hz, 1H), 7.59 (s<sub>broad</sub>, 1H), 7.55-7.49 (m, 3H), 7.45 (d, *J* = 7.3 Hz, 1H), 7.20 (d, *J* = 8.4 Hz, 1H), 7.11-7.09 (m, 2H), 5.12 (s, 2H), 4.68 (s, 2H), 2.34 (s, 1H); **<sup>13</sup>C NMR** (151 MHz, CDCl<sub>3</sub>) δ [ppm]: 156.8, 141.9, 139.5, 137.2, 131.6, 131.0, 130.7, 129.8, 129.8, 129.7, 128.7, 127.4, 127.1, 126.1, 124.2, 121.9, 118.8, 115.2, 113.0, 70.2, 61.0; **IR (ATR)** [cm<sup>-1</sup>]: 3273, 3059, 2920, 2231, 1592, 1491, 1243, 1053, 774; **LC-MS (DAD/ESI)**: t<sub>r</sub> = 7.83 min, calcd for C<sub>21</sub>H<sub>16</sub>BrNO<sub>2</sub> (*m/z*): [M-H<sub>2</sub>O+H]<sup>+</sup> 376.04, found: [M-H<sub>2</sub>O+H]<sup>+</sup> 376.15; **HRMS (ESI)**: Calcd for C<sub>21</sub>H<sub>16</sub>BrNO<sub>2</sub> (*m/z*): [M+Na]<sup>+</sup> 416.0257, found: [M+Na]<sup>+</sup> 416.0255

### 3'-((5-Bromo-2-(hydroxymethyl)phenoxy)methyl)benzonitrile (**S2i**)

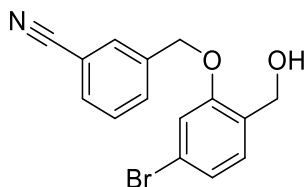

5-Bromo-2-(hydroxymethyl)phenol (**S1**) (1.0 g, 5.0 mmol, 1.0 equiv), 3-cyanobenzyl bromide (1.15 g, 5.9 mmol, 1.2 equiv), K<sub>2</sub>CO<sub>3</sub> (1.03 g, 1.03 mmol, 1.5 equiv) Product **S2i** was obtained as colourless solid with 68.4% (1.09 g) yield. The product was recrystallized from cyclohexane/ethyl acetate mixture.

R<sub>f</sub> = 0.64 (SiO<sub>2</sub>, hexane/ethyl acetate 1:1); **<sup>1</sup>H NMR** (600 MHz, DMSO-d<sub>6</sub>) δ [ppm]: 7.91 (s, 1H), 7.81 (d, *J* = 12.3, 7.9 Hz, 1H), 7.63 (t, *J* = 7.8 Hz, 1H), 7.34 (d, *J* = 8.0 Hz, 1H), 7.23 (d, *J* = 1.7 Hz, 1H), 7.17 (dd, *J* = 8.0, 1.7 Hz, 1H), 5.22 (s, 2H), 5.14 (t, *J* = 5.6 Hz, 1H), 4.51 (d, 5.6 Hz, 2H); **<sup>13</sup>C NMR** (151 MHz, DMSO-d<sub>6</sub>) δ [ppm]: 155.5, 138.6, 132.1, 131.7, 130.7, 130.4, 129.8, 128.8, 123.4, 119.9, 118.7, 114.7, 111.5, 68.3; **IR (ATR)** [cm<sup>-1</sup>]: 3288, 2922, 2230, 1594, 1489, 1400, 1054; **LC-MS (DAD/ESI)**: t<sub>r</sub> = 6.56 min, calcd for C<sub>15</sub>H<sub>12</sub>BrNO<sub>2</sub> (*m/z*): [M-H<sub>2</sub>O+H]<sup>+</sup> 300.00, found: [M-H<sub>2</sub>O+H]<sup>+</sup> 300.06; **HRMS (ESI)**: Calcd for C<sub>15</sub>H<sub>12</sub>BrNO<sub>2</sub> (*m/z*): [M+Na]<sup>+</sup> 339.9944, found: [M+Na]<sup>+</sup> 339.9941.

### 1.3. General procedure for Miyaura borylation (3a-i)

Bis(pinacolato)diboron, anhydrous potassium acetate, appropriate bromoaryl **S2a-i**, and anhydrous dioxane were placed in a two-neck round-bottom flask under argon atmosphere. The mixture was deoxygenated by rinsing with argon for half an hour, then Pd(dppf)Cl<sub>2</sub> dichloromethane complex was added. The reaction mixture was heated at 80°C, using a preheated bath, for three hours and after this time the progression of reaction was controlled using TLC analysis (SiO<sub>2</sub>, hexane/ethyl acetate, 4:1). If the conversion was completed water was added and extraction with ethyl acetate followed. Organic phases were combined, dried over anhydrous MgSO<sub>4</sub> and evaporated. Crude products were purified by column chromatography (SiO<sub>2</sub>, hexane/ethyl acetate) giving final boranes **3a-i** with 64.0-99.0% yield.

#### (2-Methoxy-4-(4,4,5,5-tetramethyl-1,3,2-dioxaborolan-2-yl)phenyl)methanol (**3a**)

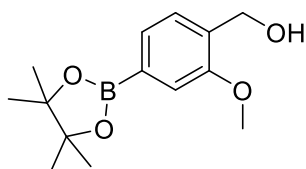

(4-Bromo-2-methoxyphenyl)methanol (**S2a**) (2.17 g, 10.0 mmol, 1.0 equiv), bis(pinacolato)diboran (2.79 g, 11.0 mmol, 1.1 equiv), anhydrous potassium acetate (2.94 g, 30.0 mmol, 3.0 equiv), Pd(dppf)Cl<sub>2</sub> complex with dichloromethane (0.41 g, 0.5 mmol, 0.05 equiv). Product **3a** was obtained as colourless solid with quantitative (2.61 g) yield. Product **3a** was crystallized from a cyclohexane/ethyl acetate mixture. The compound was previously described in the literature.<sup>4</sup>

$R_f$  = 0.46 (SiO<sub>2</sub>, hexane/ethyl acetate 1:1); <sup>1</sup>H NMR (600 MHz, CDCl<sub>3</sub>)  $\delta$  [ppm]: 7.42 (d,  $J$  = 7.3 Hz, 1H), 7.30-7.28 (m, 2H), 4.70 (s, 2H), 3.91 (s, 4H), 1.35 (s, 12H); <sup>13</sup>C NMR (151 MHz, CDCl<sub>3</sub>)  $\delta$  [ppm]: 157.0, 132.4, 128.1, 127.7, 115.7, 84.0, 62.3, 55.5, 25.0; IR (ATR) [cm<sup>-1</sup>]: 3287, 2979, 1402, 1353; HRMS (ESI): Calcd for C<sub>14</sub>H<sub>21</sub>BO<sub>4</sub> ( $m/z$ ): [M+Na]<sup>+</sup> 287.1425, found: [M+Na]<sup>+</sup> 287.1429

#### (2-Ethoxy-4-(4,4,5,5-tetramethyl-1,3,2-dioxaborolan-2-yl)phenyl)methanol (**3b**)

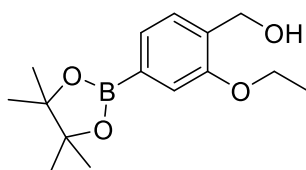

(4-Bromo-2-ethoxyphenyl)methanol (**S2b**) (0.42 g, 1.81 mmol, 1.0 equiv), bis(pinacolato)diboran (0.55 g, 2.17 mmol, 1.2 equiv), anhydrous potassium acetate (0.53 g,

5.43 mmol, 3.0 equiv), Pd(dppf)Cl<sub>2</sub> complex with dichloromethane (0.07 g, 0.09 mmol, 0.05 equiv). Product **3b** was obtained as colourless oil with 81.0% (0.41 g) yield. Compounds was previously described in patent application.<sup>5</sup>

**R<sub>f</sub>** = 0.46 (SiO<sub>2</sub>, hexane/ethyl acetate 1:1); **<sup>1</sup>H NMR** (600 MHz, CDCl<sub>3</sub>) δ [ppm]: 7.39 (m, 1H), 7.28 (m, 2H), 4.70 (s, 2H), 4.16 (q, *J* = 7.0 Hz, 2H), 2.44 (s<sub>broad</sub>, 1H), 1.44 (t, *J* = 7.0 Hz, 3H), 1.34 (s, 12H); **<sup>13</sup>C NMR** (151 MHz, CDCl<sub>3</sub>) δ [ppm]: 156.4, 132.3, 128.0, 127.5, 116.6, 83.9, 63.6, 62.6, 24.9, 15.0; **IR (ATR)** [cm<sup>-1</sup>]: 3486, 2985, 1414, 1351, 1242, 1145; **HRMS (ESI)**: Calcd for C<sub>15</sub>H<sub>23</sub>BO<sub>4</sub> (*m/z*): [M+Na]<sup>+</sup> 301.1582, found: [M+Na]<sup>+</sup> 301.1582

### (2-Isopropoxy-4-(4,4,5,5-tetramethyl-1,3,2-dioxaborolan-2-yl)phenyl)methanol (**3c**)

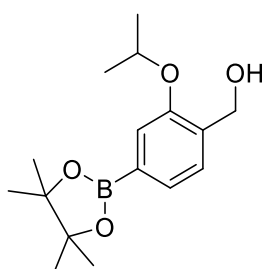

(4-Bromo-2-isopropoxyphenyl)methanol (**S2c**) (0.51 g, 2.10 mmol, 1.0 equiv), bis(pinacolato)diboran (0.59 g, 2.31 mmol, 1.1 equiv), anhydrous potassium acetate (0.62 g, 6.30 mmol, 3.0 equiv), Pd(dppf)Cl<sub>2</sub> complex with dichloromethane (0.05 g, 0.06 mmol, 0.03 equiv). Product **3c** was obtained as colourless oil with 64.0% (0.39 g) yield.

**R<sub>f</sub>** = 0.19 (SiO<sub>2</sub>, hexane/ethyl acetate 4:1); **<sup>1</sup>H NMR** (600 MHz, CDCl<sub>3</sub>) δ [ppm]: 7.30 (d, *J* = 7.3 Hz, 1H), 7.23 (s, 1H), 7.19 (d, *H* = 7.3 Hz, 1H), 4.67 (hept, *J* = 6.0 Hz, 1H), 4.60 (s, 2H), 1.29 (d, *J* = 6.1 Hz, 6H), 1.27 (s, 12H); **<sup>13</sup>C NMR** (151 MHz, CDCl<sub>3</sub>) δ [ppm]: 155.5, 133.4, 128.3, 127.5, 118.3, 84.0, 70.3, 62.8, 25.0, 22.4; **HRMS (ESI)**: Calcd for C<sub>16</sub>H<sub>25</sub>BO<sub>4</sub> (*m/z*): [M+Na]<sup>+</sup> 315.1738, found: [M+Na]<sup>+</sup> 315.1741

### (2-Isopentoxy-4-(4,4,5,5-tetramethyl-1,3,2-dioxaborolan-2-yl)phenyl)methanol (**3d**)

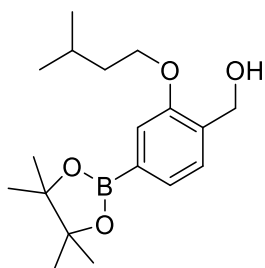

(4-Bromo-2-isopentoxyphenyl)methanol (**S2d**) (0.29 g, 1.09 mmol, 1.0 equiv), bis(pinacolato)diboran (0.30 g, 1.30 mmol, 1.1 equiv), anhydrous potassium acetate (0.32 g,



3.27 mmol, 3.0 equiv), Pd(dppf)Cl<sub>2</sub> complex with dichloromethane (0.03 g, 0.03 mmol, 0.03 equiv). Product **3d** was obtained as colourless oil with 68.4% (0.35 g) yield.

**R<sub>f</sub>** = 0.25 (SiO<sub>2</sub>, hexane/ethyl acetate 4:1); **<sup>1</sup>H NMR** (600 MHz, CDCl<sub>3</sub>) δ [ppm]: 7.40 (d, *J* = 7.3 Hz, 1H), 7.29-7.27 (m, 2H), 4.70 (s, 2H) 4.10 (t, *J* = 6.5 Hz, 2H), 1.84 (sept, *J* = 6.8 Hz, 1H), 1.71 (q, *J* = 6.6 Hz, 2H), 1.35 (s, 12H), 0.98 (d, *J* = 6.6 Hz, 6H); **<sup>13</sup>C NMR** (151 MHz, CDCl<sub>3</sub>) δ [ppm]: 156.6, 132.4, 128.0, 127.6, 116.5, 84.0, 66.5, 62.7, 38.3, 25.4, 25.0, 22.7; **IR (ATR)** [cm<sup>-1</sup>]: 3445, 2977, 2930, 1410, 1353, 1235, 1145; **HRMS (ESI)**: Calcd for C<sub>18</sub>H<sub>29</sub>BO<sub>4</sub> (*m/z*): [M+Na]<sup>+</sup> 343.2051, found: [M+Na]<sup>+</sup> 343.2052

### 2-(2-(Hydroxymethyl)-5-(4,4,5,5-tetramethyl-1,3,2-dioxaborolan-2-yl)phenoxy)acetonitrile (3e)

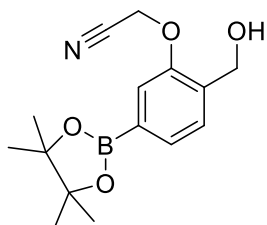

2-(5-Bromo-2-(hydroxymethyl)phenoxy)acetonitrile (**S2e**) (0.49 g, 2.04 mmol, 1.0 equiv), bis(pinacolato)diboran (0.57 g, 2.24 mmol, 1.1 equiv), anhydrous potassium acetate (0.60 g, 6.12 mmol, 3.0 equiv), Pd(dppf)Cl<sub>2</sub> complex with dichloromethane (0.05 g, 0.06 mmol, 0.03 equiv). Product **3e** was obtained as light-yellow solid with 96.6% (0.57 g) yield.

**R<sub>f</sub>** = 0.30 (SiO<sub>2</sub>, hexane/ethyl acetate 4:1); **<sup>1</sup>H NMR** (600 MHz, CDCl<sub>3</sub>) δ [ppm]: 7.56 (d, *J* = 7.3 Hz, 1H), 7.43 (d, *J* = 7.3 Hz, 1H), 7.31 (s, 1H), 4.88 (s, 2H), 4.75 (s, 2H), 1.35 (s, 12 H); **<sup>13</sup>C NMR** (151 MHz, CDCl<sub>3</sub>) δ [ppm]: 153.8, 133.4, 130.1, 128.7, 117.0, 115.2, 84.3, 61.0, 53.9, 25.0; **IR (ATR)** [cm<sup>-1</sup>]: 3320, 2983, 2937, 1410, 1351, 1237, 1143, 1050, 852; **HRMS (ESI)**: Calcd for C<sub>15</sub>H<sub>20</sub>BNO<sub>4</sub> (*m/z*): [M+Na]<sup>+</sup> 312.1378, found: [M+Na]<sup>+</sup> 312.1381.

### 2-(2-(Cyclobutylmethoxy)-4-(4,4,5,5-tetramethyl-1,3,2-dioxaborolan-2-yl)phenyl)methanol (3f)

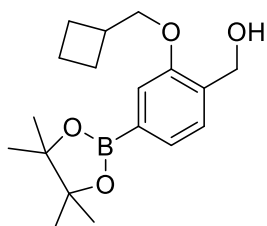

(4-Bromo-2-(cyclobutylmethoxy))methanol (**S2f**) (0.78 g, 2.9 mmol, 1.0 equiv), bis(pinacolato)diboran (0.81 g, 3.19 mmol, 1.1 equiv), anhydrous potassium acetate (0.85 g, 8.70 mmol, 3.0 equiv), Pd(dppf)Cl<sub>2</sub> complex with dichloromethane (0.07 g, 0.09 mmol, 0.03 equiv). Product **3f** was obtained as colourless oil with 71.6% (0.66 g) yield.

$R_f = 0.26$  (SiO<sub>2</sub>, hexane/ethyl acetate 4:1); **<sup>1</sup>H NMR** (600 MHz, CDCl<sub>3</sub>)  $\delta$  [ppm]: 7.40 (d,  $J = 7.4$  Hz, 1H), 7.28-7.26 (m, 2H), 4.70 (s, 2H), 4.06 (d,  $J = 6.6$  Hz, 2H), 2.84-2.76 (m, 1H), 2.19-2.11 (m, 2H), 2.03-1.84 (m, 4H), 1.35 (s, 12H); **<sup>13</sup>C NMR** (151 MHz, CDCl<sub>3</sub>)  $\delta$  [ppm]: 156.8, 132.5, 128.1, 127.6, 116.7, 84.0, 72.2, 62.8, 34.8, 29.8, 25.0, 25.0, 18.8; **IR (ATR)** [cm<sup>-1</sup>]: 3417, 2977, 2933, 2861, 1409, 1354, 1233, 1145, 855; **HRMS (ESI)**: Calcd for C<sub>18</sub>H<sub>27</sub>BO<sub>4</sub> ( $m/z$ ): [M+Na]<sup>+</sup> 341.1895, found: [M+Na]<sup>+</sup> 341.1899

**(2-(Cyclopentylmethoxy)-4-(4,4,5,5-tetramethyl-1,3,2-dioxaborolan-2-yl)phenyl)methanol (3g)**

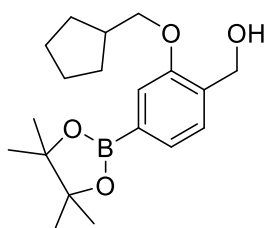

(4-Bromo-2-(cyclopentylmethoxy))methanol (**S2g**) (0.50 g, 1.75 mmol, 1.0 equiv), bis(pinacolato)diboran (0.49 g, 1.93 mmol, 1.1 equiv), anhydrous potassium acetate (0.52 g, 5.25 mmol, 3.0 equiv), Pd(dppf)Cl<sub>2</sub> complex with dichloromethane (0.04 g, 0.05 mmol, 0.03 equiv). Product **3g** was obtained as colourless oil with 97.5% (0.55 g) yield.

$R_f = 0.26$  (SiO<sub>2</sub>, hexane/ethyl acetate 4:1); **<sup>1</sup>H NMR** (600 MHz, CDCl<sub>3</sub>)  $\delta$  [ppm]: 7.39 (d,  $J = 7.3$  Hz, 1H), 7.28-7.25 (m, 2H), 4.70 (s, 2H), 3.96 (d,  $J = 6.9$  Hz, 2H), 2.41-2.36 (m, 1H), 1.89-1.82 (m, 2H), 1.68-1.58 (m, 4H), 1.39-1.35 (m, 2H), 1.34 (s, 12H); **<sup>13</sup>C NMR** (151 MHz, CDCl<sub>3</sub>)  $\delta$  [ppm]: 156.3, 132.4, 128.0, 127.6, 116.5, 84.0, 72.3, 62.8, 39.3, 29.7, 25.6, 25.0; **IR (ATR)** [cm<sup>-1</sup>]: 3435, 2956, 2866, 1410, 1354, 1238, 1146, 1051, 855; **HRMS (ESI)**: Calcd for C<sub>19</sub>H<sub>29</sub>BO<sub>4</sub> ( $m/z$ ): [M+Na]<sup>+</sup> 355.2051, found: [M+Na]<sup>+</sup> 355.2053

**3'-((2-(Hydroxymethyl)-5-(4,4,5,5-tetramethyl-1,3,2-dioxaborolan-2-yl)phenoxy)methyl)-[1,1'-biphenyl]-3-carbonitrile (3h)**

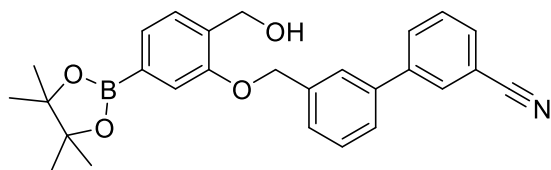

3'-((5-Bromo-2-(hydroxymethyl)phenoxy)methyl)-[1,1'-biphenyl]-3-carbonitrile (**S2h**) (0.50 g, 1.27 mmol, 1.0 equiv), bis(pinacolato)diboran (0.48 g, 1.90 mmol, 1.5 equiv), anhydrous potassium acetate (0.37 g, 3.81 mmol, 3.0 equiv), Pd(dppf)Cl<sub>2</sub> complex with dichloromethane (0.05 g, 0.06 mmol, 0.05 equiv). Product **3h** was obtained as colourless solid with 92.0% (0.52 g) yield.

$R_f = 0.46$  (SiO<sub>2</sub>, hexane/ethyl acetate 1:1); **<sup>1</sup>H NMR** (600 MHz, CDCl<sub>3</sub>)  $\delta$  [ppm]: 7.87 (t,  $J = 1.6$  Hz, 1H), 7.81 (m, 1H), 7.65-7.63 (m, 2H), 7.56-7.48 (m, 4H), 7.47 (d,  $J = 7.3$  Hz, 1H), 7.43 (s, 1H), 7.35 (d,  $J = 7.3$  Hz, 1H), 5.21 (s, 2H), 4.76 (s, 2H), 2.38 (s<sub>broad</sub>, 1H), 1.35 (s, 12H); **<sup>13</sup>C NMR** (151 MHz, CDCl<sub>3</sub>)  $\delta$  [ppm]: 155.9, 142.1, 139.3, 138.0, 132.7, 131.6, 130.9, 130.7, 129.7, 129.6, 128.1, 128.0, 127.5, 126.9, 126.3, 118.8, 116.9, 113.1, 84.0, 69.9, 62.0, 24.9; **IR (ATR)** [cm<sup>-1</sup>]: 3471, 2977, 2230, 1408, 1352, 1144; **HRMS (ESI)**: Calcd for C<sub>27</sub>H<sub>28</sub>BNO<sub>4</sub> ( $m/z$ ): [M+Na]<sup>+</sup> 464.2004, found: [M+Na]<sup>+</sup> 464.2008

**3-((2-(Hydroxymethyl)-5-(4,4,5,5-tetramethyl-1,3,2-dioxaborolan-2-yl)phenoxy)methyl)benzonitrile (3i)**

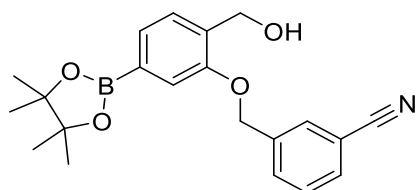

3-((5-Bromo-2-(hydroxymethyl)phenoxy)methyl)benzonitrile (**S2i**) (0.95 g, 3.0 mmol, 1.0 equiv), bis(pinacolato)diboran (0.84 g, 3.3 mmol, 1.1 equiv), anhydrous potassium acetate (0.88 g, 9.0 mmol, 3.0 eq.), Pd(dppf)Cl<sub>2</sub> complex with dichloromethane (0.12 g, 0.15 mmol, 0.05 equiv). Product **3i** was obtained as colourless solid with 76.1% (0.83 g) yield. Product **3i** was crystallized from cyclohexane/ethyl acetate mixture.

$R_f = 0.63$  (SiO<sub>2</sub>, hexane/ethyl acetate 1:1); **<sup>1</sup>H NMR** (600 MHz, DMSO-d<sub>6</sub>)  $\delta$  [ppm]: 7.93 (s, 1H), 7.83 (d,  $J = 13.5, 7.8$  Hz, 1H), 7.63 (t,  $J = 7.8$  Hz, 1H), 7.46 (d,  $J = 7.4$  Hz, 1H), 7.33 (d,  $J = 7.4$  Hz, 1H), 7.24 (s, 1H), 5.20 (s, 2H), 5.30 (t,  $J = 5.5$  Hz, 1H), 4.60 (d,  $J = 5.0$  Hz, 2H), 1.30 (s, 12H); **<sup>13</sup>C NMR** (151 MHz, DMSO-d<sub>6</sub>)  $\delta$  [ppm]: 154.3, 139.1, 134.5, 132.0, 131.5, 130.6, 129.7,

---

127.4, 126.5, 118.8, 116.1, 111.4, 83.7, 67.9, 58.0, 24.7; **IR (ATR)** [cm<sup>-1</sup>]: 3435, 2980, 2227, 1571, 1509, 1405, 1351, 1238, 1141, 1064, 968, 924, 853, 785, 683; **HRMS (ESI)**: Calcd for C<sub>21</sub>H<sub>24</sub>BNO<sub>4</sub> (*m/z*): [M+Na]<sup>+</sup> 388.1691, found: [M+Na]<sup>+</sup> 388.1696

## 2. SUPPORTING FIGURES AND TABLES

Table S1. Structures and HTRF data for obtained compounds

| No | Structure                                                                           | % of undissociated complex at 5 $\mu$ M | IC <sub>50</sub>      |                                                                                       |
|----|-------------------------------------------------------------------------------------|-----------------------------------------|-----------------------|---------------------------------------------------------------------------------------|
|    |                                                                                     |                                         | Determined [ $\mu$ M] | Plot                                                                                  |
| 4a | 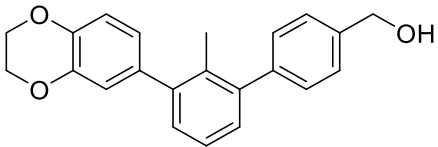   | 42                                      | <b>5.52±0.04</b>      |    |
| 4b |    | 88                                      | -                     | --                                                                                    |
| 4c |   | 98                                      | -                     | -                                                                                     |
| 4d |  | 73                                      | -                     | -                                                                                     |
| 4e |  | 1                                       | <b>0.51±0.01</b>      |  |
| 4f |  | 15                                      | <b>0.95±0.02</b>      |  |
| 4g |  | 56                                      | -                     | -                                                                                     |

4h

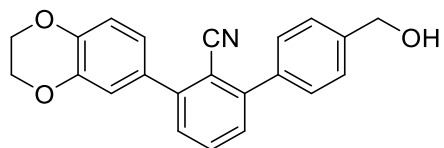

21

1.17±0.12

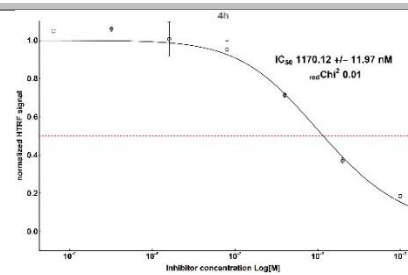

5b

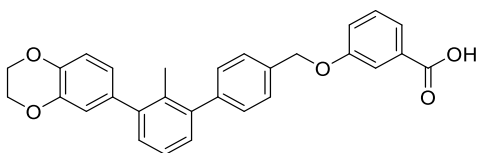71  
at 50 μM

-

-

5d

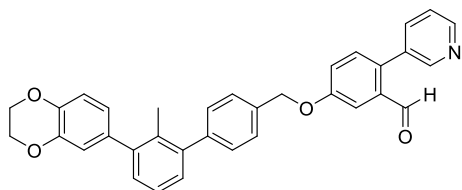65  
at 50 μM

-

-

5f

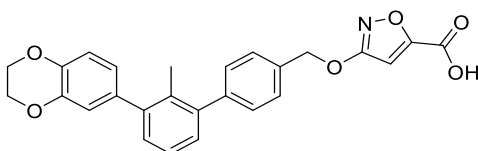

90

-

-

5h

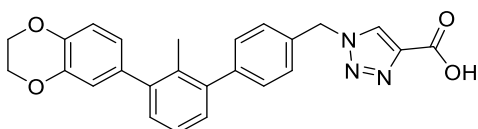

100

-

-

5j

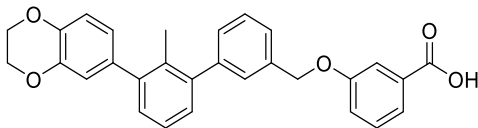

90

-

-

5l

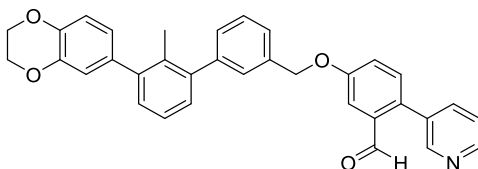95  
at 50 μM

-

-

5n

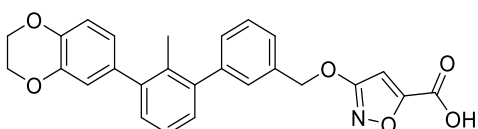

77

-

-

5p

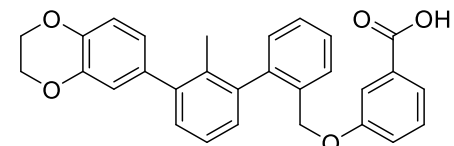87  
at 50 μM

-

-

5r

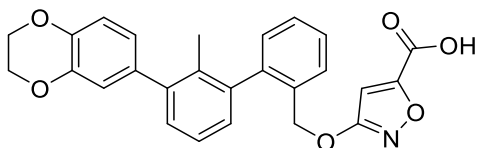

100

-

-

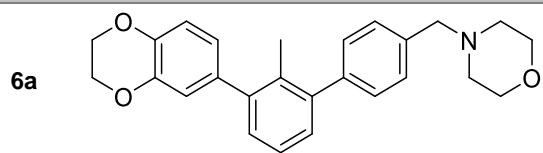

55

-

-

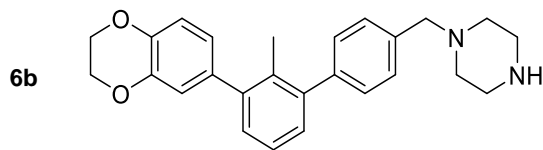

5

-

-

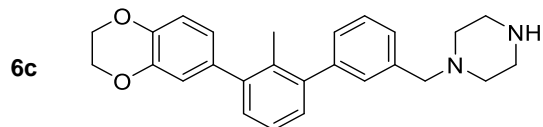

56

-

-

% of  
undissociated  
complex at  
5 nM

Determined  
[nM]

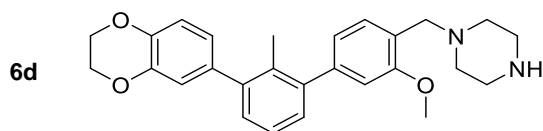

63

-

-

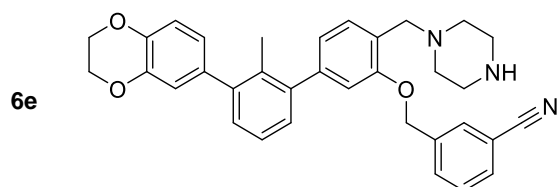

88

-

-

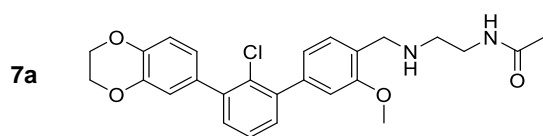

7a

0

**0.82±0.02**

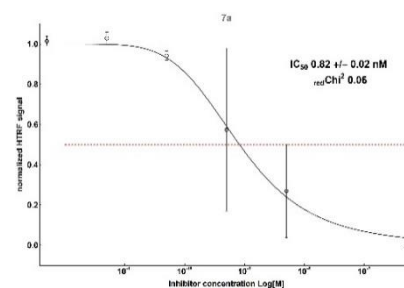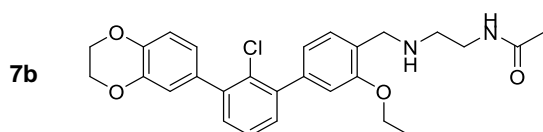

7b

5

-

-

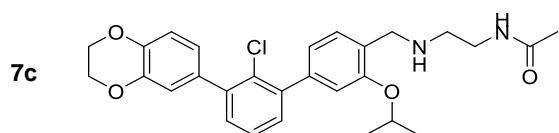

7c

5

-

-

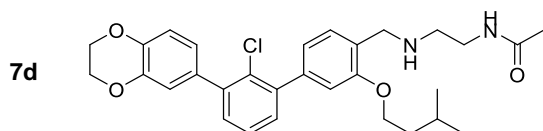

7d

65

-

-

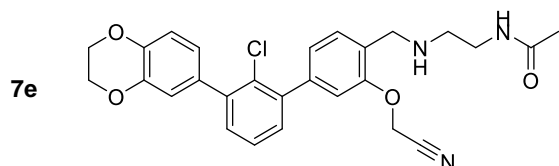

7e

1

-

-

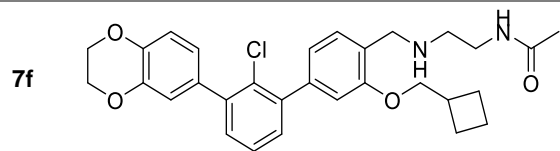

53

-

-

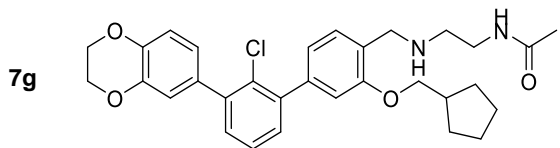

76

-

-

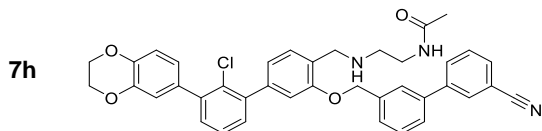

100

-

-

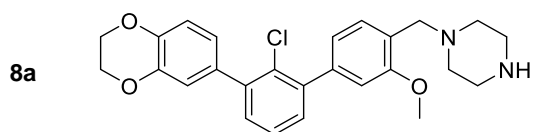

38

**18.09±0.09**

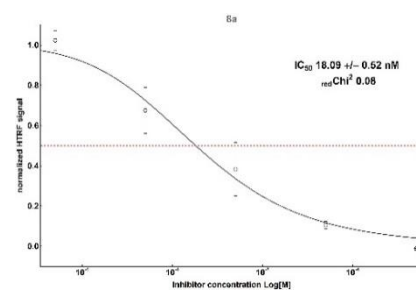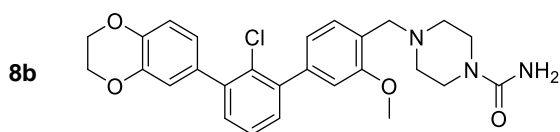

28

-

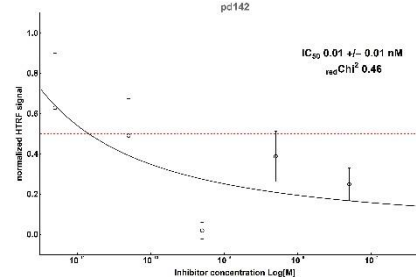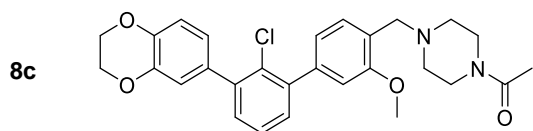

40

-

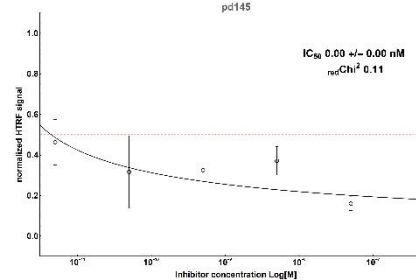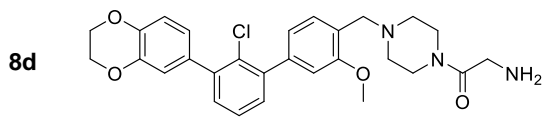

5

-

-

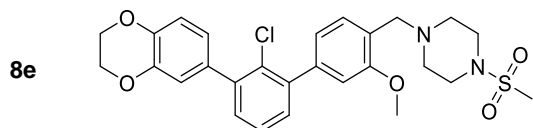

88

**104.44±2.17**

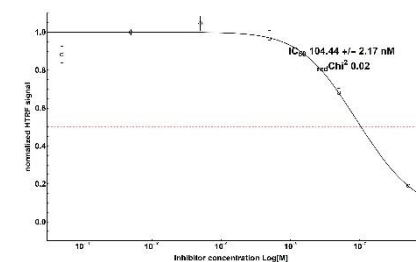



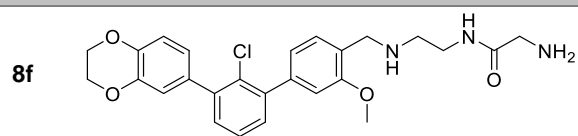

8

-

-

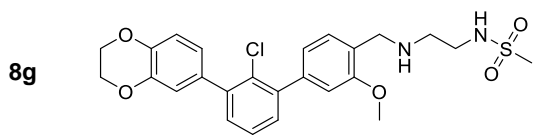

32

**2.07±0.04**

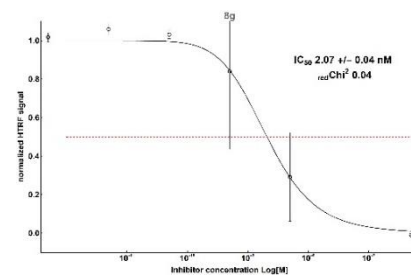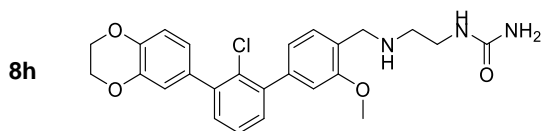

6

-

-

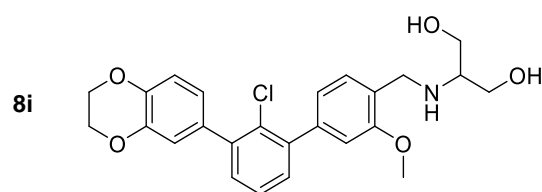

0

-

-

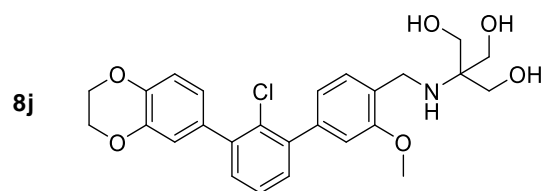

0

-

-

**BMS**

-

**1166**

53

**3.89±0.19**

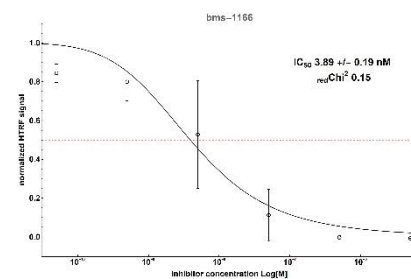

**Table S2.** Data collection and refinement statistics (molecular replacement)

| <b>Data collection</b>                              |                              |
|-----------------------------------------------------|------------------------------|
| Wavelength (Å)                                      | 0.9184                       |
| Space group                                         | P 1 21 1                     |
| Cell dimensions                                     |                              |
| <i>a</i> , <i>b</i> , <i>c</i> (Å)                  | 67.09 75.25 74.35            |
| $\alpha$ , $\beta$ , $\gamma$ (°)                   | 90.0 96.29 90.0              |
| Resolution range (Å)                                | 47.01 - 2.30 (2.42- 2.30)    |
| <i>R</i> <sub>merge</sub>                           | 0.119 (3.196)                |
| <i>I</i> / $\sigma$ <i>I</i>                        | 15.00 (1.0)                  |
| Completeness (%)                                    | 99.0 (98.7)                  |
| Redundancy                                          | 13.4 (13.0)                  |
| Total reflections                                   | 217995 (21254)               |
| CC1/2                                               | 1.0 (0.77)                   |
| <b>Refinement statistics</b>                        |                              |
| No. reflections                                     | 32189 (3143)                 |
| <i>R</i> <sub>work</sub> / <i>R</i> <sub>free</sub> | 0.246/0.290<br>(0.425/0.471) |
| Wilson B-factor                                     | 53.15                        |
| No. atoms                                           | 5360                         |
| Protein                                             | 5216                         |
| Water                                               | 42                           |
| Ramachandran favoured (%)                           | 91.94                        |
| Ramachandran allowed (%)                            | 7.18                         |
| Ramachandran outliers (%)                           | 0.88                         |
| <i>B</i> -factors                                   | 56.60                        |
| Protein                                             | 56.24                        |
| Water                                               | 52.59                        |
| R.m.s deviations                                    |                              |
| Bond lengths (Å)                                    | 0.011                        |
| Bond angles (°)                                     | 1.11                         |

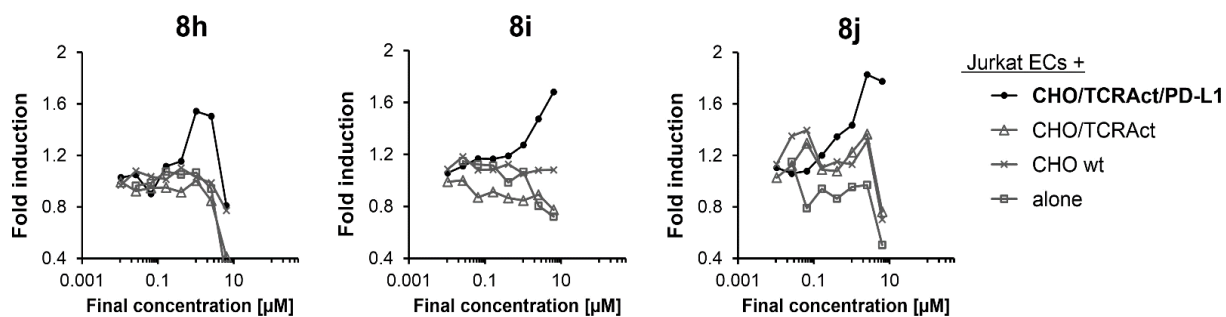

**Figure S1.** Terphenyl compounds **8h**, **8i**, and **8j** bioactivity requires the presence of PD-L1 in the ICB assay. Results of the Immune Checkpoint Blockade (ICB) assay, where **8h**, **8i**, and **8j** were used to restore the activation of effector Jurkat-ECs. Jurkat-ECs were either kept alone, or contacted with one of the following cell lines: wild type CHO K1 cells (CHO wt), CHO K1 cells expressing TCR Activator (CHO/TCRAct), or CHO K1 cells expressing TCR Activator and PD-1 receptor (CHO/TCRAct/PD-1). The cells were incubated with the indicated concentrations of the compounds for 6 hours and luminescence was measured as an indicator of TCR-dependent activation of Jurkat-ECs. The graphs present fold induction of the luminescence signal relative to DMSO-treated cells. Increased activation of Jurkat-ECs is observed only when the cells were contacted with PD-L1-expressing CHO/TCRAct/PD-L1 cells.

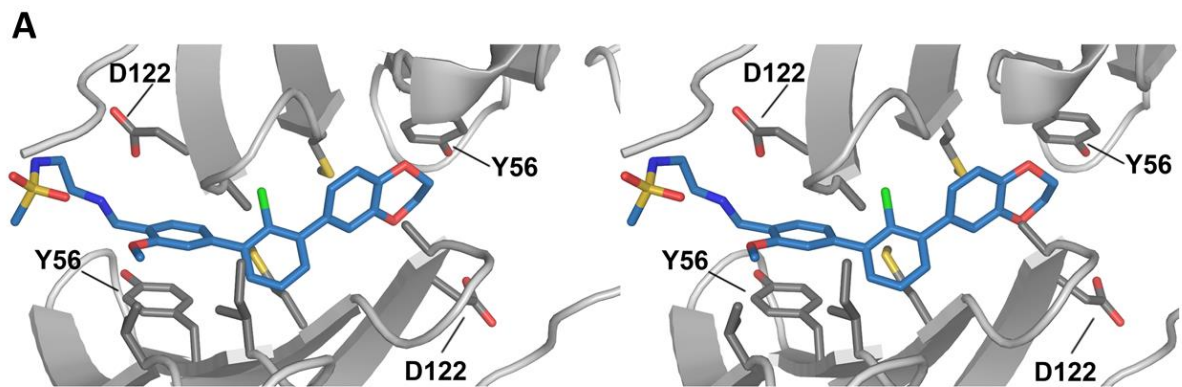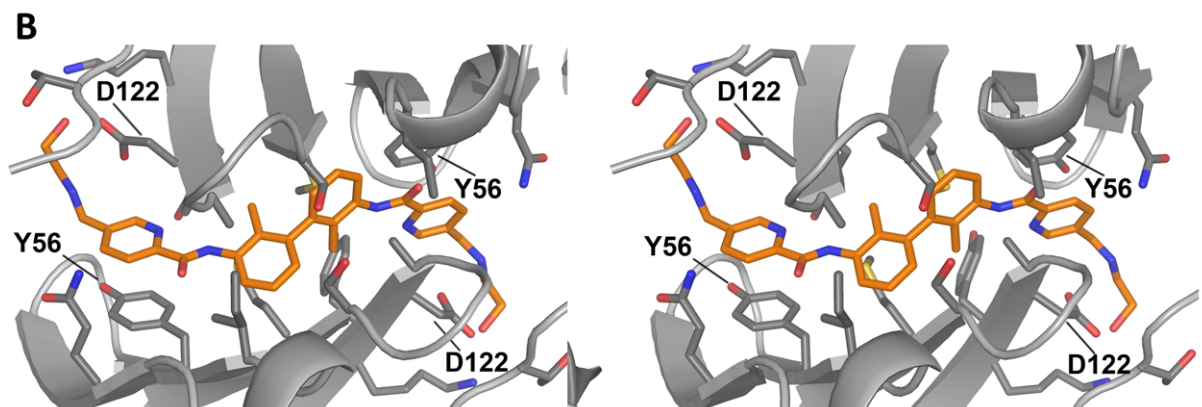

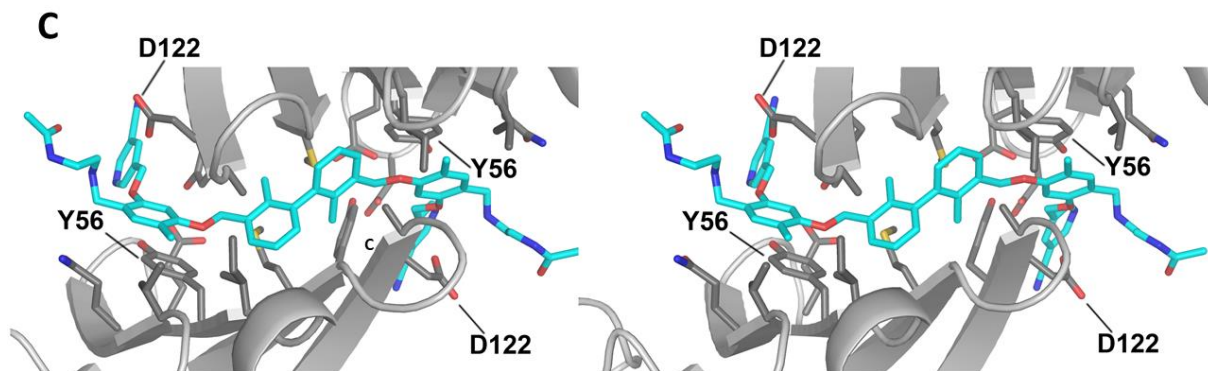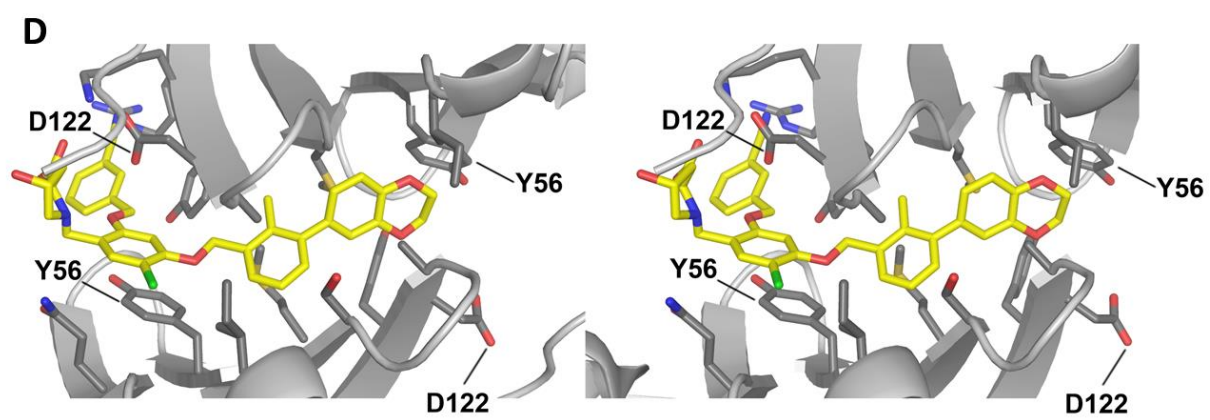

**E**

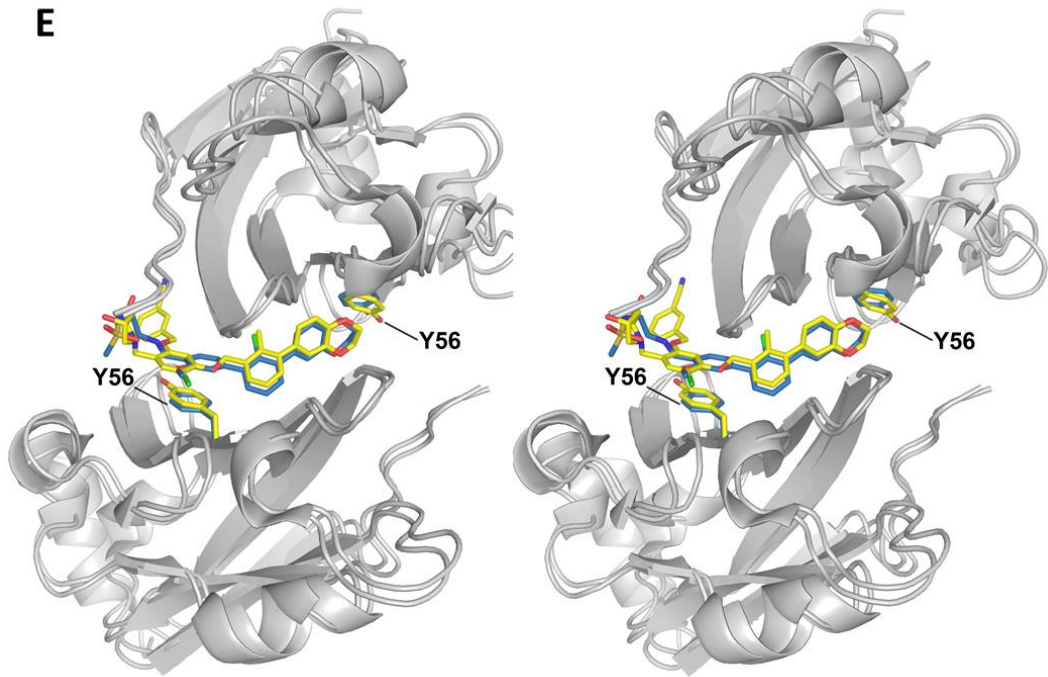

**F**

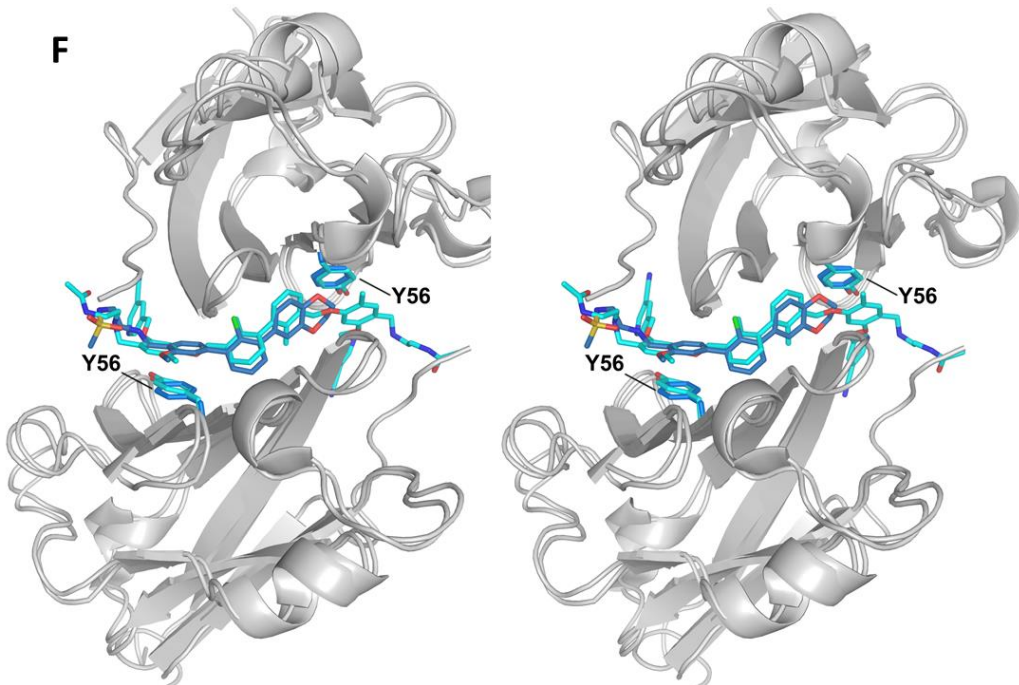

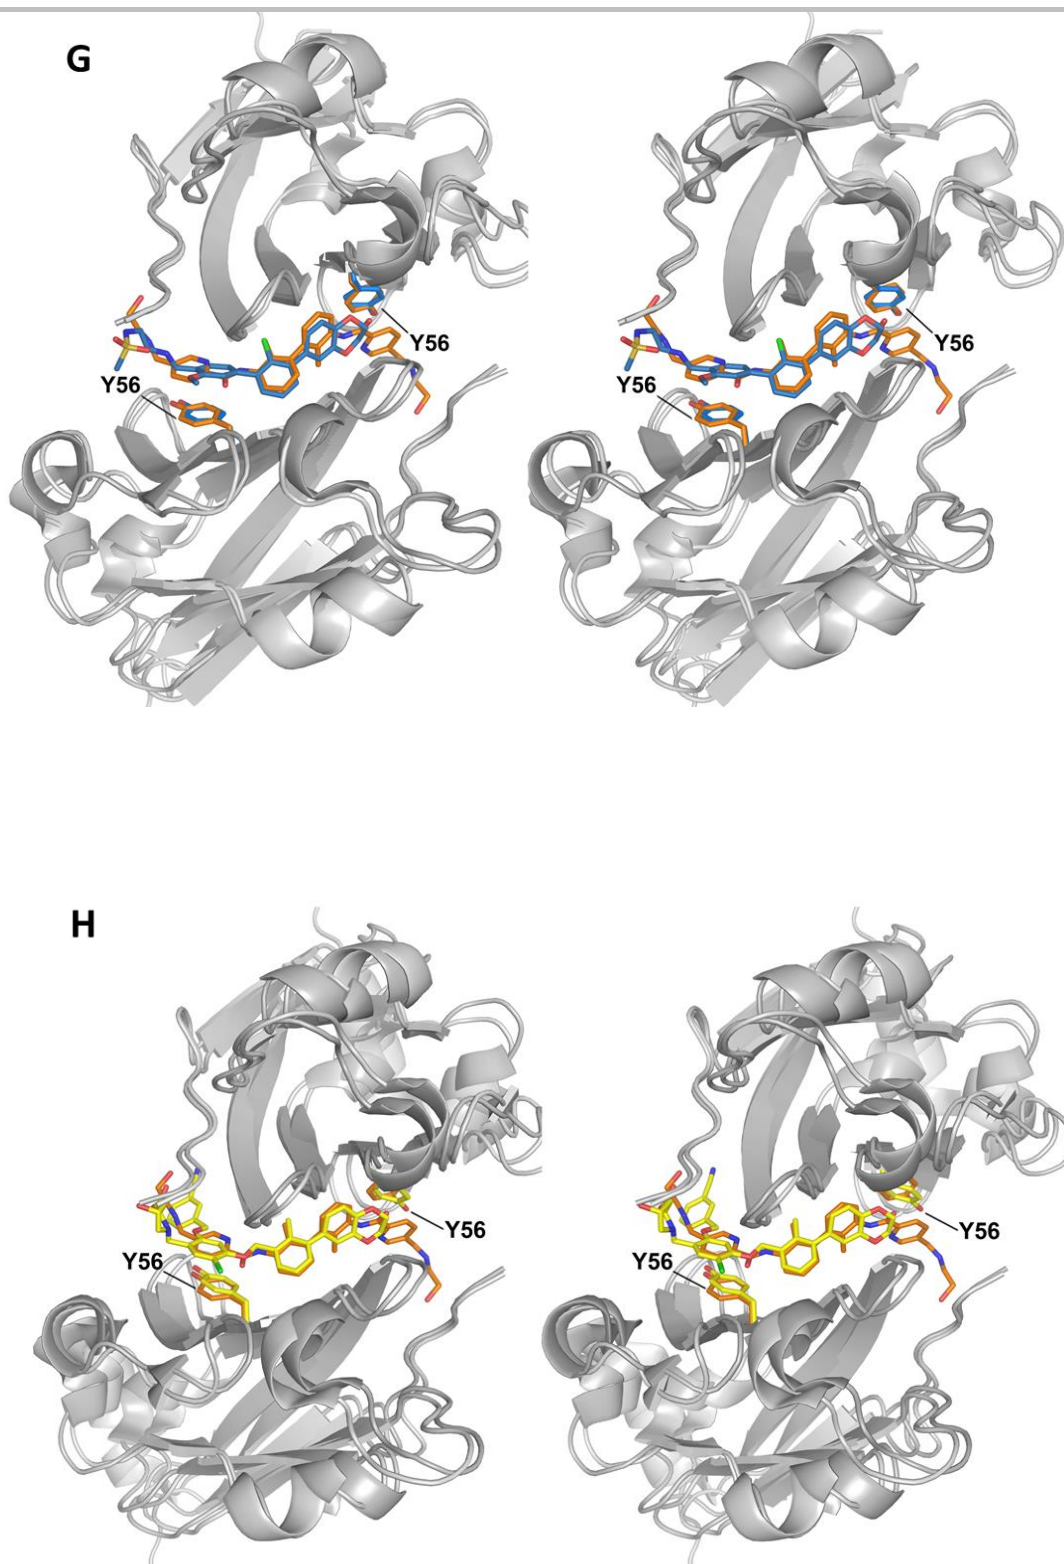

**Figure S2.** Comparison of the terphenyl-based with biphenyl-based inhibitor structures. (A-D) The stereoviews of detailed interactions of **8g** (blue), **ARB-272572 - Compound A** (orange), the C2-symmetric inhibitor (cyan) and **BMS-1166** (yellow) with the PD-L1 molecules. (E) Superposition of the **8g**/PD-L1 (blue) and **BMS-1166**/PD-L1 (yellow) structures (stereoview). (F) Superposition of the **8g**/PD-L1 (blue) and the C2-symmetric inhibitor/PD-L1 (cyan) structures (stereoview). (G) Superposition of the **8g**/PD-L1 (blue) and **ARB-272572**/PD-L1 (orange) structures (stereoview). (H) Superposition of the **BMS-1166**/PD-L1 (yellow) and **ARB-272572**/PD-L1 (orange) structures (stereoview).

### 3. COPIES OF NMR SPECTRA

#### 2a. 6-(3-Bromo-2-methylphenyl)-1,4-benzodioxane

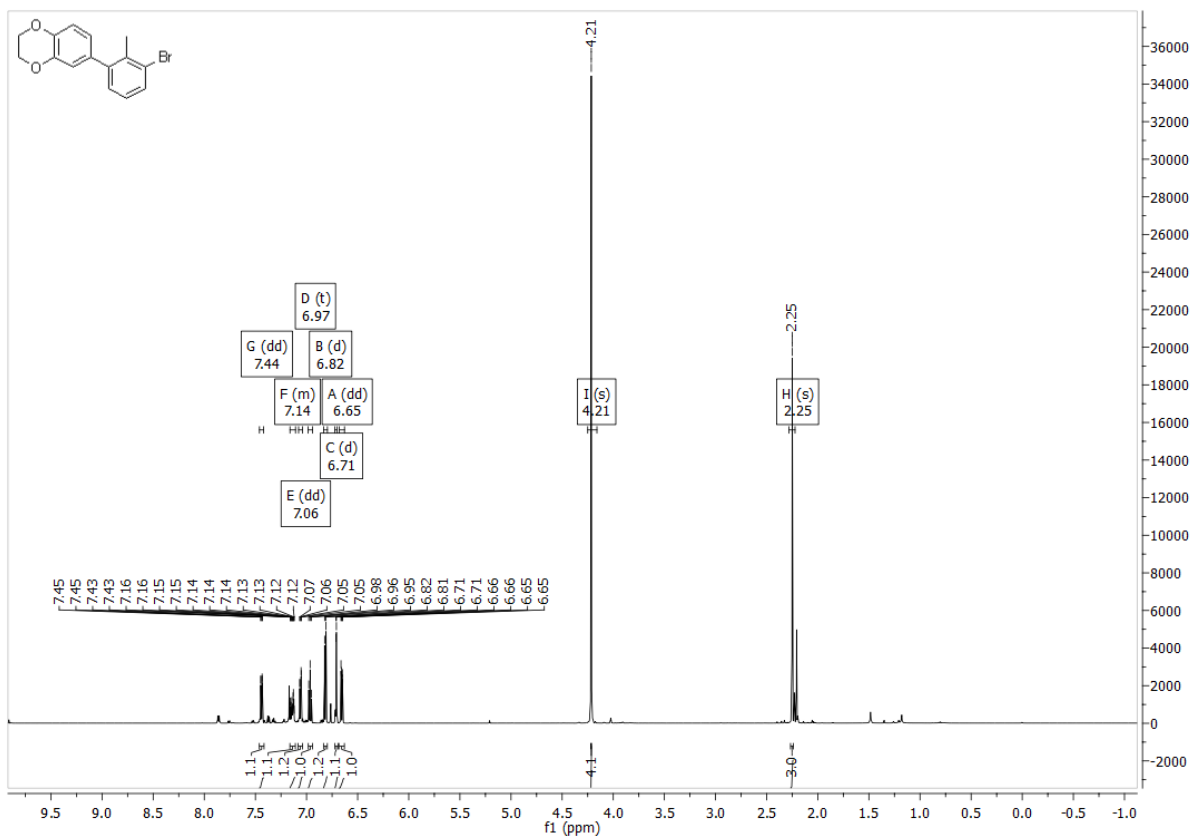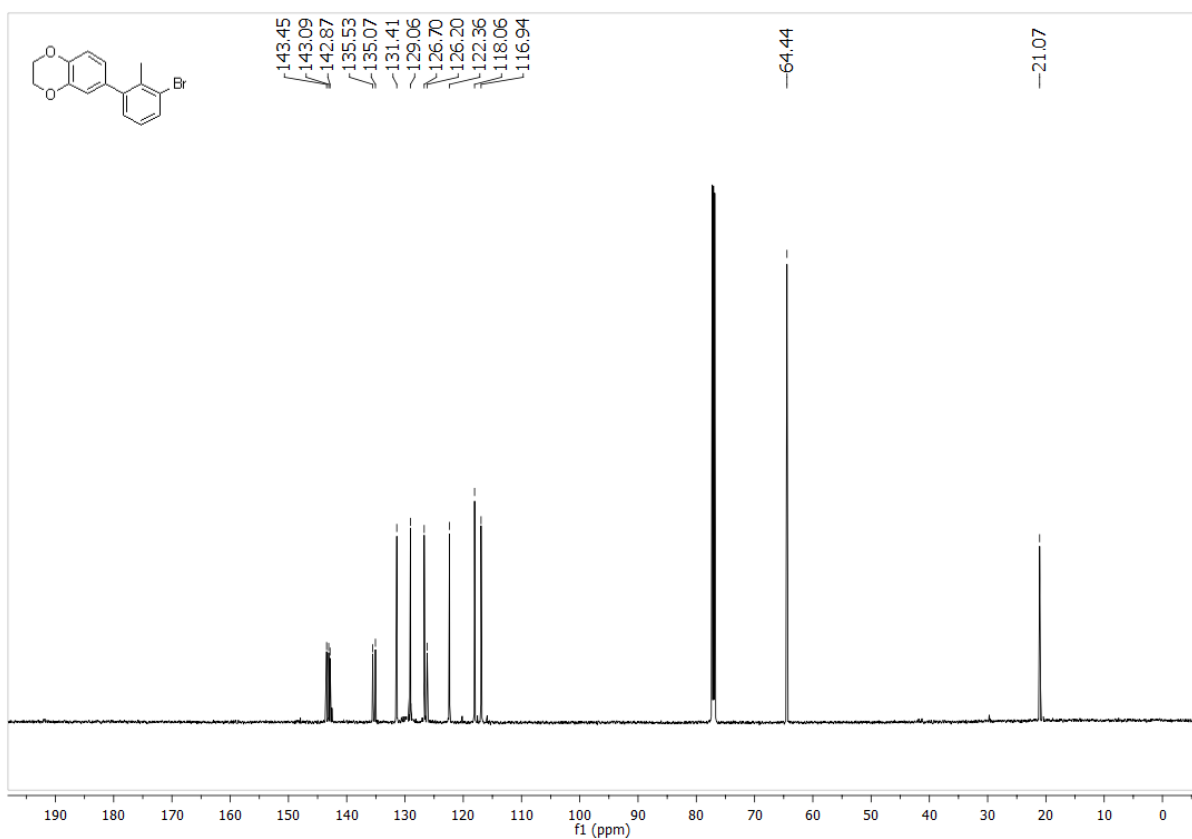



## 2b. 6-(2-Amino-3-bromophenyl)-1,4-benzodioxane

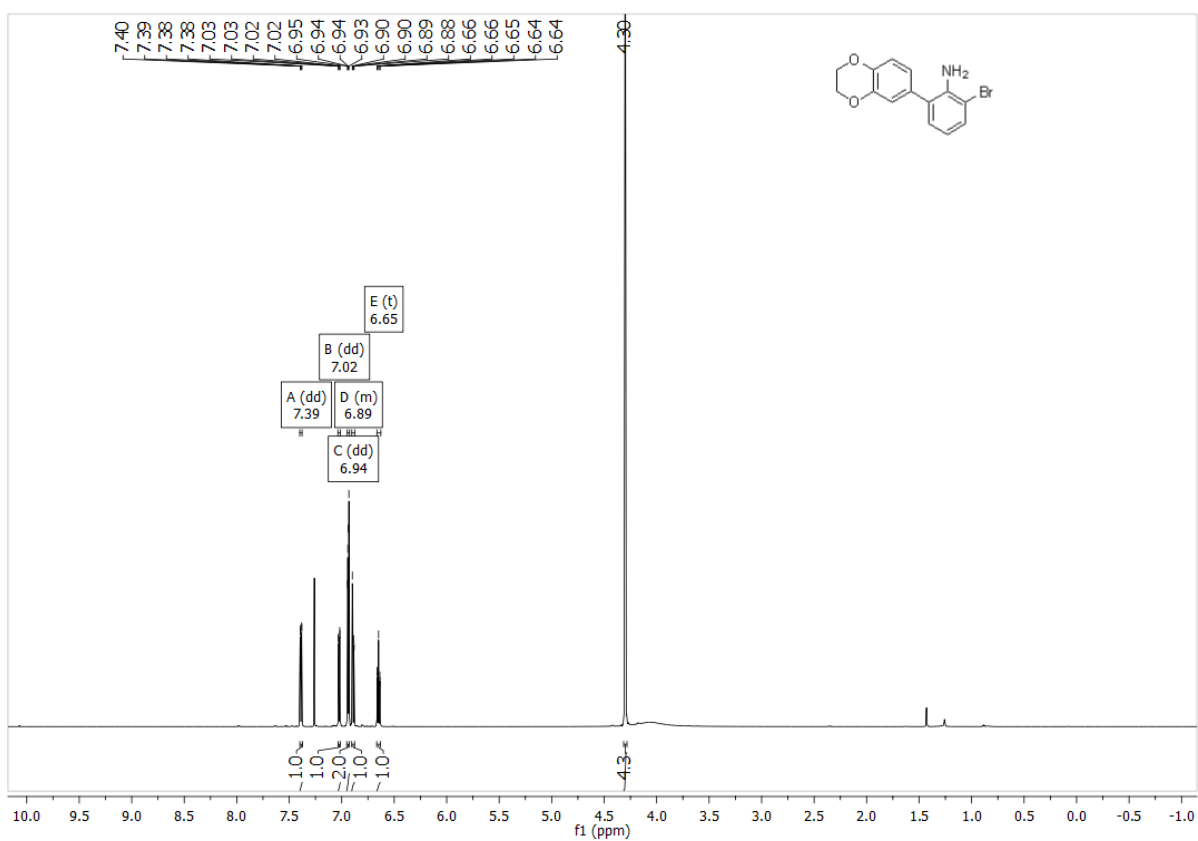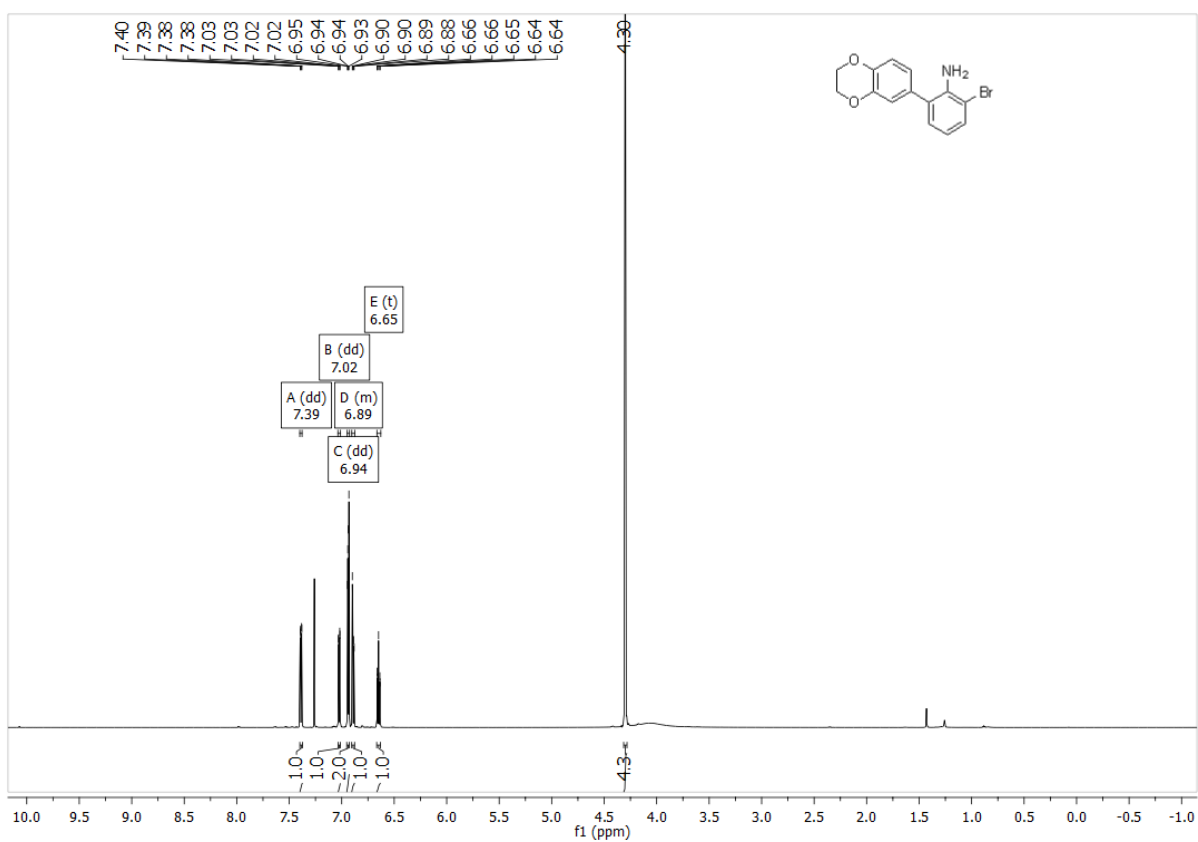

## 2c. 6-(3-Bromo-2-chlorophenyl)-1,4-benzodioxane

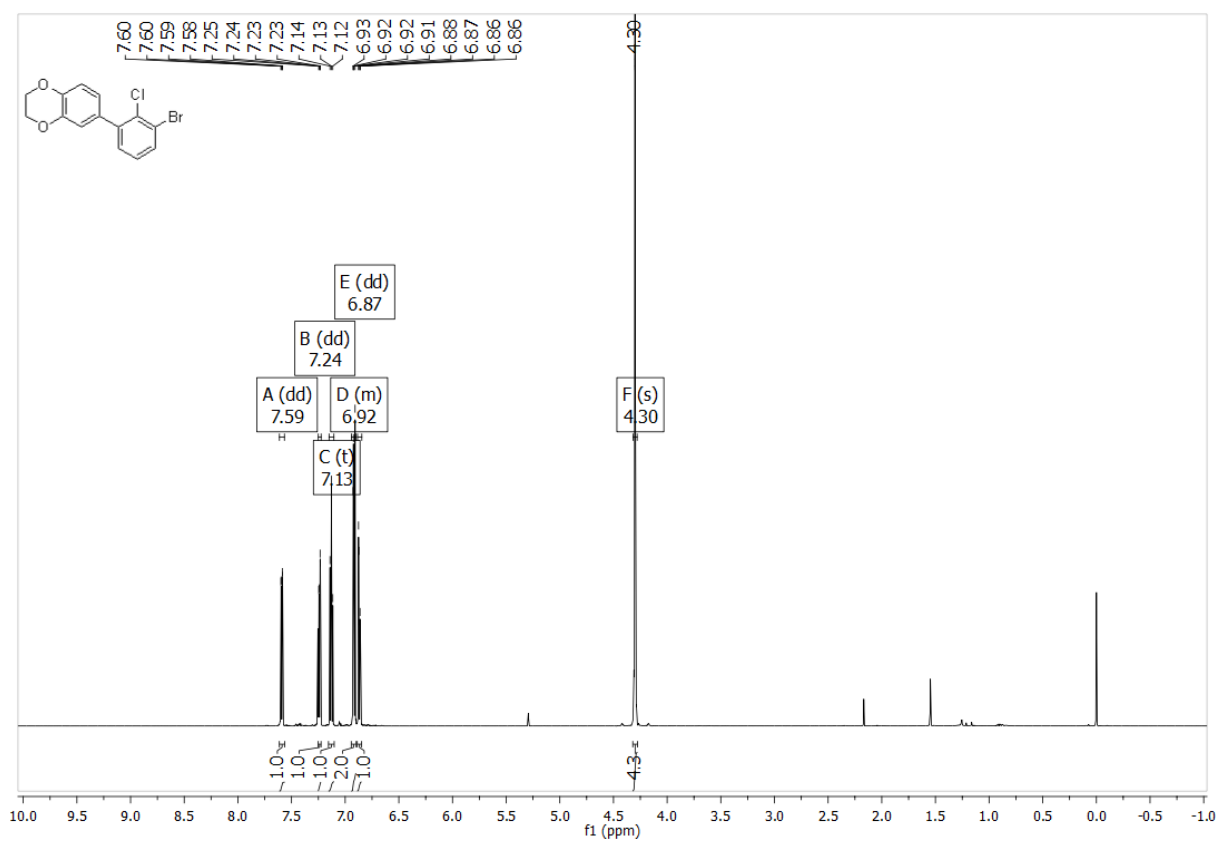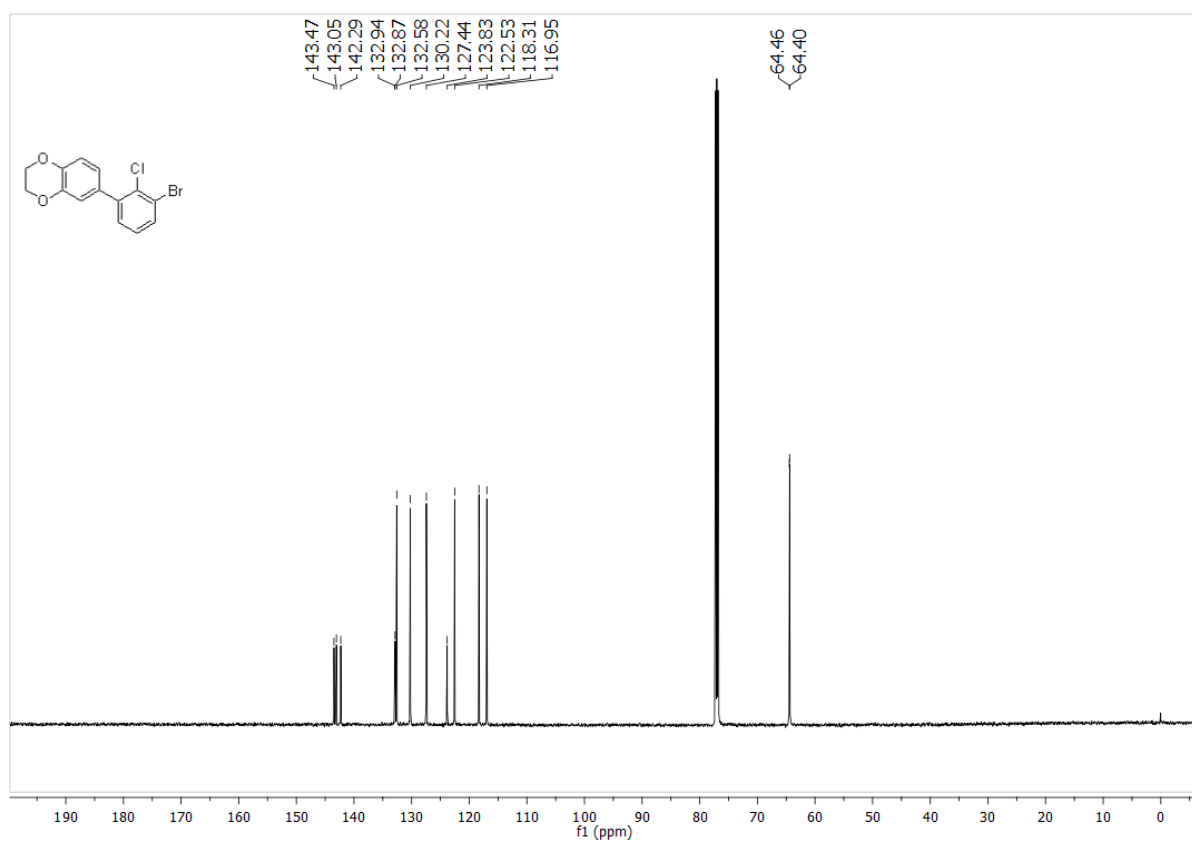

# I-O. 4-bromo-2-hydroxymethylbenzyl alcohol

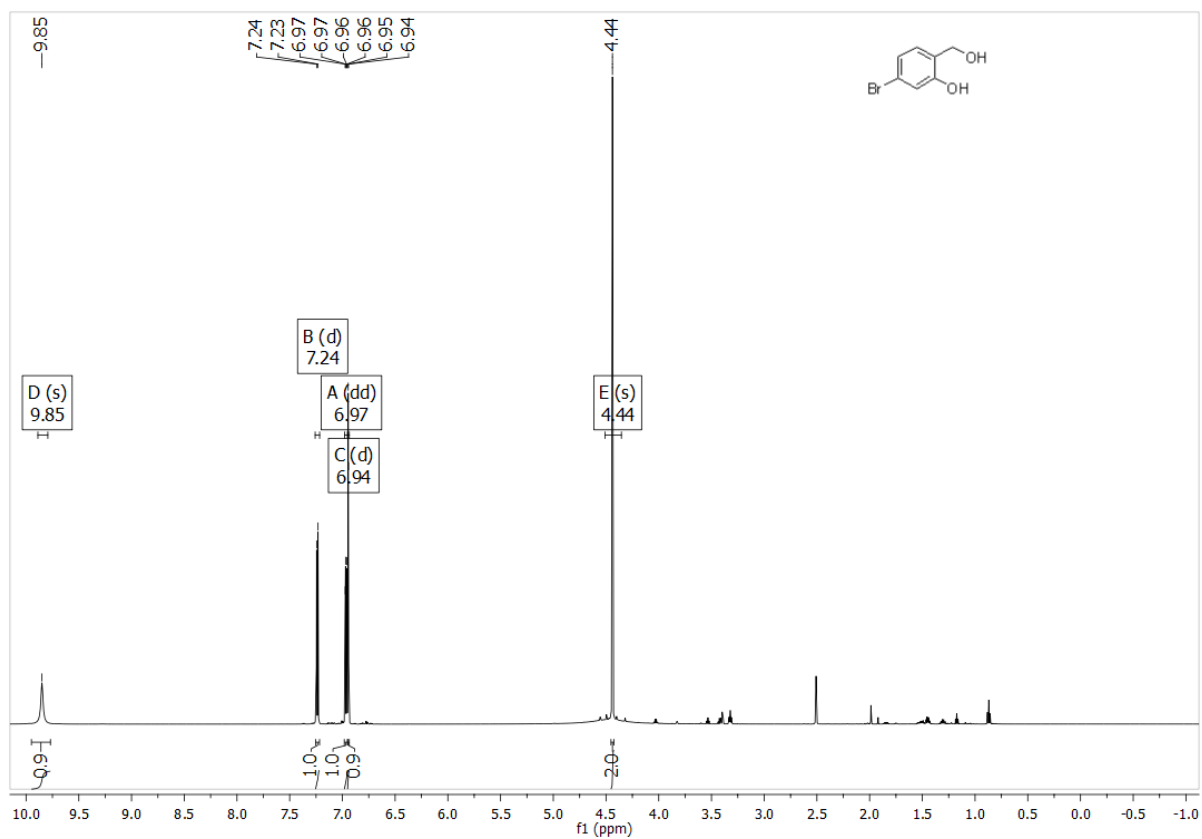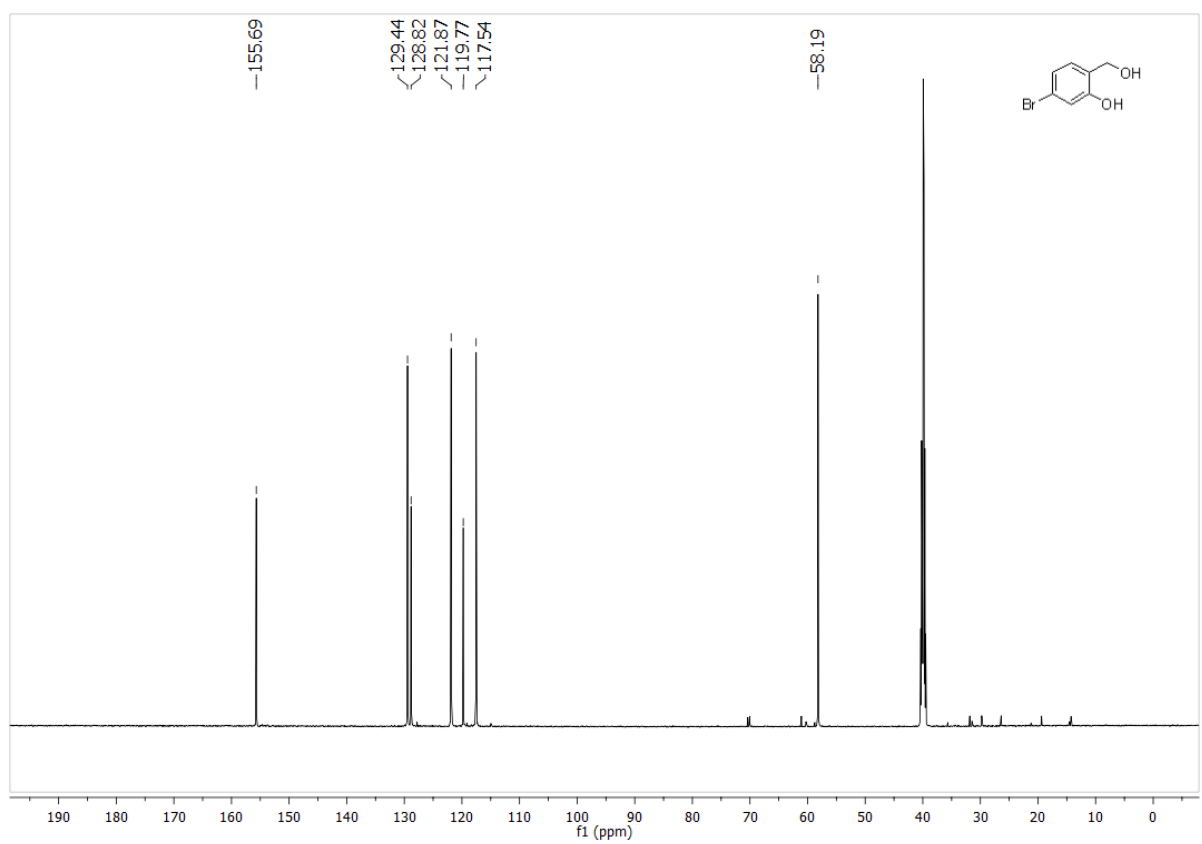

## Ib. (4-Bromo-2-ethoxyphenyl)methanol

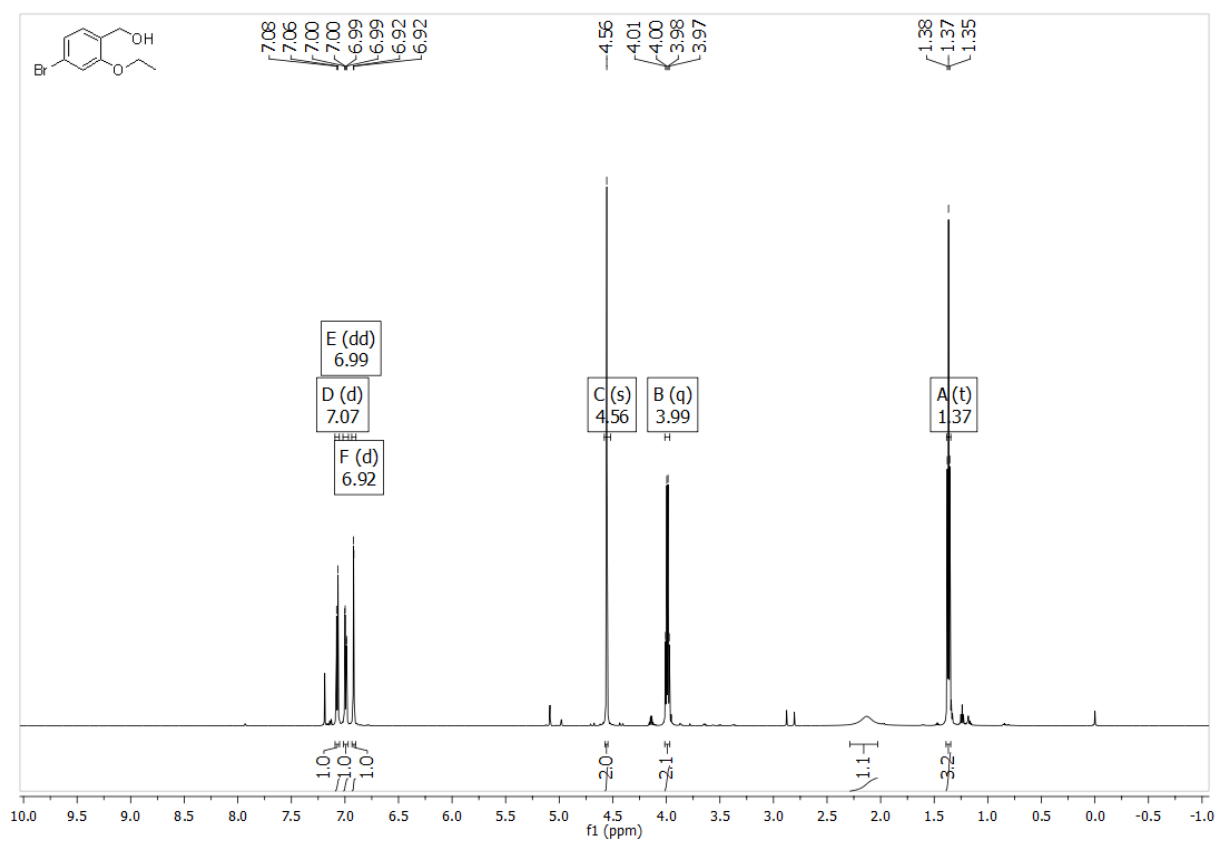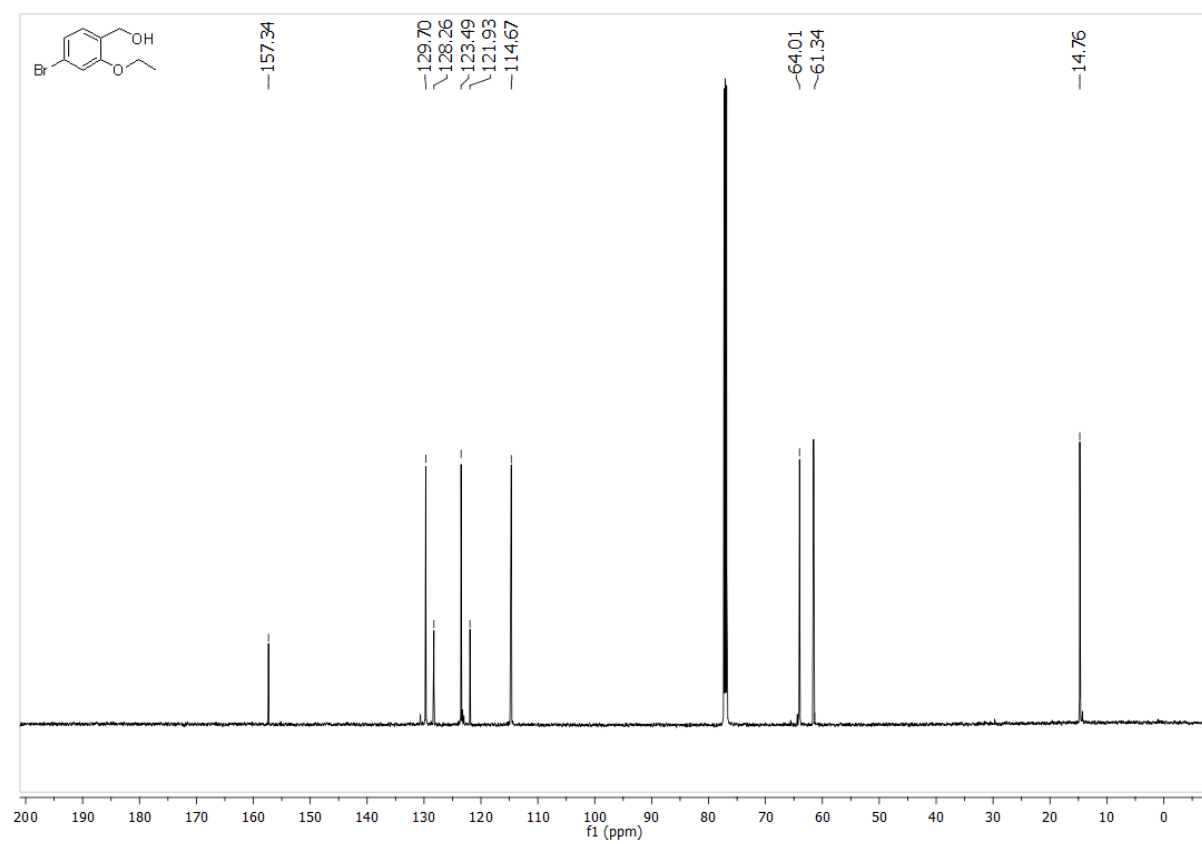

# Ic. (4-Bromo-2-isopropoxyphenyl)methanol

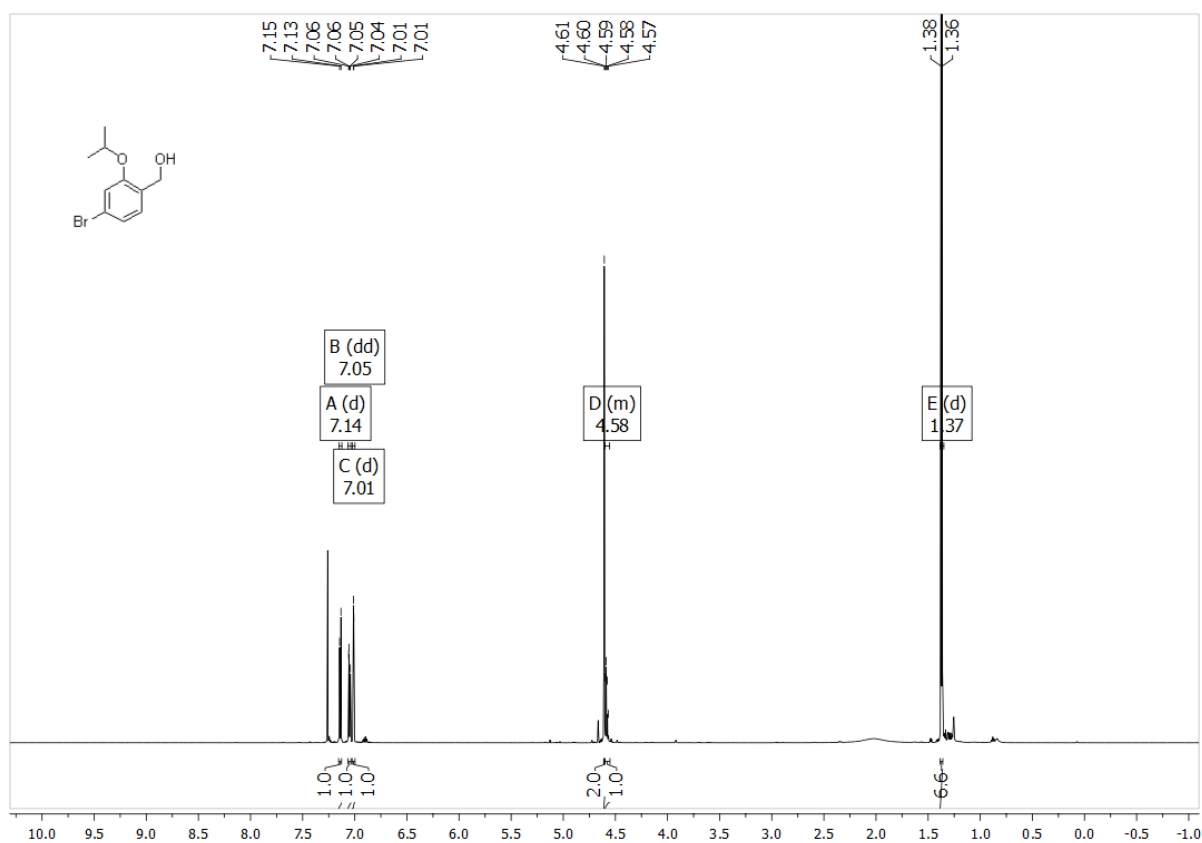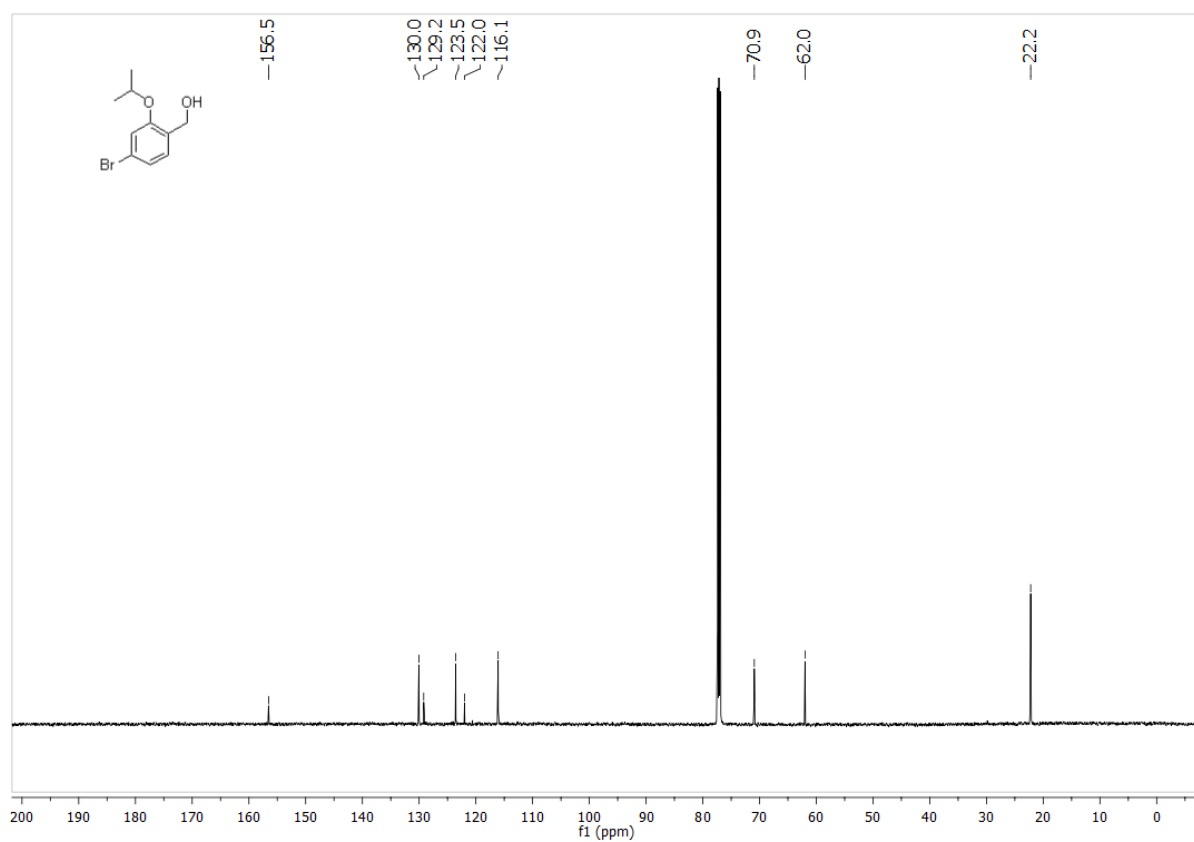

# Id. (4-Bromo-2-isopentyloxyphenyl)methanol

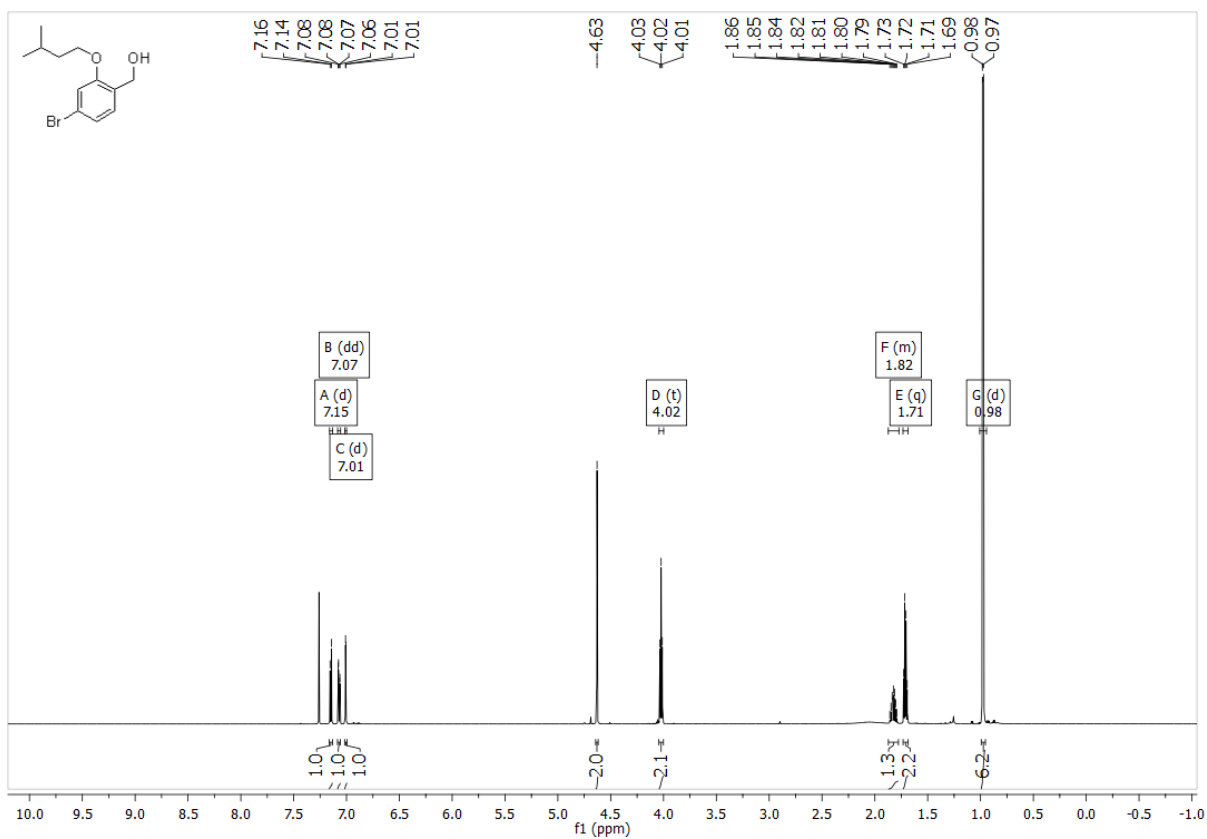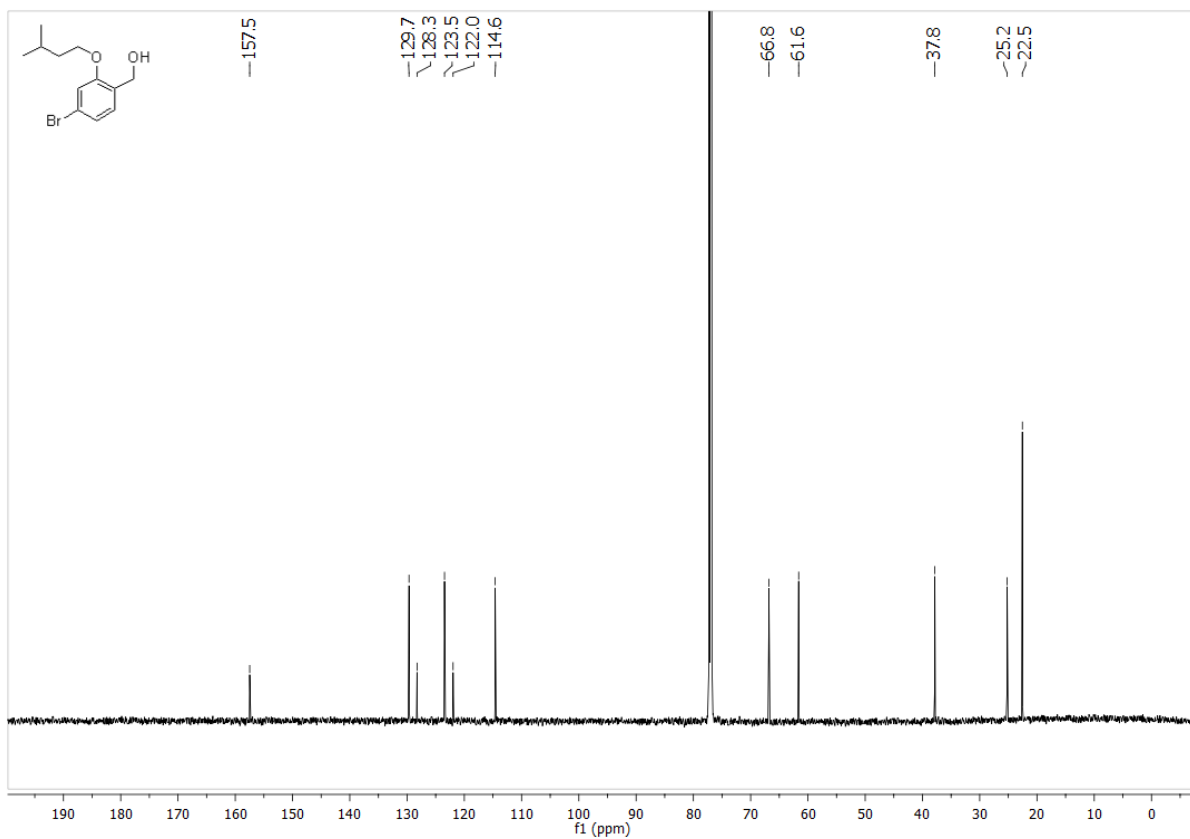

## 1e. 2-(5-Bromo-2-(hydroxymethyl)phenoxy)acetonitrile

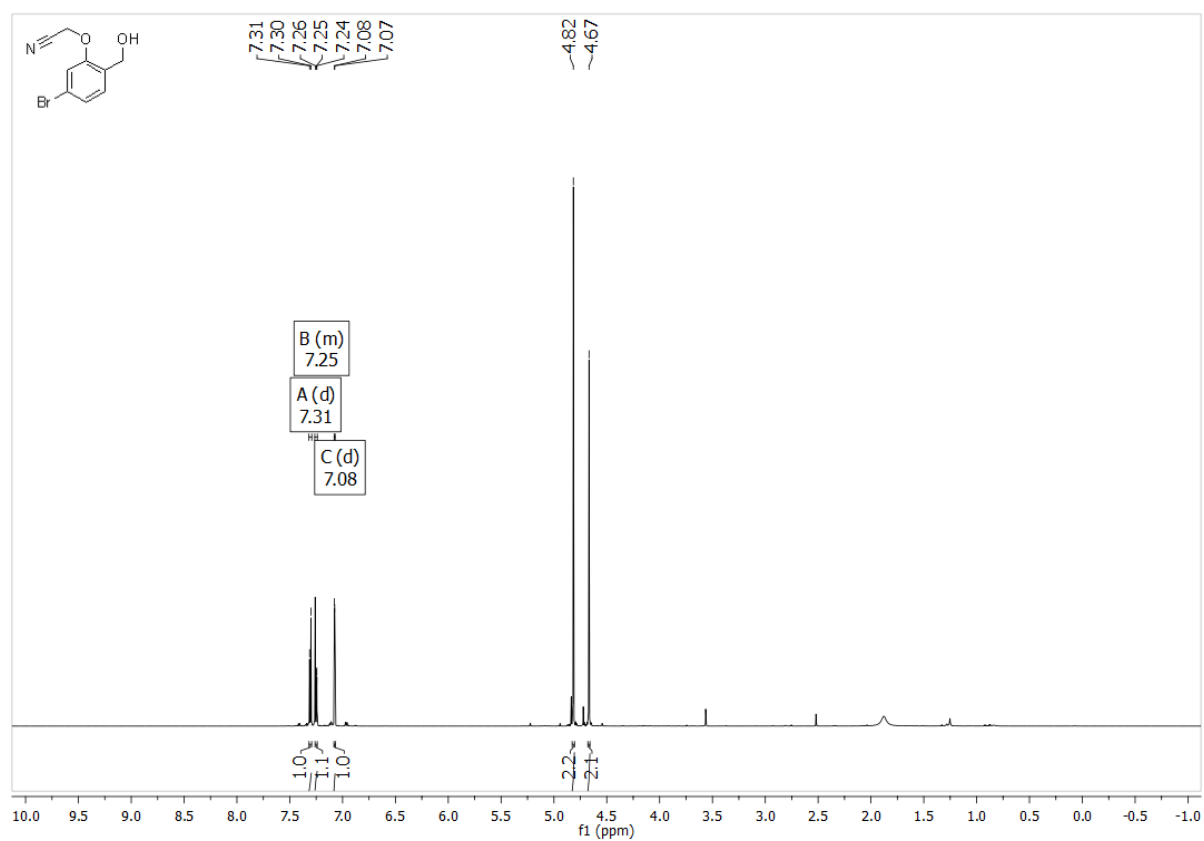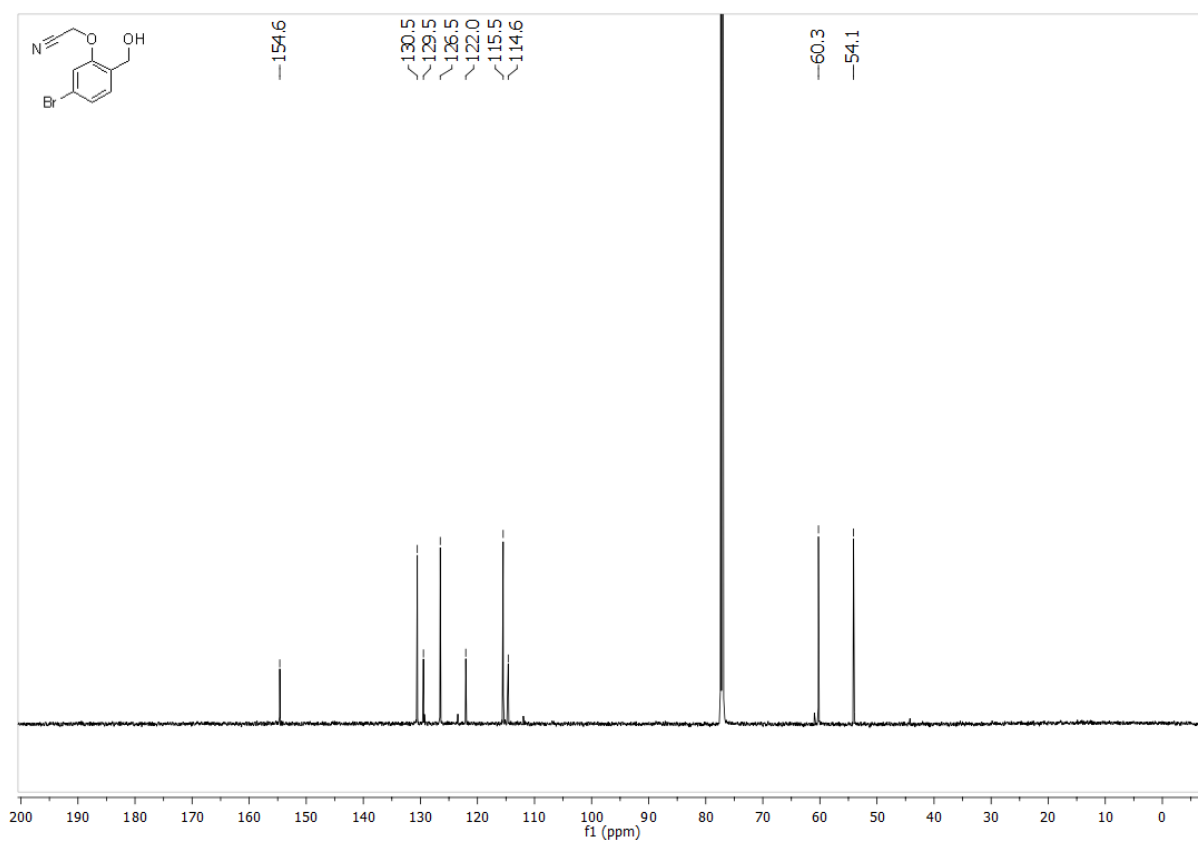

### If. (4-Bromo-2-(cyclobutylmethoxy))methanol

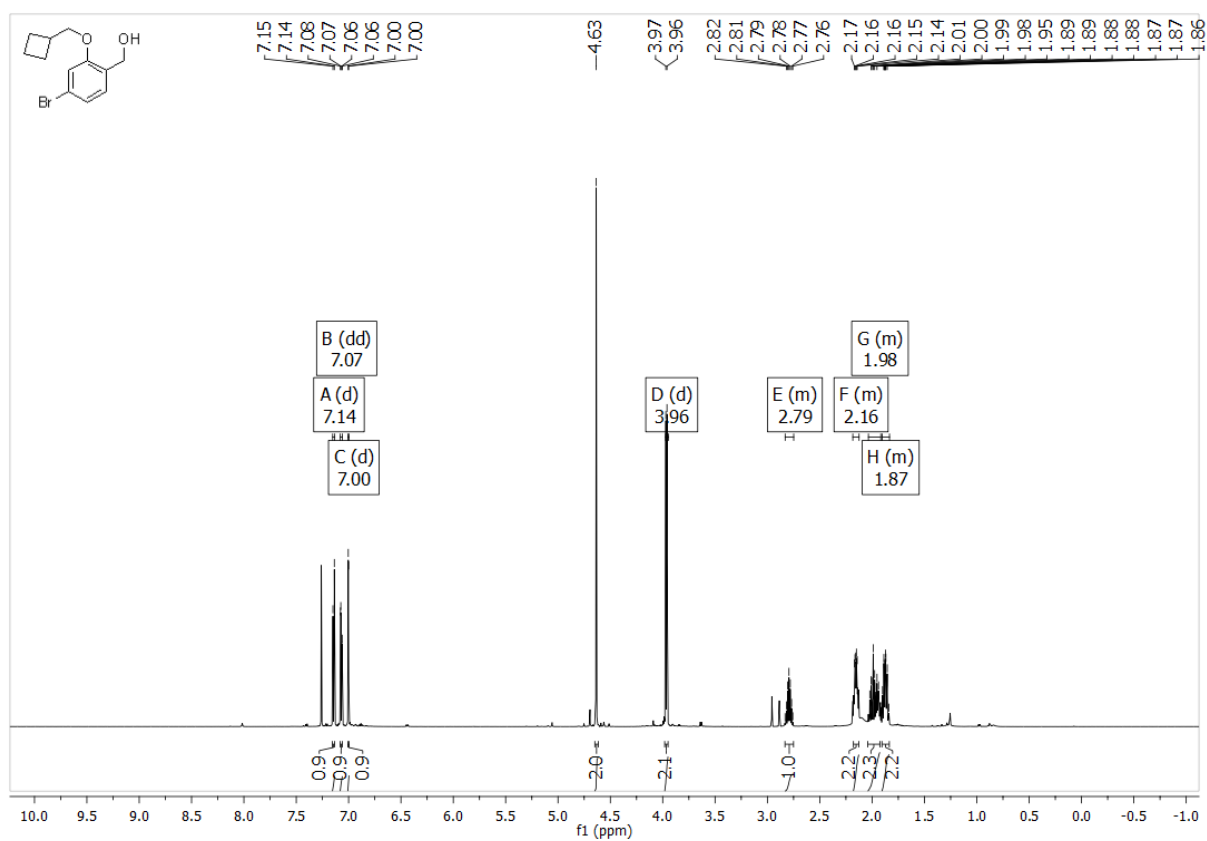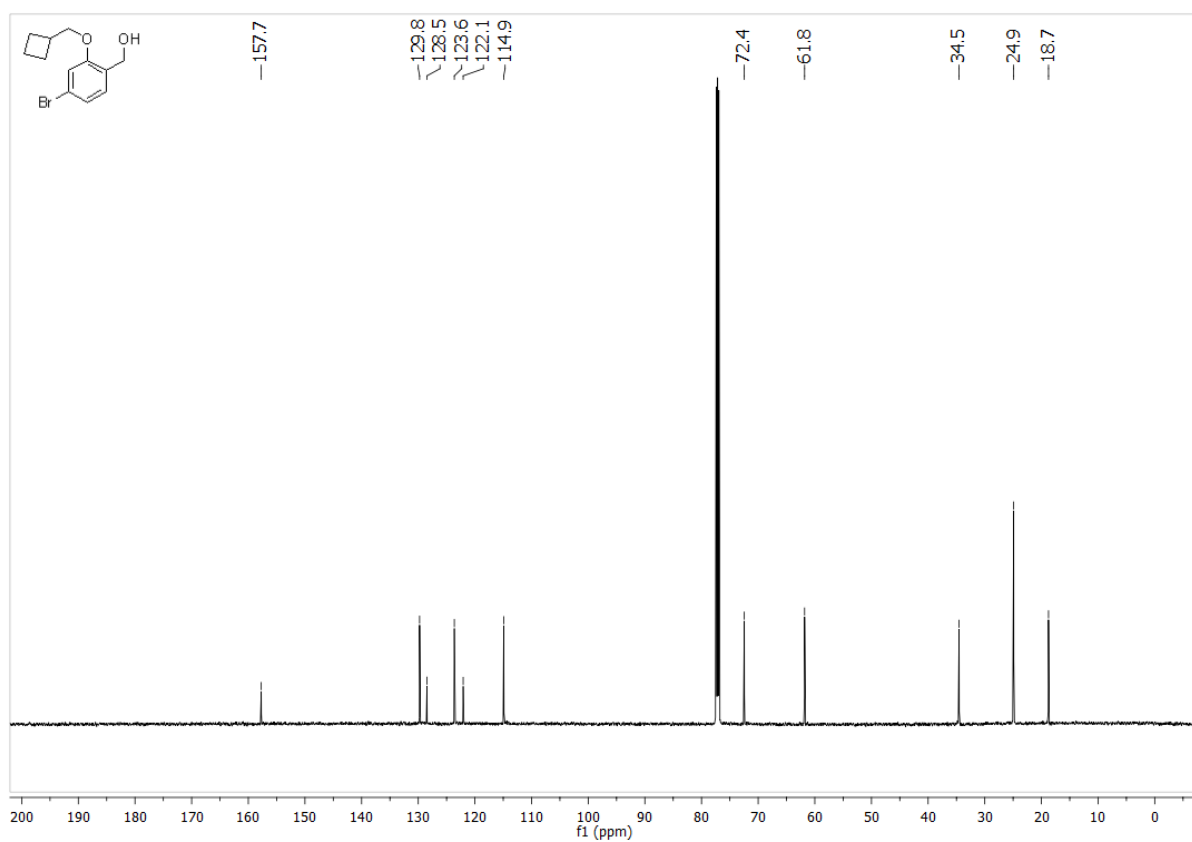



**Fig. (4-Bromo-2-(cyclopentylmethoxy))methanol**

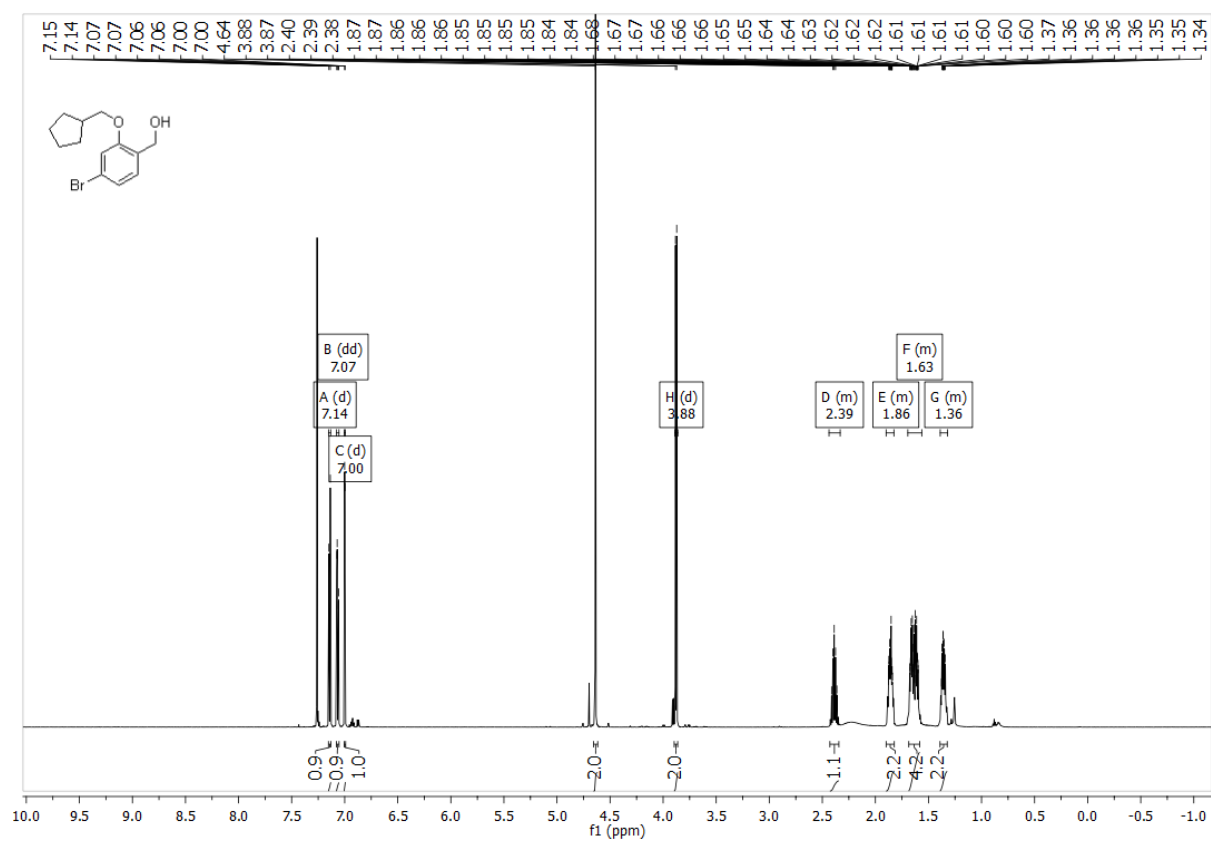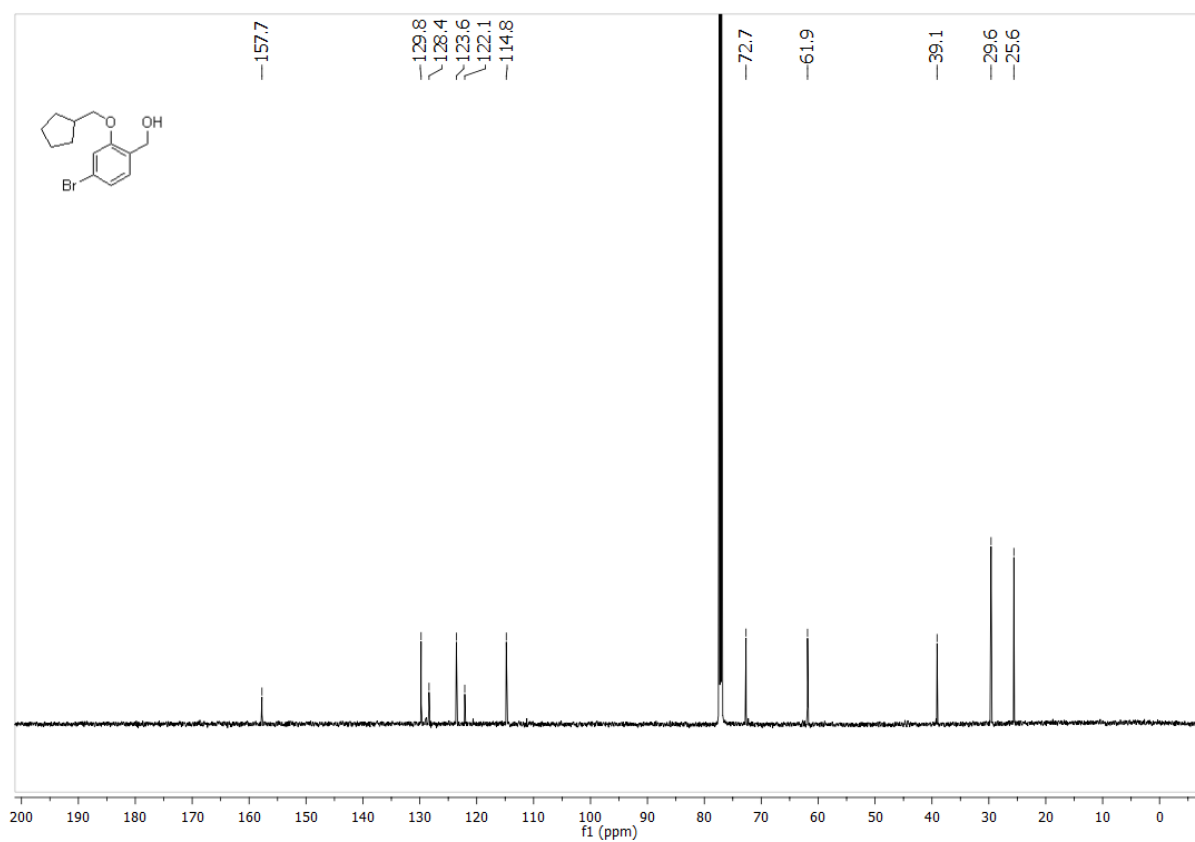

**1h. 3'-((5-bromo-2-(hydroxymethyl)phenoxy)methyl)-[1,1'-biphenyl]-3-carbonitrile**

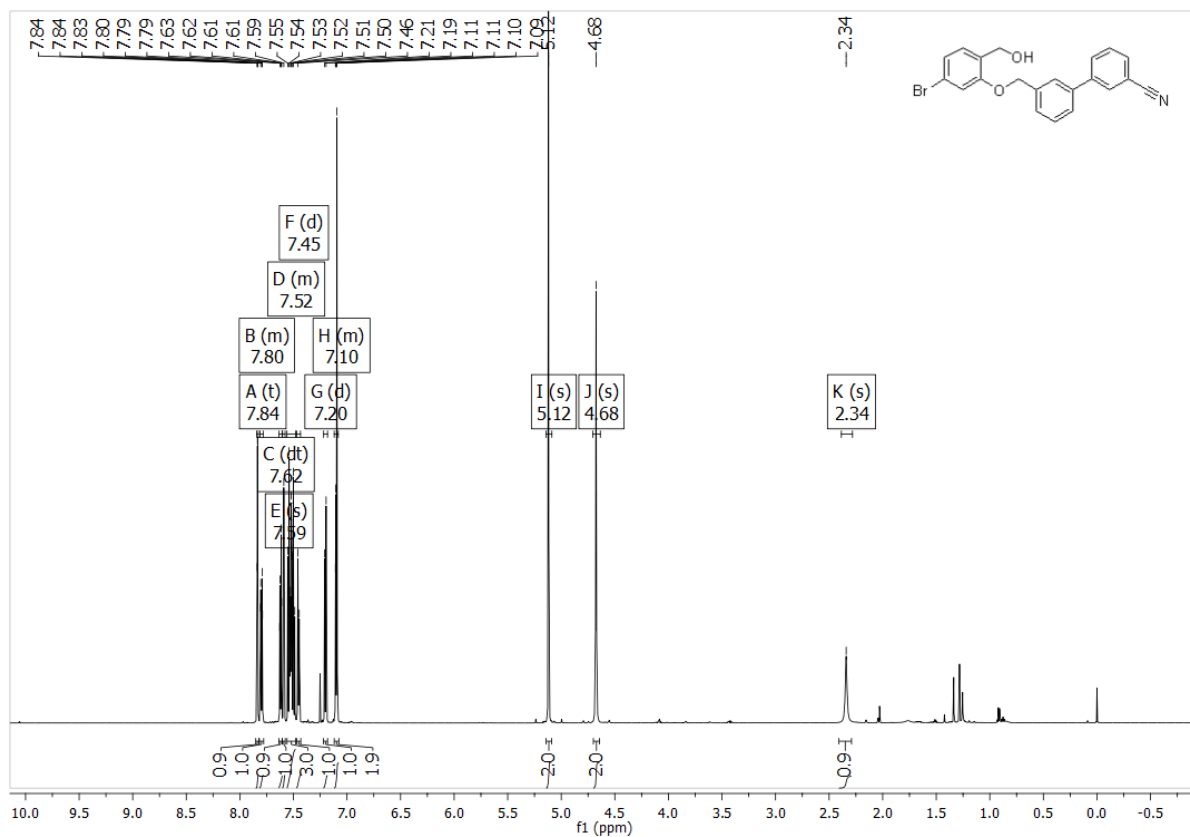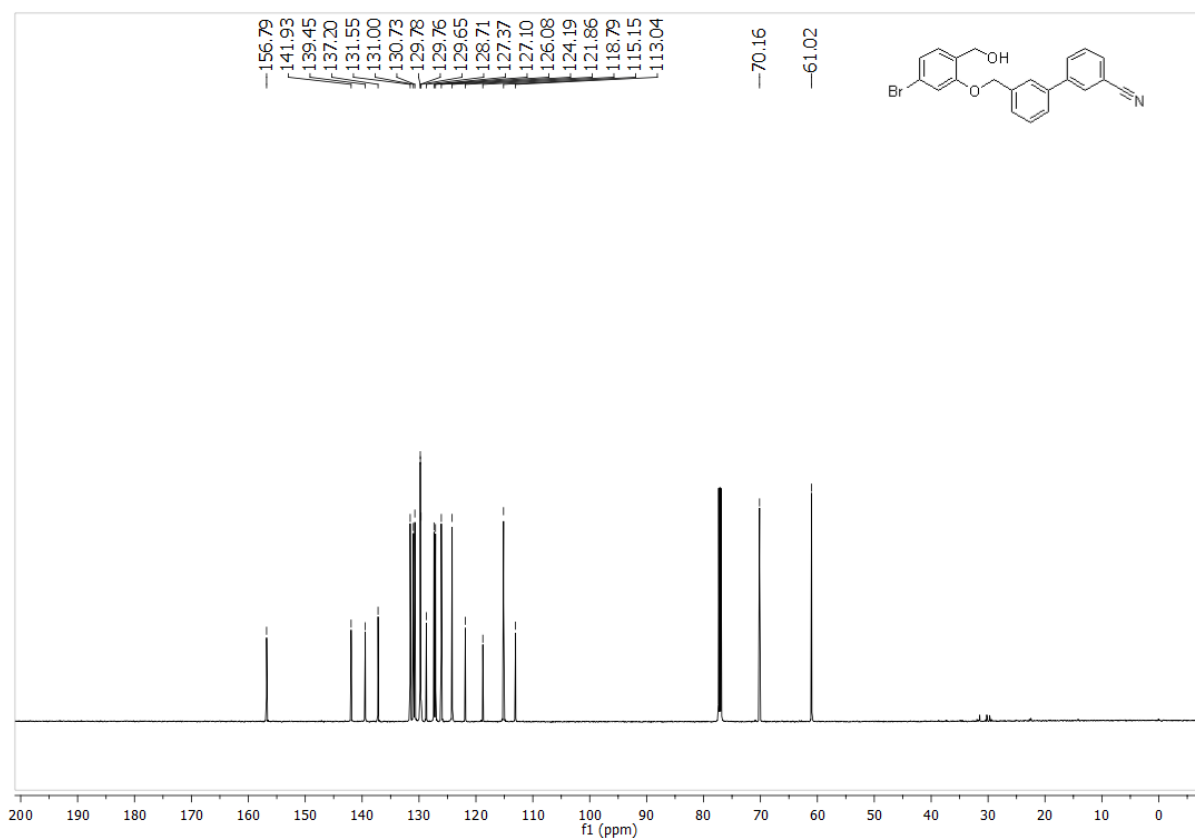

## ii. 3-((5-Bromo-2-(hydroxymethyl)phenoxy)methyl)benzonitrile

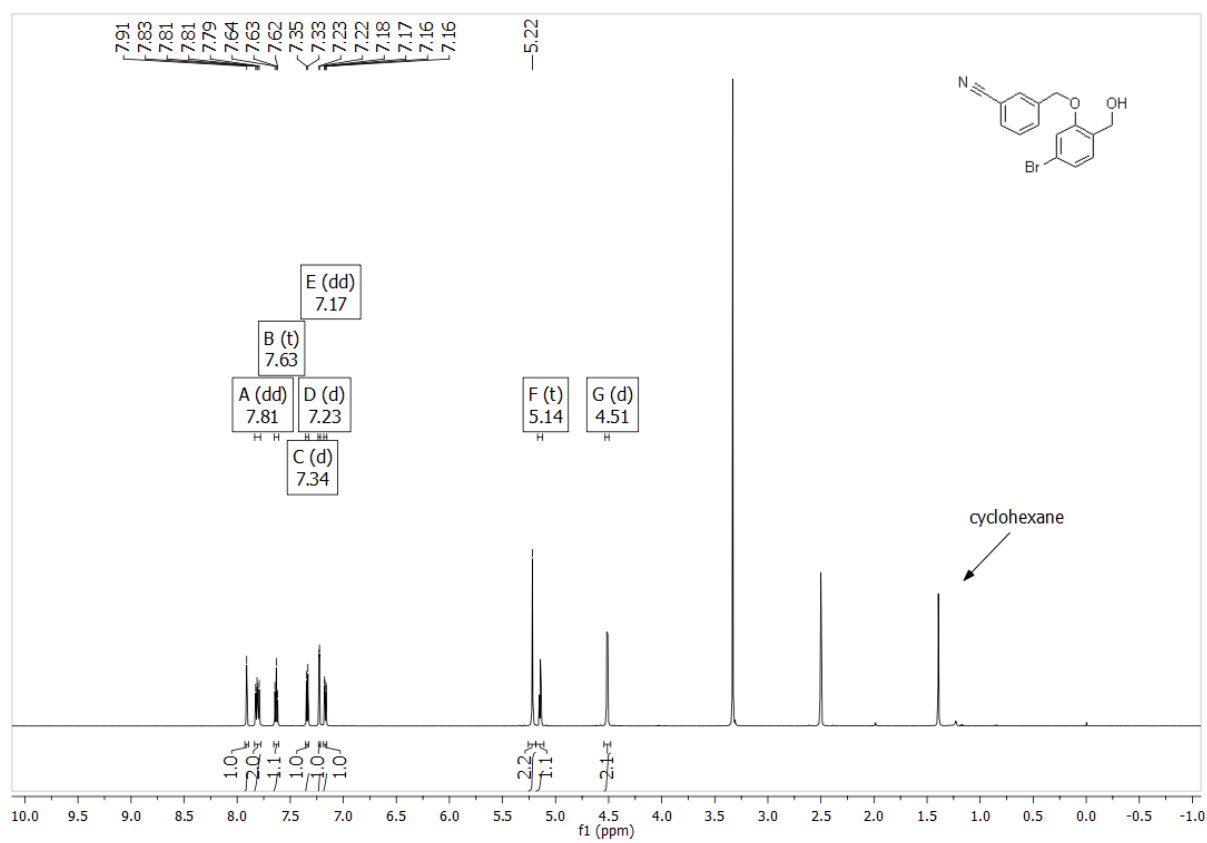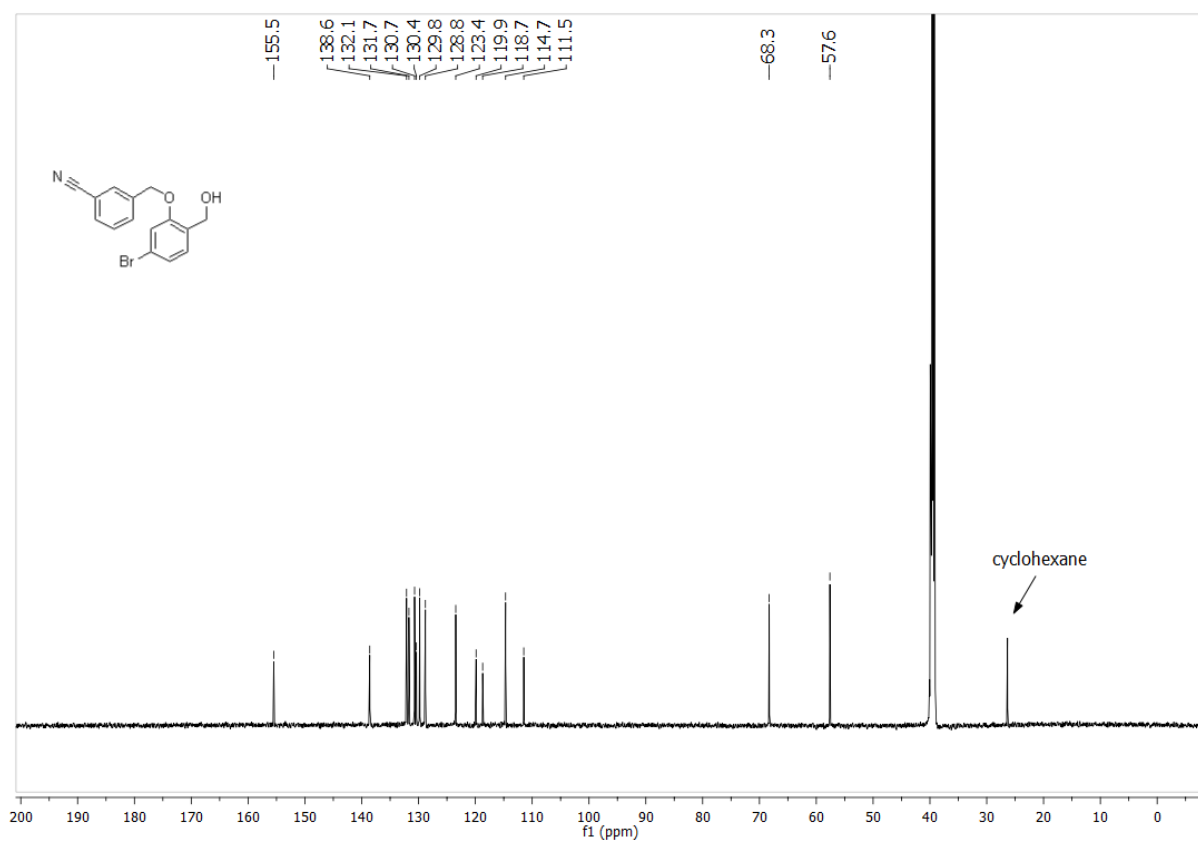

### 3a. (2-Methoxy-4-(4,4,5,5-tetramethyl-1,3,2-dioxaborolan-2-yl)phenyl)methanol

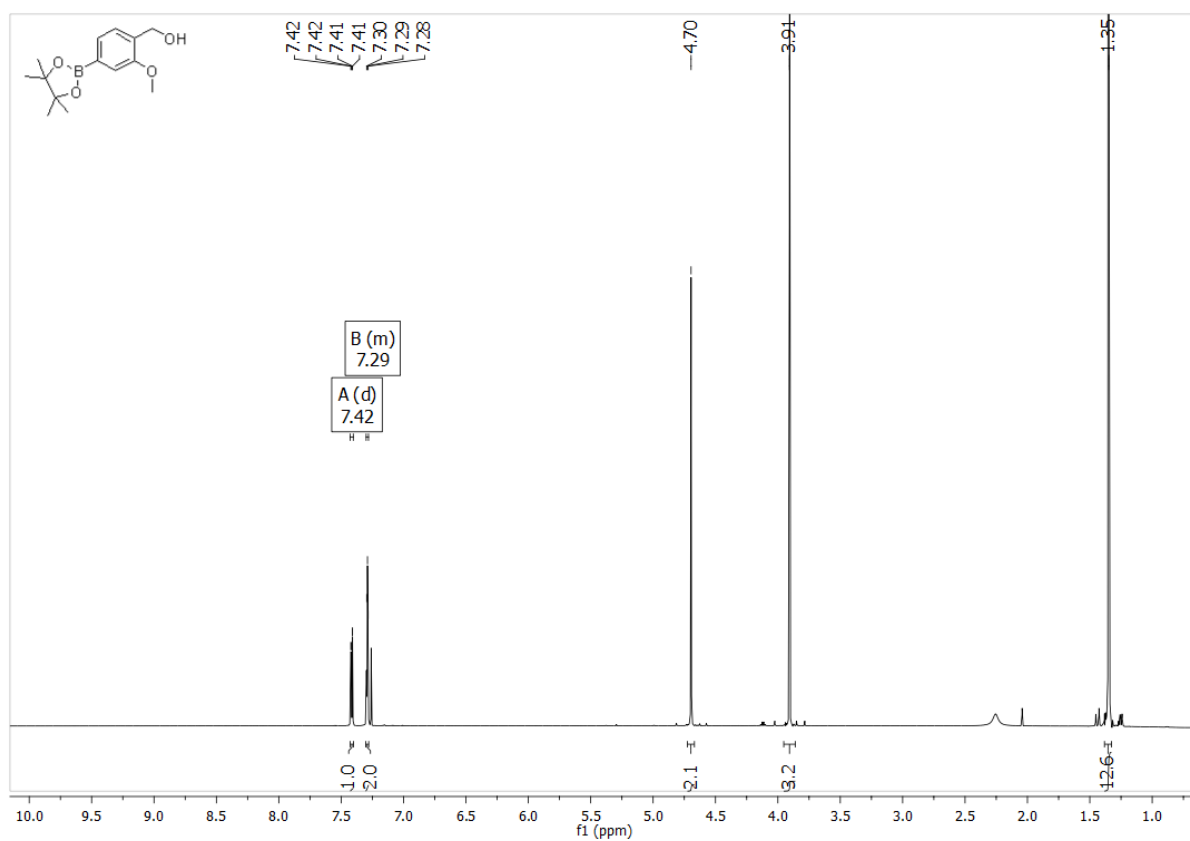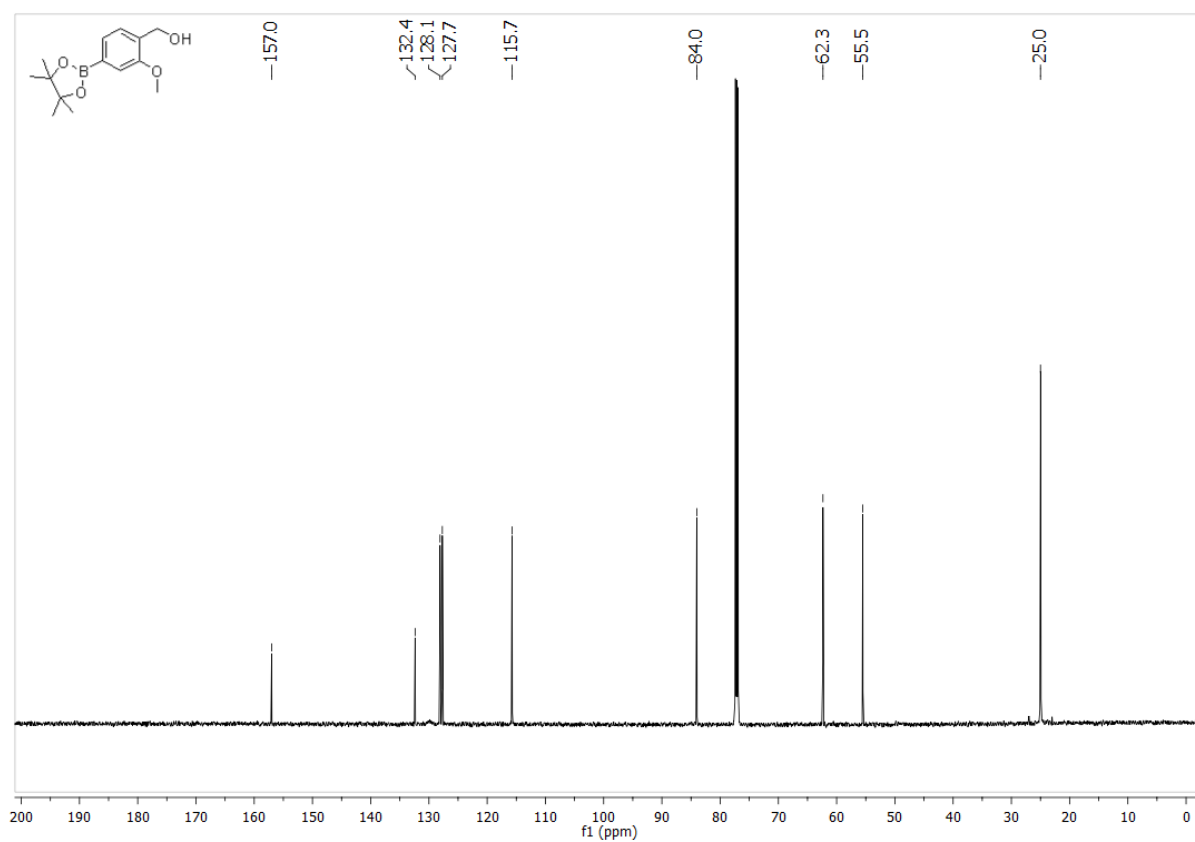

### 3b. (2-Ethoxy-4-(4,4,5,5-tetramethyl-1,3,2-dioxaborolan-2-yl)phenyl)methanol

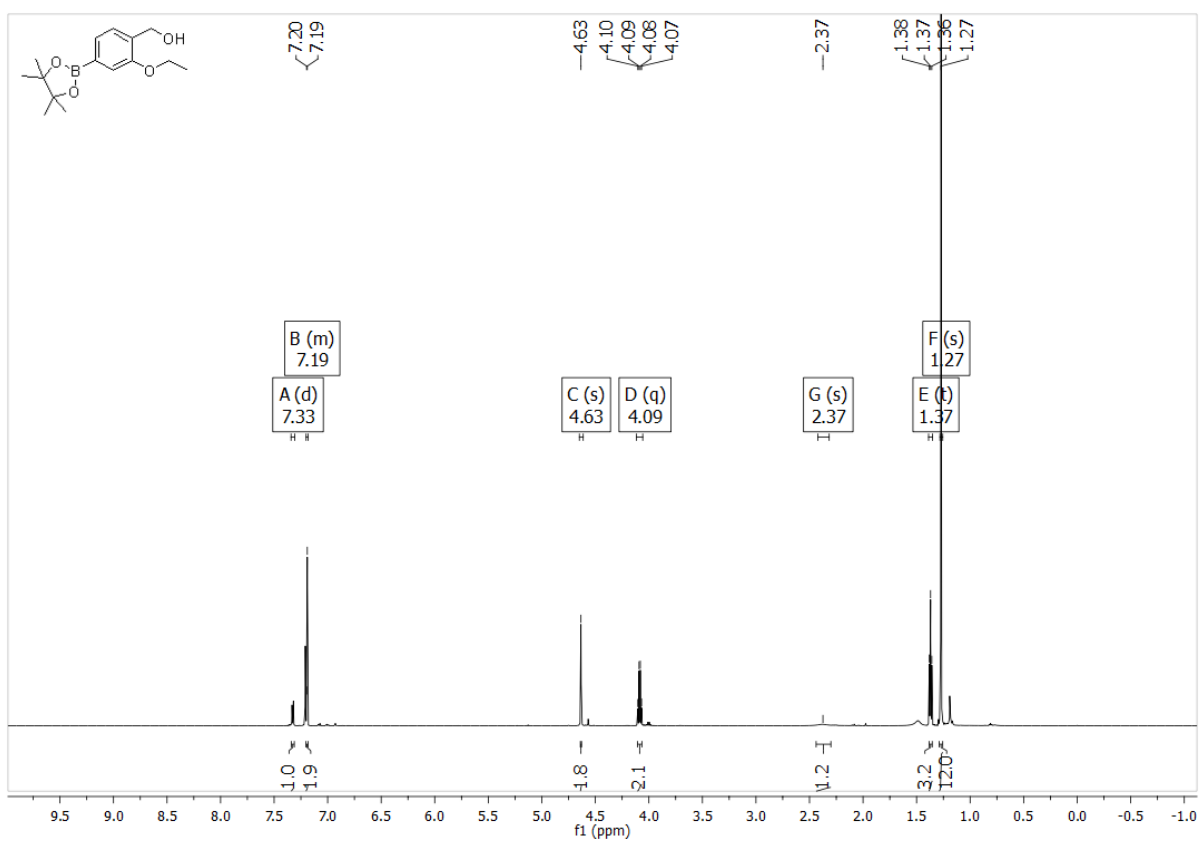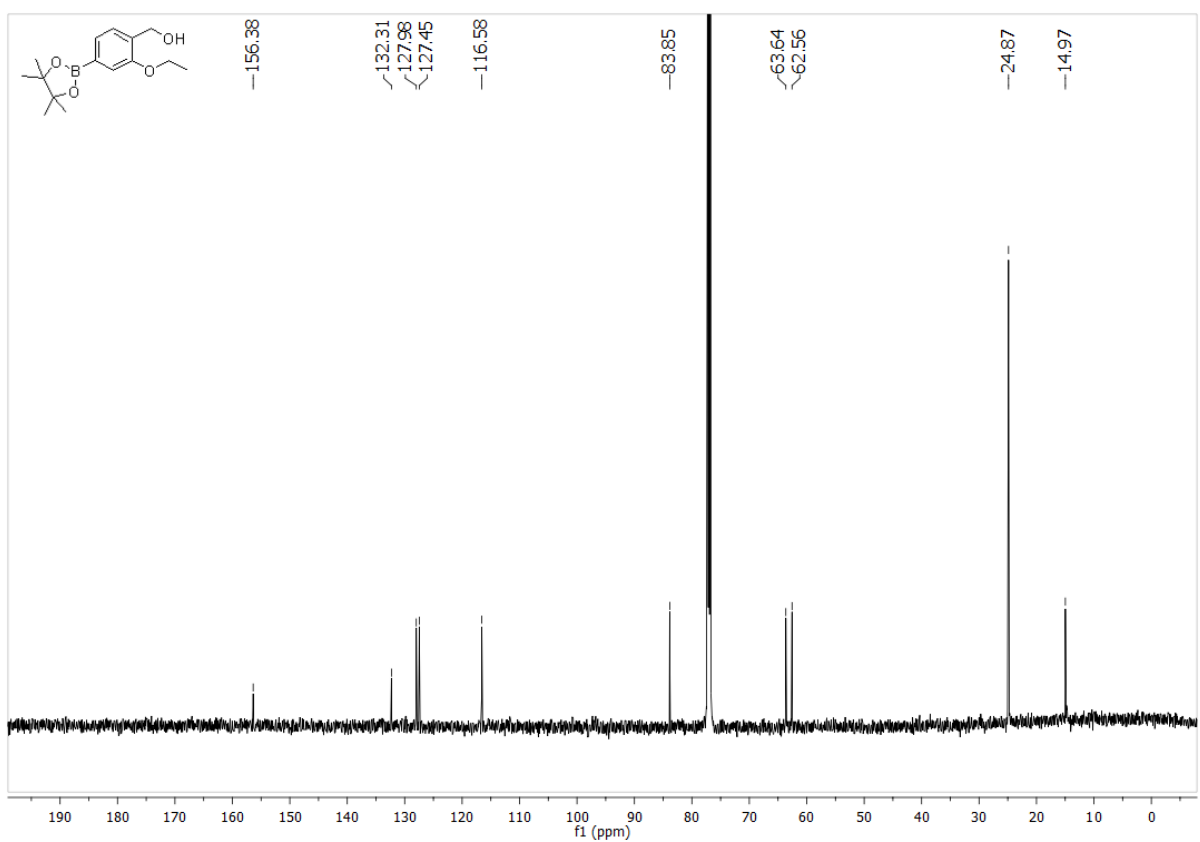

**3c. (2-Isopropoxy-4-(4,4,5,5-tetramethyl-1,3,2-dioxaborolan-2-yl)phenyl)methanol**

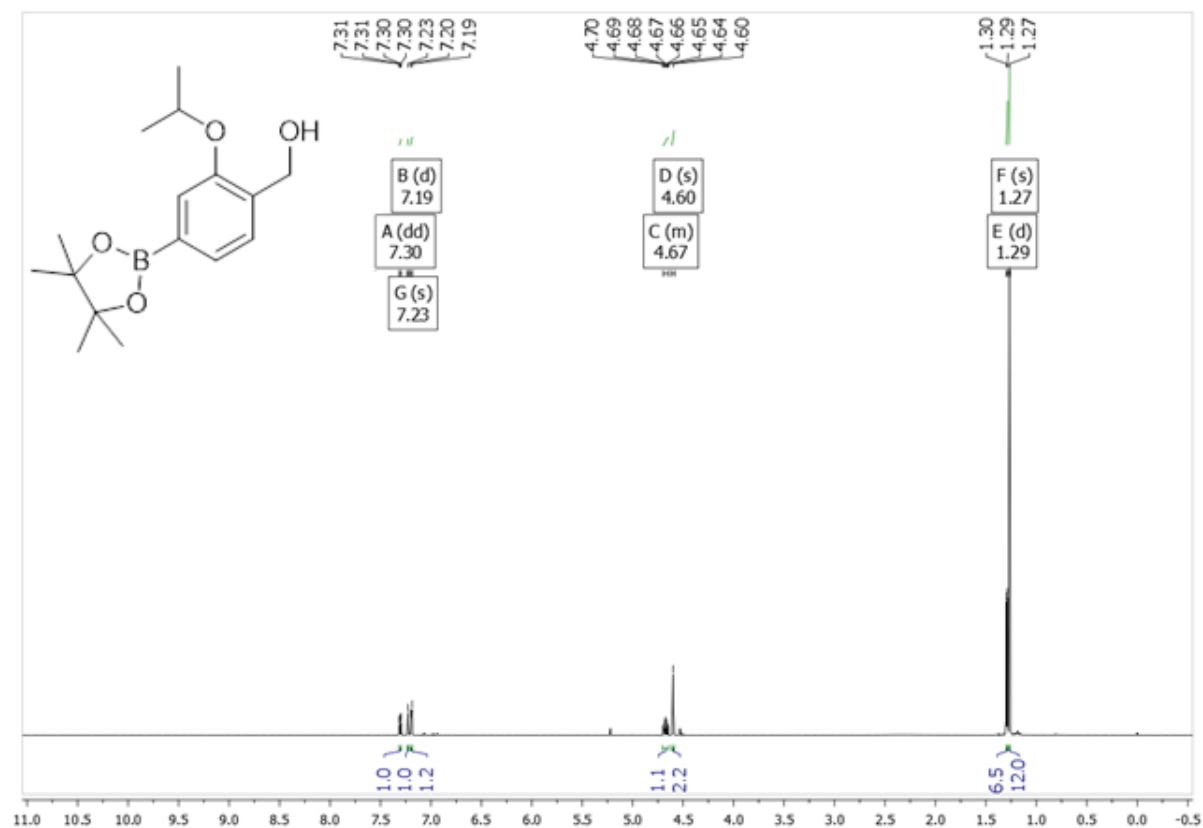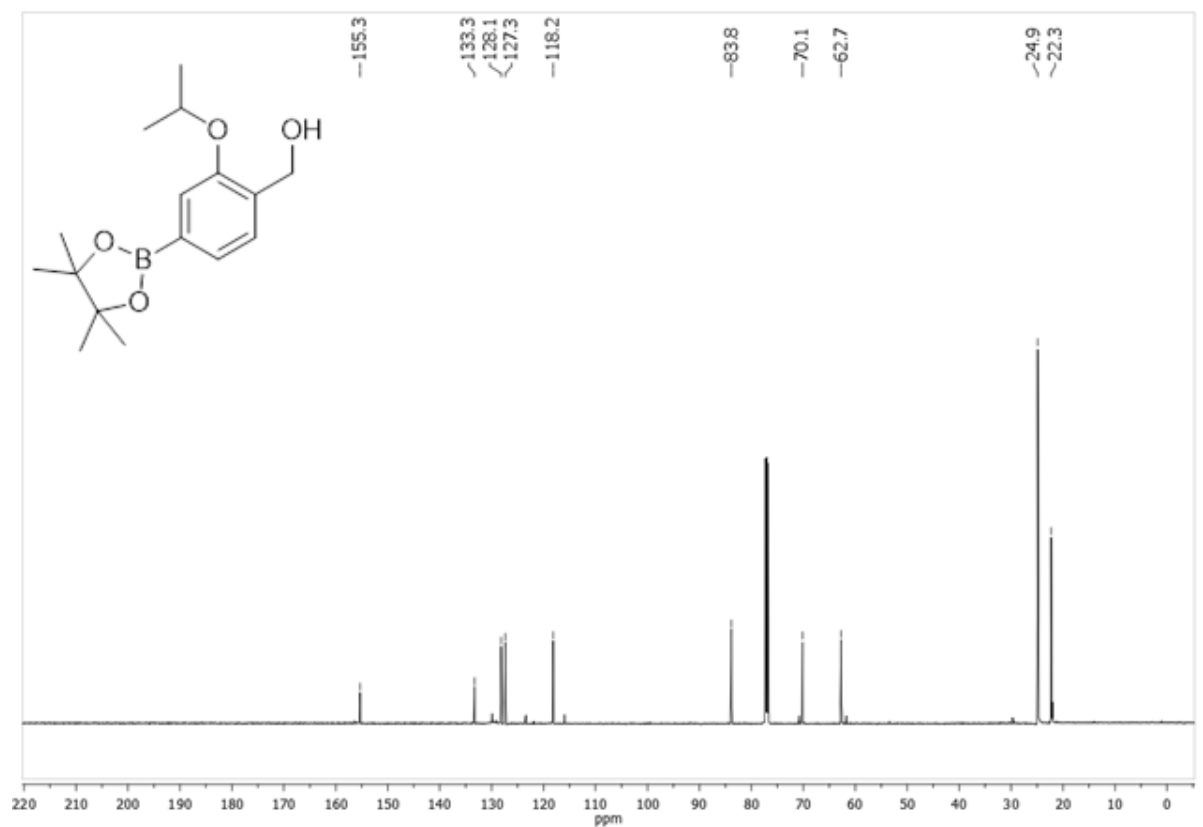

**3d. (2-Isopentoxy-4-(4,4,5,5-tetramethyl-1,3,2-dioxaborolan-2-yl)phenyl)methanol**

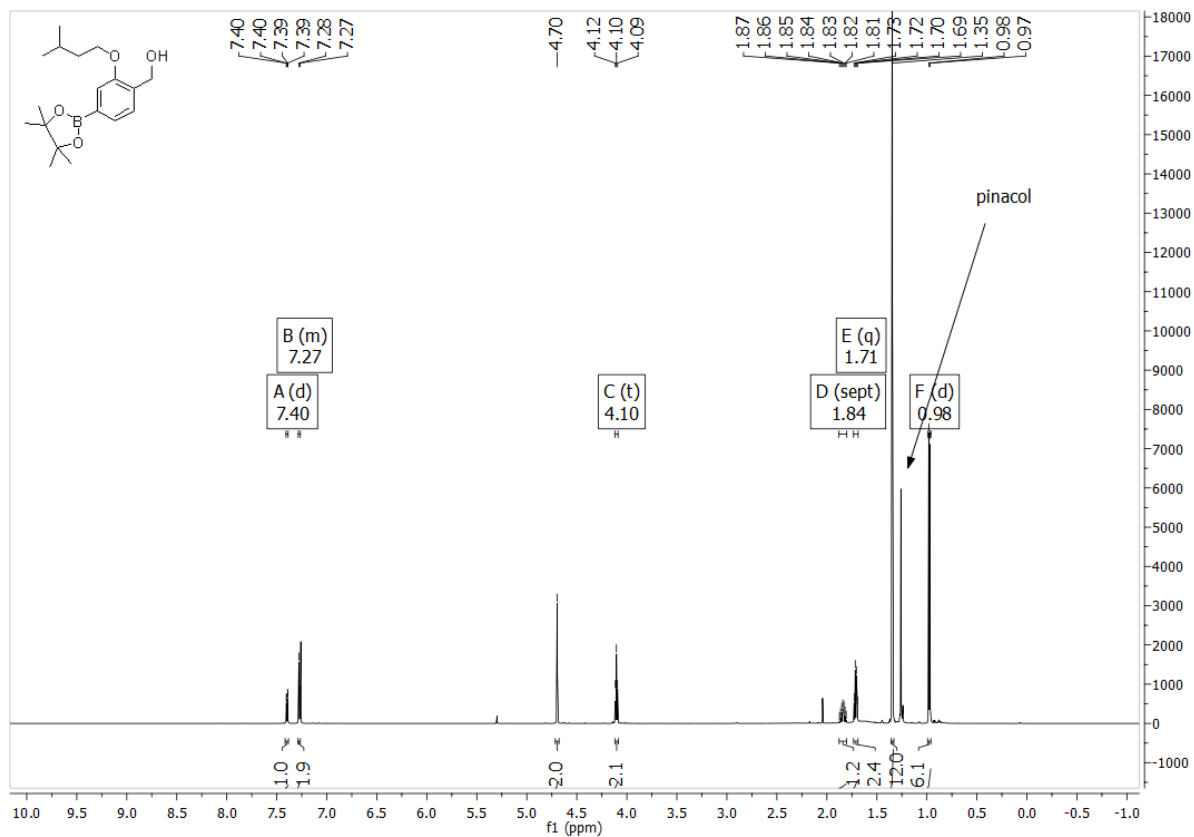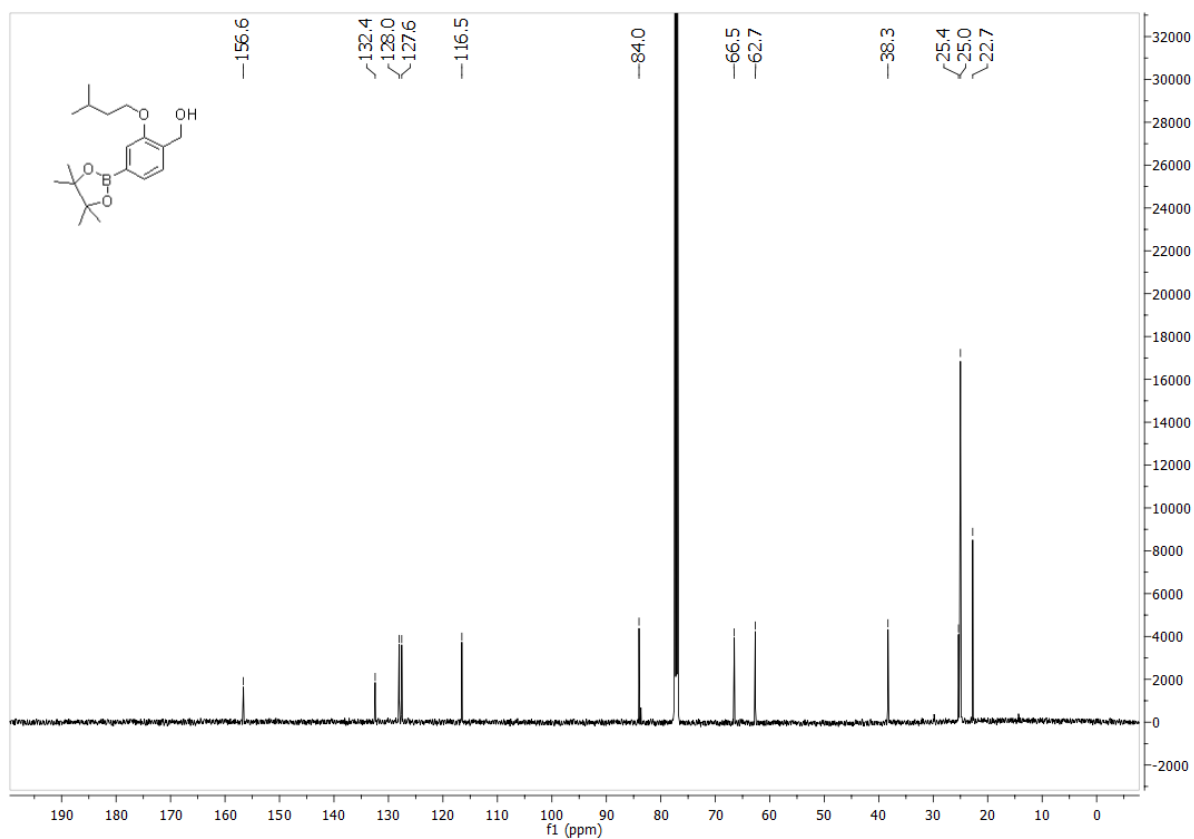

**3e. 2-(2-Hydroxymethyl)-5-(4,4,5,5-tetramethyl-1,3,2-dioxaborolan-2-yl)phenoxy)acetonitrile**

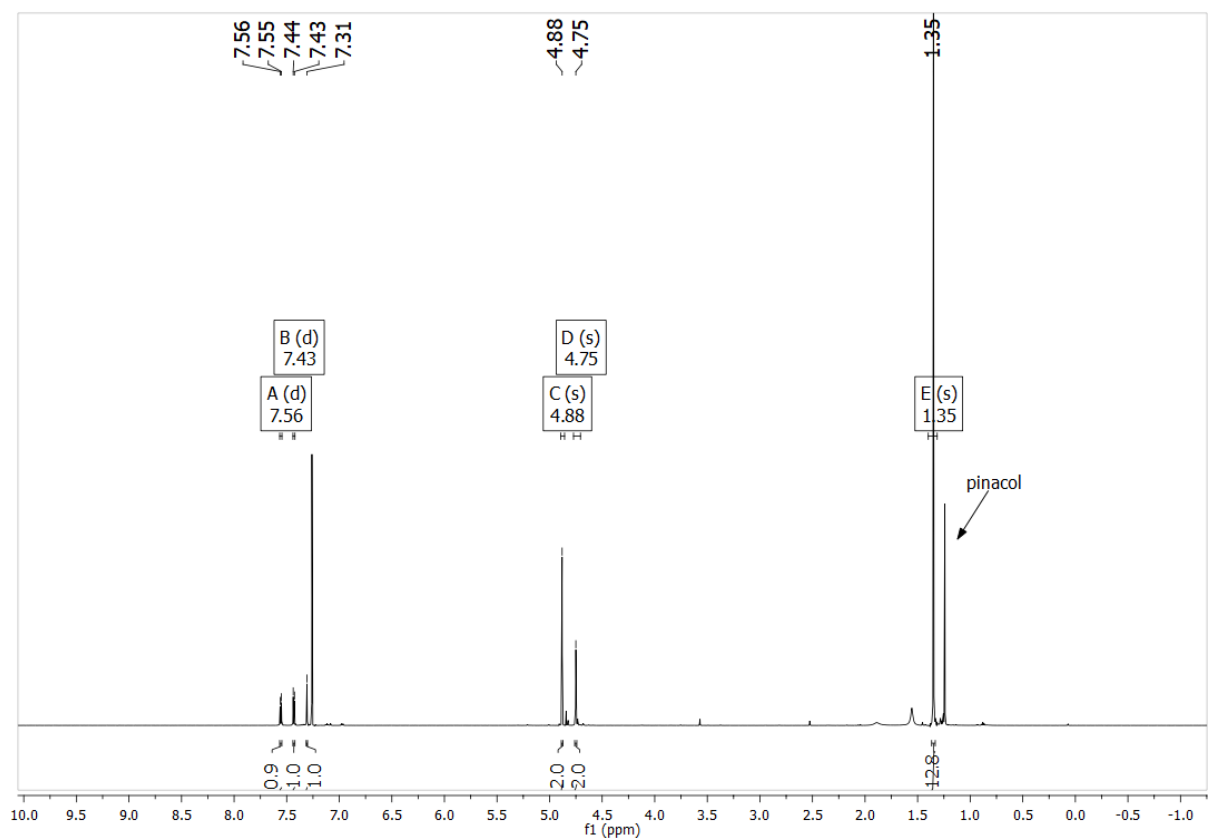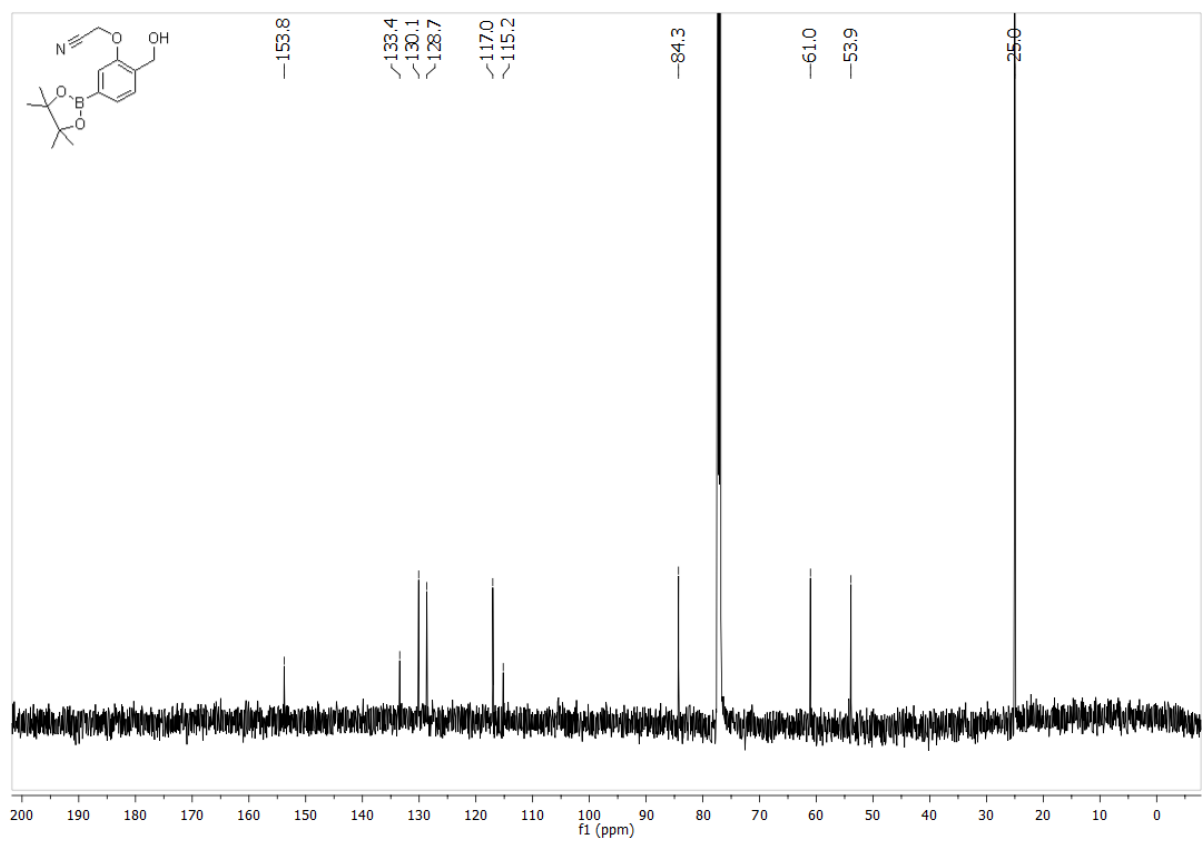



**3f. (2-(Cyclobutylmethoxy)-4-(4,4,5,5-tetramethyl-1,3,2-dioxaborolan-2-yl)phenyl)methanol**

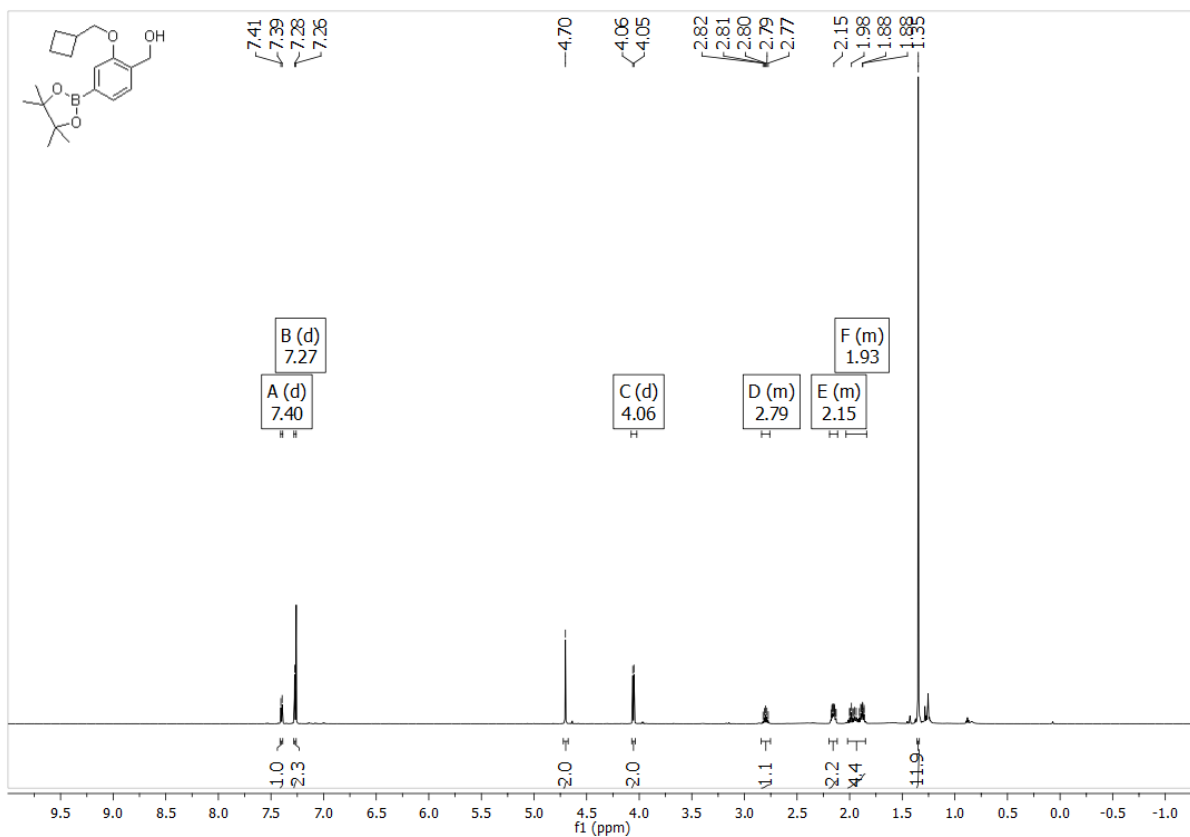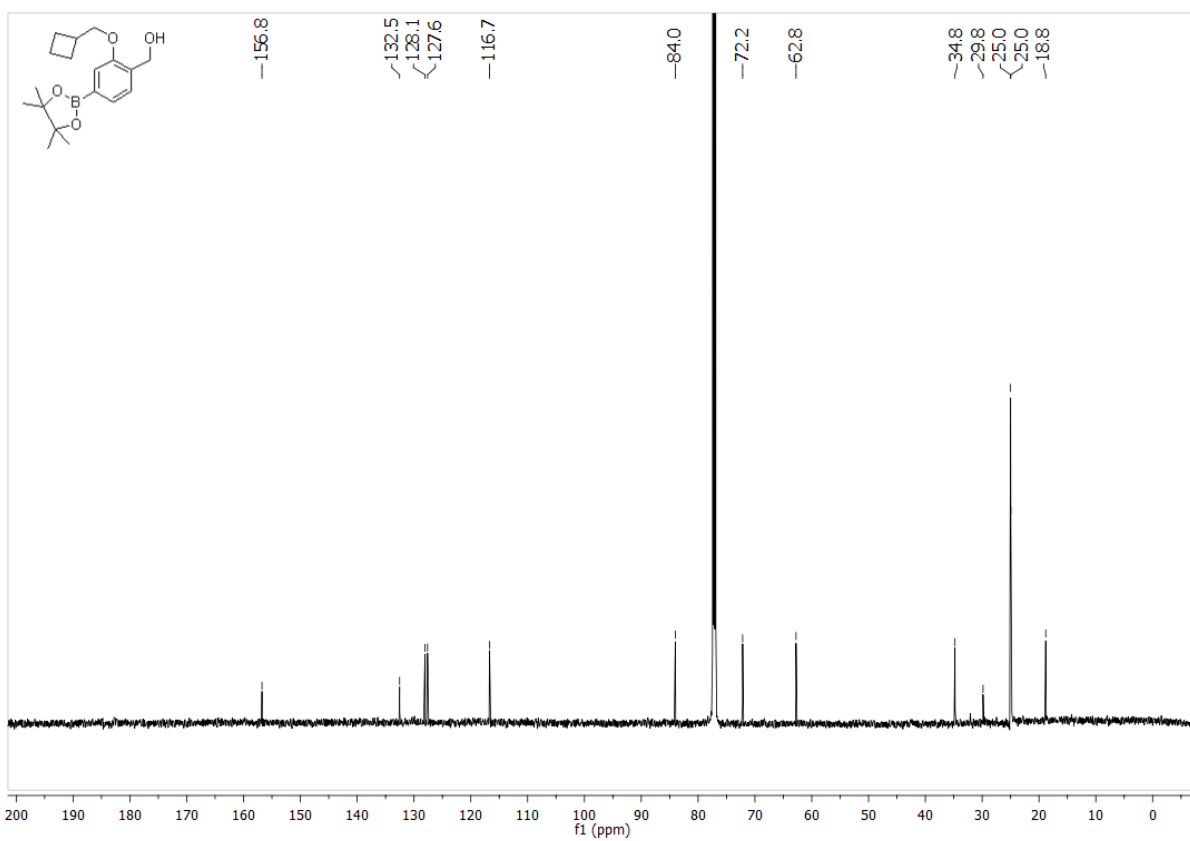

**3g. (2-(Cyclopentylmethoxy)-4-(4,4,5,5-tetramethyl-1,3,2-dioxaborolan-2-yl)phenyl)methanol**

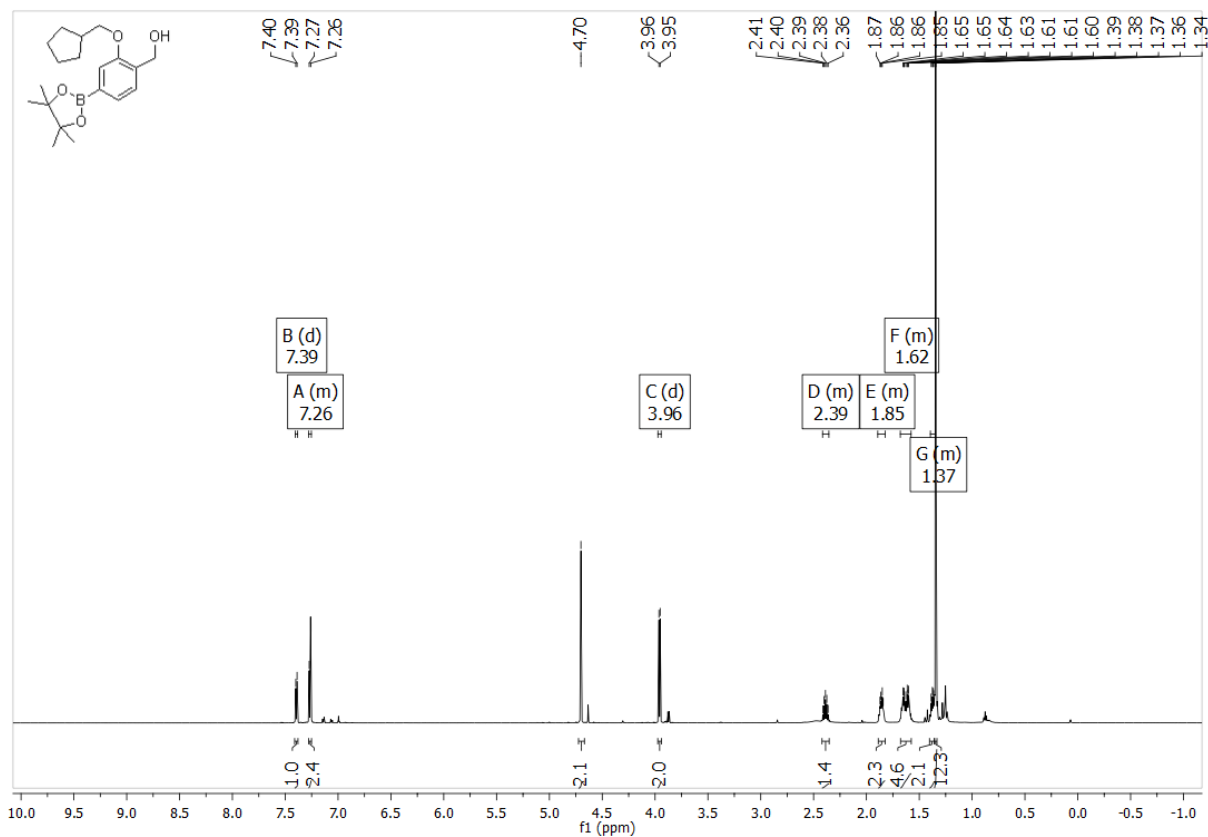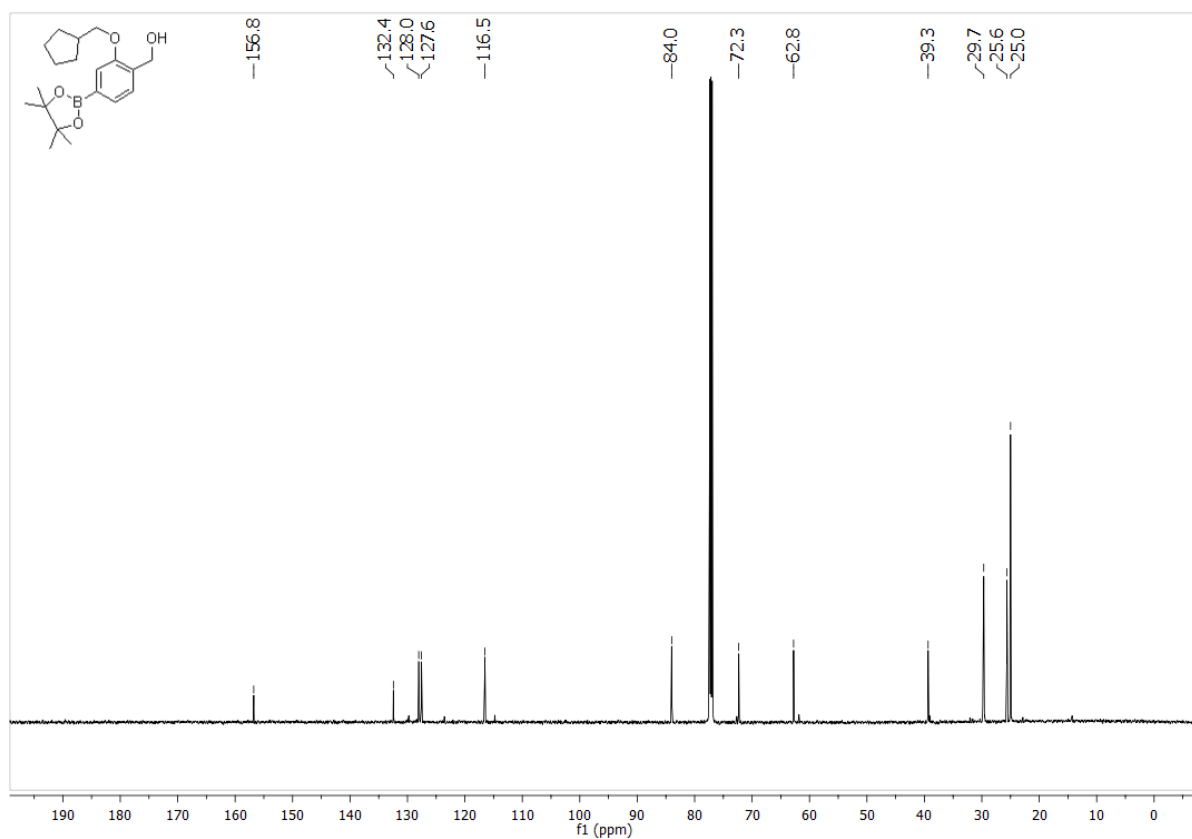

**3h. 3'-((2-(Hydroxymethyl)-5-(4,4,5,5-tetramethyl-1,3,2-dioxaborolan-2-yl)phenoxy)methyl)-[1,1'-biphenyl]-3-carbonitrile**

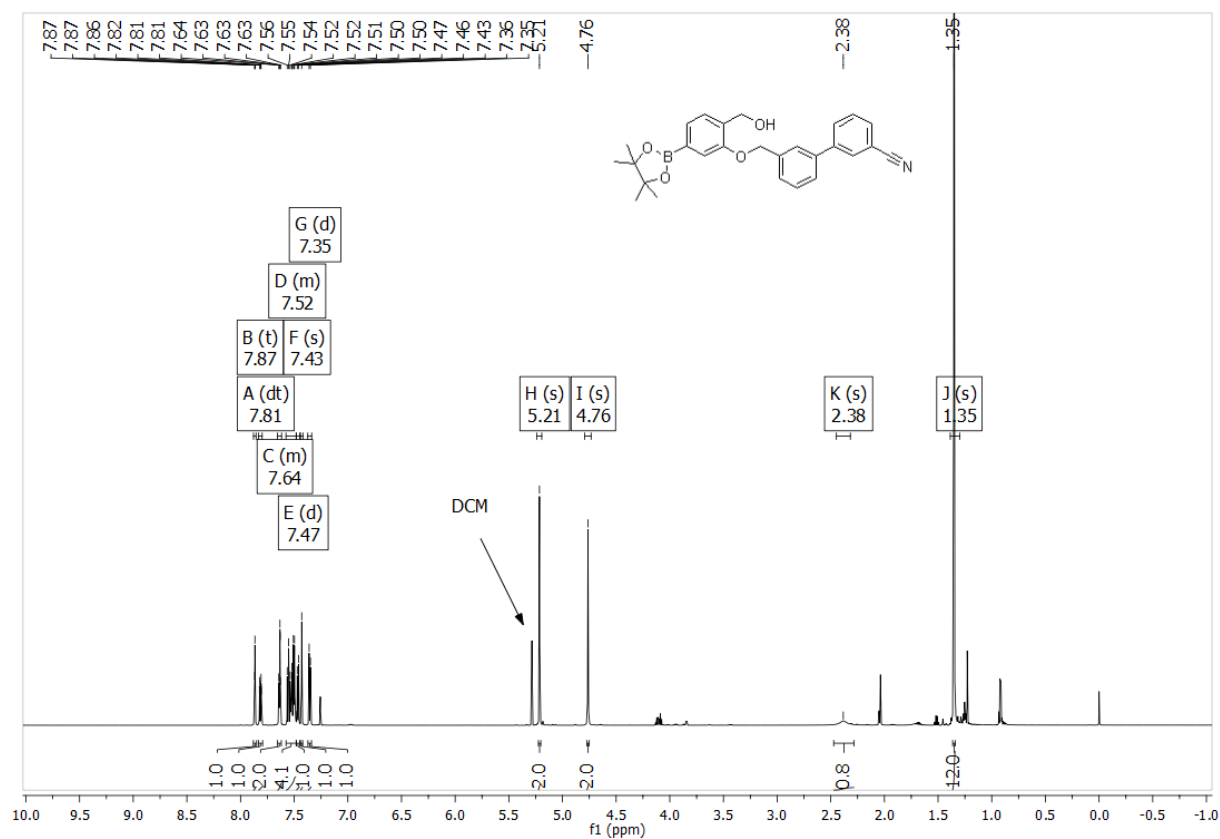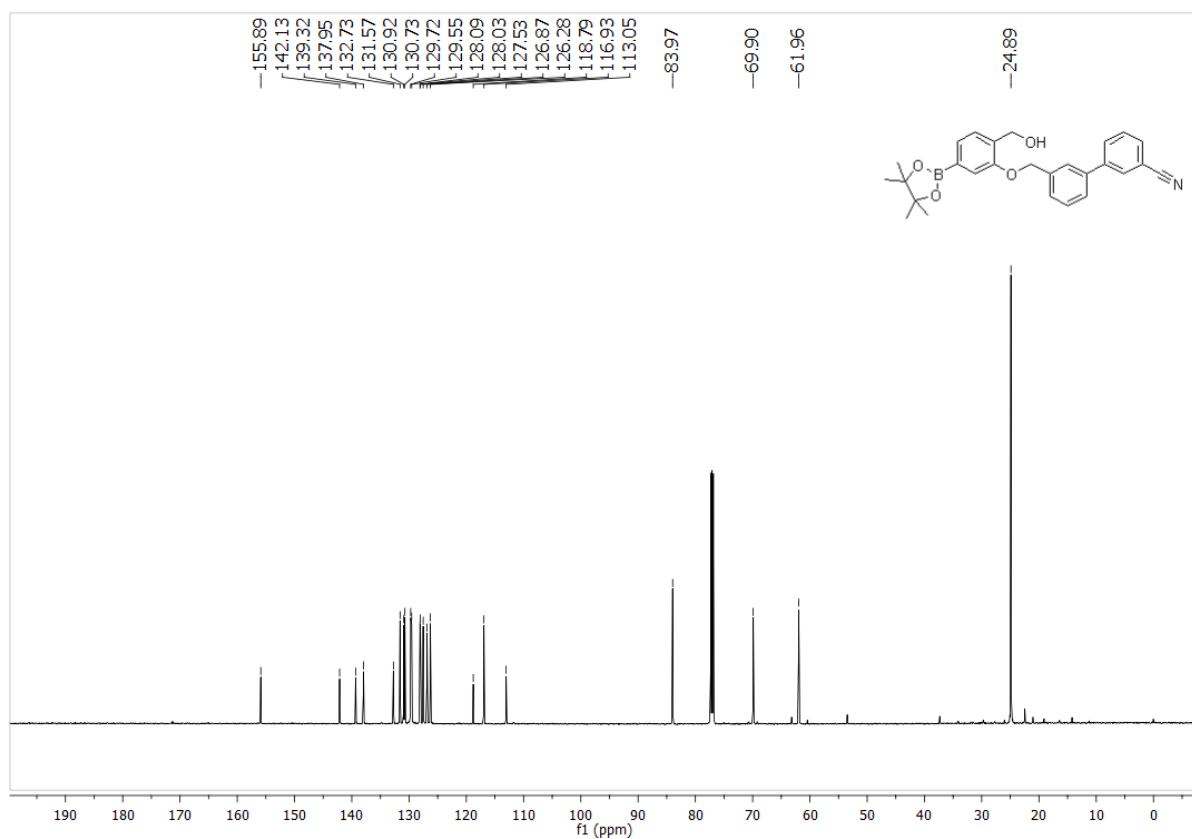

**3i. 3-((2-(Hydroxymethyl)-5-(4,4,5,5-tetramethyl-1,3,2-dioxaborolan-2-yl)phenoxy)methyl)benzonitrile**

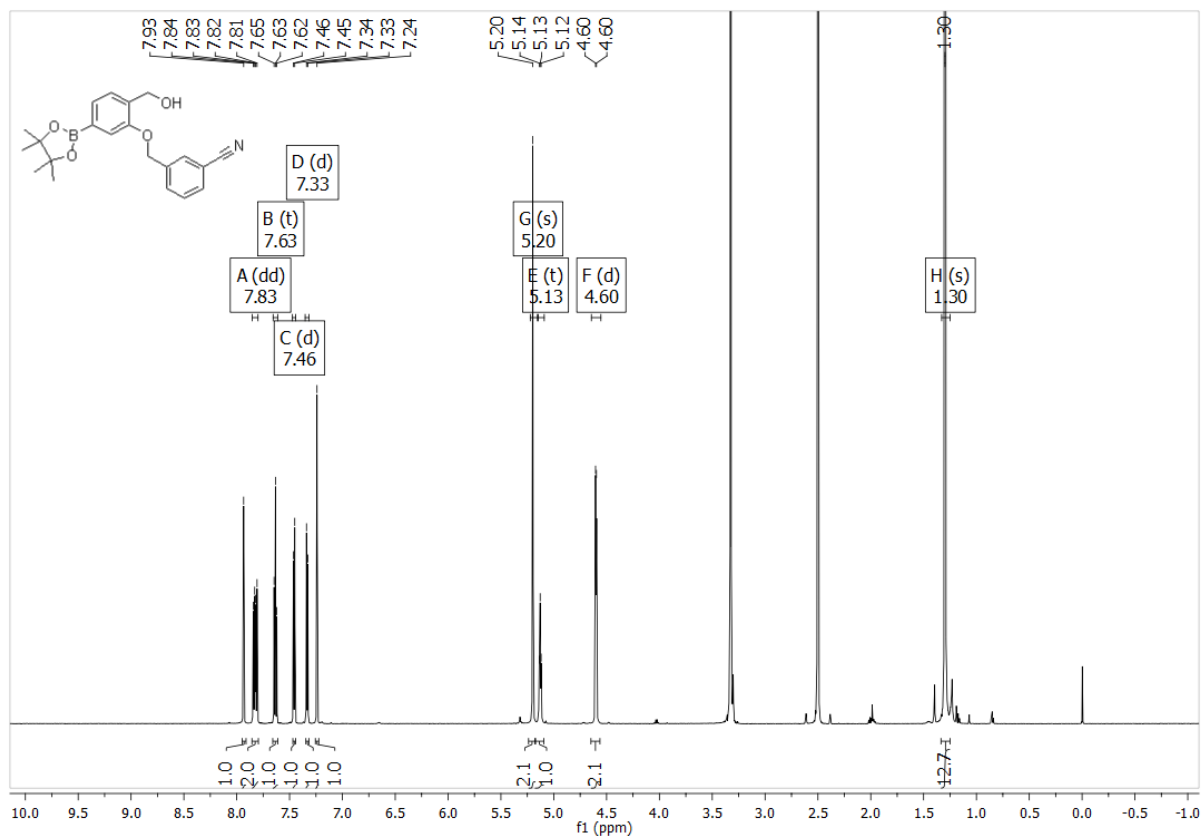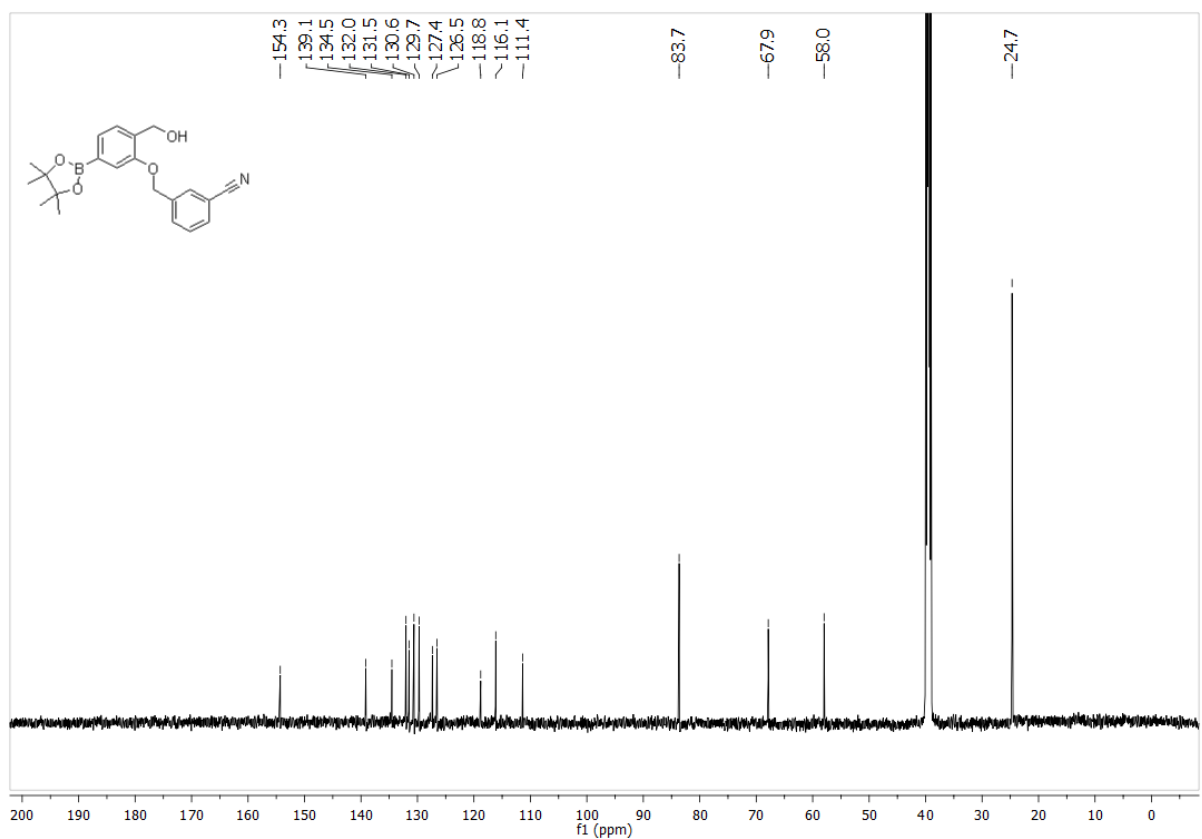

4a. (3'-(Benzo-1,4-dioxan-6-yl)-2'-methyl-[1,1'-biphenyl]-4-yl)methanol

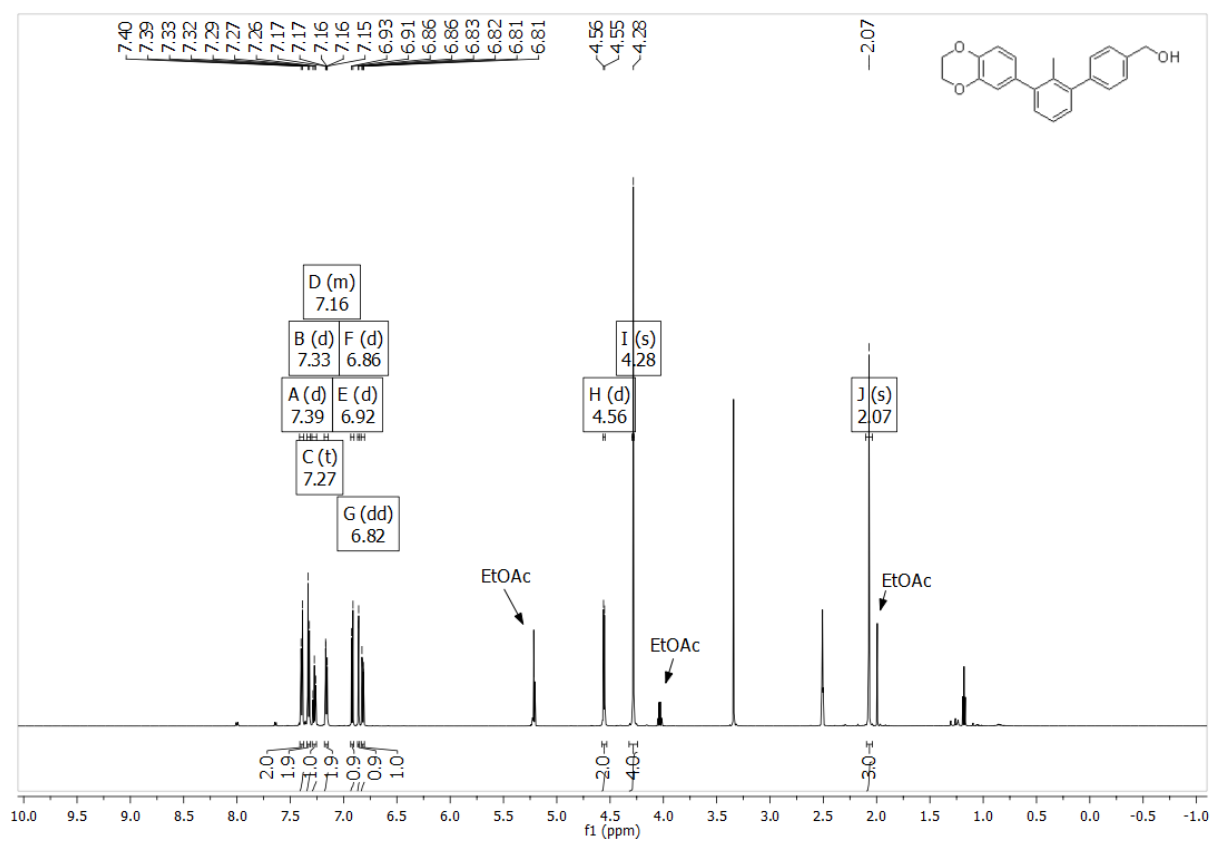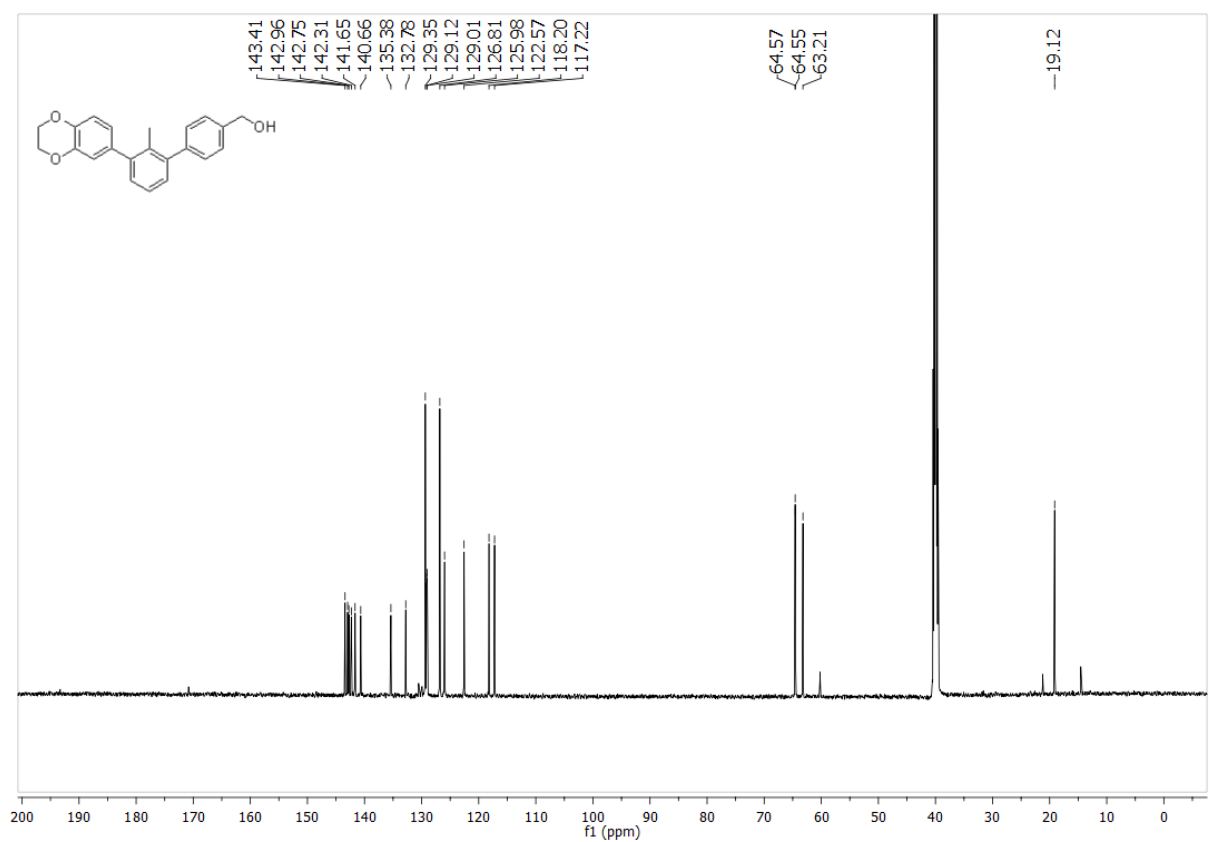

4b. (3'-(Benzo-1,4-dioxan-6-yl)-2'-methyl-[1,1'-biphenyl]-3-yl)methanol

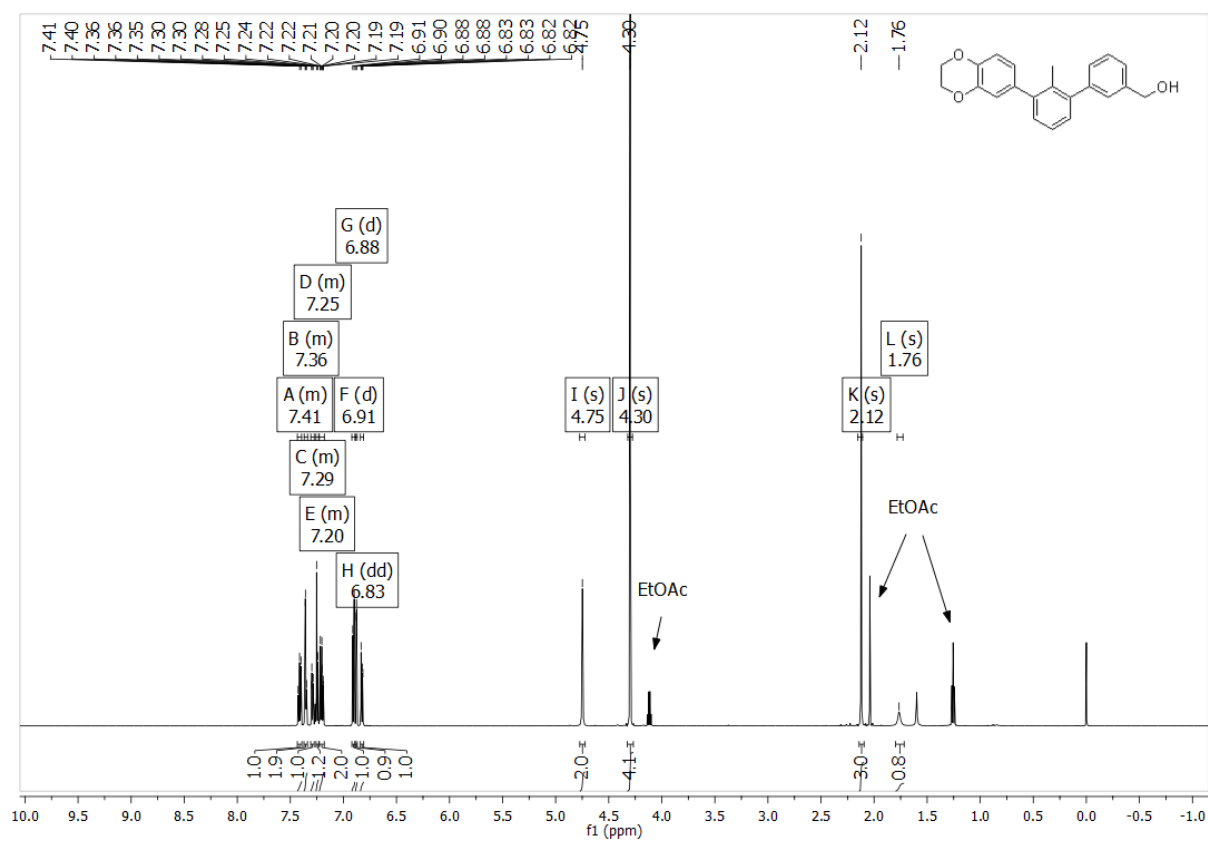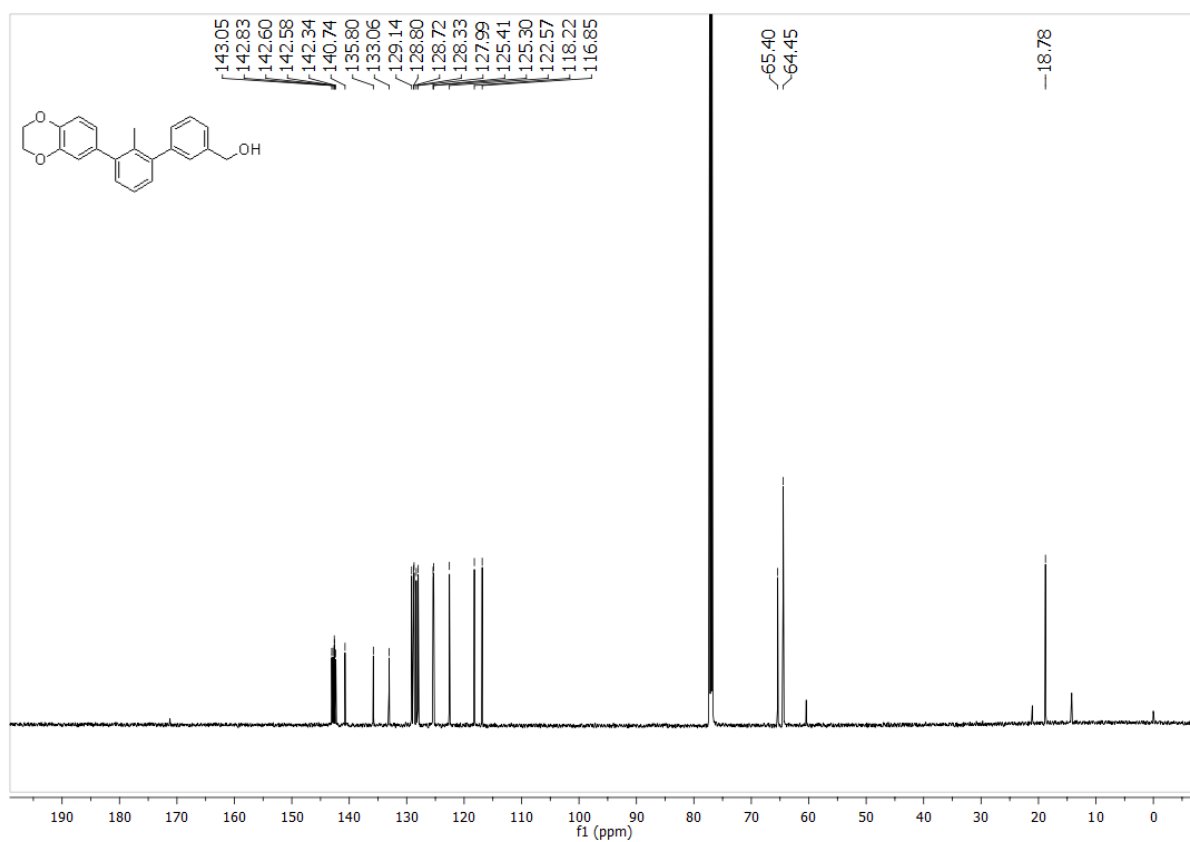

4c. (3'-(Benzo-1,4-dioxan-6-yl)-2'-methyl-[1,1'-biphenyl]-2-yl)methanol

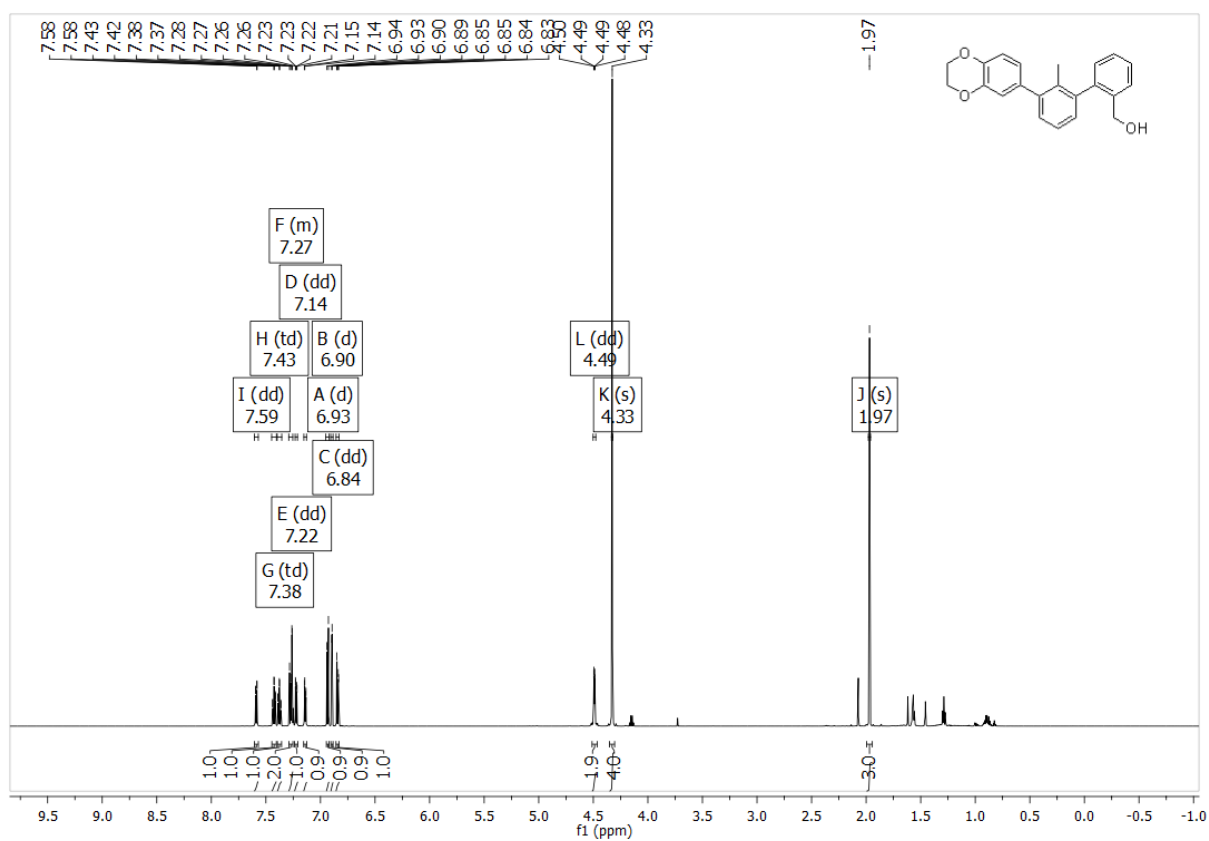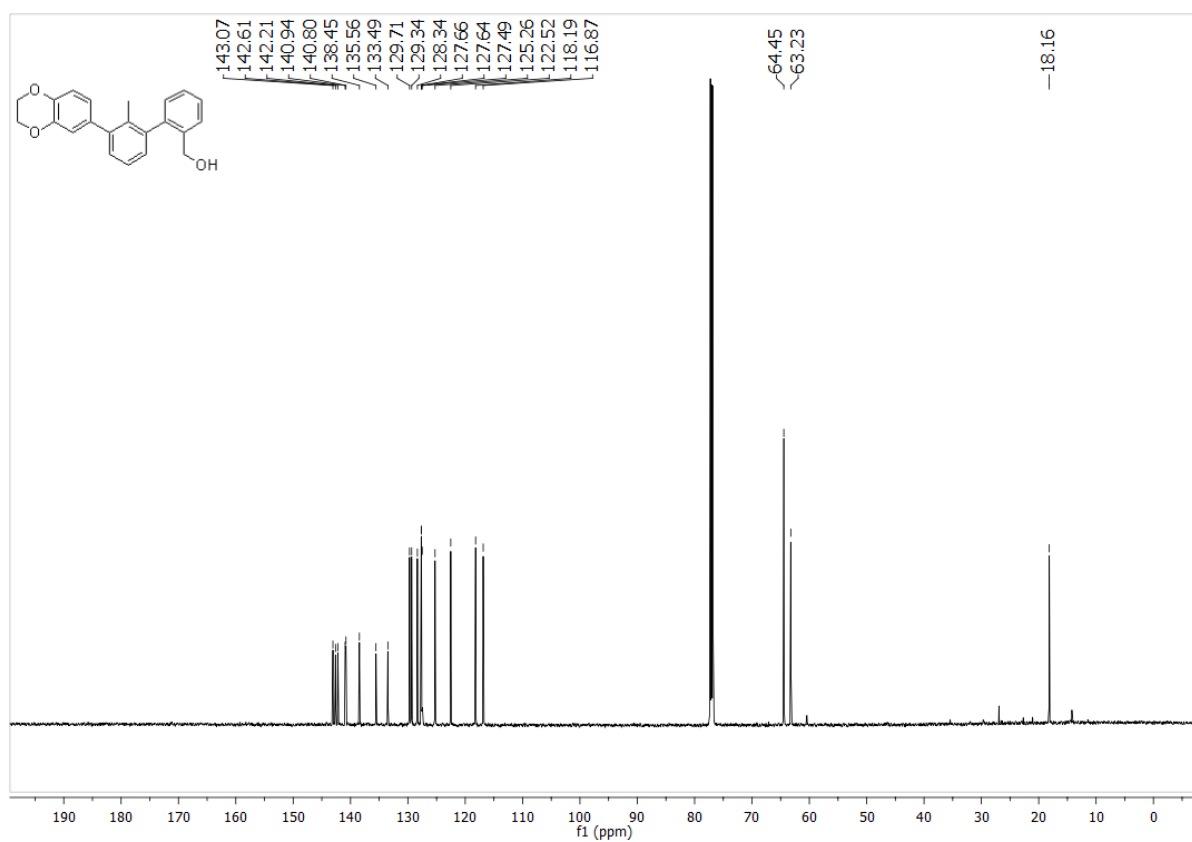

4d. (2'-Amino-3'-(benzo-1,4-dioxan-6-yl)-[1,1'-biphenyl]-4-yl)methanol

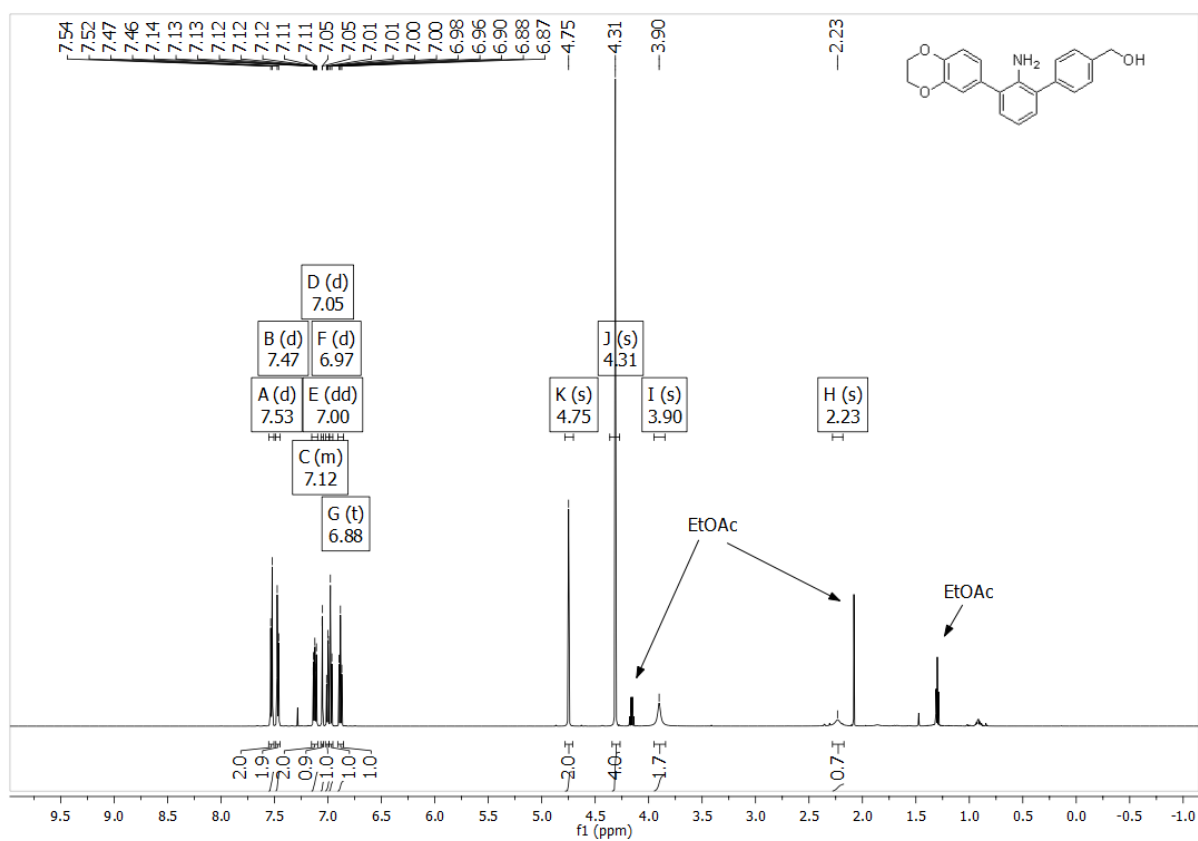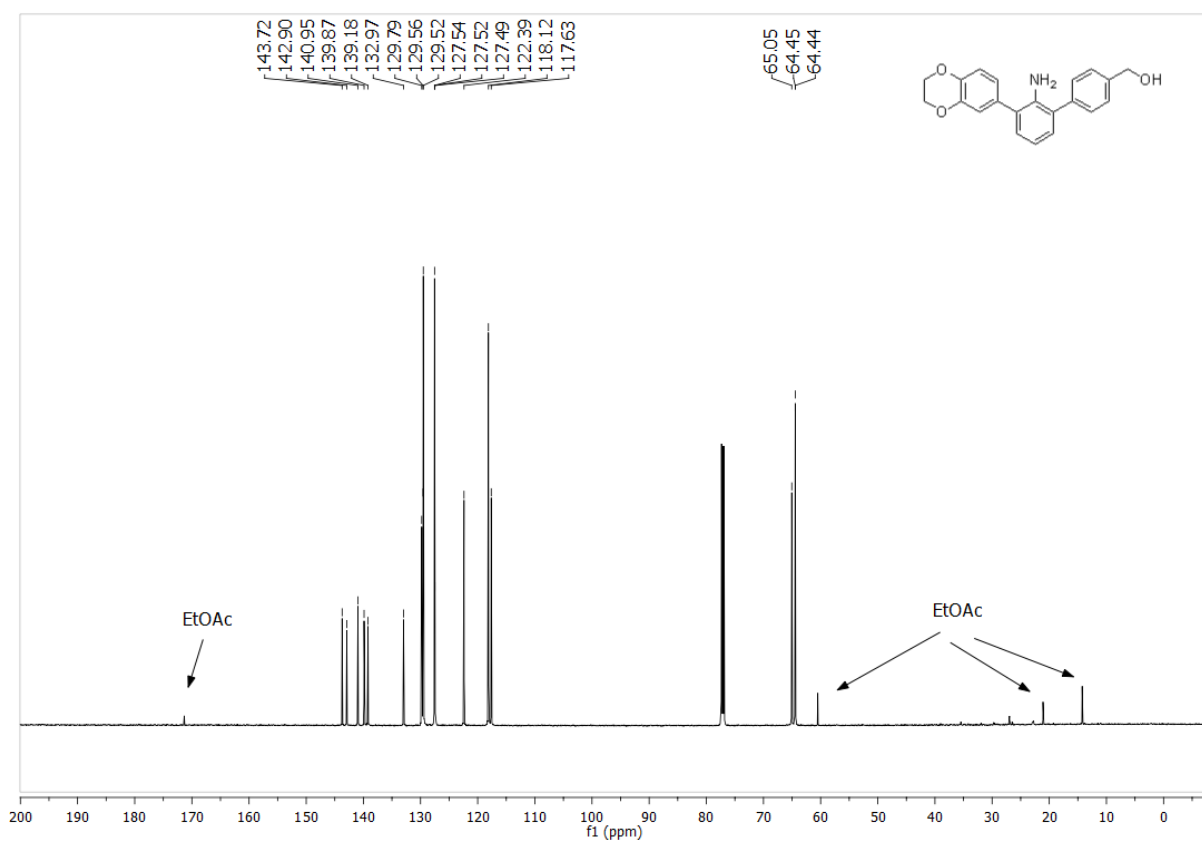



4e. (3'-(Benzo-1,4-dioxan-6-yl)-2'-chloro-[1,1'-biphenyl]-4-yl)methanol

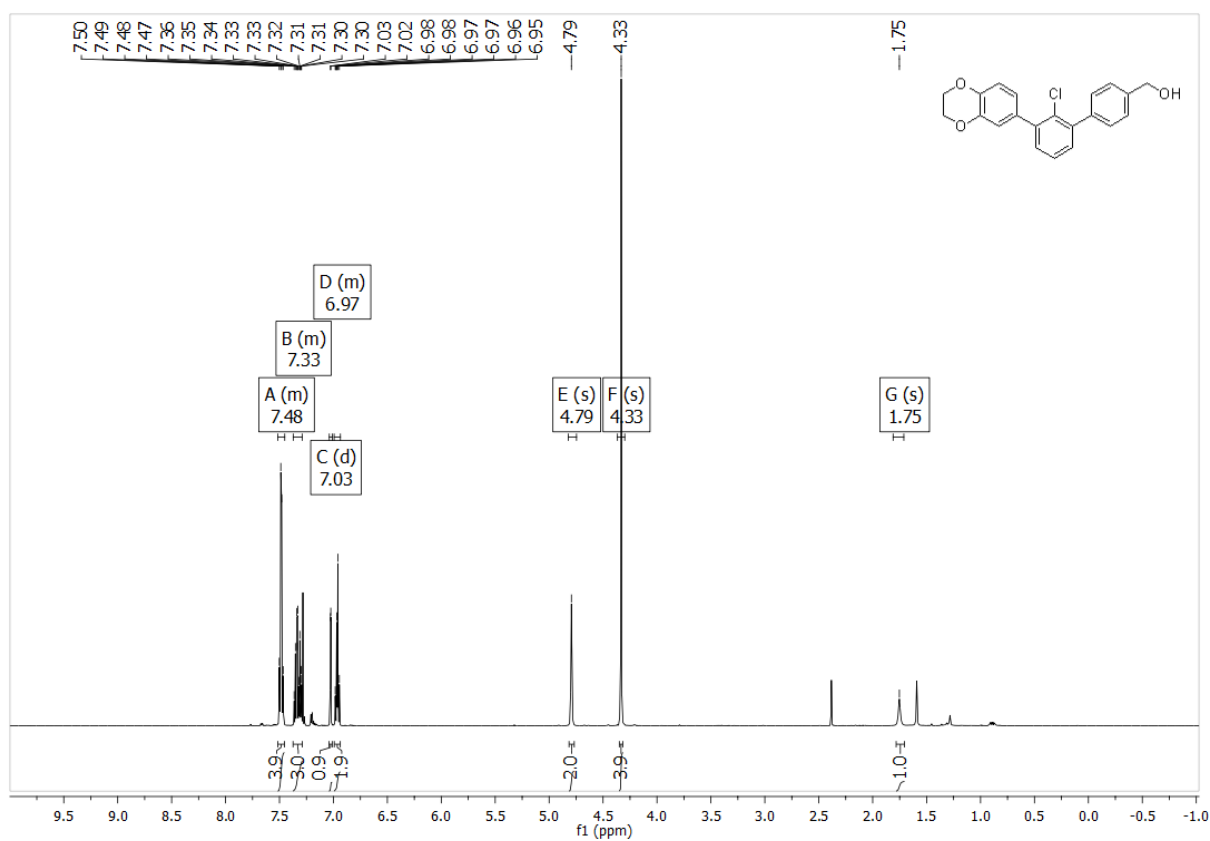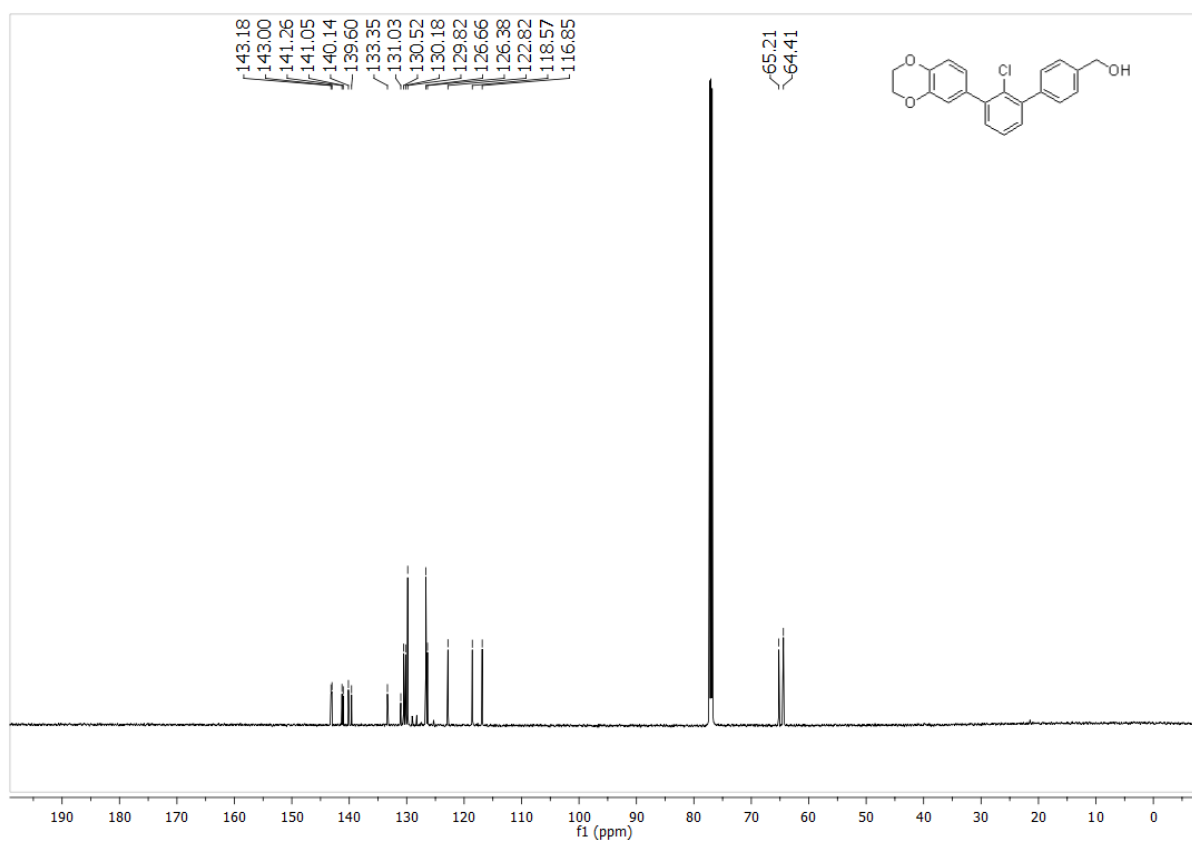

4f. (2'-Bromo-3'-(benzo-1,4-dioxan-6-yl)-[1,1'-biphenyl]-4-yl)methanol

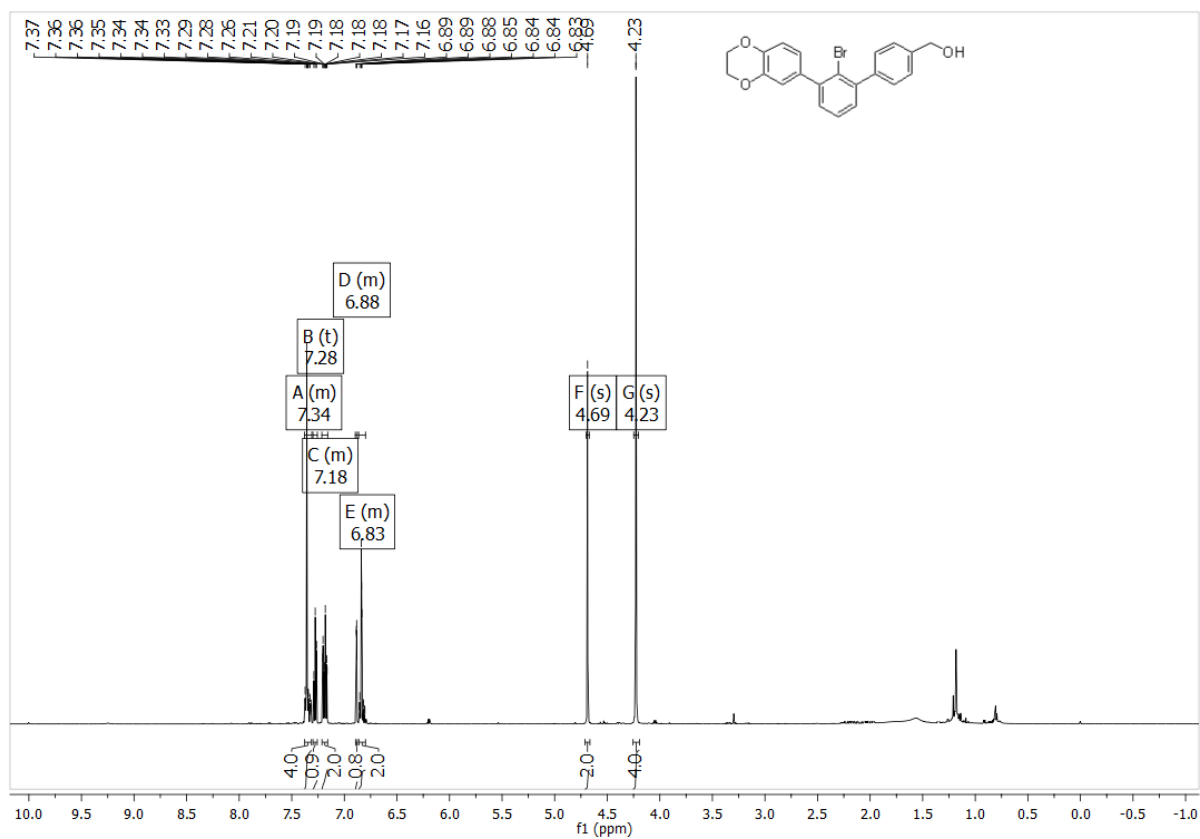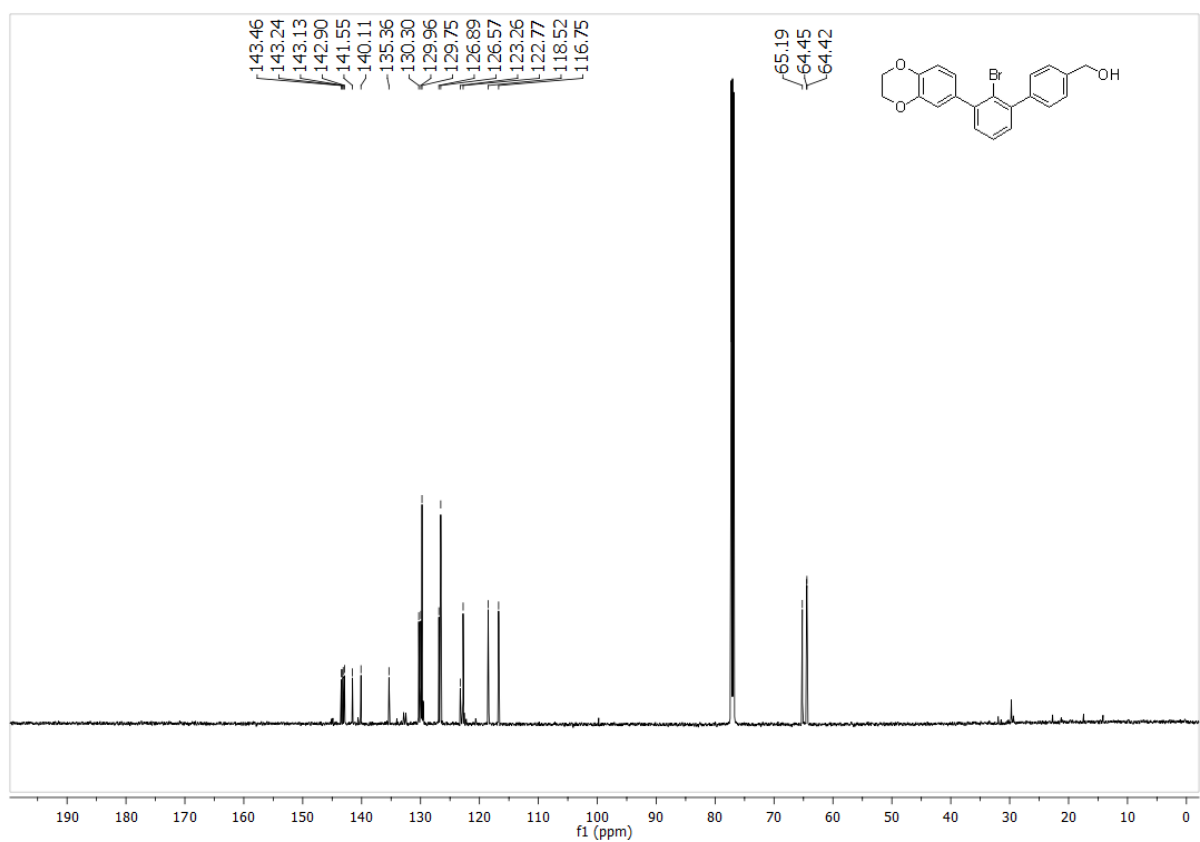

4g. (3'-(Benzo-1,4-dioxan-6-yl)-2'-iodo-[1,1'-biphenyl]-4-yl)methanol

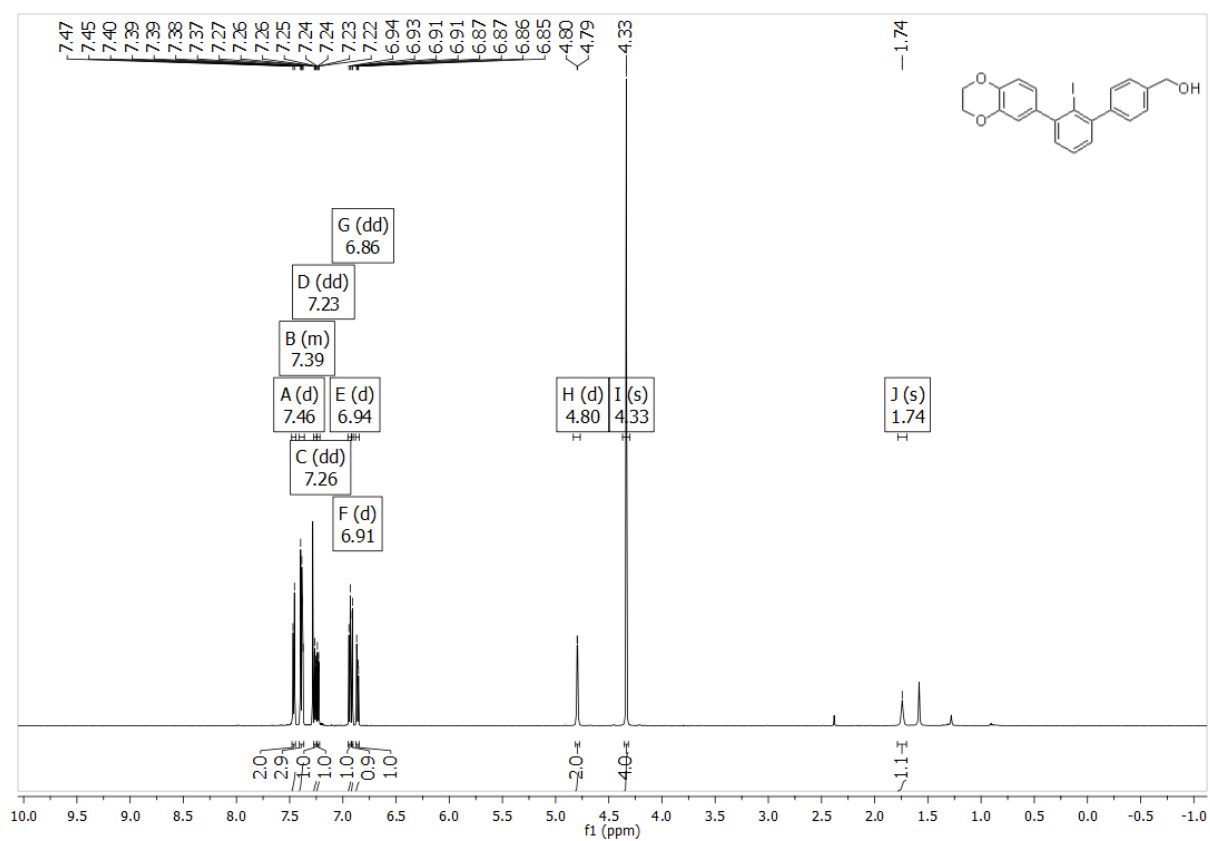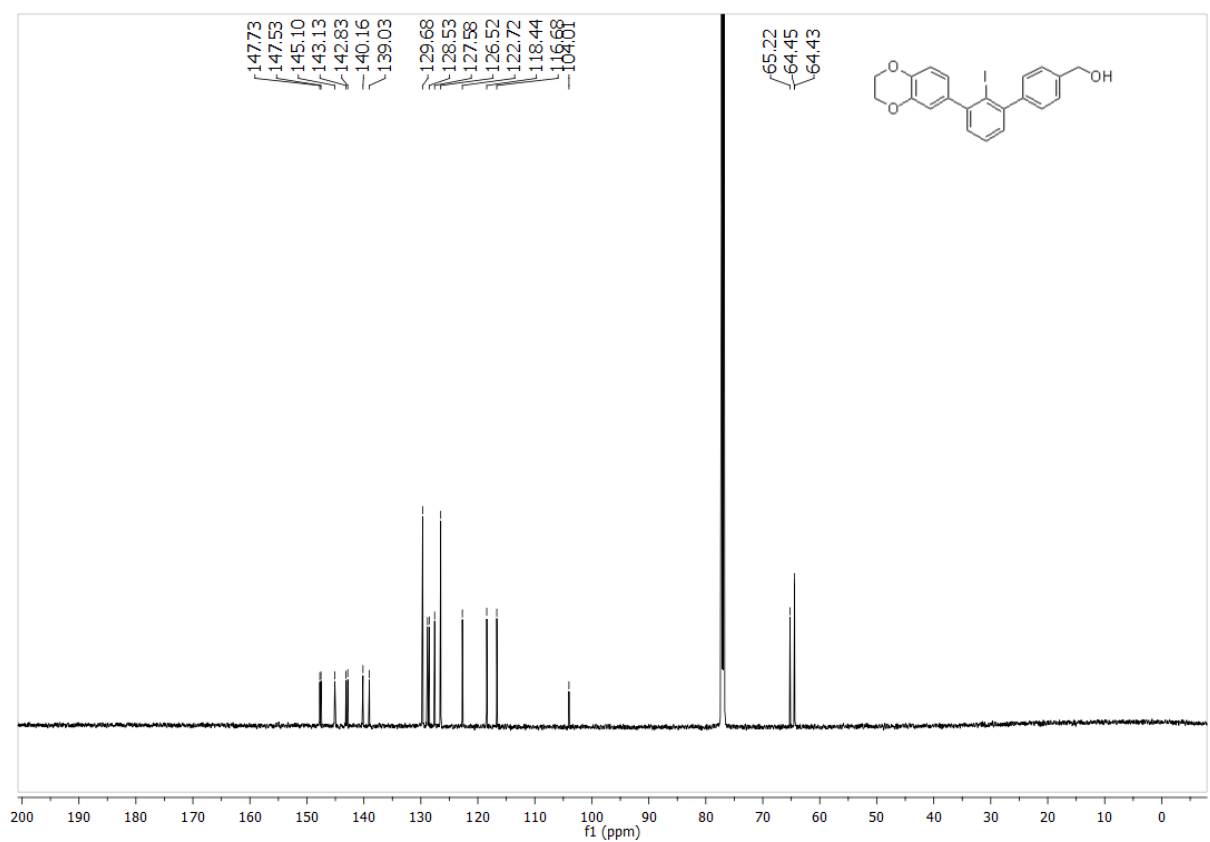

#### 4h. 3-(3'-(Benzo-1,4-dioxan-6-yl)-4'-(hydroxymethyl)-[1,1'-biphenyl]-2-carbonitrile

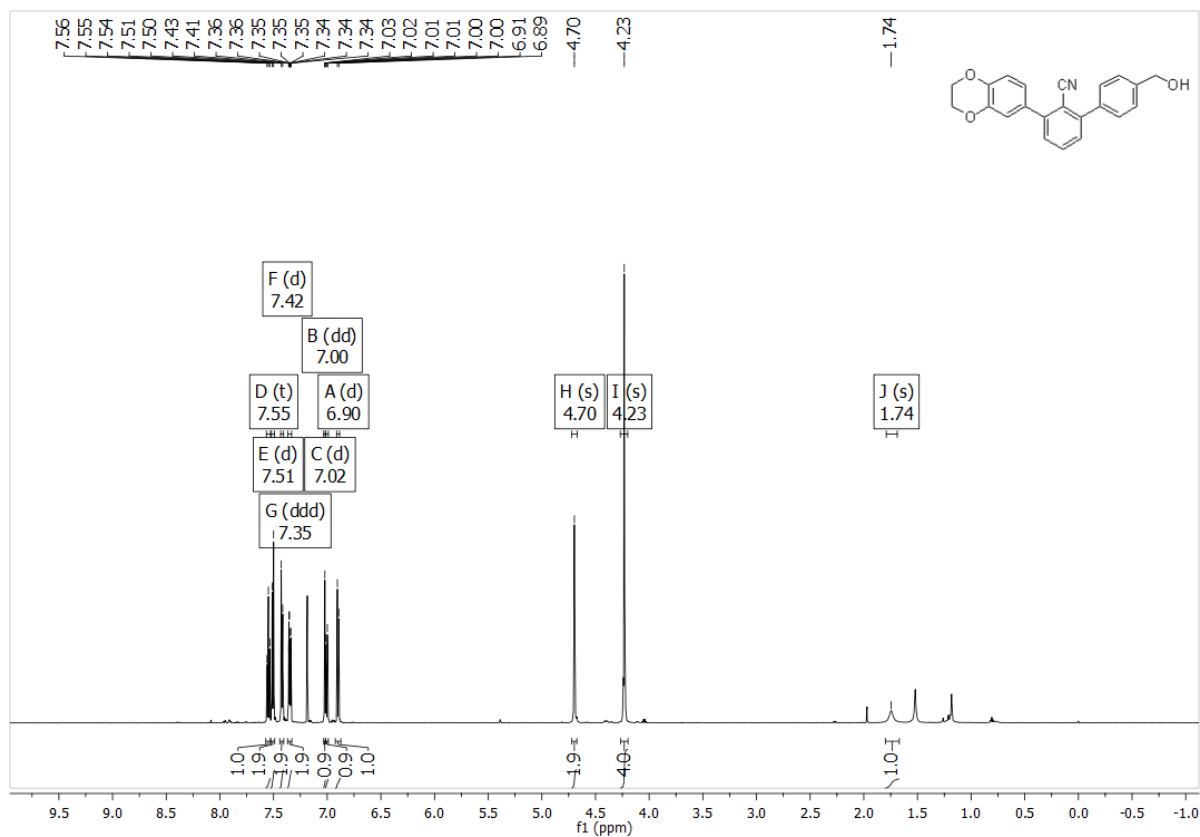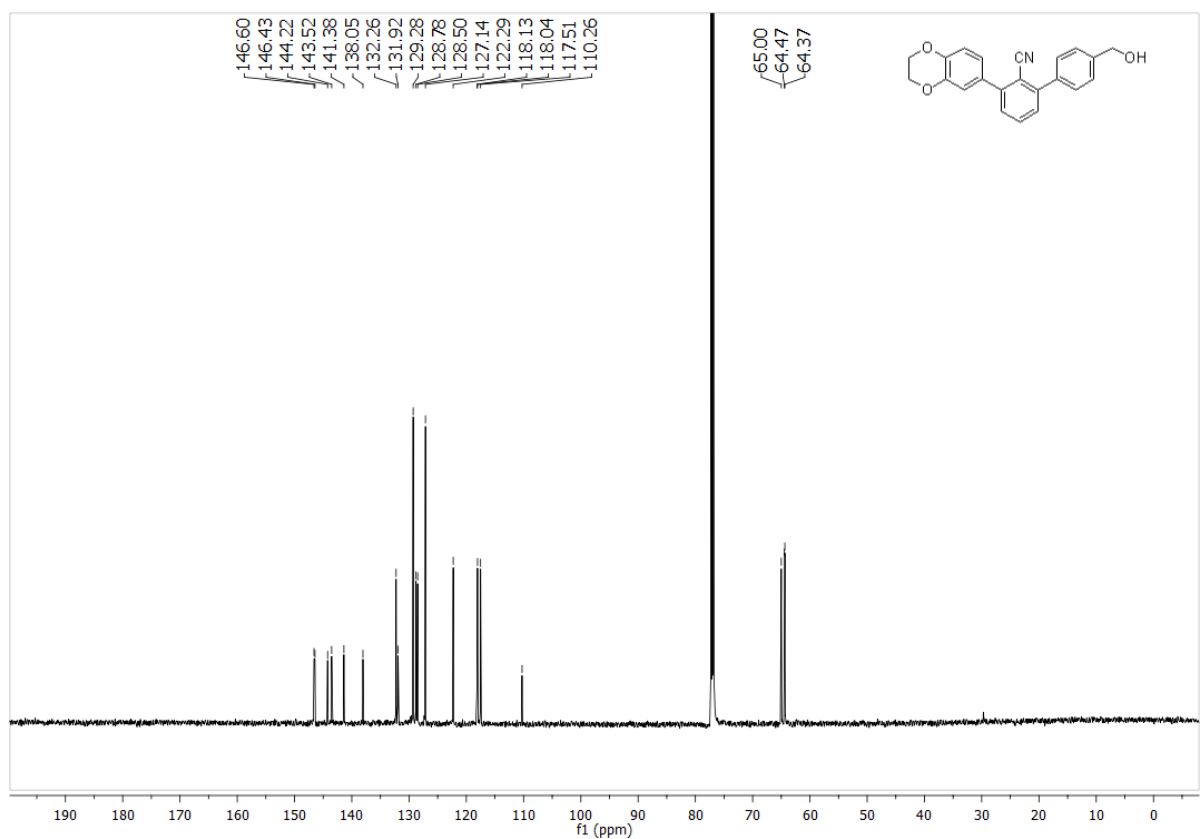

4i. (3'-(Benzo-1,4-dioxan-6-yl)-3-methoxy-2'-methyl-[1,1'-biphenyl]-4-yl)methanol

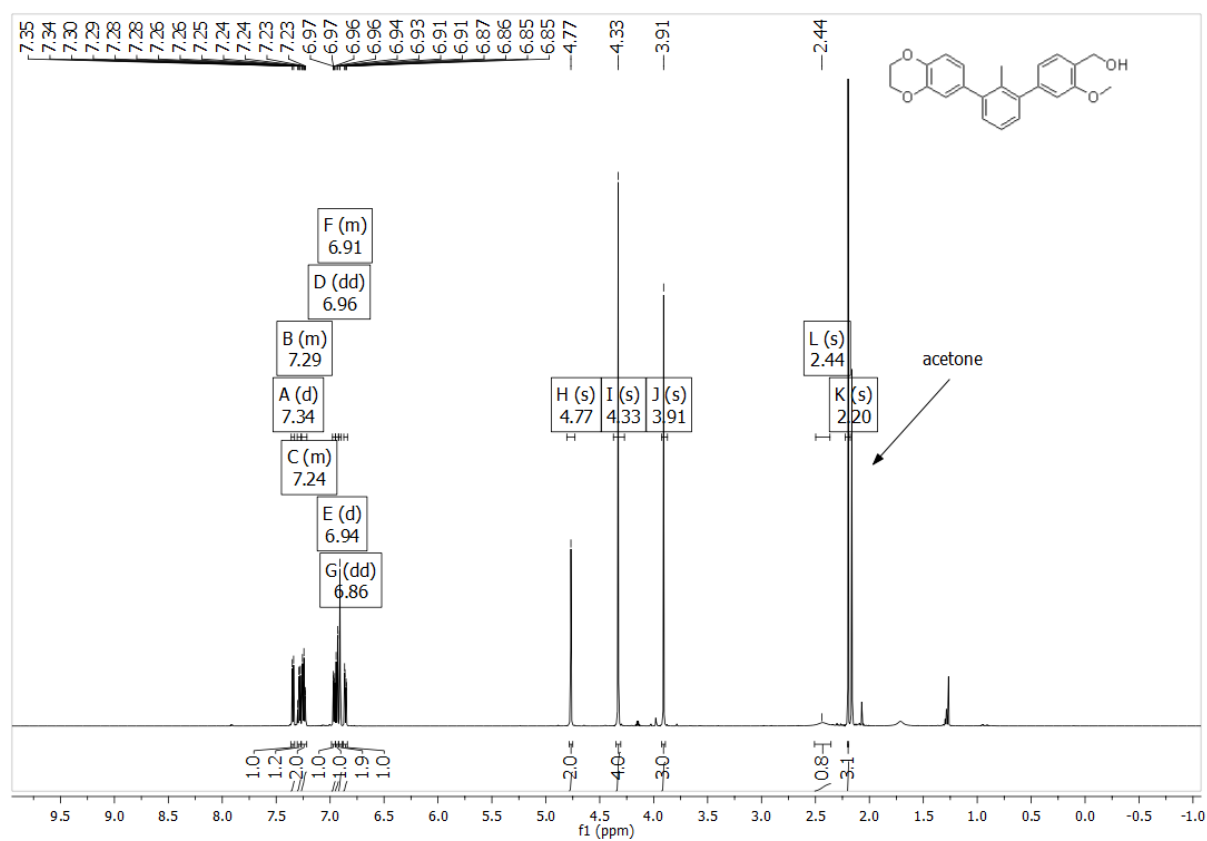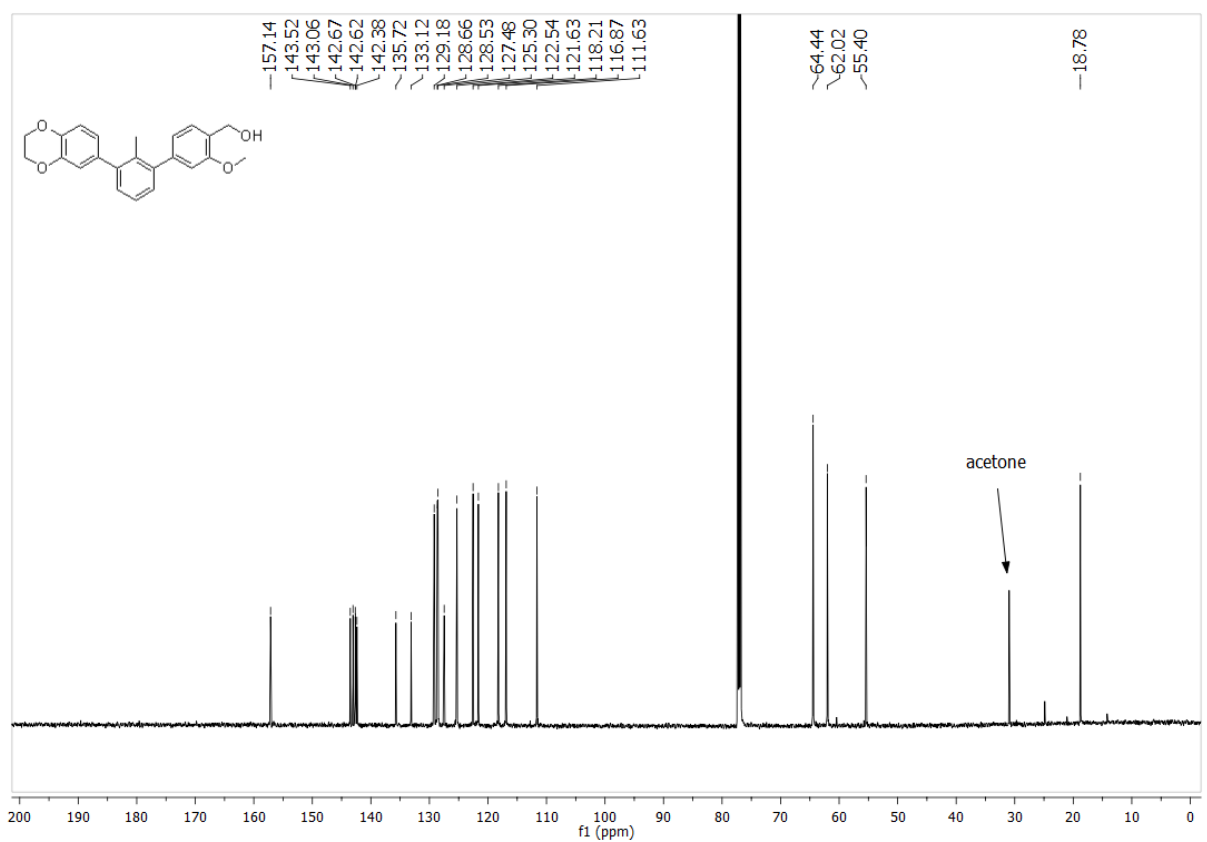

4j. 3-(((3'-(Benzo-1,4-dioxan-6-yl)-4-(hydroxymethyl)-2'-methyl-[1,1'-biphenyl]-3-yl)oxy)methyl)benzonitrile

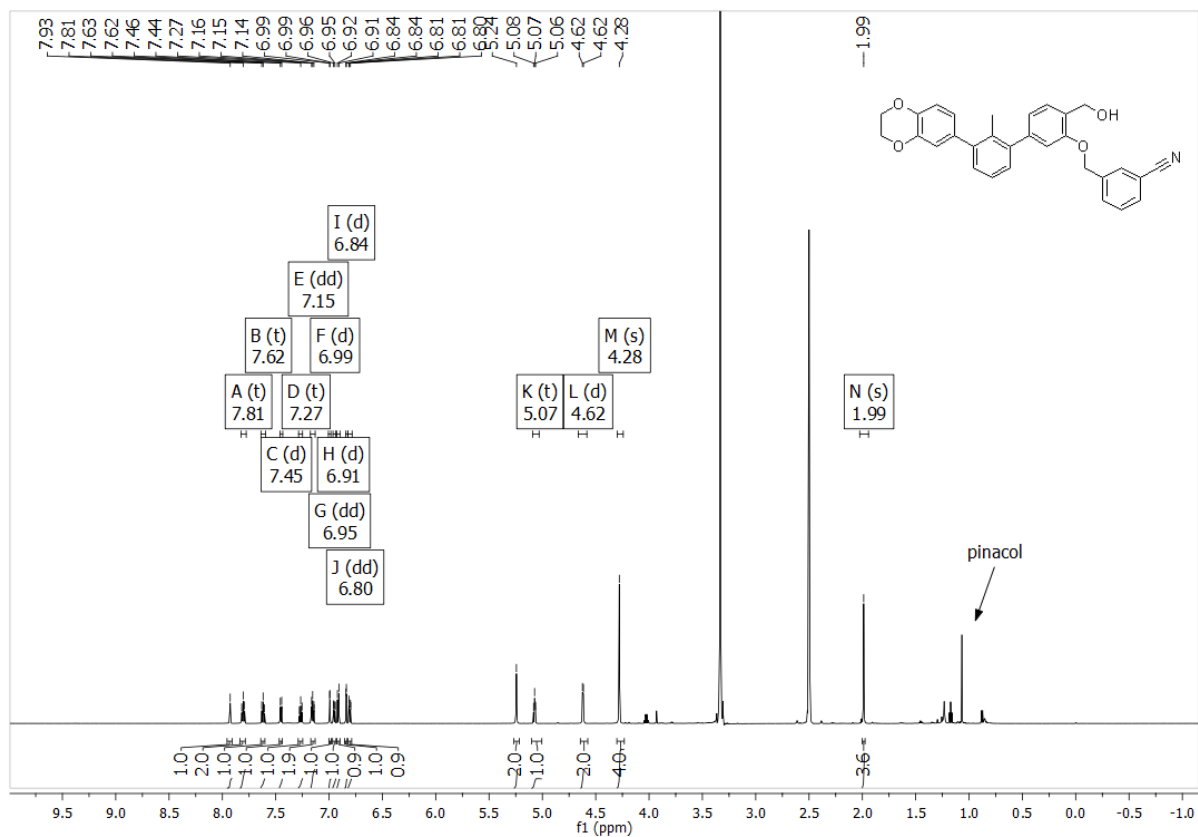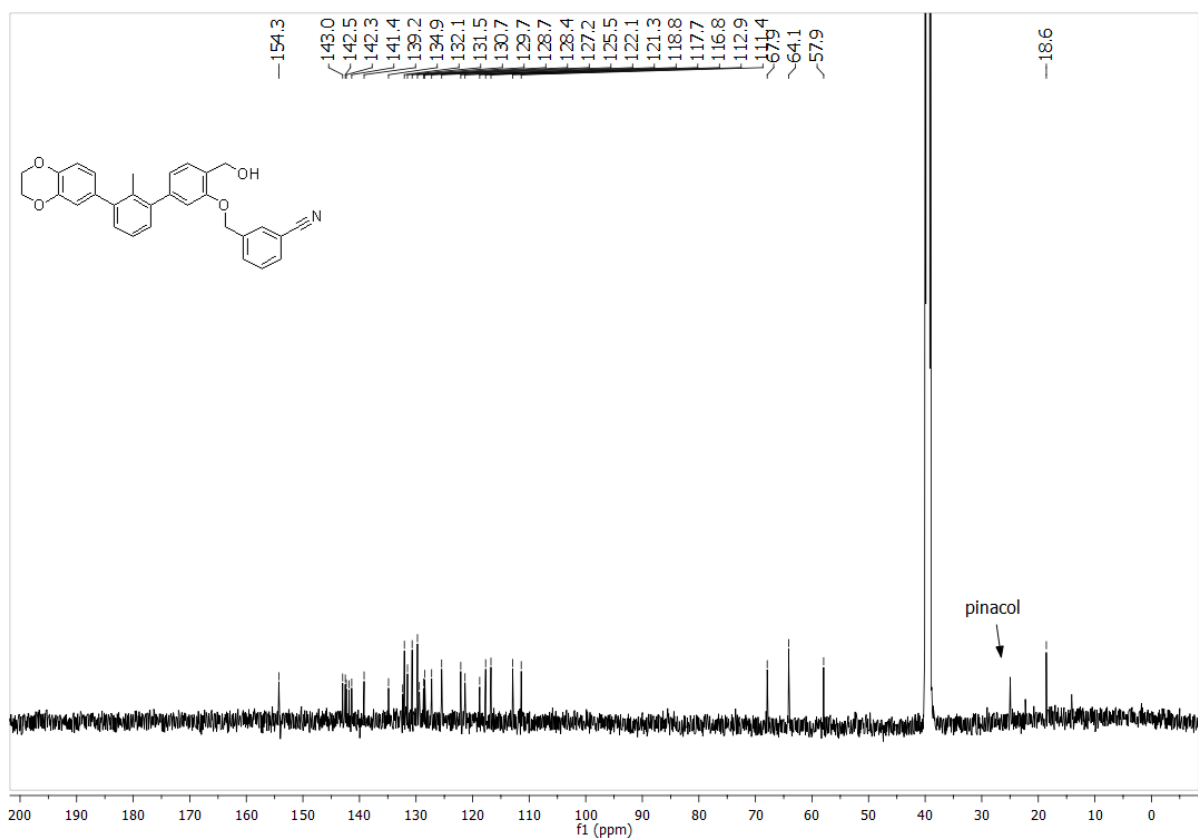

**4k. (2'-Chloro-3'-(benzo-1,4-dioxan-6-yl)-3-methoxy-[1,1'-biphenyl]-4-yl)methanol**

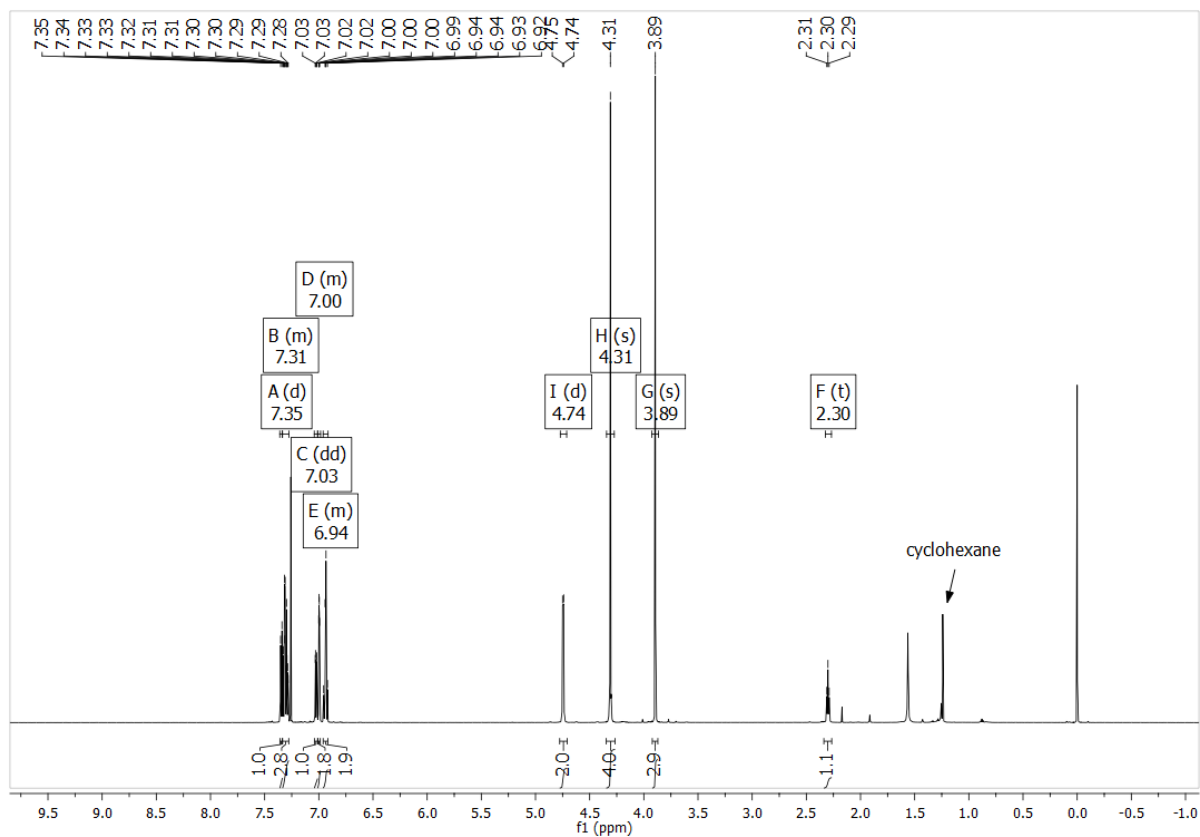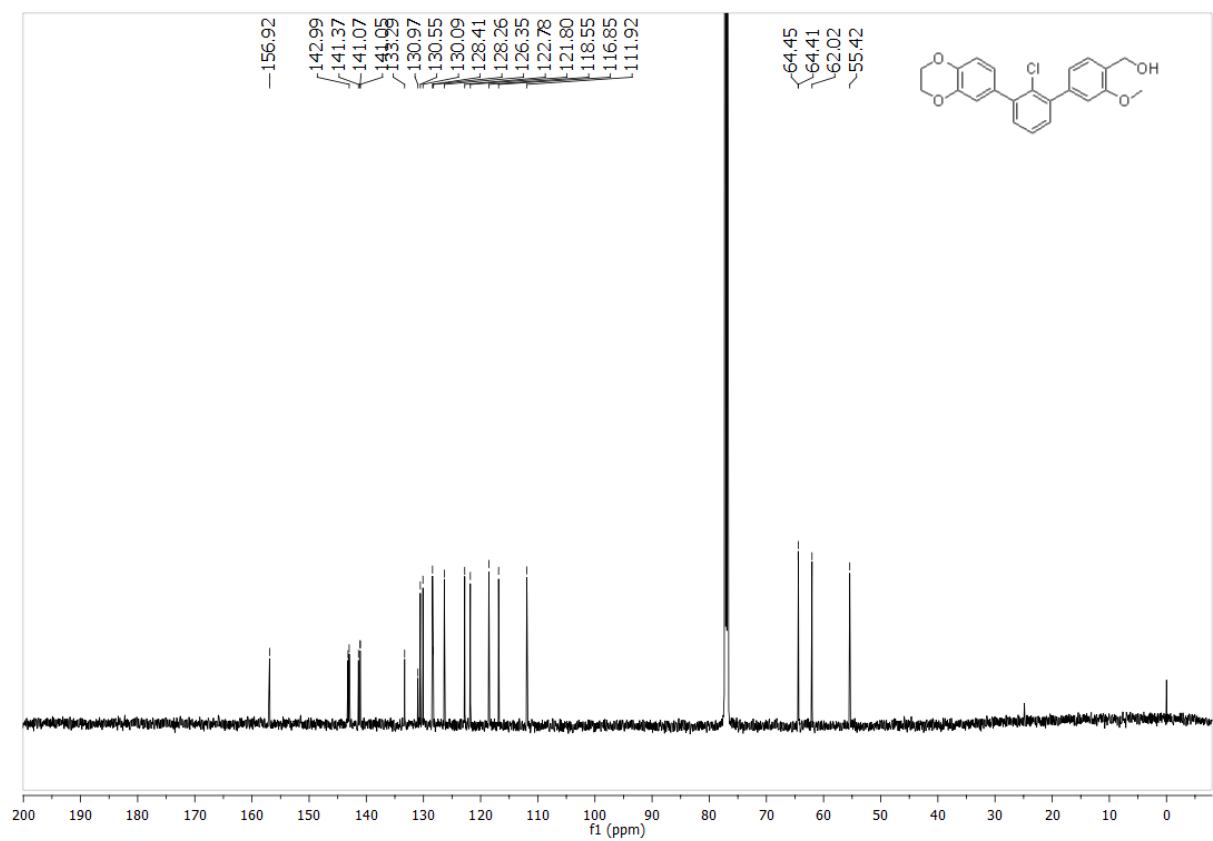

4I. (2'-Chloro-3'-(benzo-1,4-dioxan-6-yl)-3-ethoxy-[1,1'-biphenyl]-4-yl)methanol

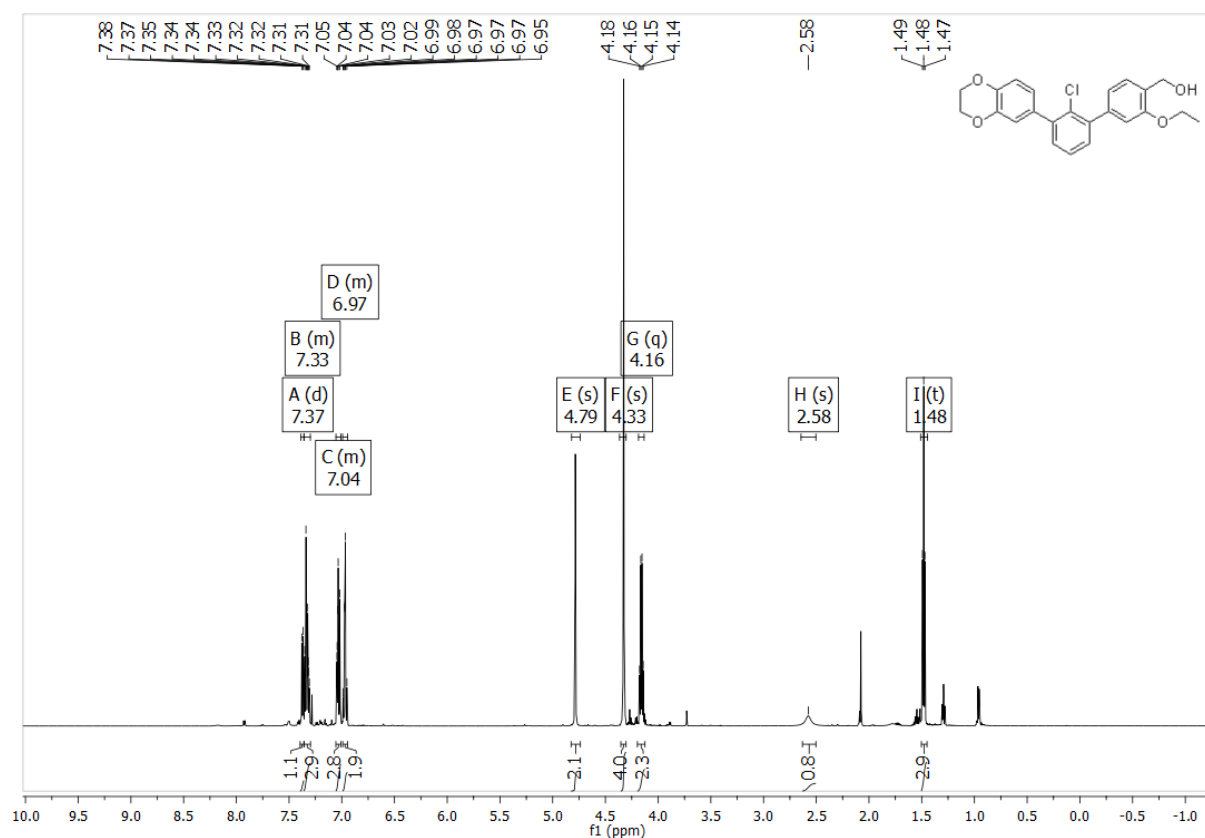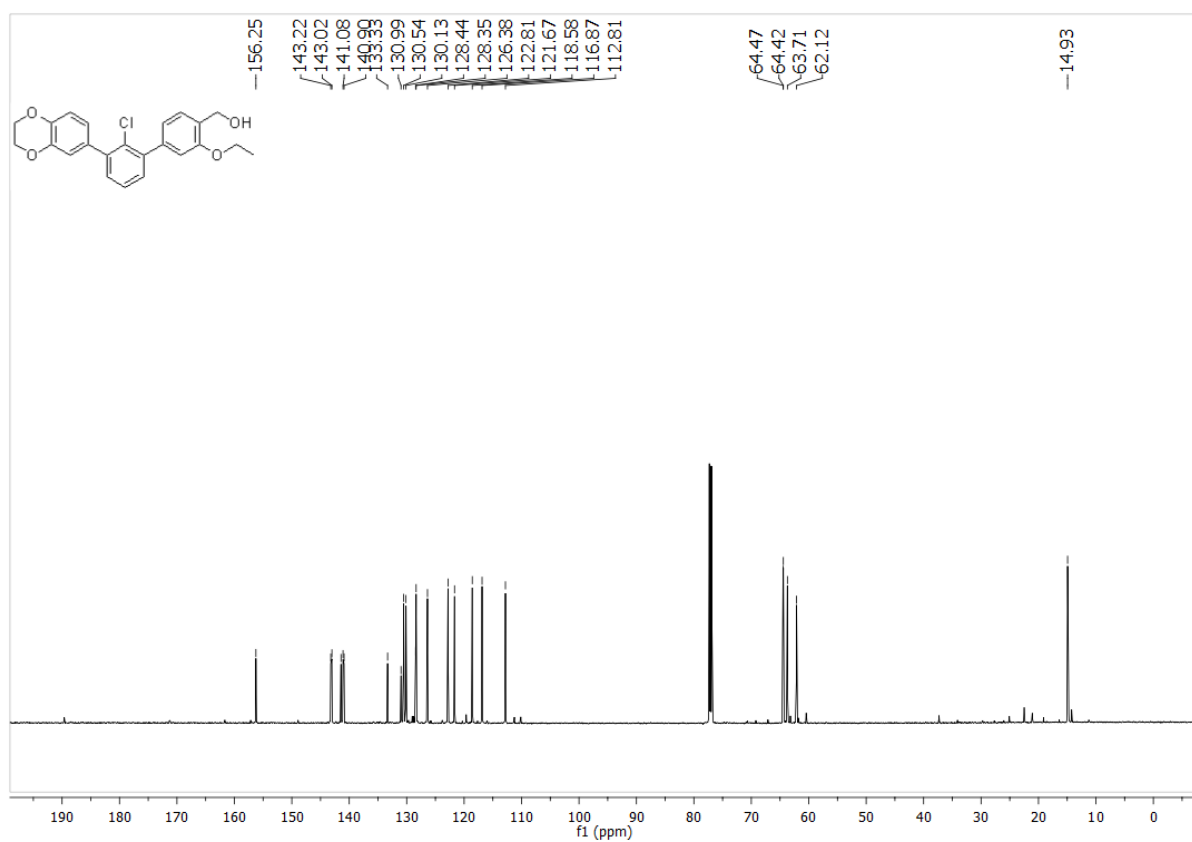



**4m. (3'-(Benzo-1,4-dioxan-6-yl)-2'-chloro-3-isopropoxy-[1,1'-biphenyl]-4-yl)methanol**

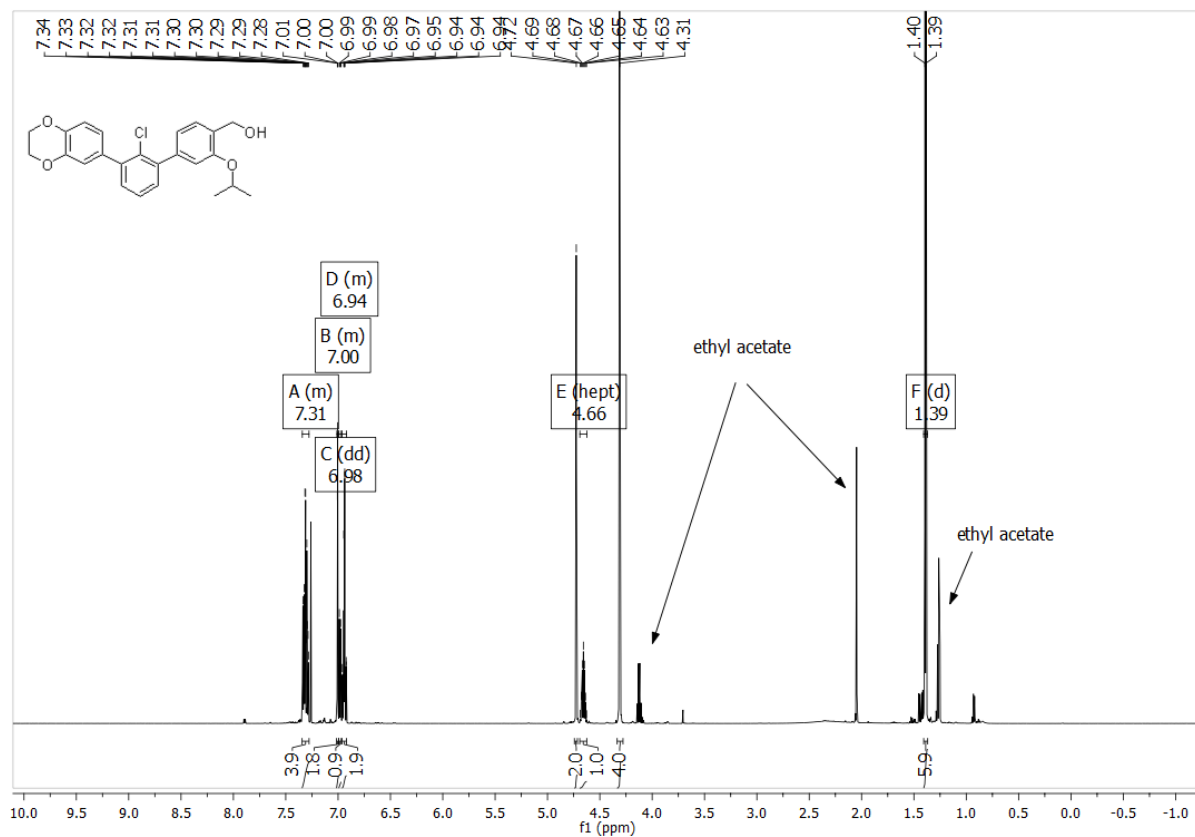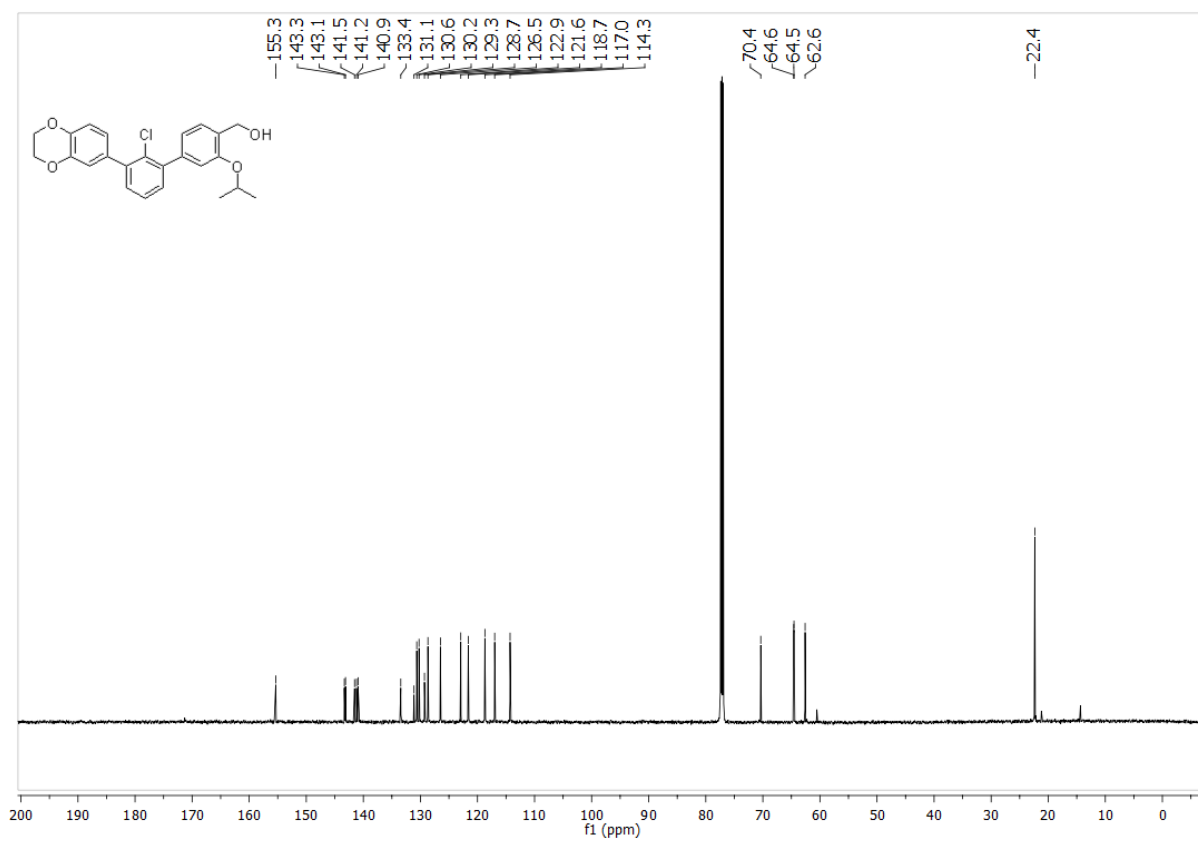

4n. (3'-(benzo-1,4-dioxan-6-yl)-2'-chloro-3-isopentyloxy-[1,1'-biphenyl]-4-yl)methanol

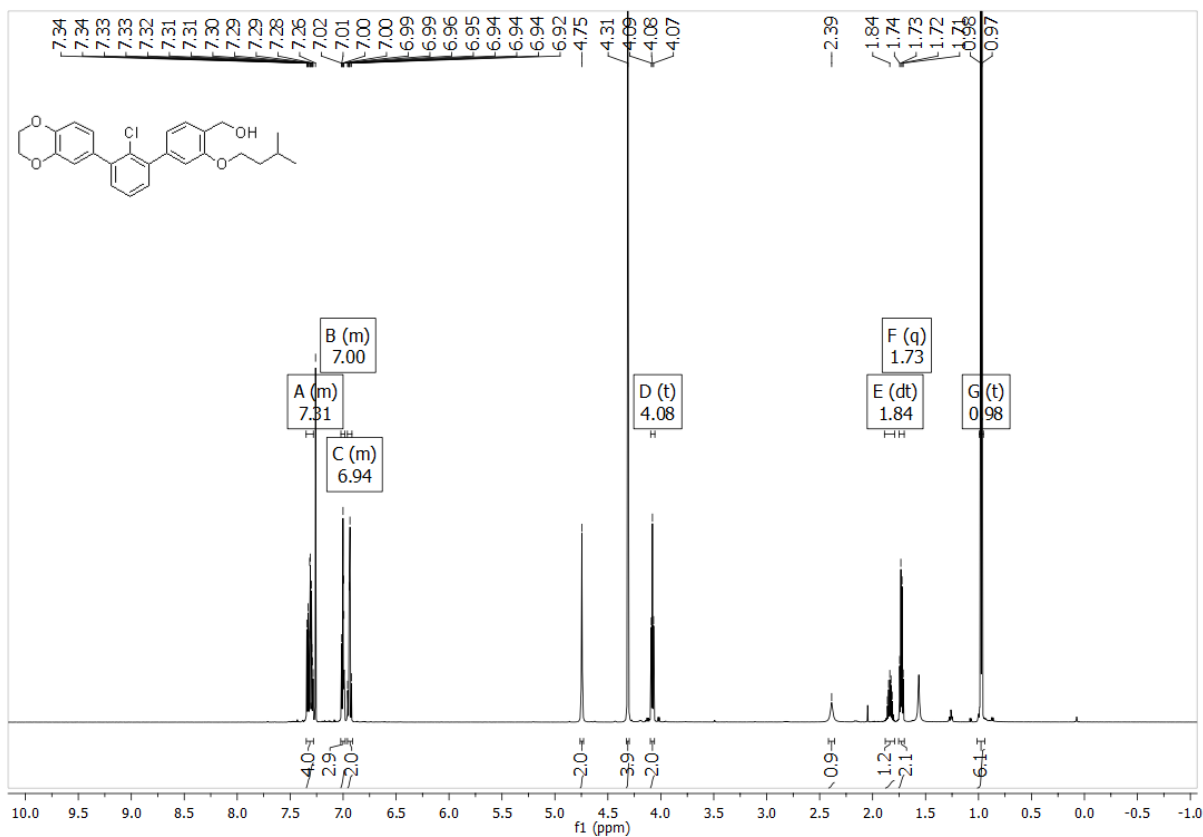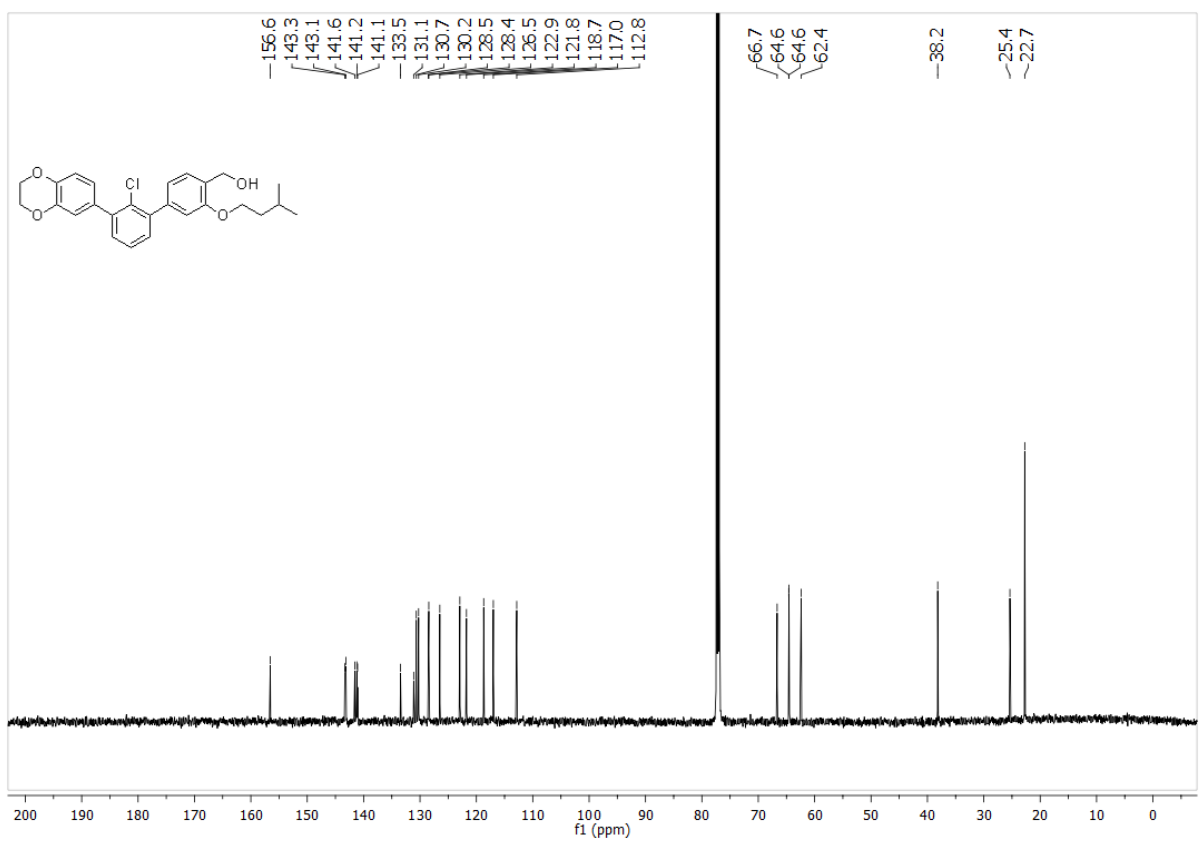

**4o. 2-((3'-(Benzo-1,4-dioxan-6-yl)-2'-chloro-4-(hydroxymethyl)-[1,1'-biphenyl]-3-yl)oxy)acetonitrile**

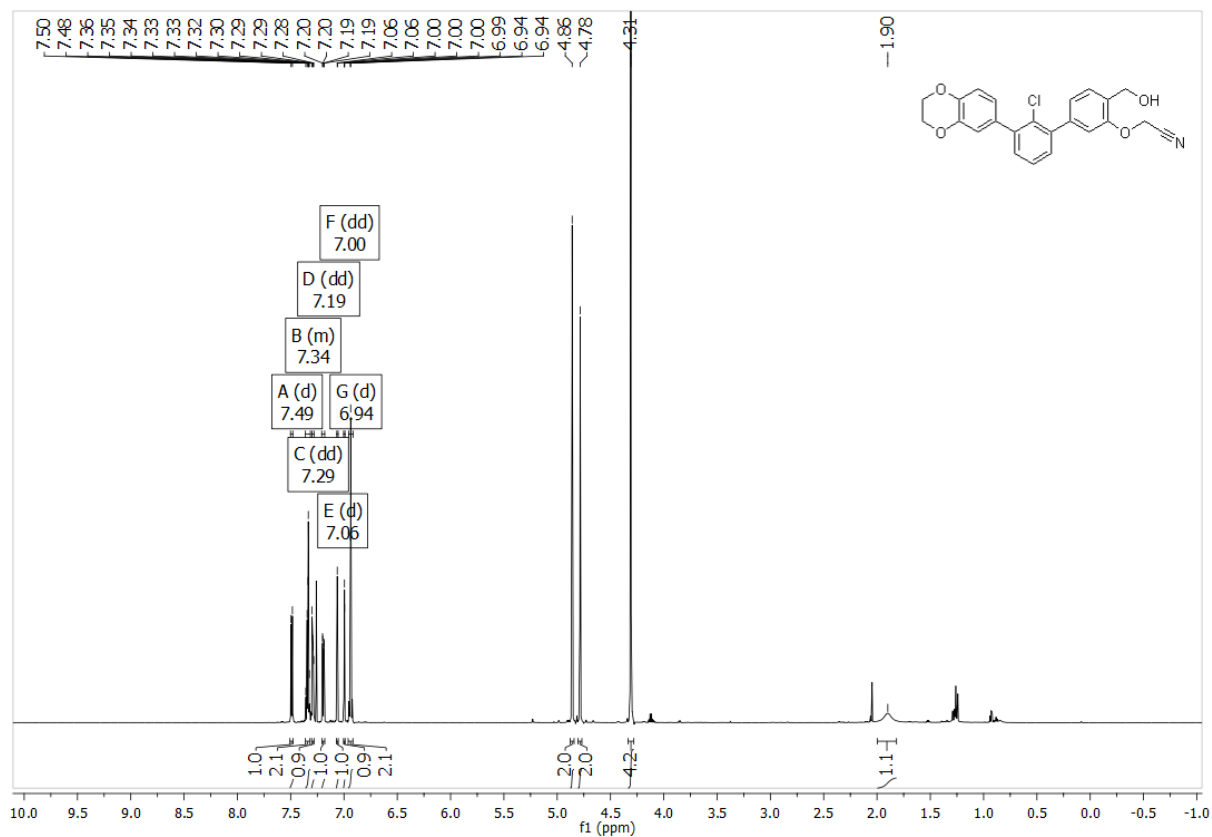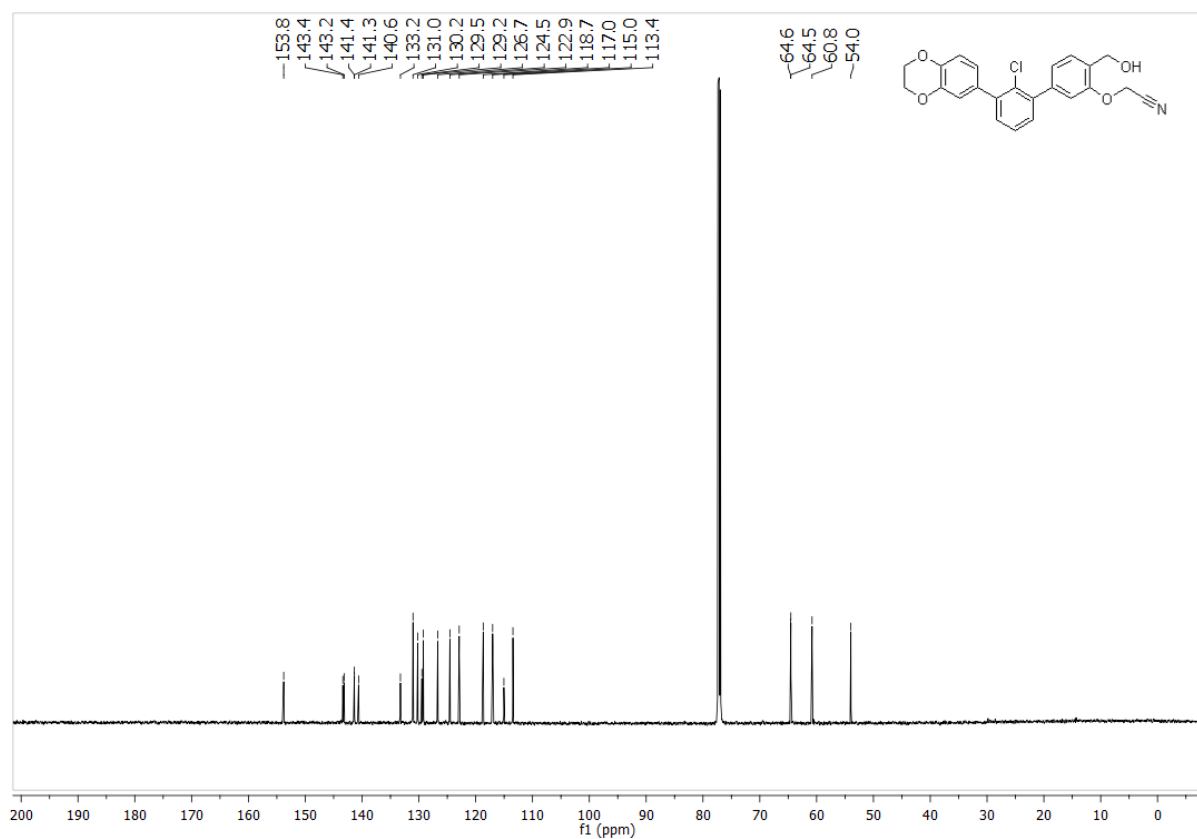

**4p.(3'-(benzo-1,4-dioxan-6-yl)-2'-chloro-3-cyclobutylmethoxy-[1,1'-biphenyl]-4-yl)methanol**

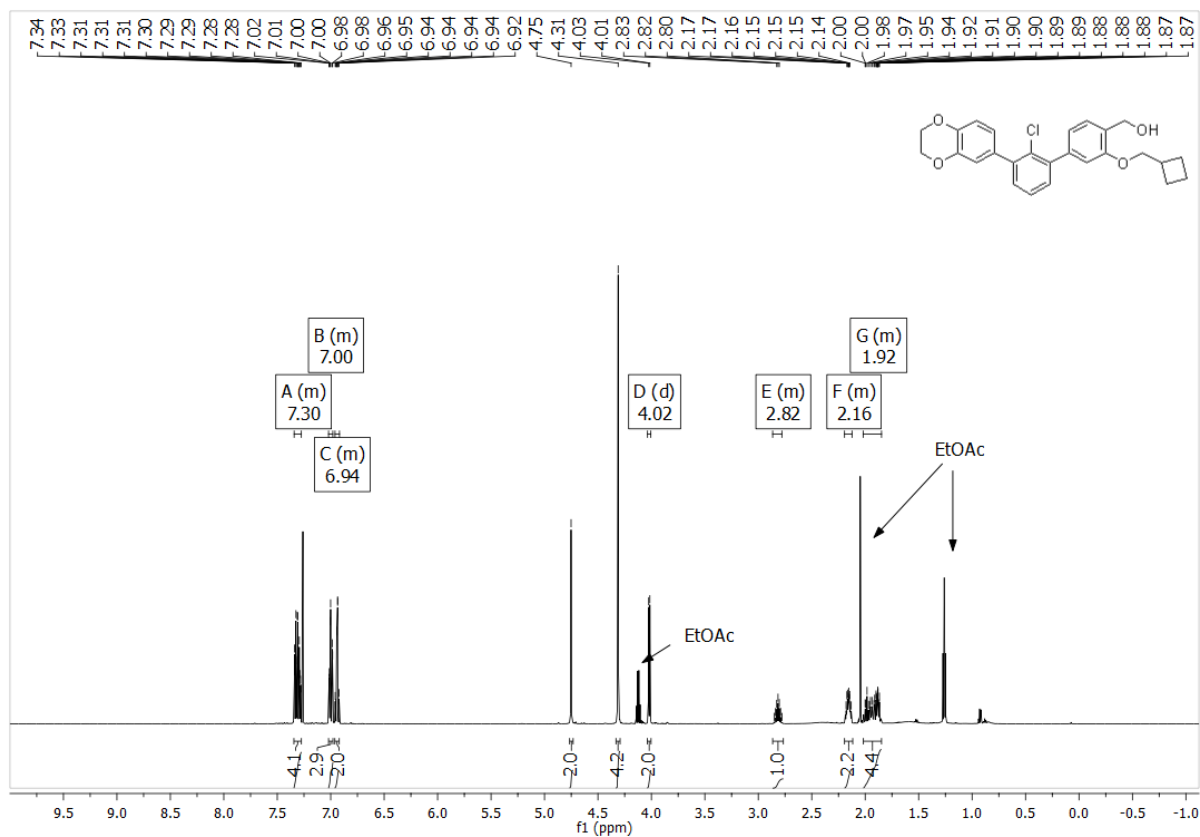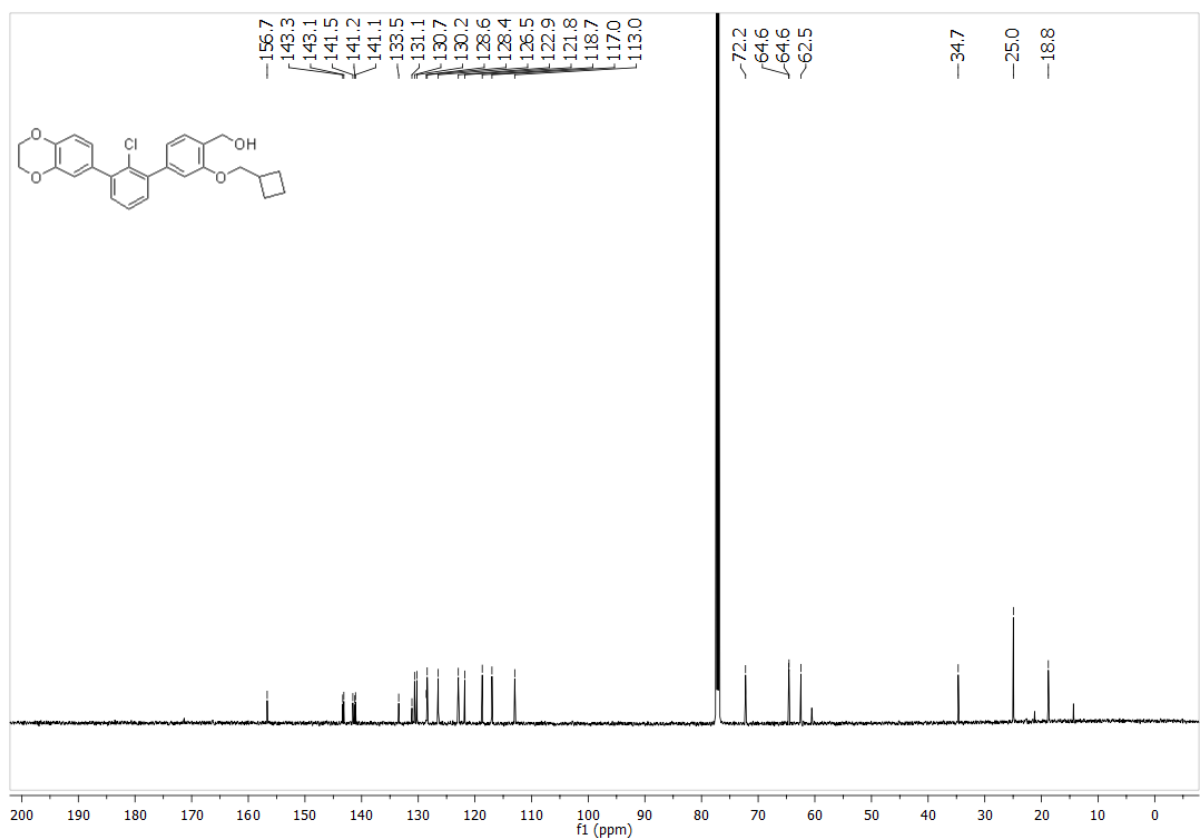

**4q. (3'-(Benzo-1,4-dioxan-6-yl)-2'-chloro-3-cyclopentylmethoxy-[1,1'-biphenyl]-4-yl)methanol**

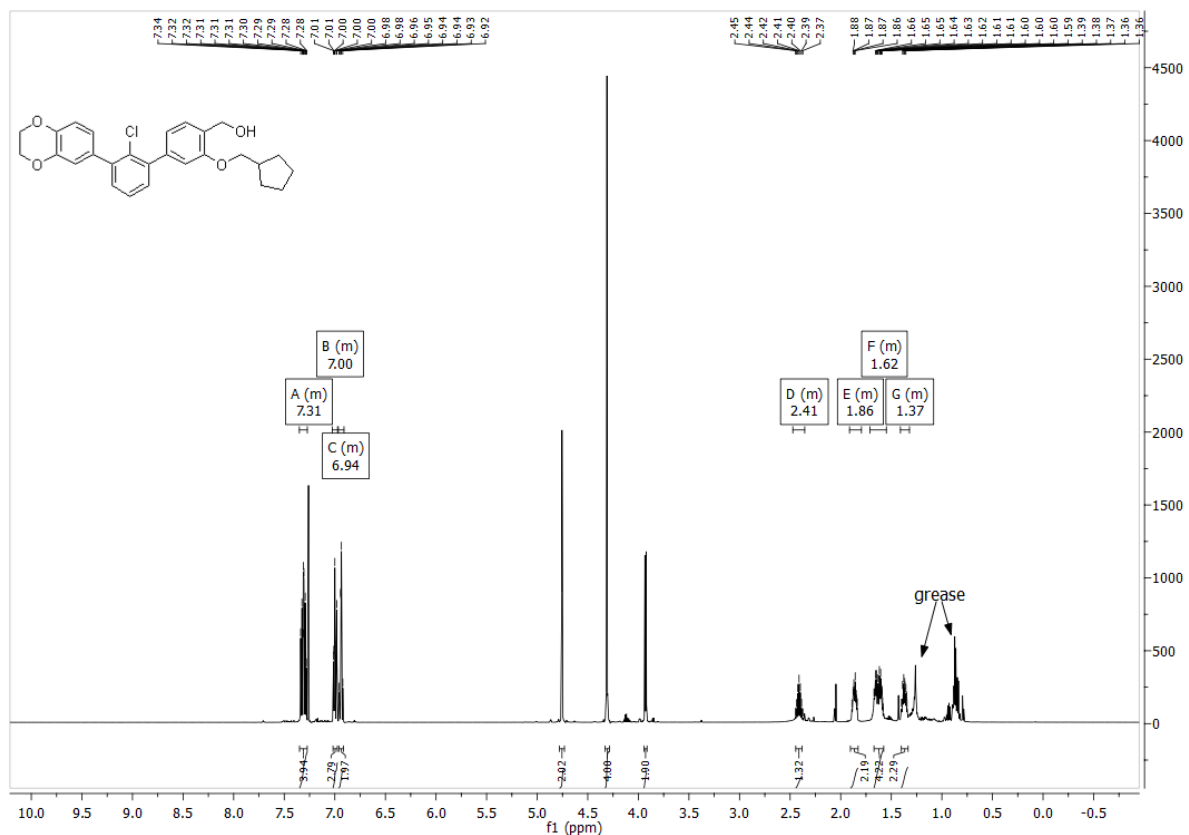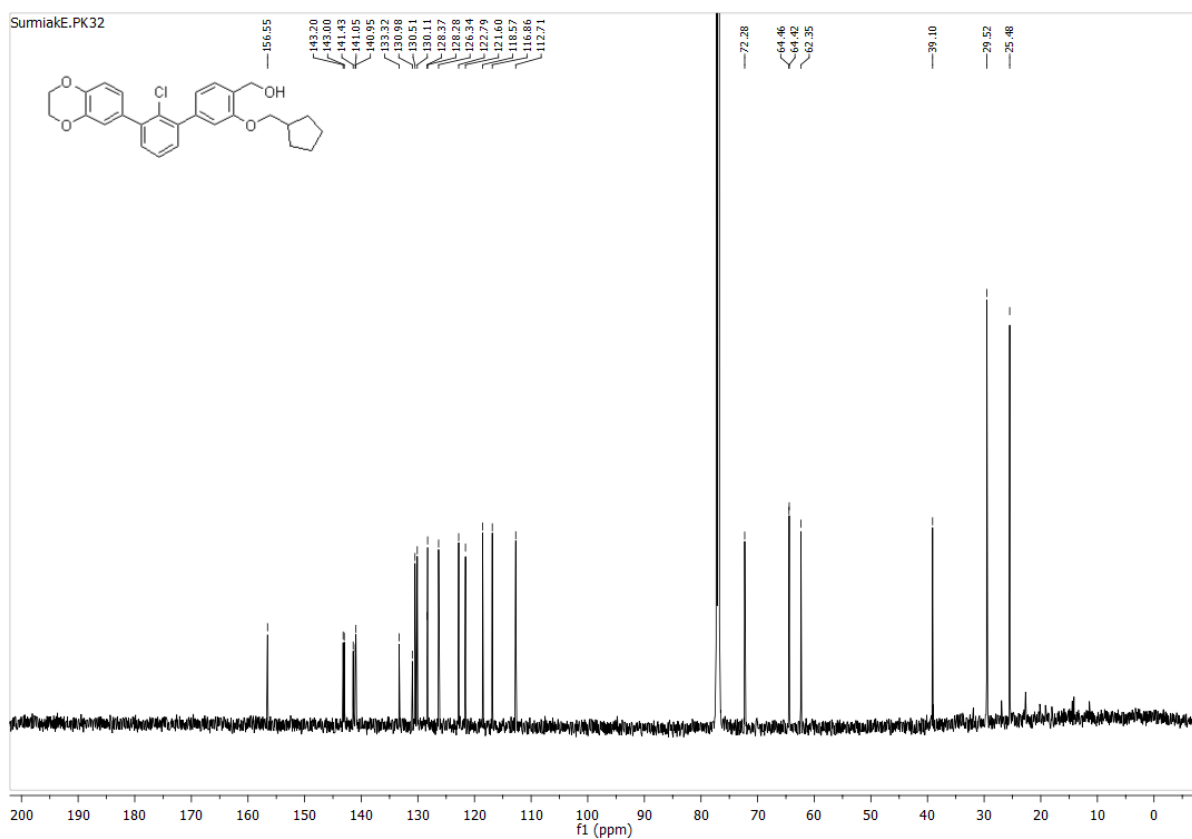

**4r. 3'-(((2'-Chloro-3'-(benzo-1,4-dioxan-6-yl)-4-(hydroxymethyl)-[1,1'-biphenyl]-3-yl)oxy)methyl)-[1,1'-biphenyl]-3-carbonitrile**

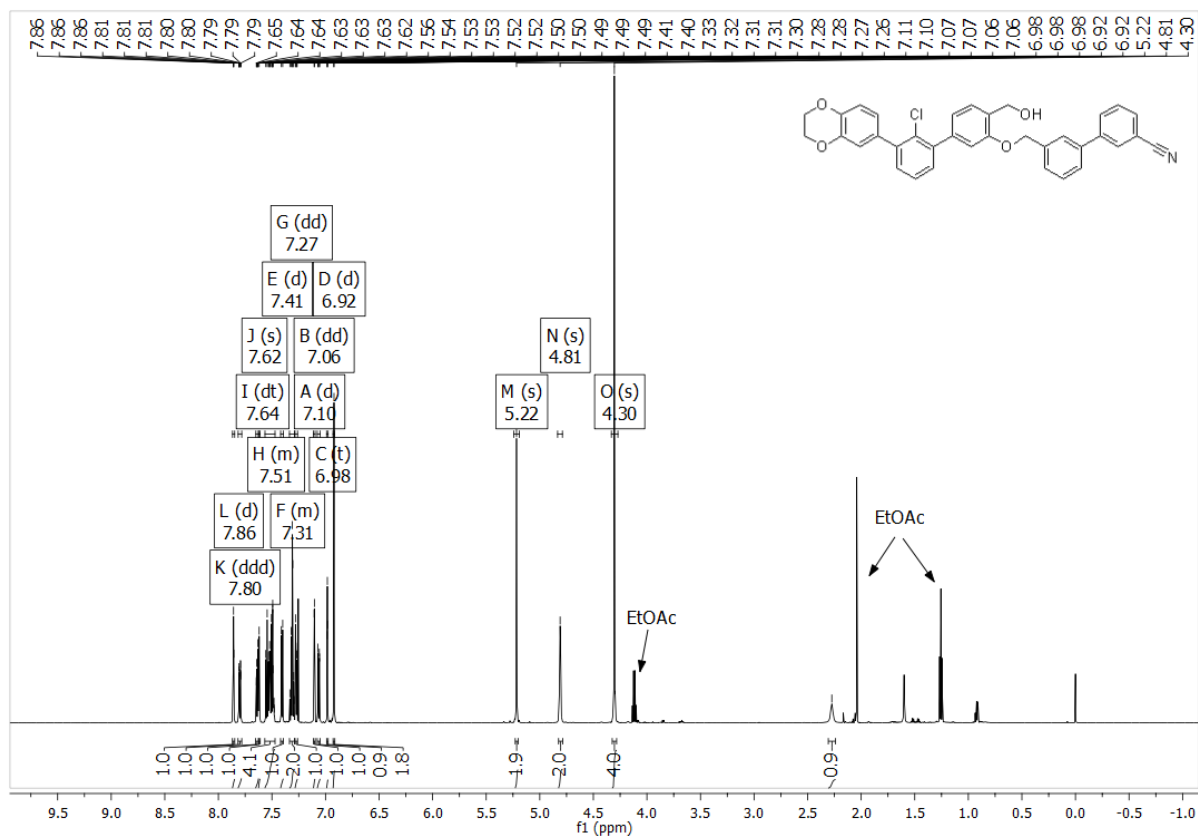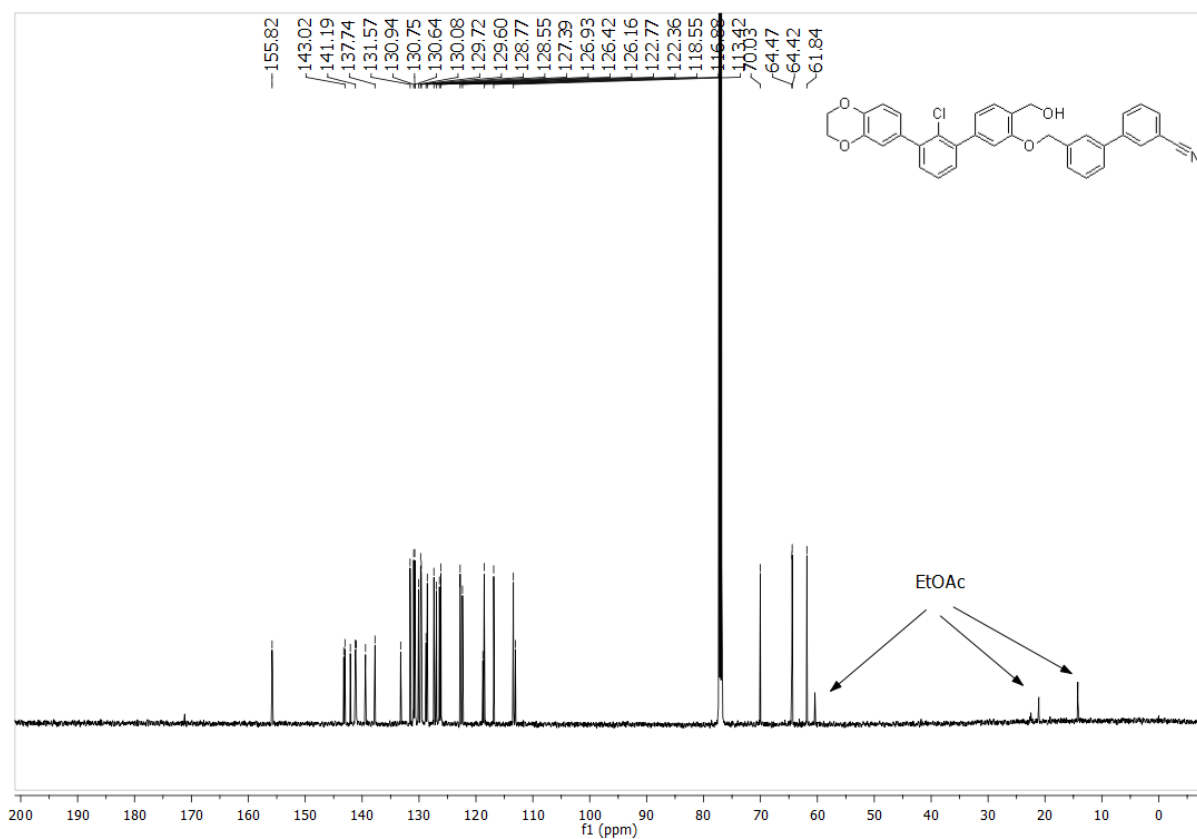

**5a. methyl 3-((3'-(benzo-1,4-dioxan-6-yl)-2'-methyl-[1,1'-biphenyl]-4-yl)methoxy)benzoate**

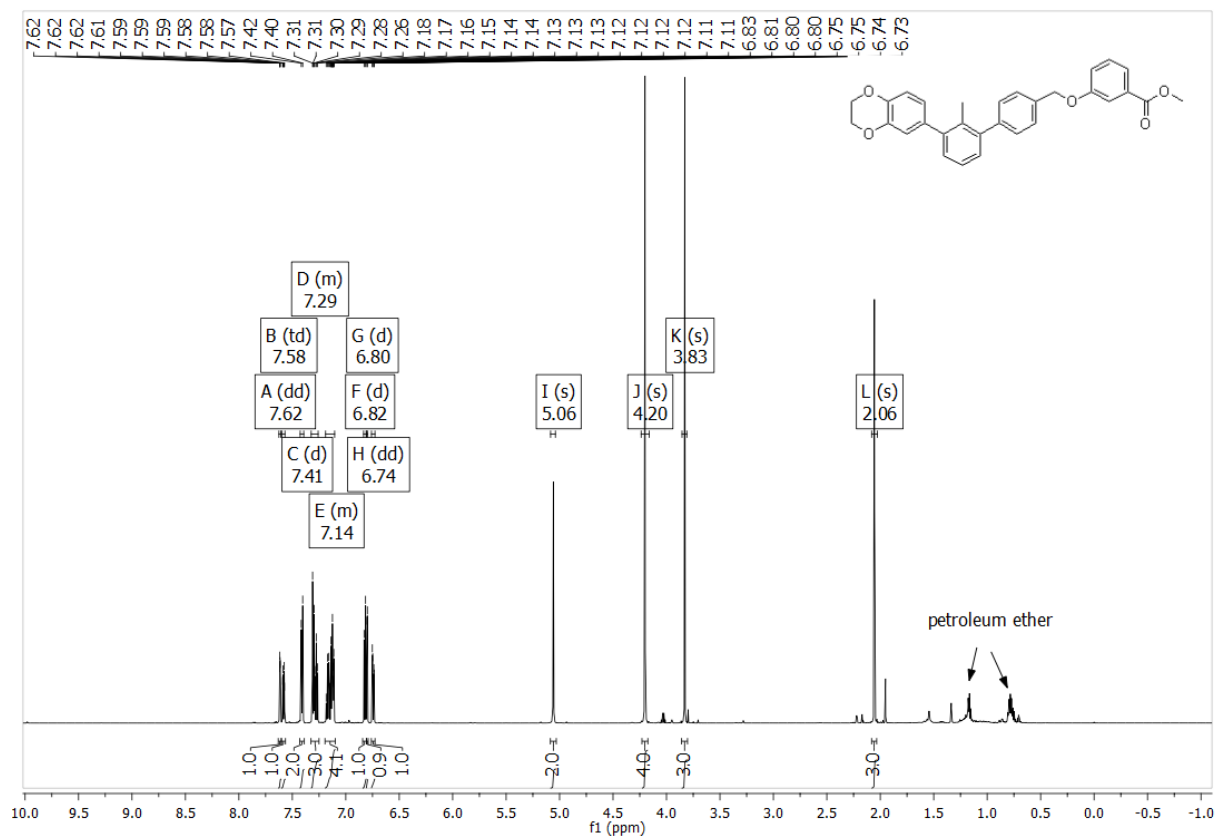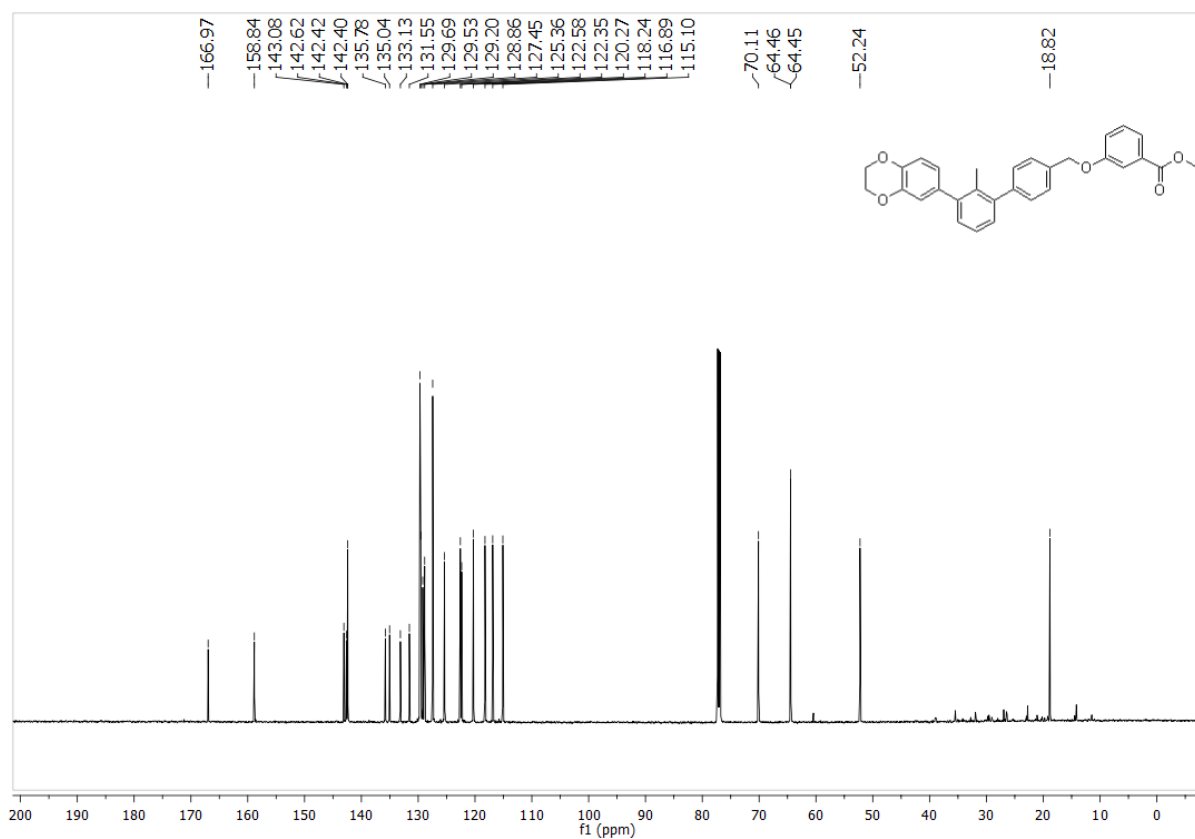

**5b. 3-((3'-(benzo-1,4-dioxan-6-yl)-2'-methyl-[1,1'-biphenyl]-4-yl)methoxy)benzoic acid**

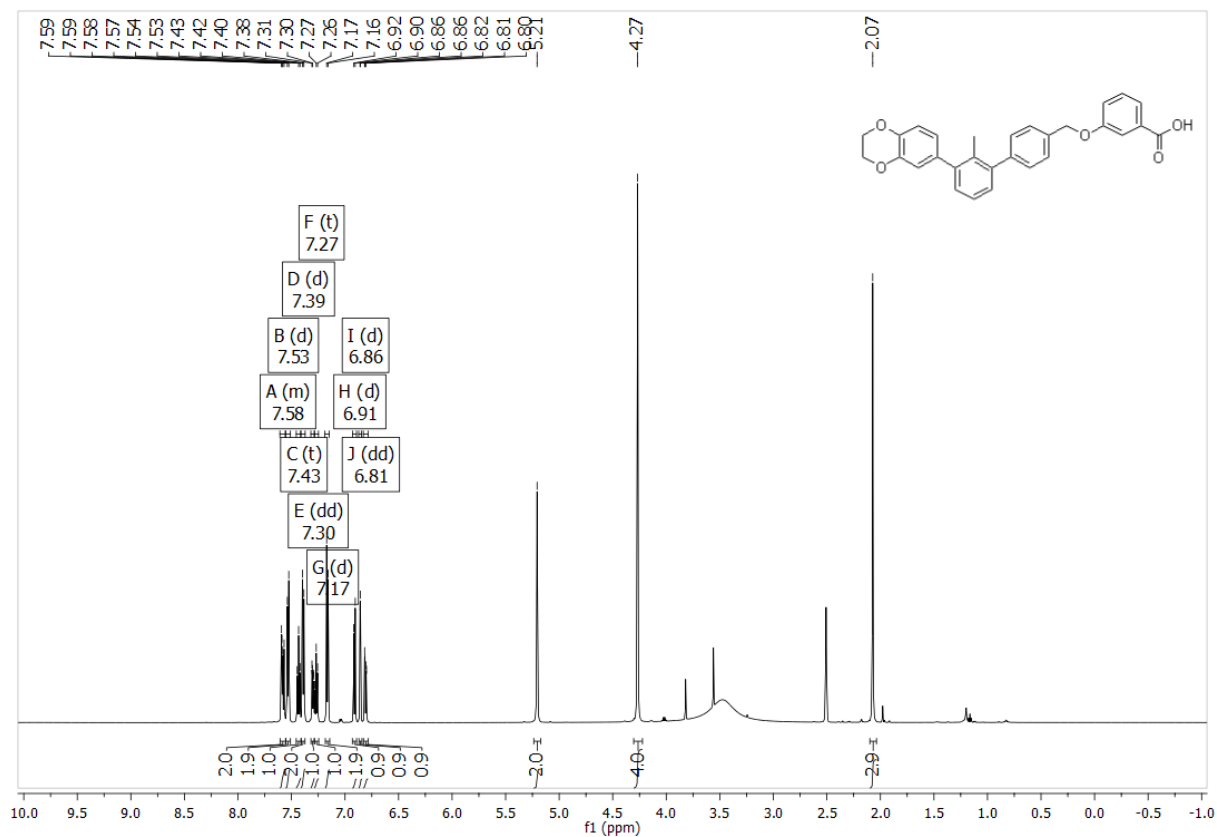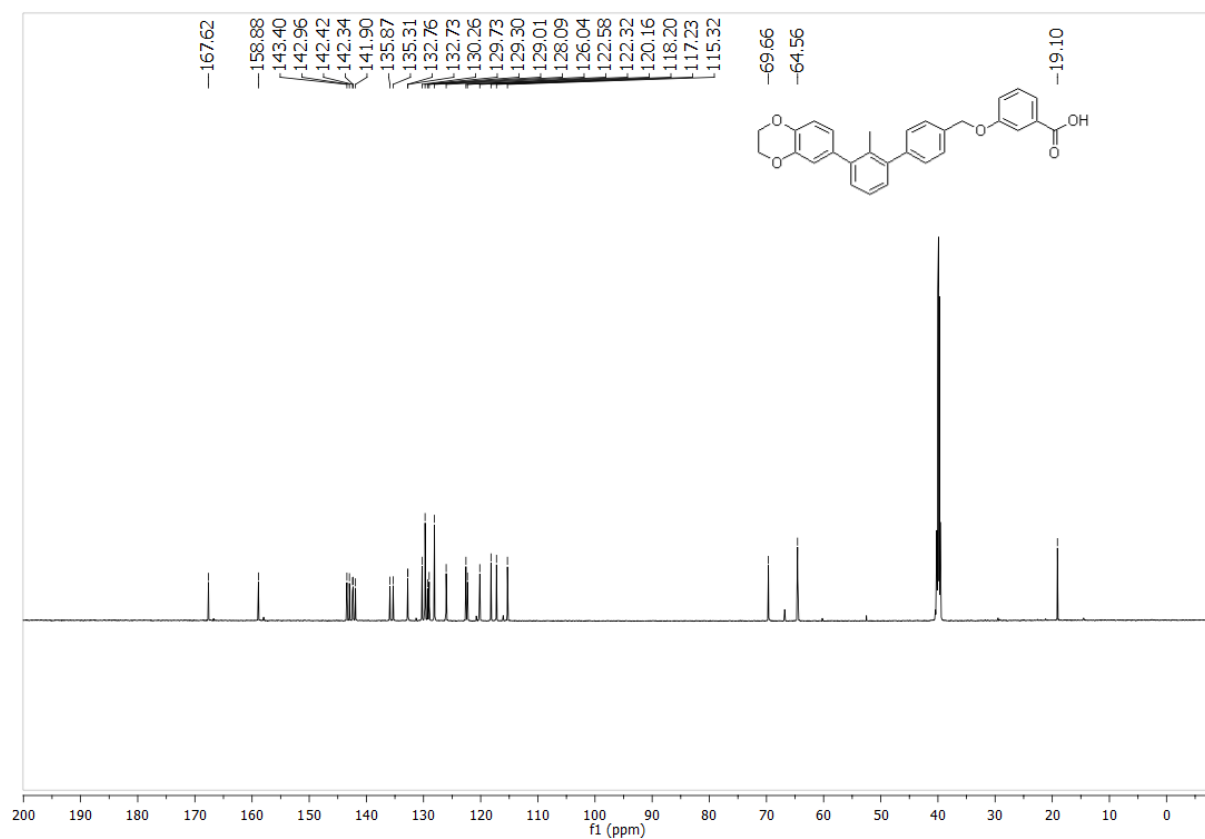



**5c. 2-Bromo-5-((3'-(benzo-1,4-dioxan-6-yl)-2'-methyl-[1,1'-biphenyl]-4-yl)methoxy)benzaldehyde**

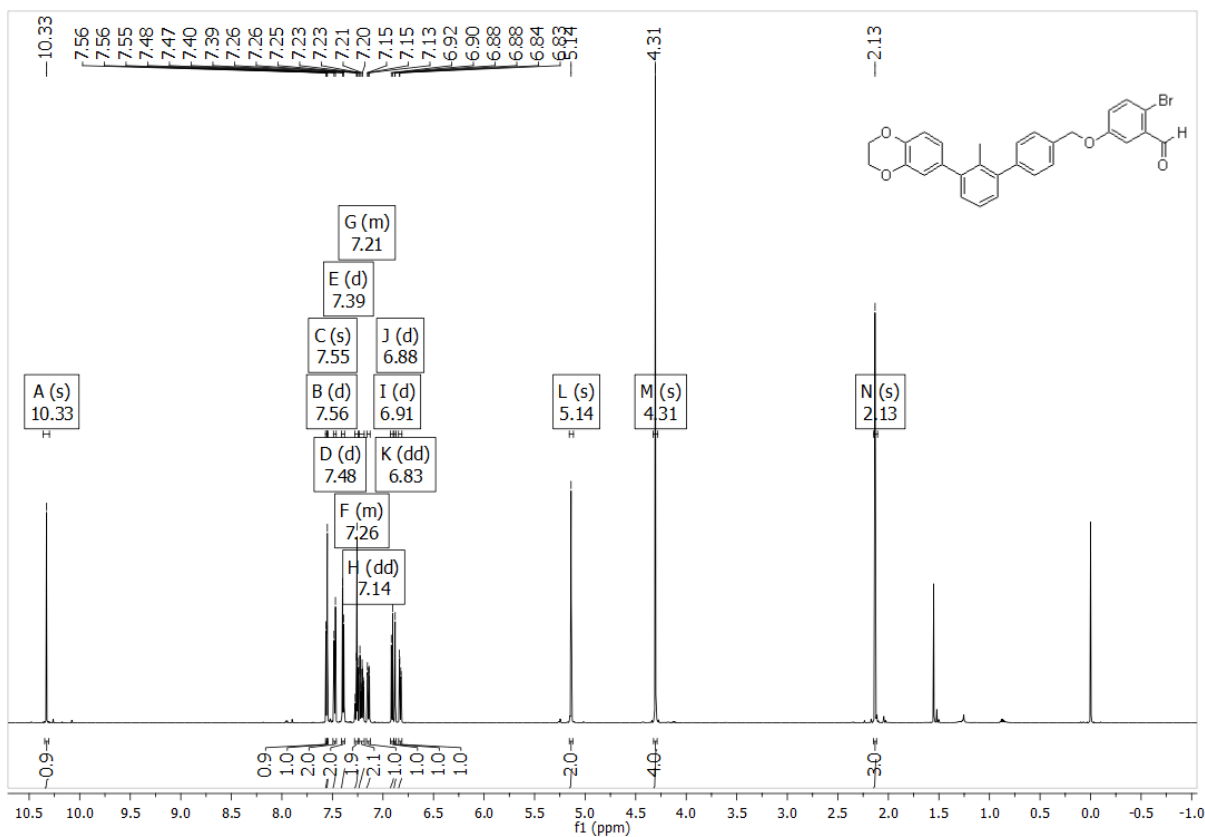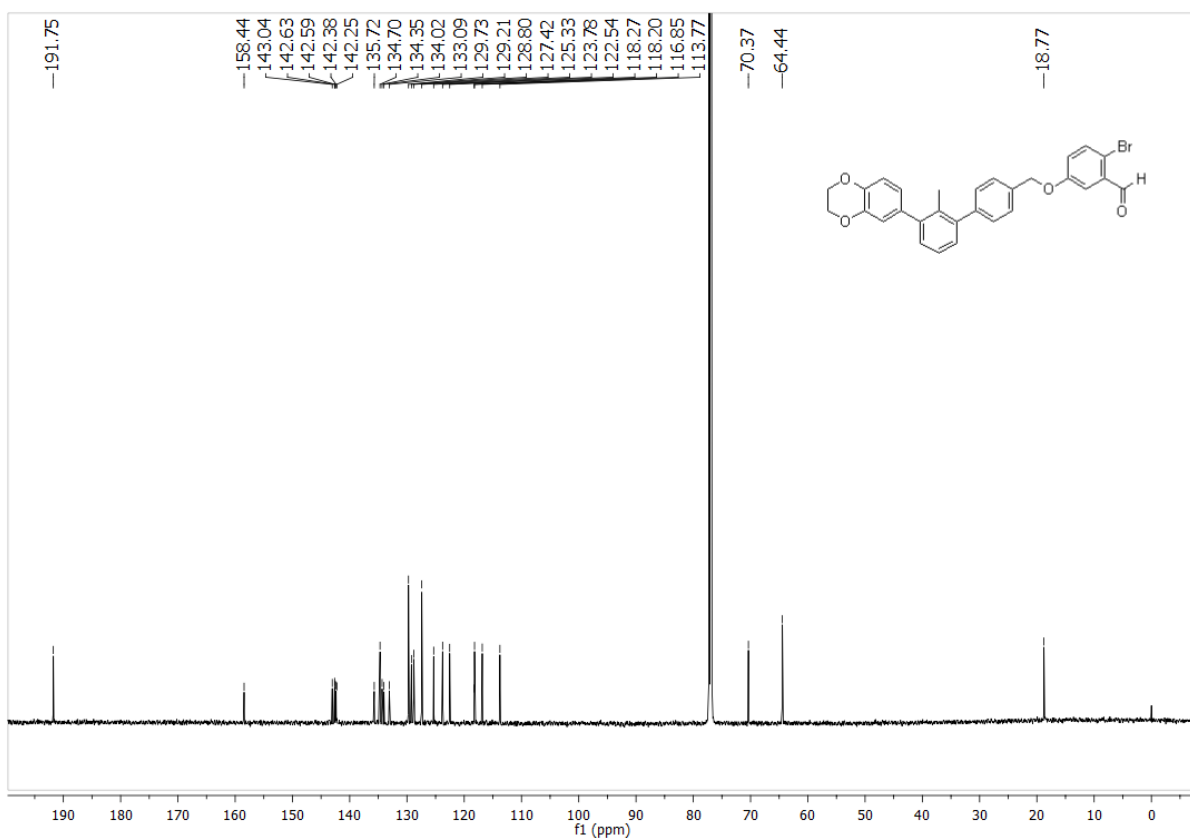

**5d. 5-((3'-(benzo-1,4-dioxan-6-yl)-2'-methyl-[1,1'-biphenyl]-4-yl)methoxy)-(pyridin-3-yl)benzaldehyde**

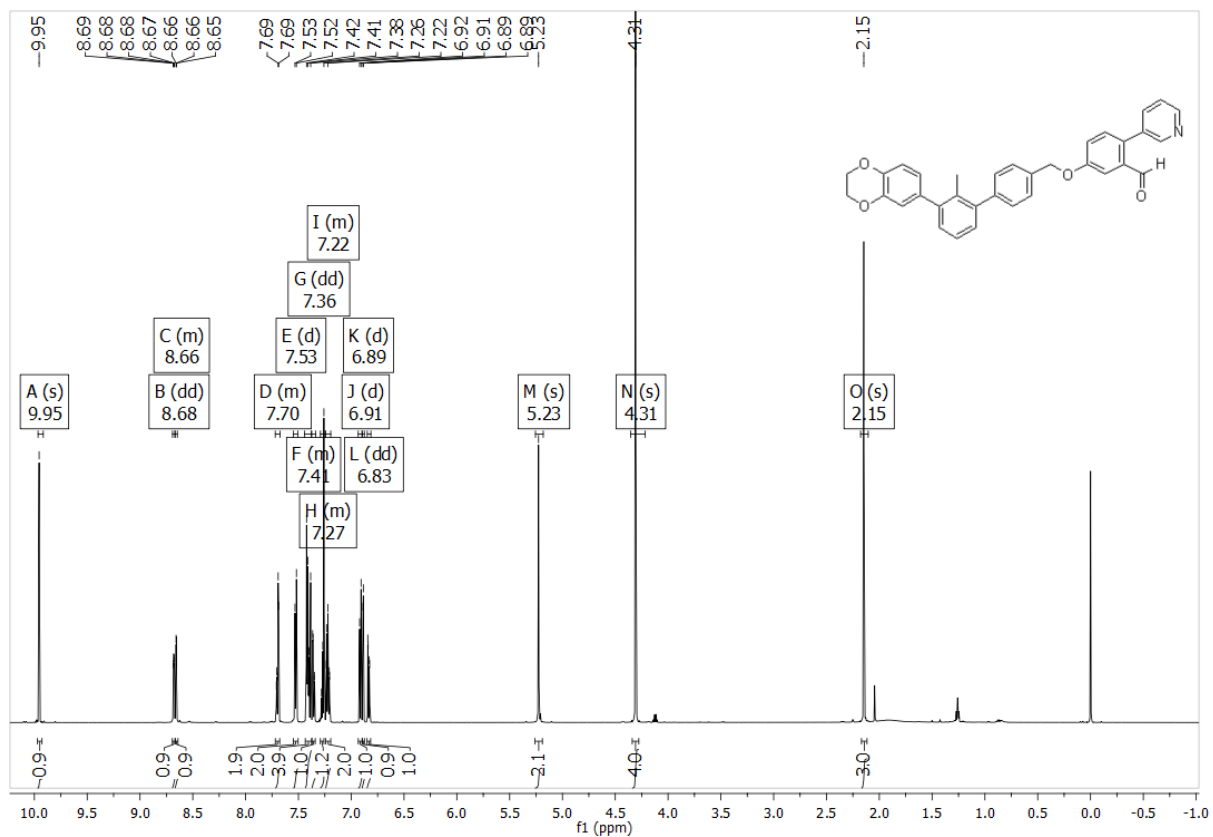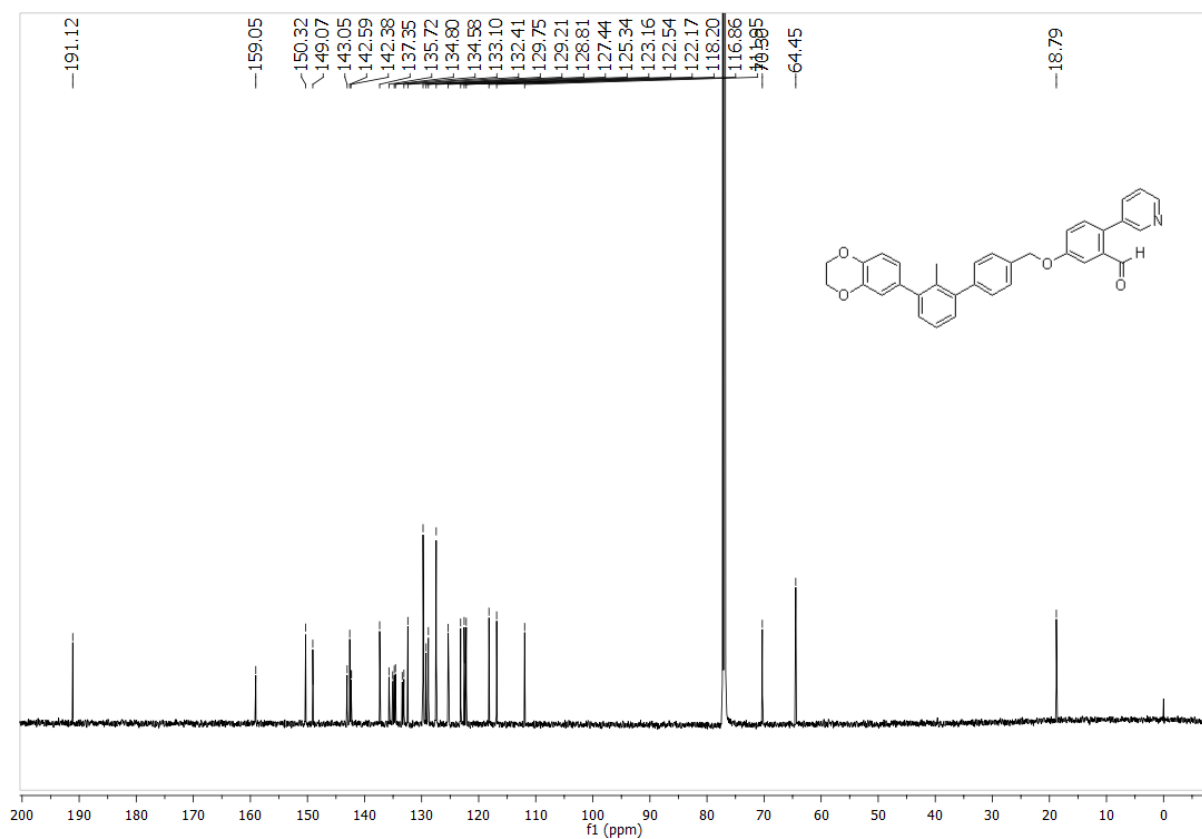

5e. methyl 3-((3'-(benzo-1,4-dioxan-6-yl)-2'-methyl-[1,1'-biphenyl]-4-yl)methoxy)isoxazole-5-carboxylate

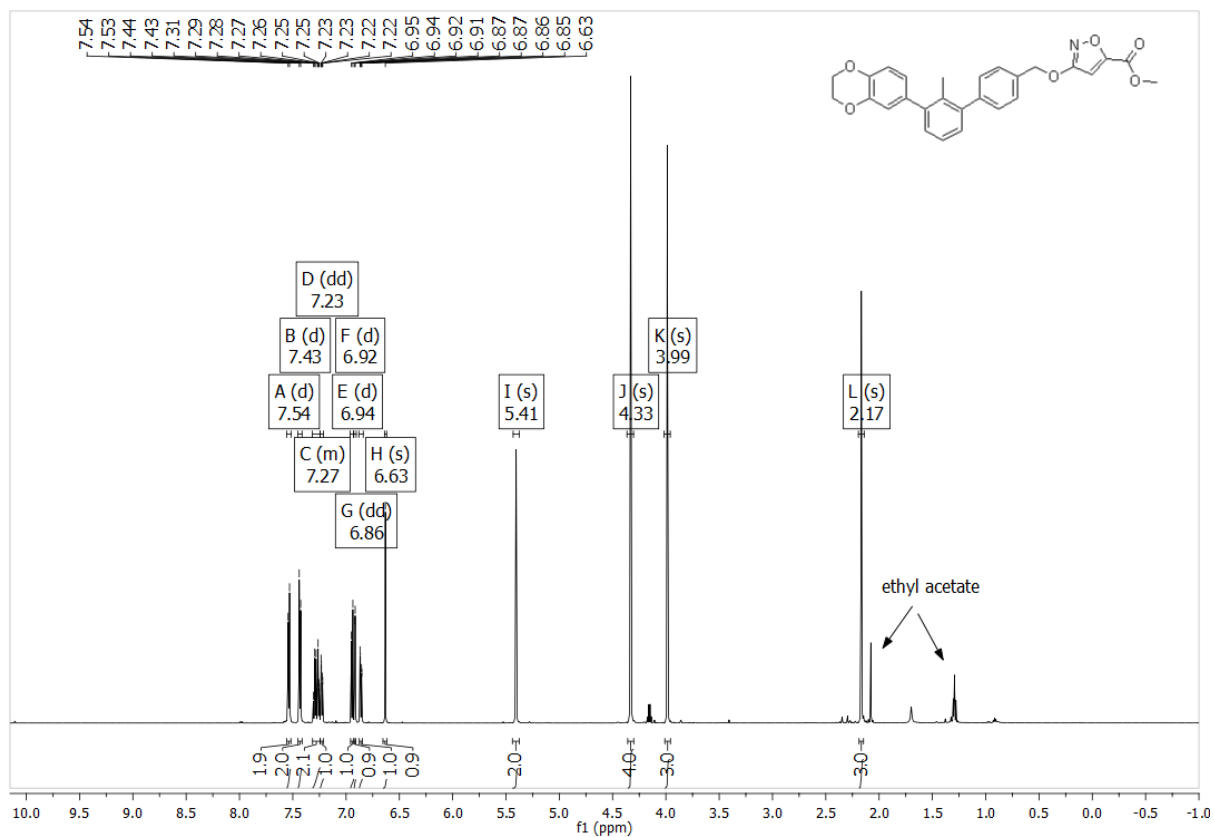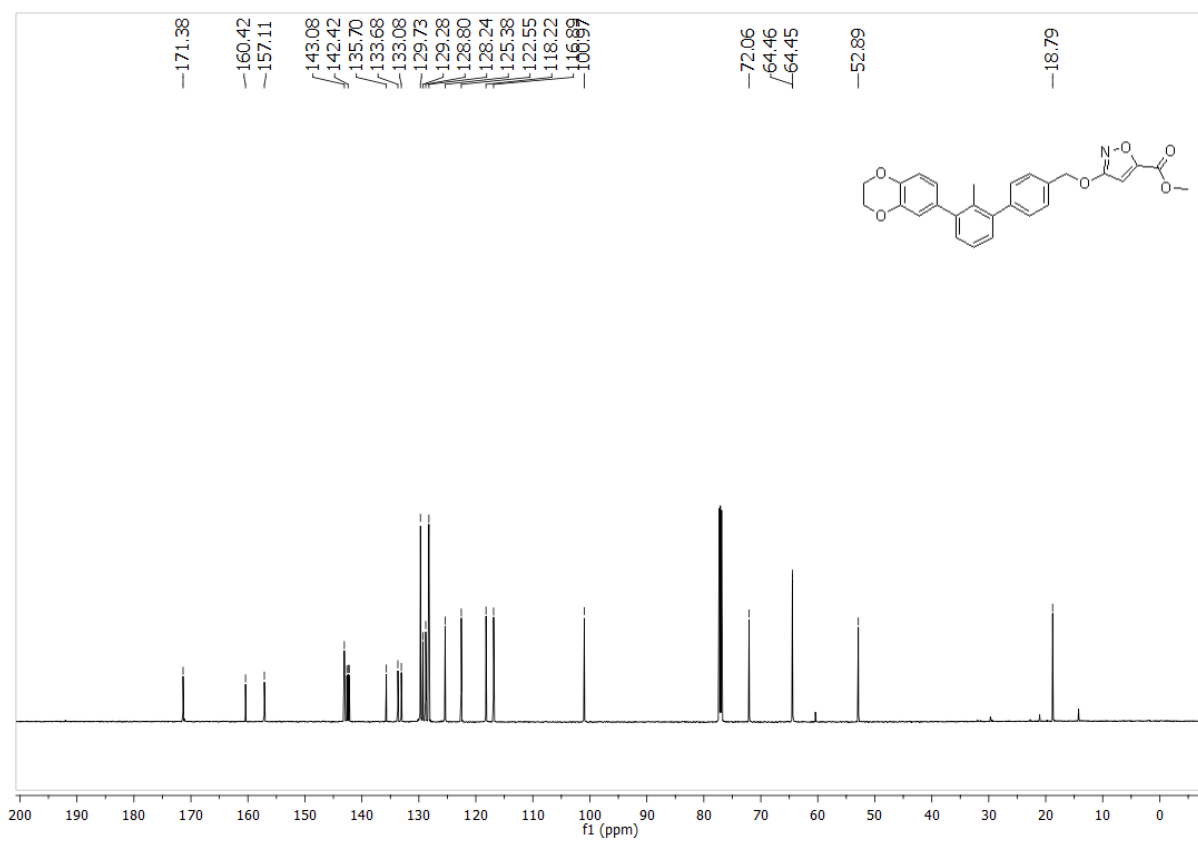

5f. 3-((3'-(benzo-1,4-dioxan-6-yl)-2'-methyl-[1,1'-biphenyl]-4-yl)methoxy)isoxazole-5-carboxylic acid

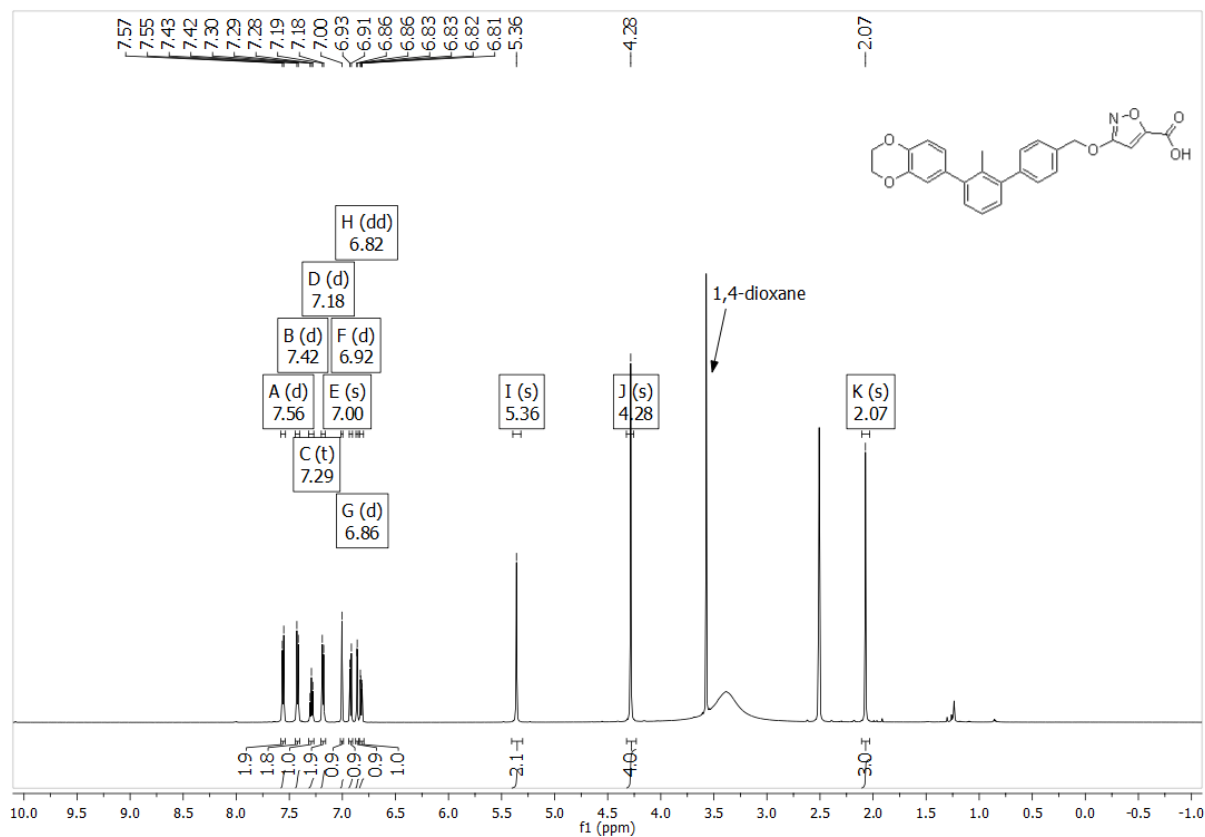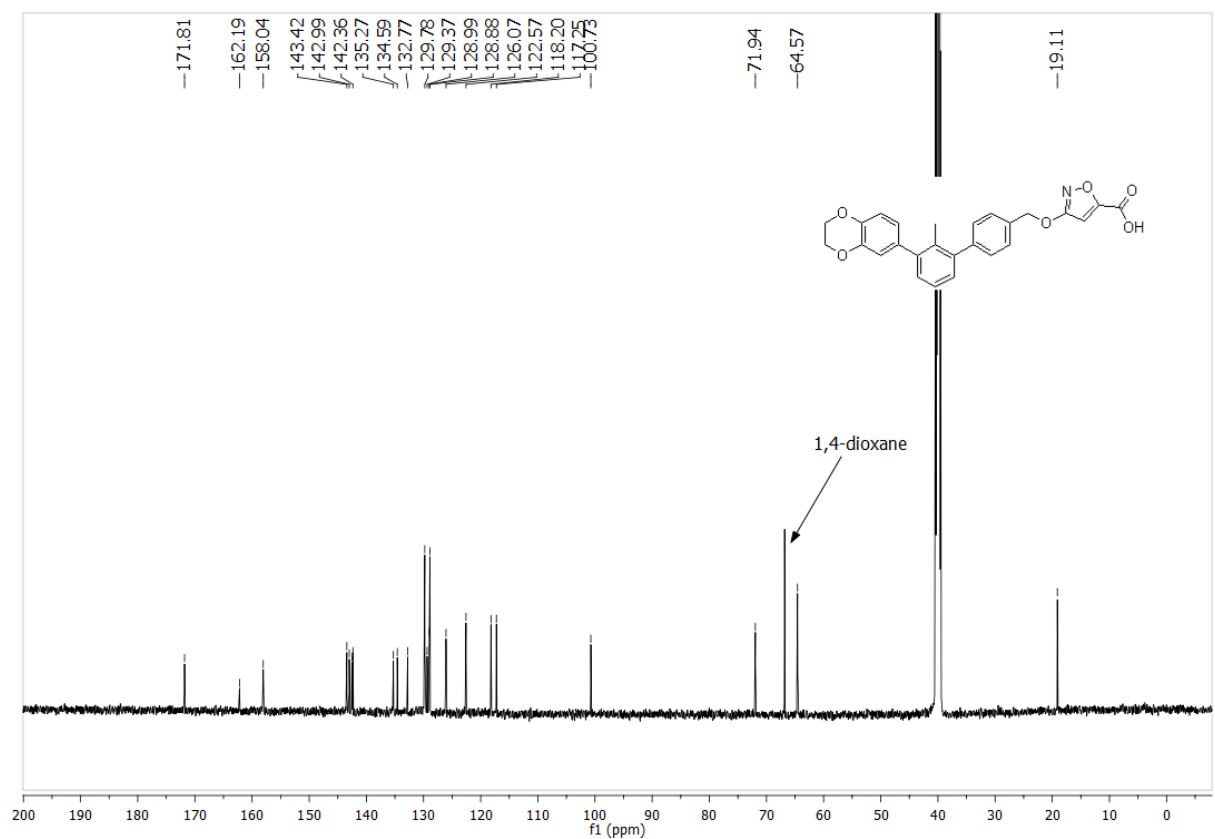

**5g. Methyl 1-((3'-(benzo-1,4-dioxan-6-yl)-2'-methyl-[1,1'-biphenyl]-4-yl)methyl)-1H-1,2,3-triazole-4-carboxylate**

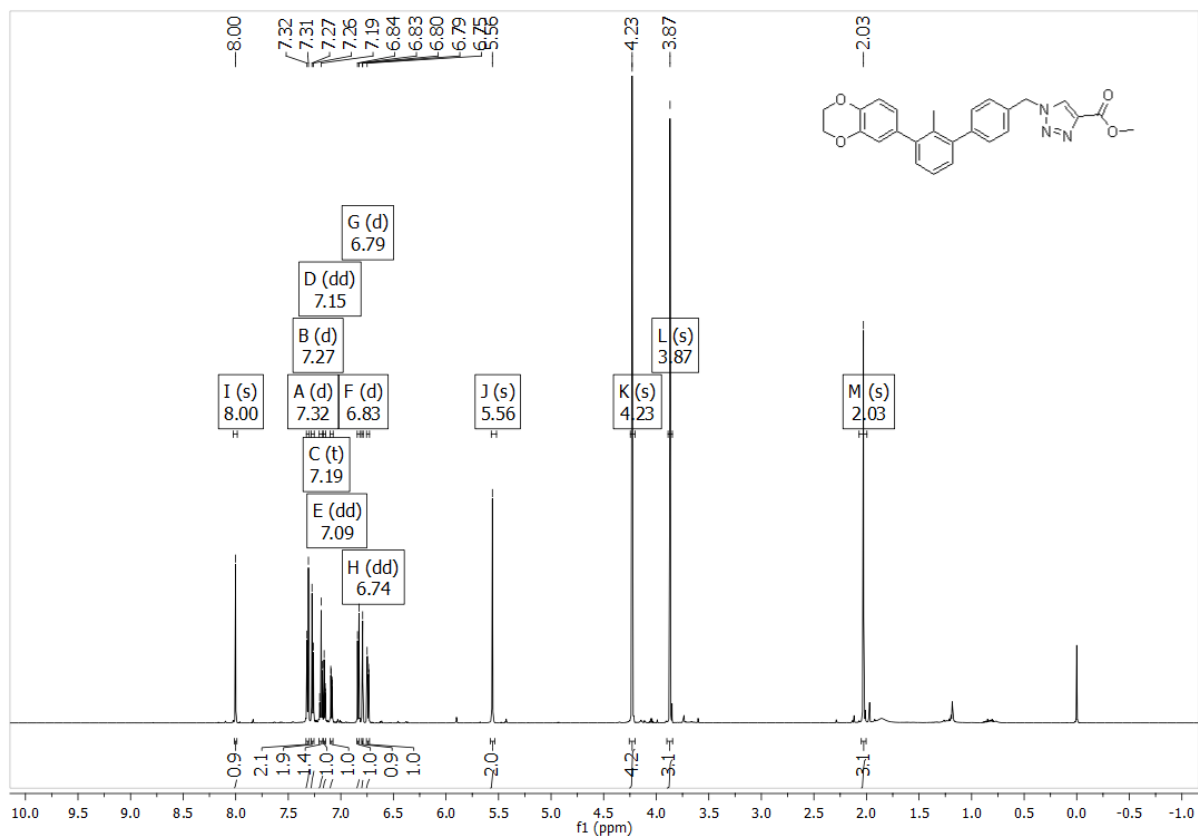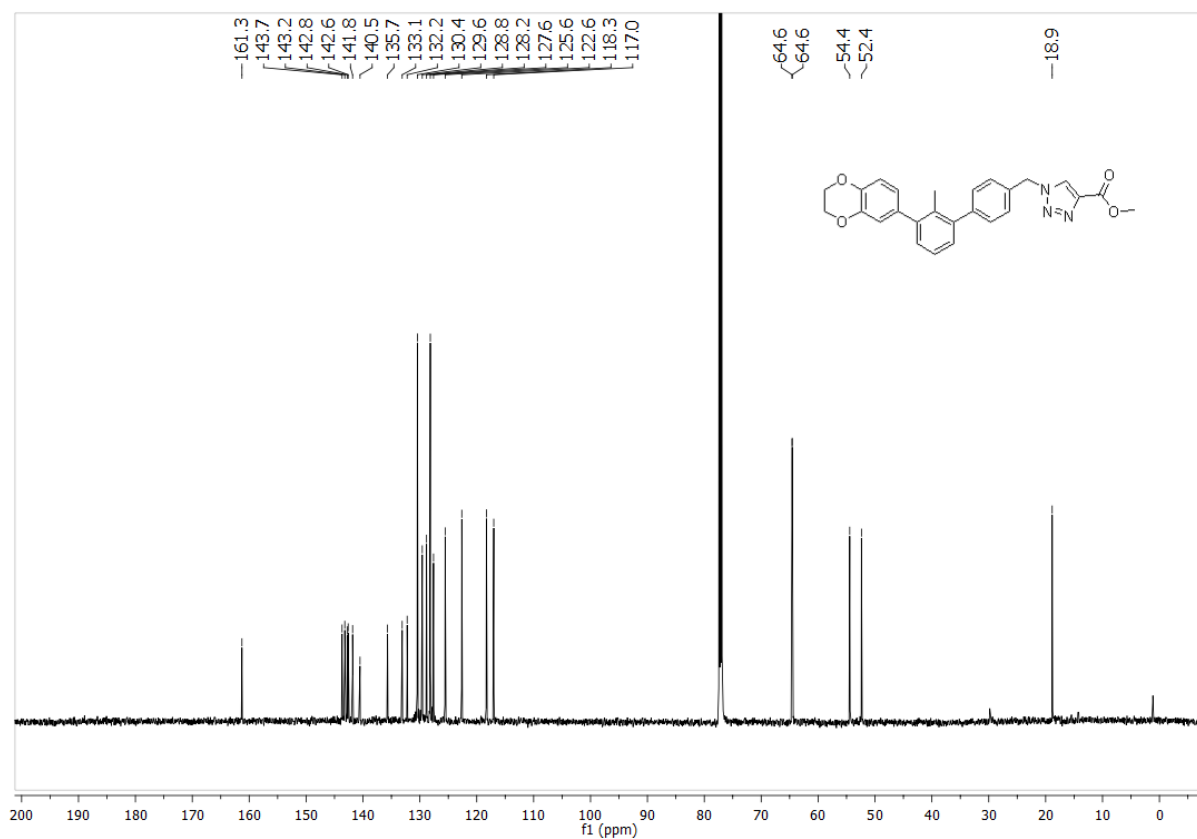

**5h. 1-((3'-(benzo-1,4-dioxan-6-yl)-2'-methyl-[1,1'-biphenyl]-4-yl)methyl)-1H-1,2,3-triazole-4-carboxylic acid**

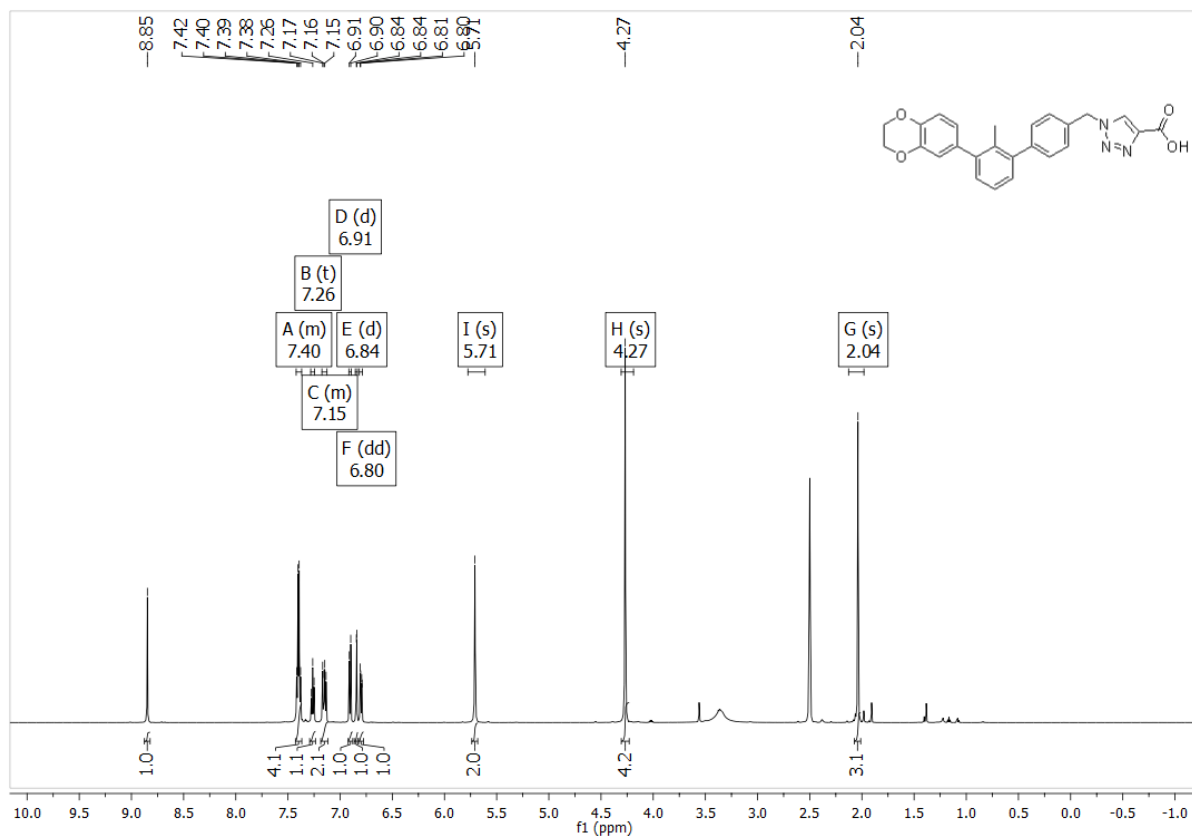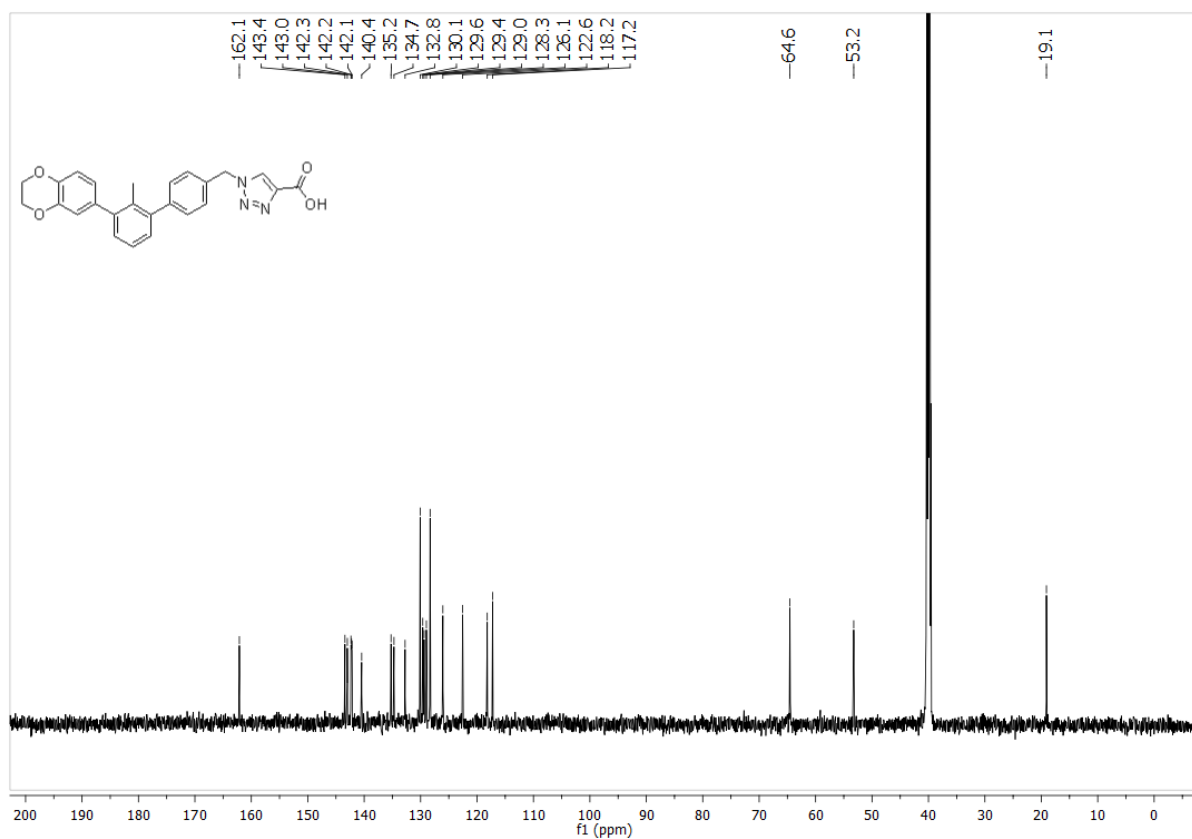

5i. methyl 3-((3'-(benzo-1,4-dioxan-6-yl)-2'-methyl-[1,1'-biphenyl]-3-yl)methoxy)benzoate

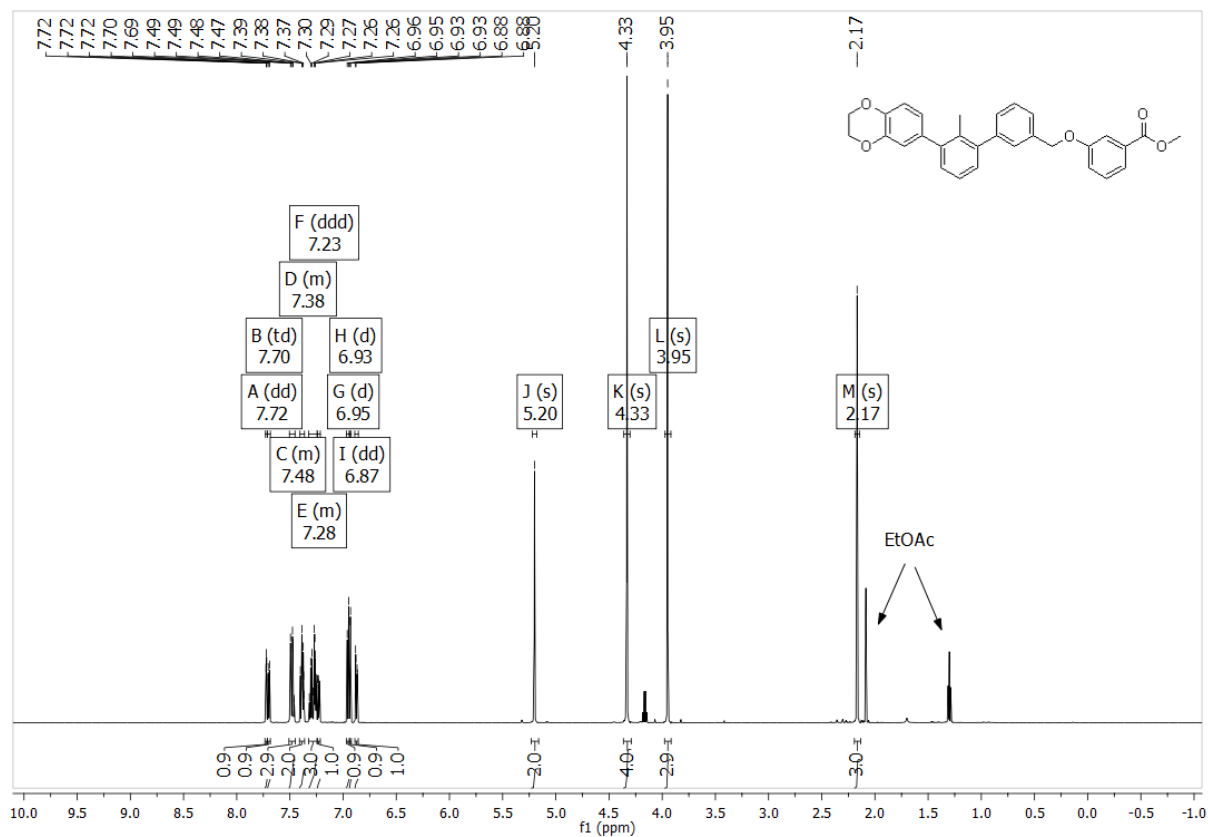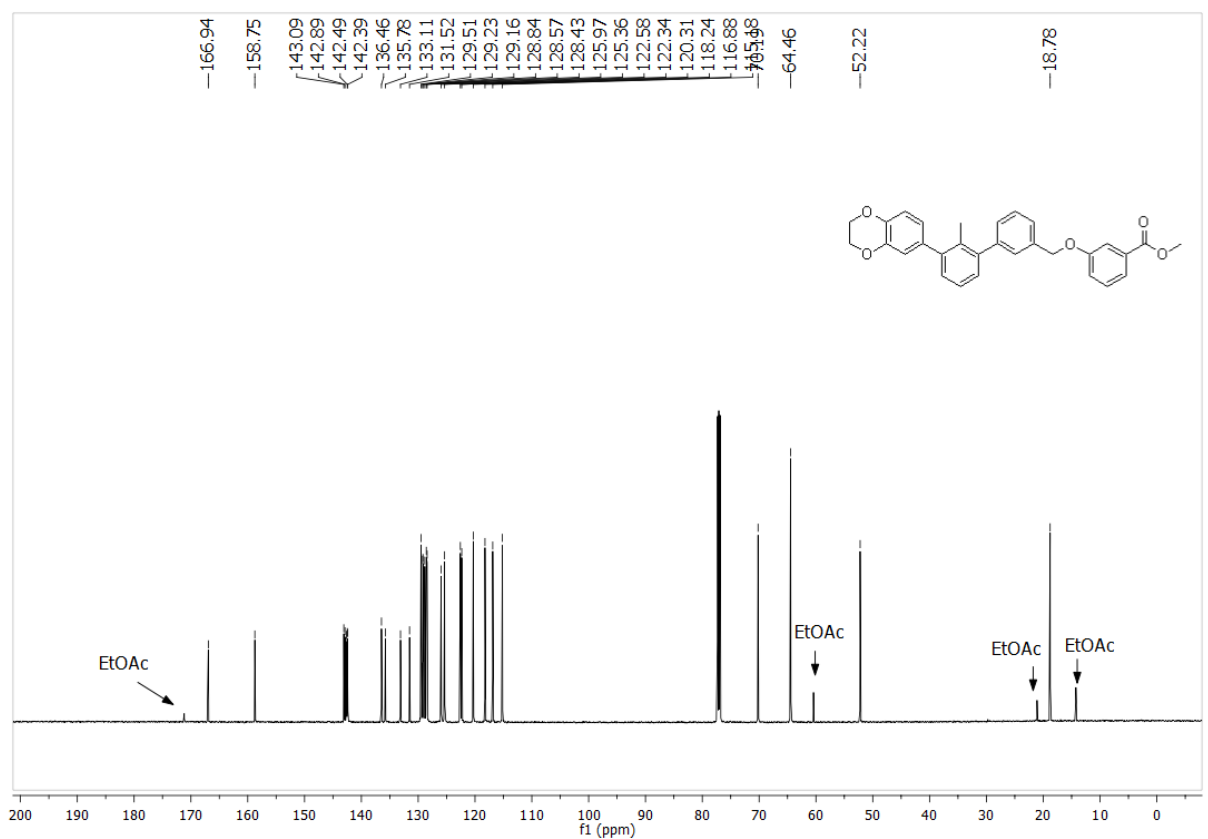

5j. 3-((3'-(benzo-1,4-dioxan-6-yl)-2'-methyl-[1,1'-biphenyl]-3-yl)methoxy)benzoic acid

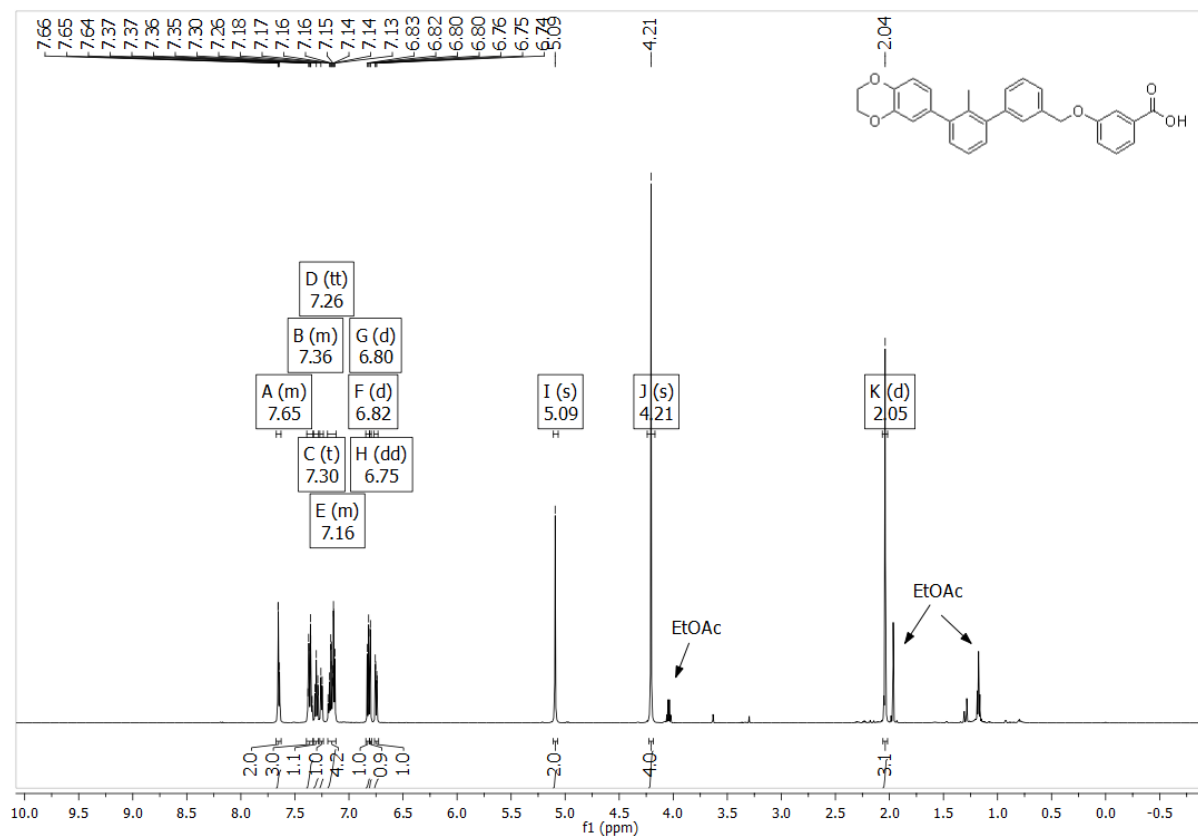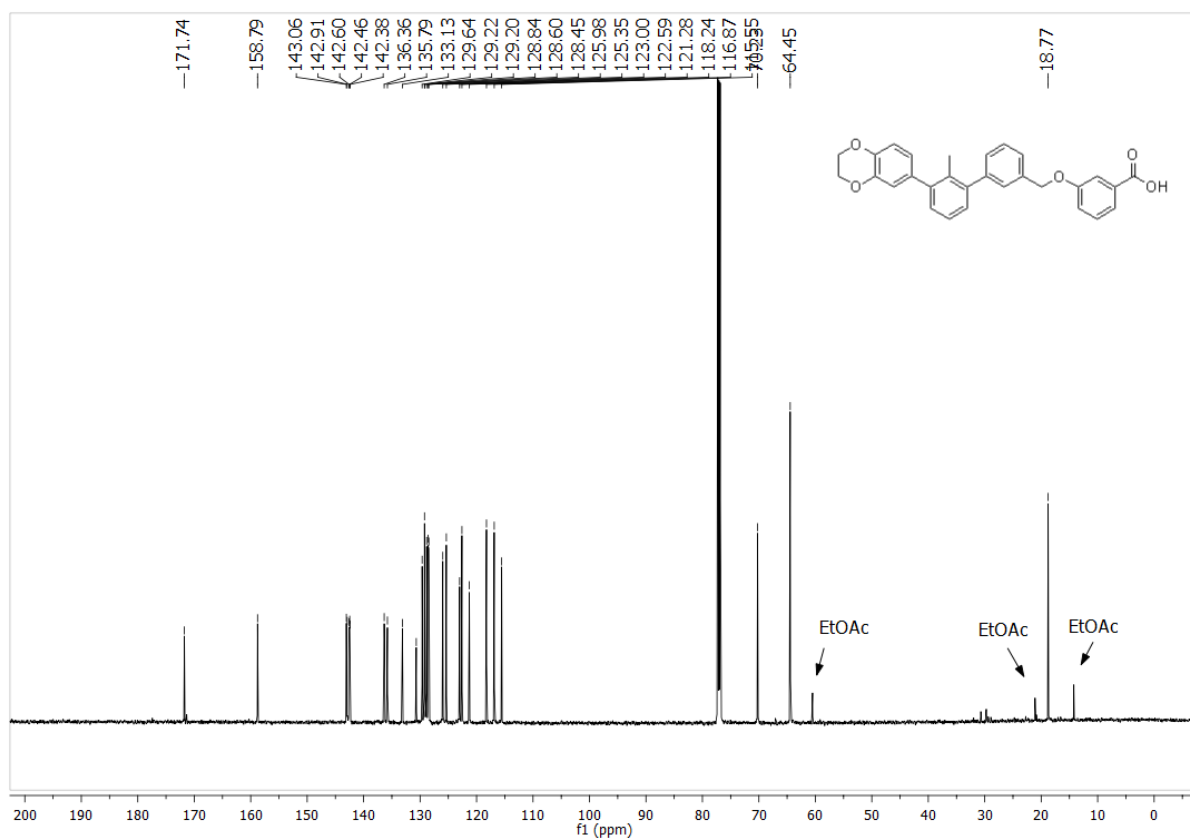



5k. 2-bromo-5-((3'-(benzo-1,4-dioxan-6-yl)-2'-methyl-[1,1'-biphenyl]-3-yl)methoxy)benzaldehyde

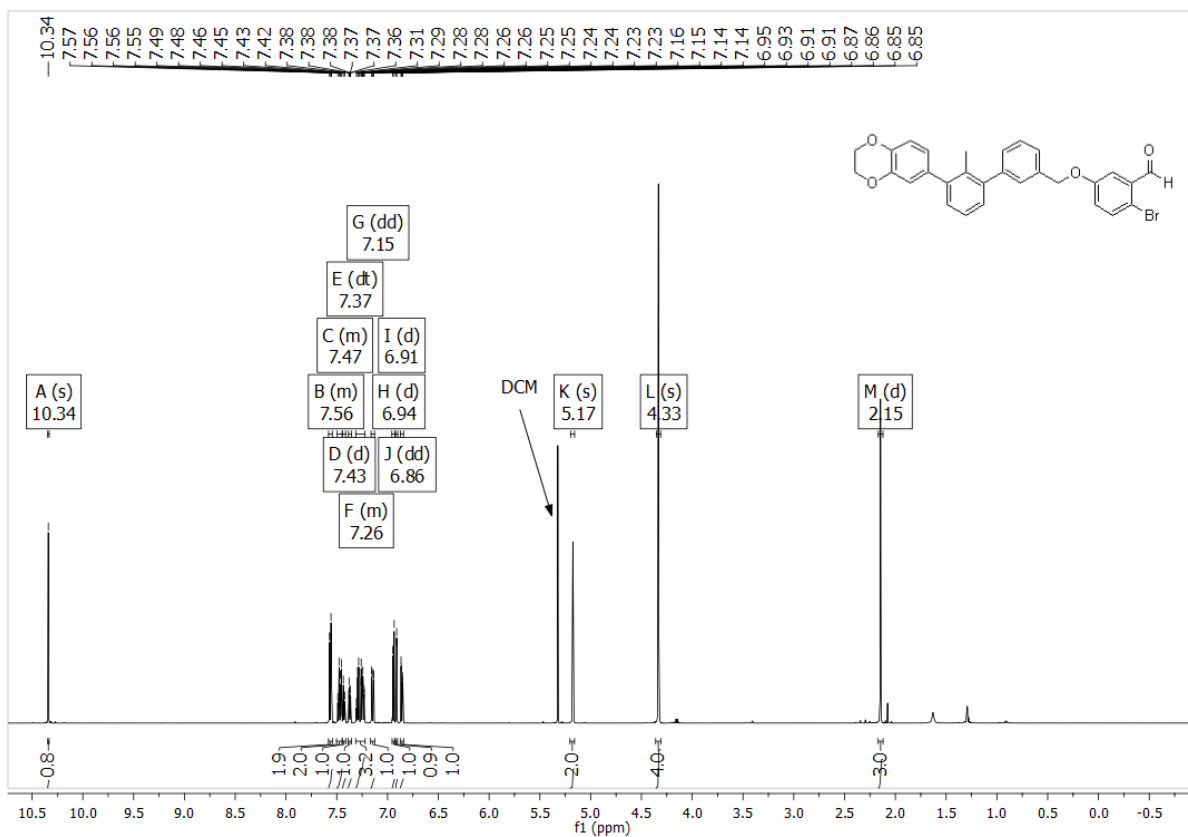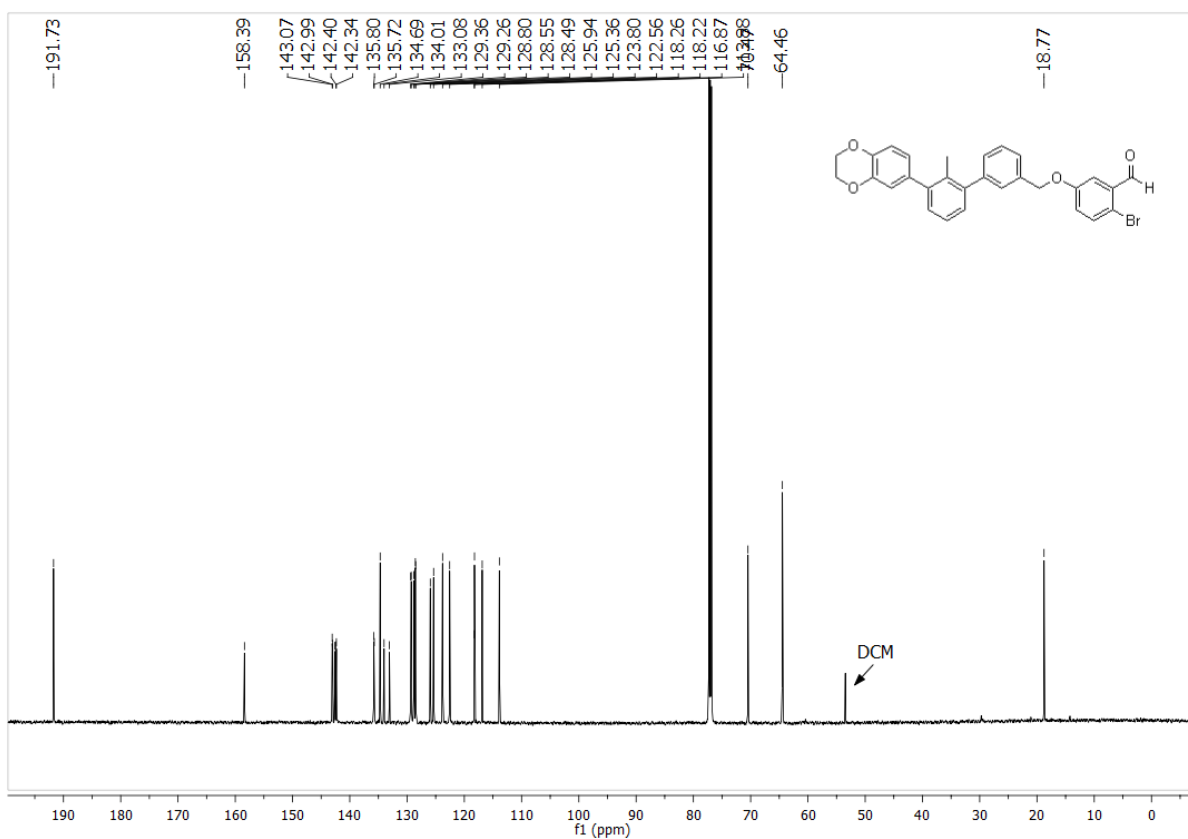

**5I. 5-((3'-(benzo-1,4-dioxan-6-yl)-2'-methyl-[1,1'-biphenyl]-3-yl)methoxy)-(pyridin-3-yl)benzaldehyde**

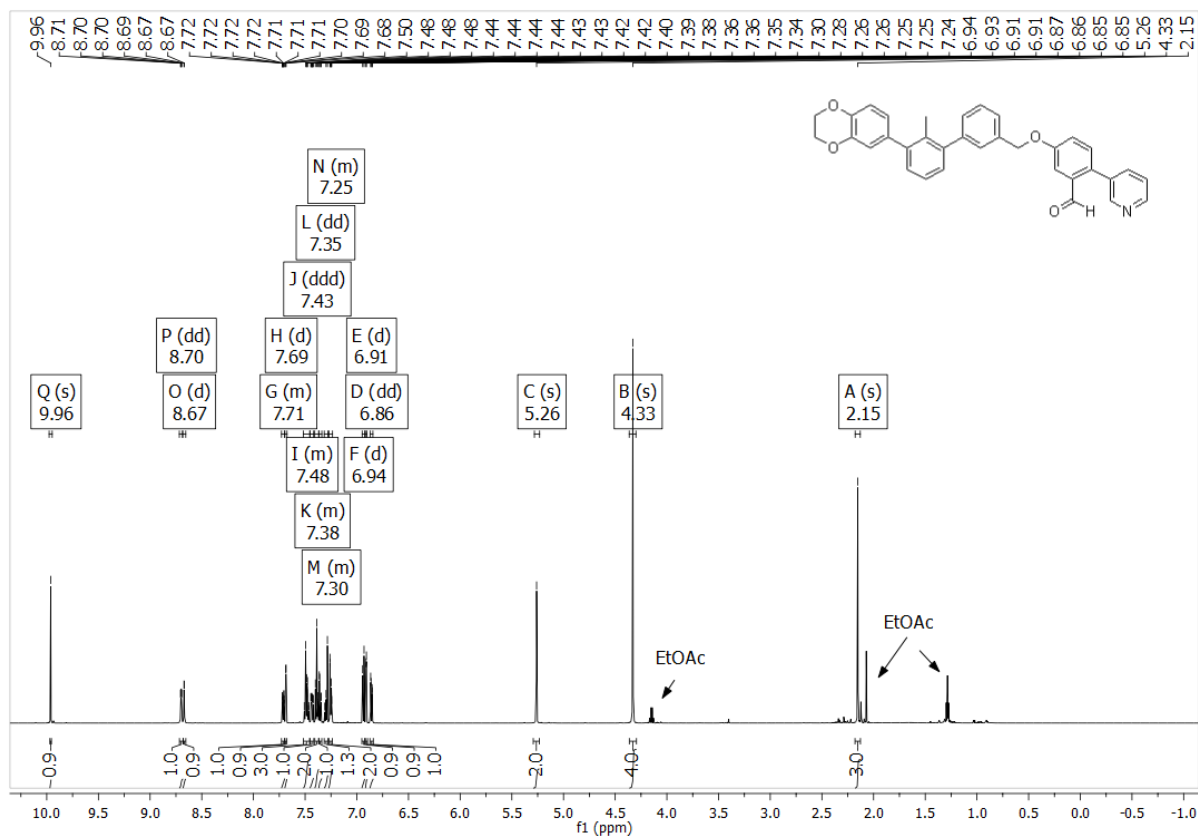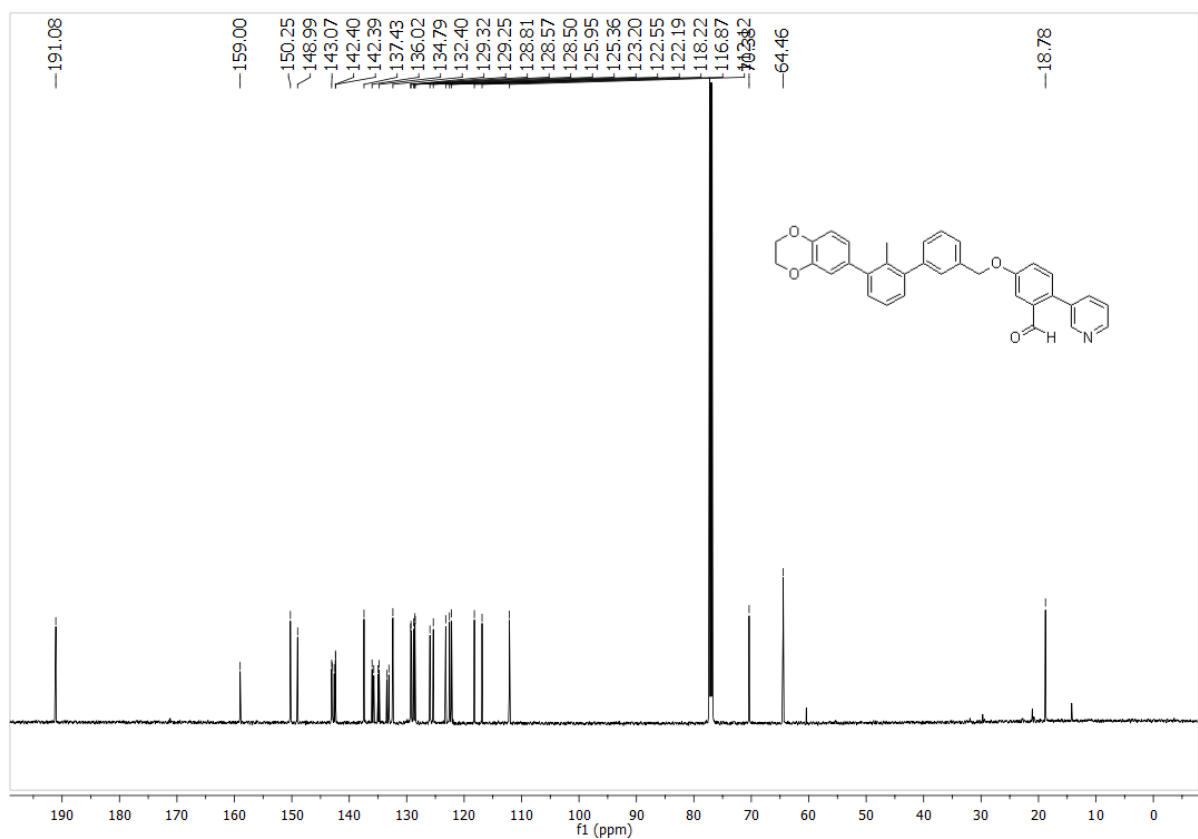

5m. methyl 3-((3'-(benzo-1,4-dioxan-6-yl)-2'-methyl-[1,1'-biphenyl]-3-yl)methoxy)isoxazole-5-carboxylate

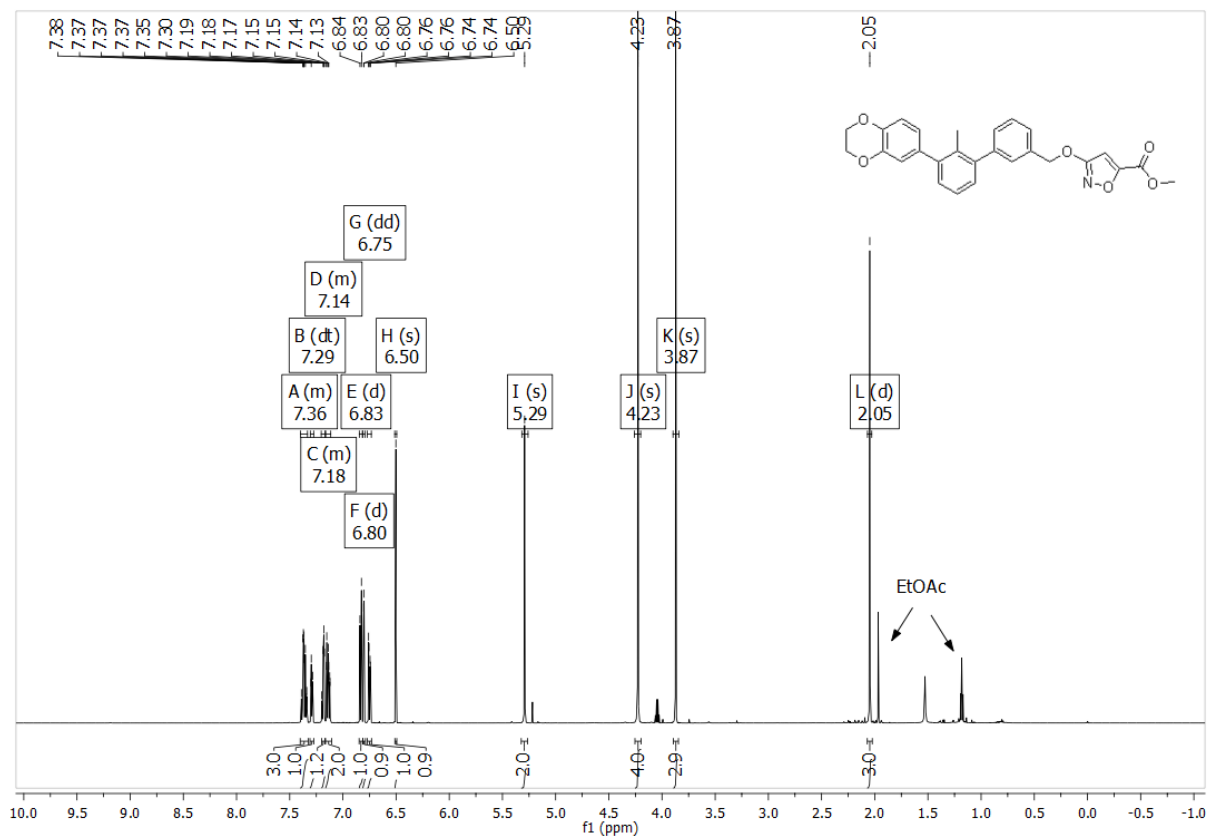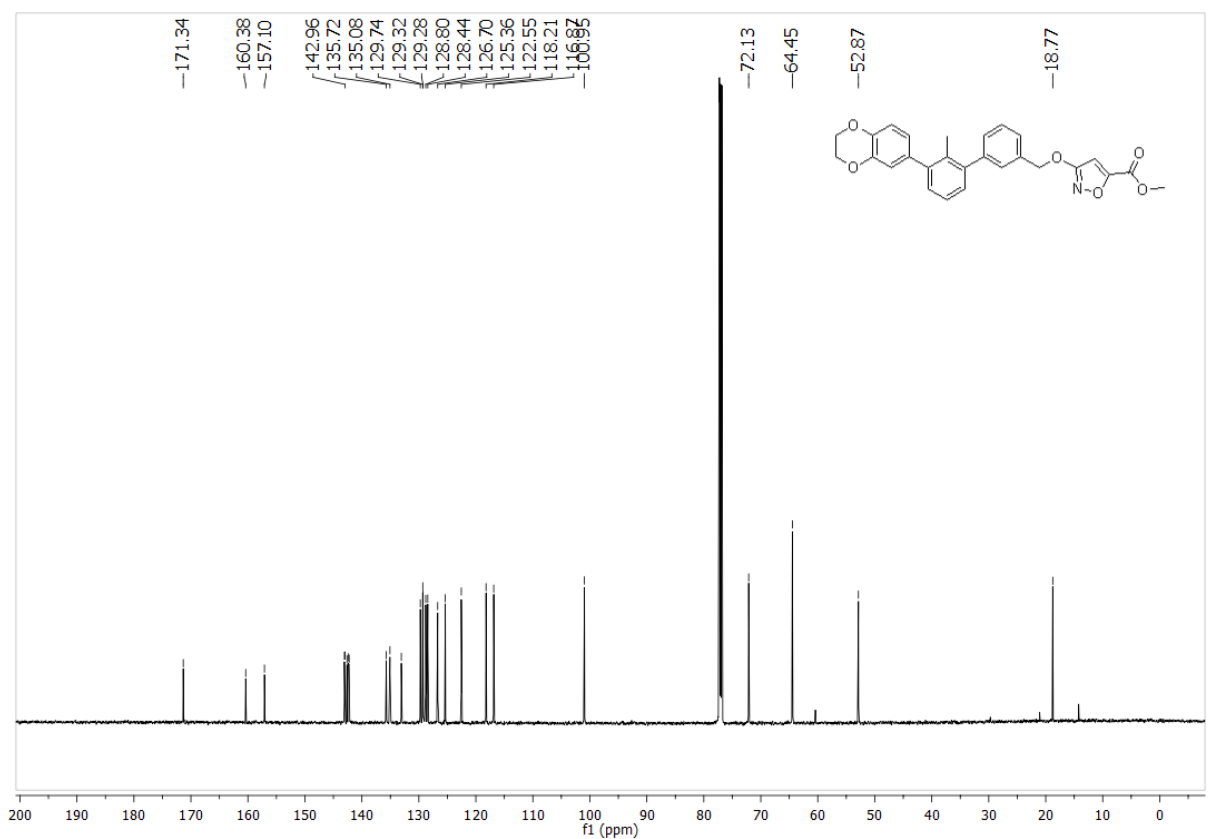

5n. **3-((3'-(benzo-1,4-dioxan-6-yl)-2'-methyl-[1,1'-biphenyl]-3-yl)methoxy)isoxazole-5-carboxylic acid**

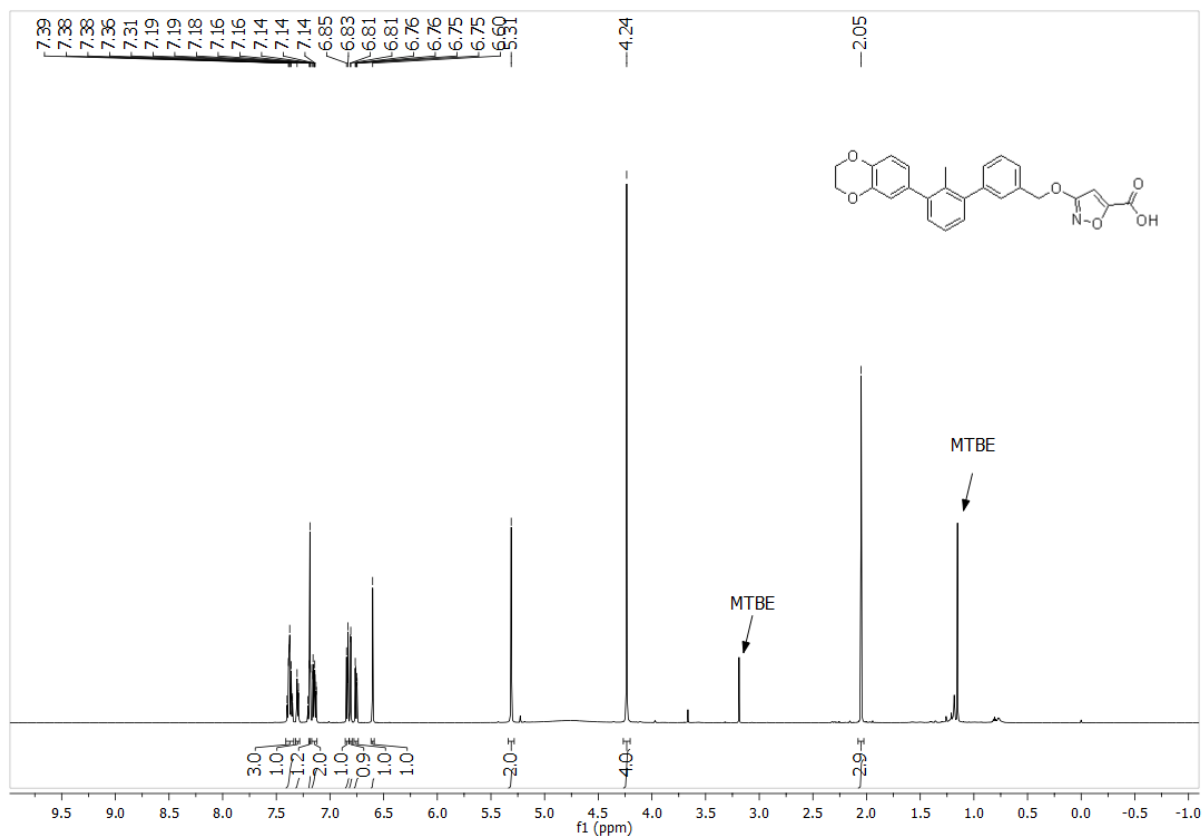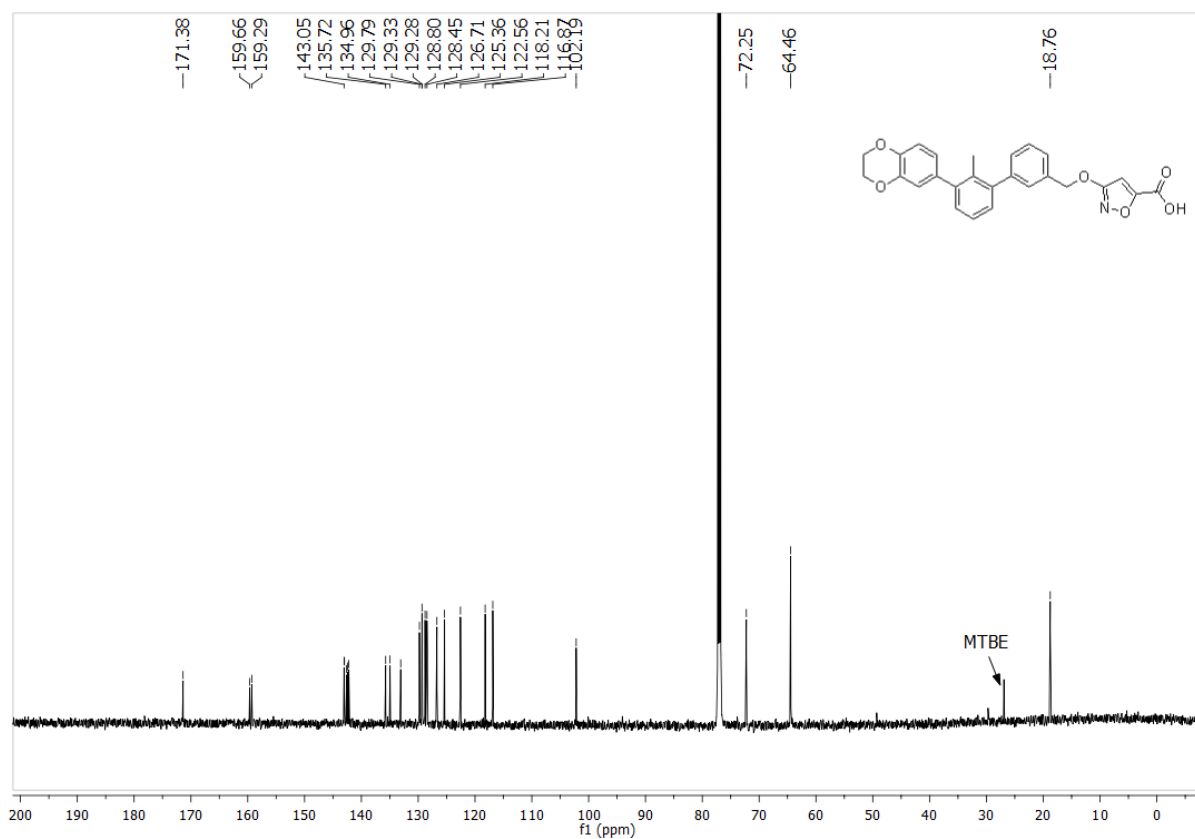

5o. methyl 3-((3'-(benzo-1,4-dioxan-6-yl)-2'-methyl-[1,1'-biphenyl]-2-yl)methoxy)benzoate

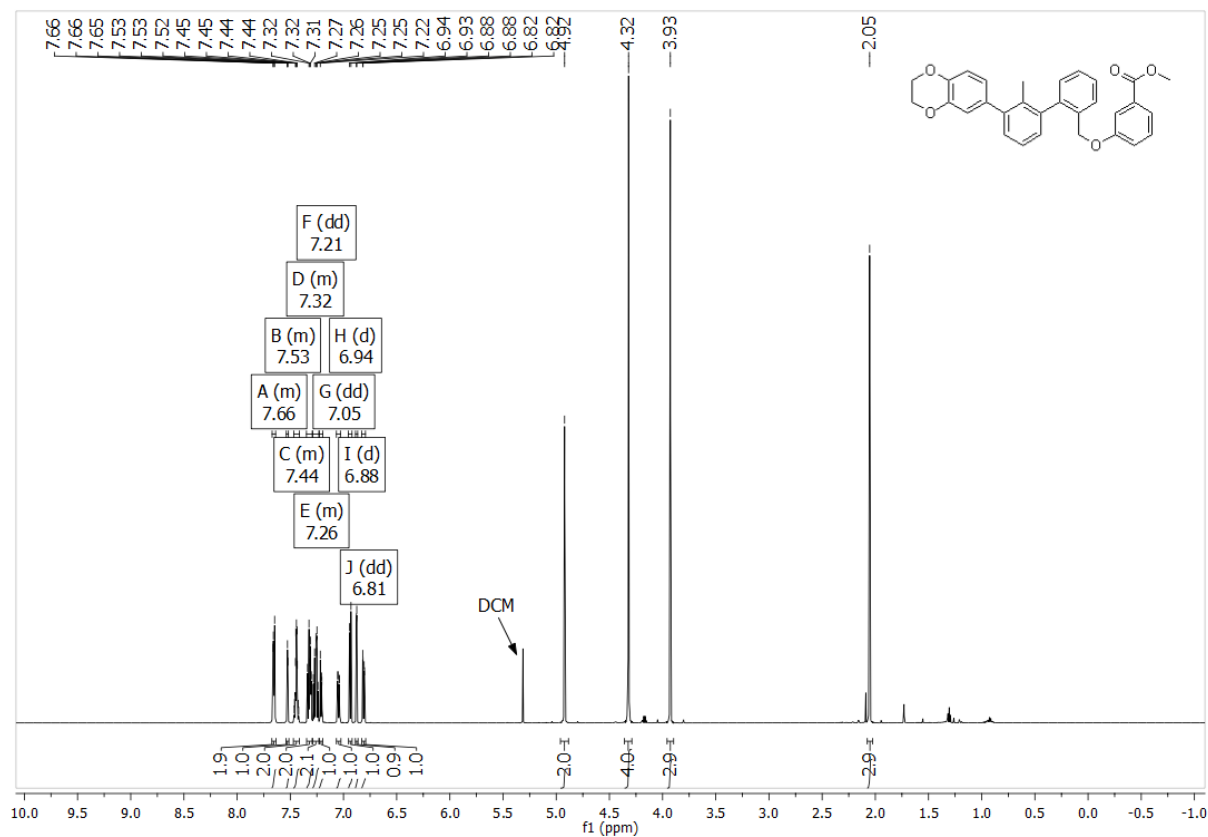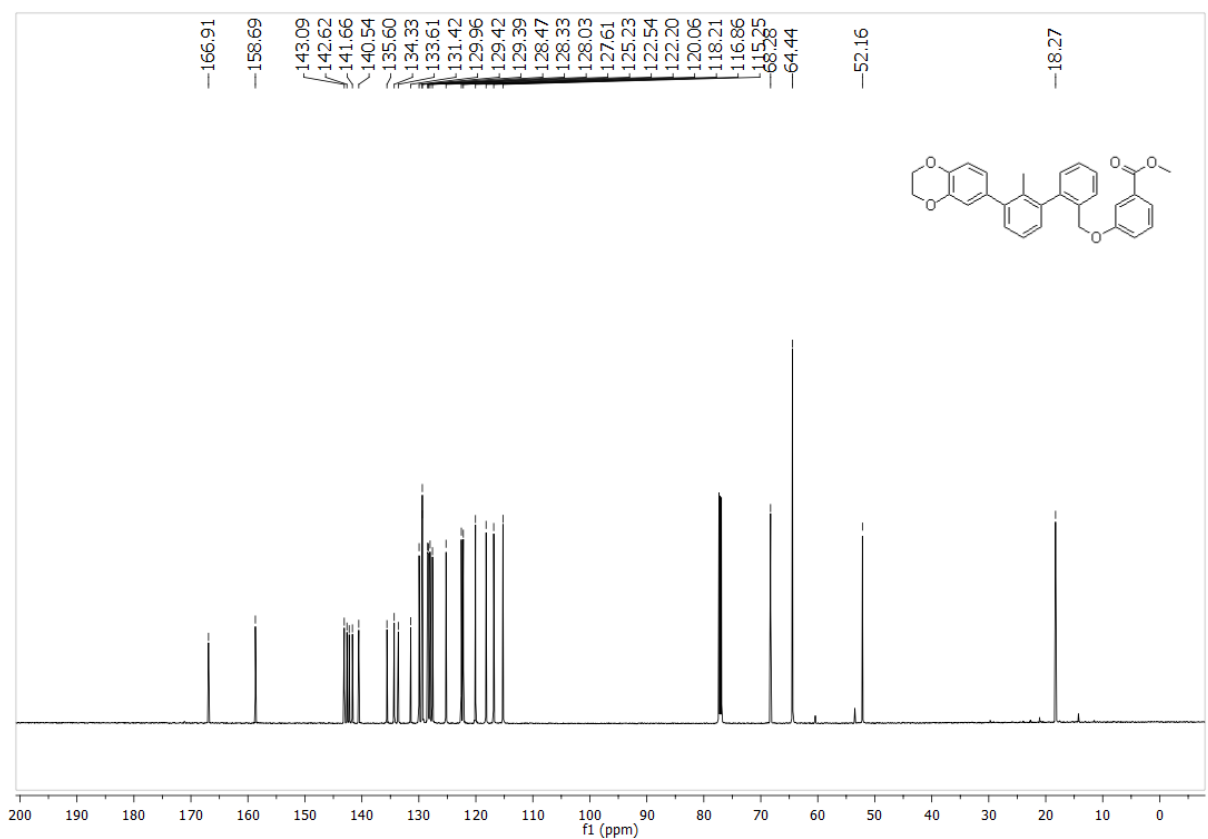



5q. methyl 3-((3'-(benzo-1,4-dioxan-6-yl)-2'-methyl-[1,1'-biphenyl]-2-yl)methoxy)isoxazole-5-carboxylate

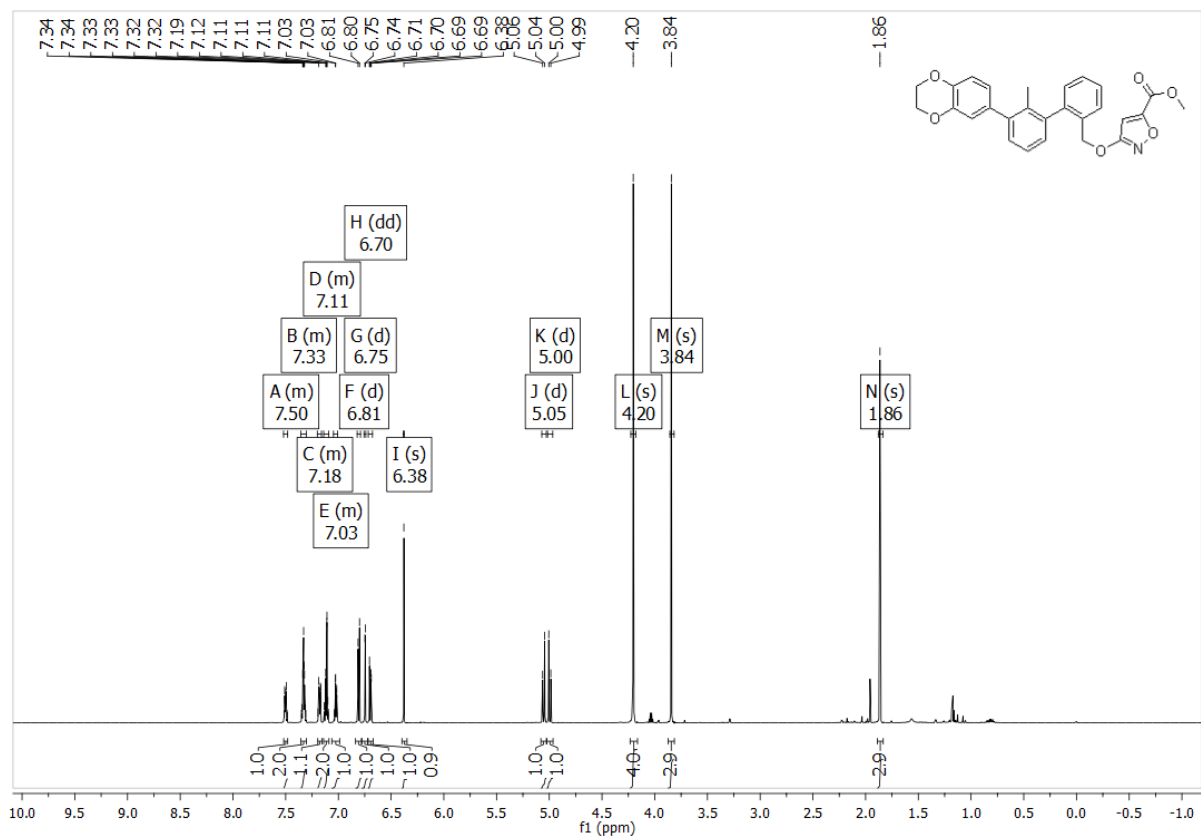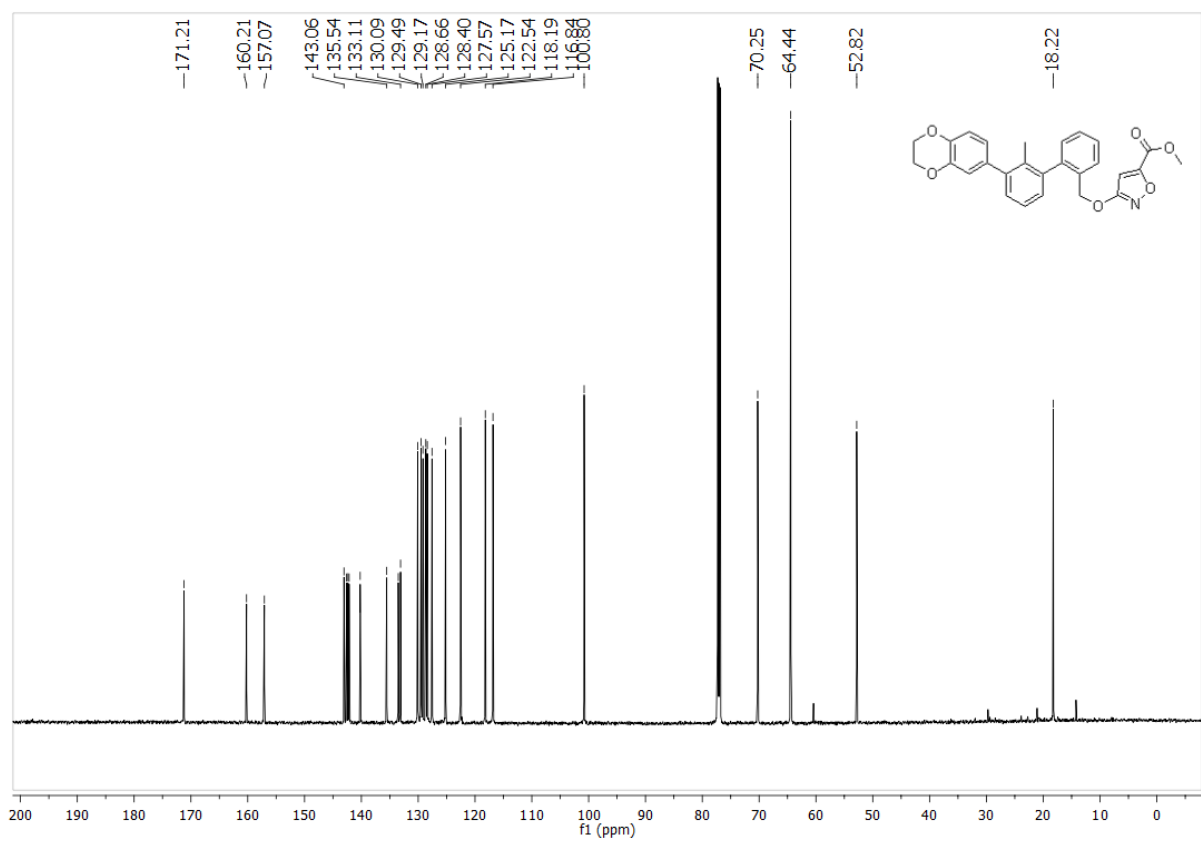

**5r. 3-((3'-(benzo-1,4-dioxan-6-yl)-2'-methyl-[1,1'-biphenyl]-2-yl)methoxy)isoxazole-5-carboxylic acid**

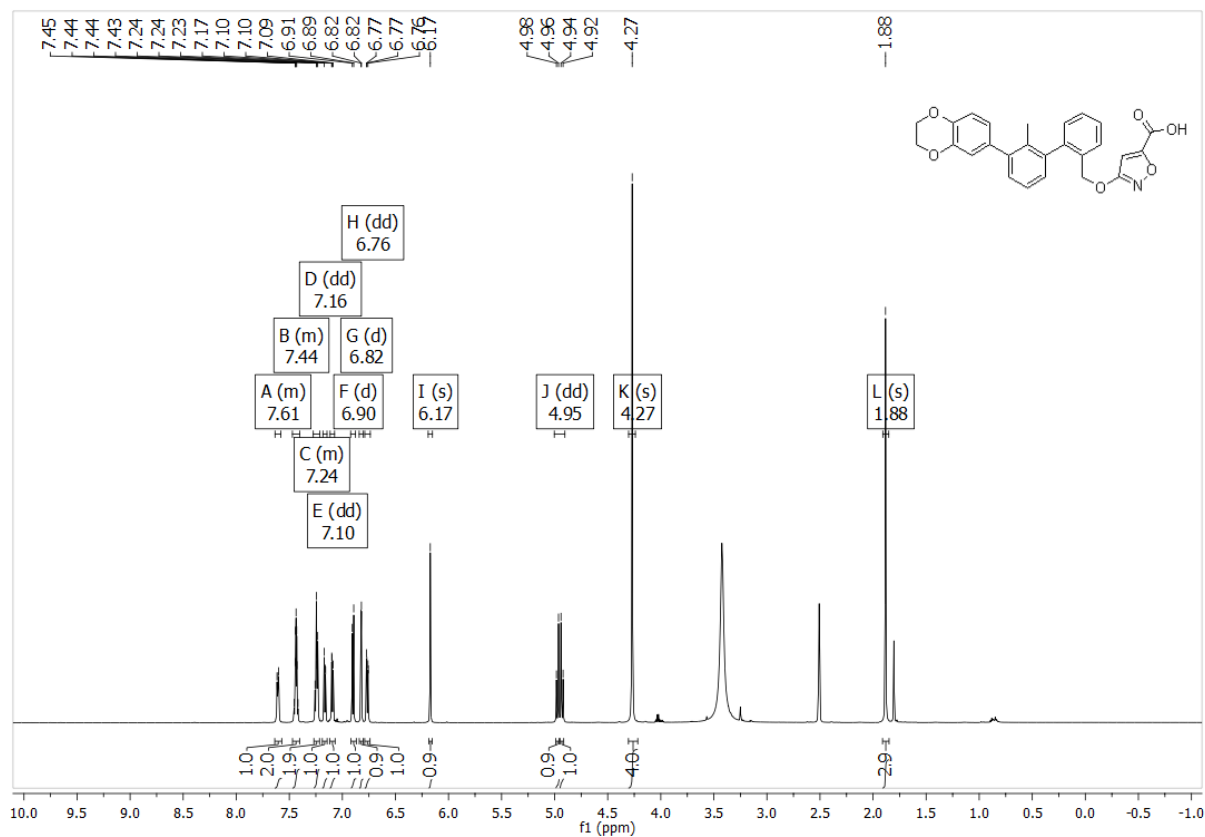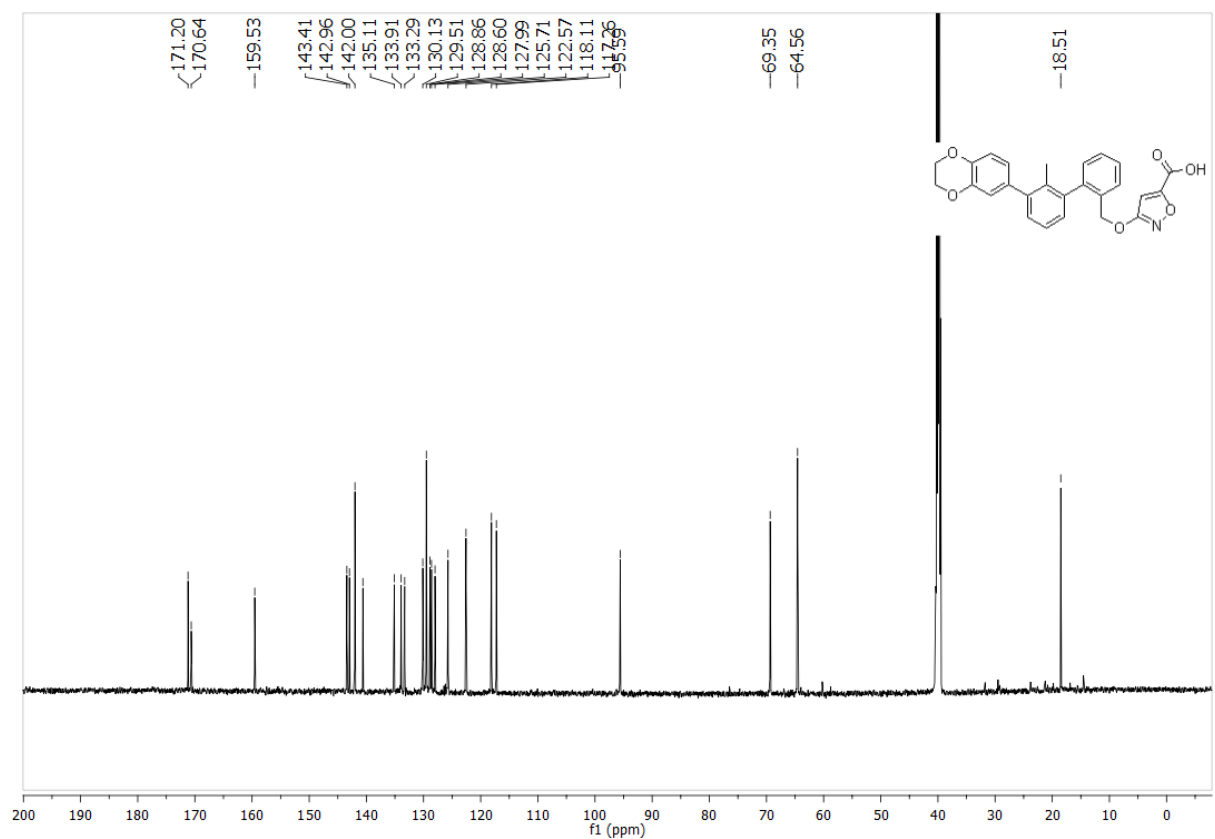



6a. 4-((3'-(benzo-1,4-dioxan-6-yl)-2'-methyl-[1,1'-biphenyl]-4-yl)methyl)morpholine

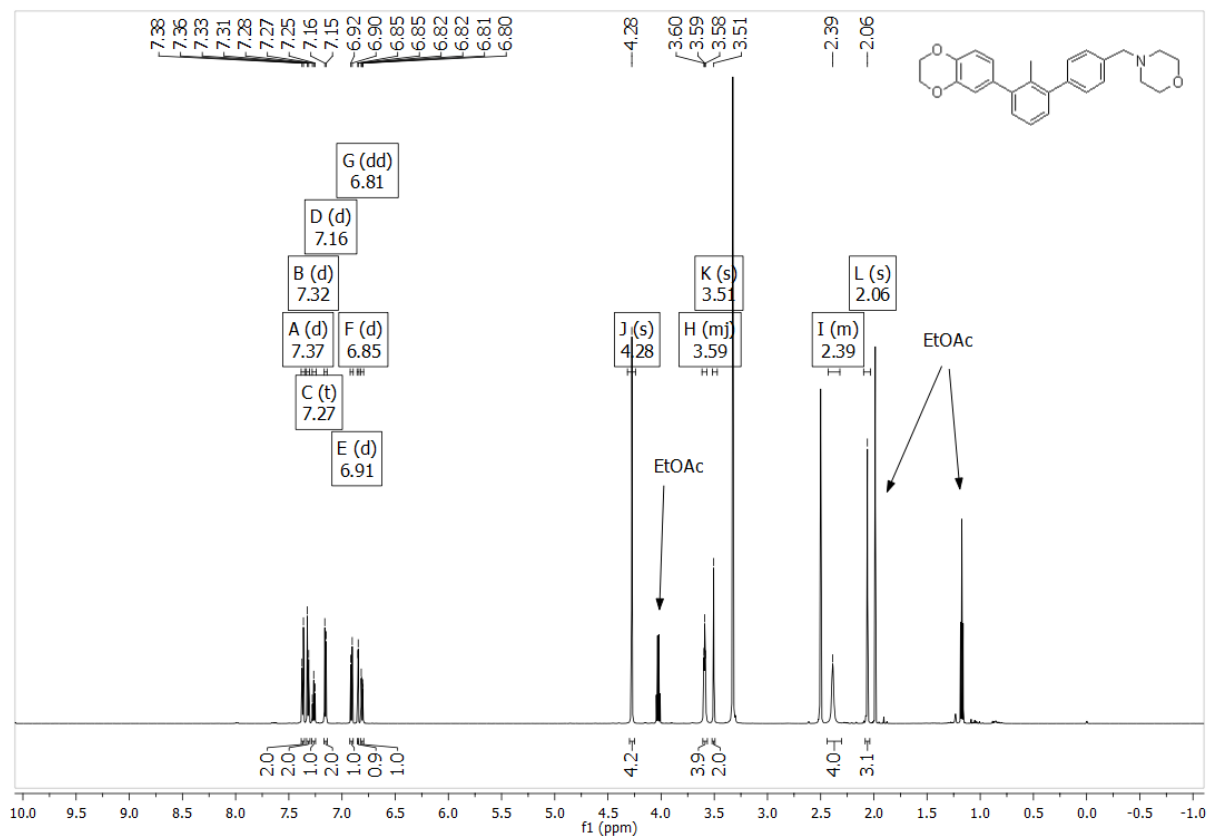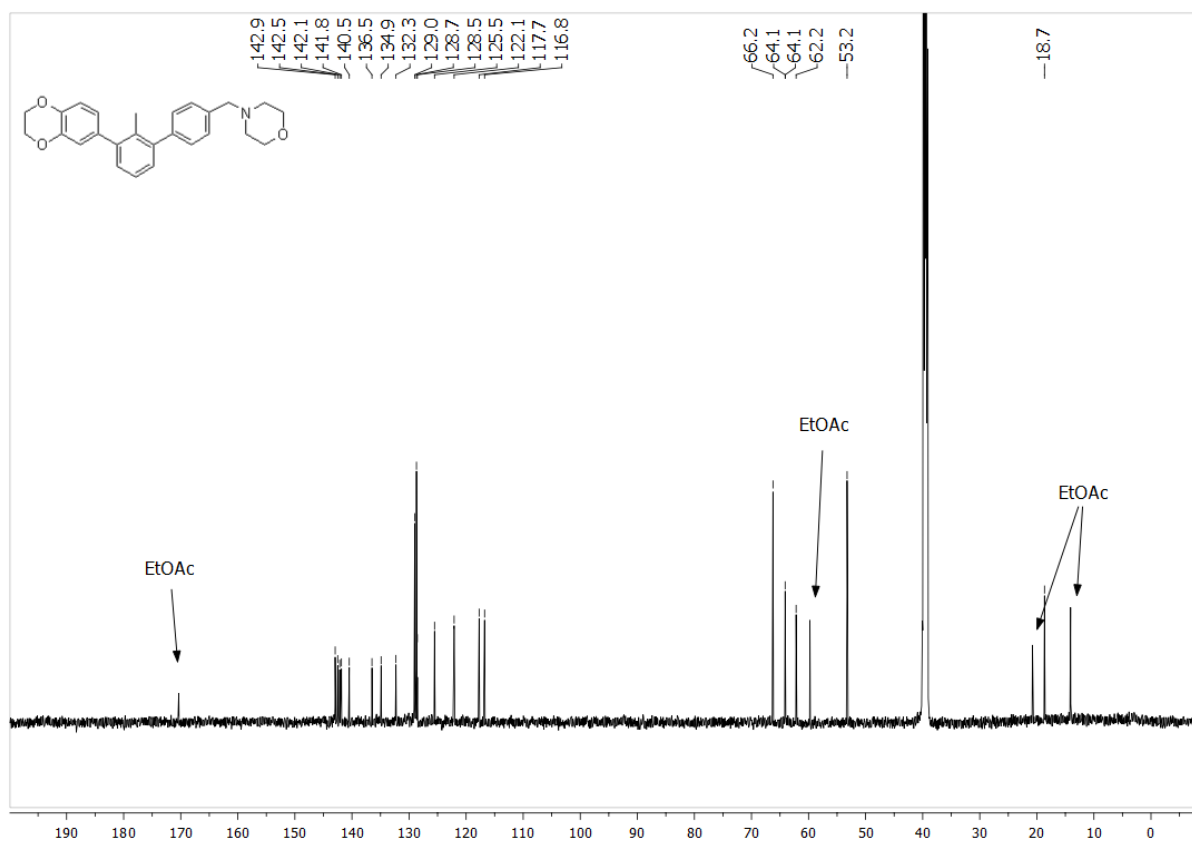

6b. 4-((3'-(benzo-1,4-dioxan-6-yl)-2'-methyl-[1,1'-biphenyl]-4-yl)methyl)piperazine

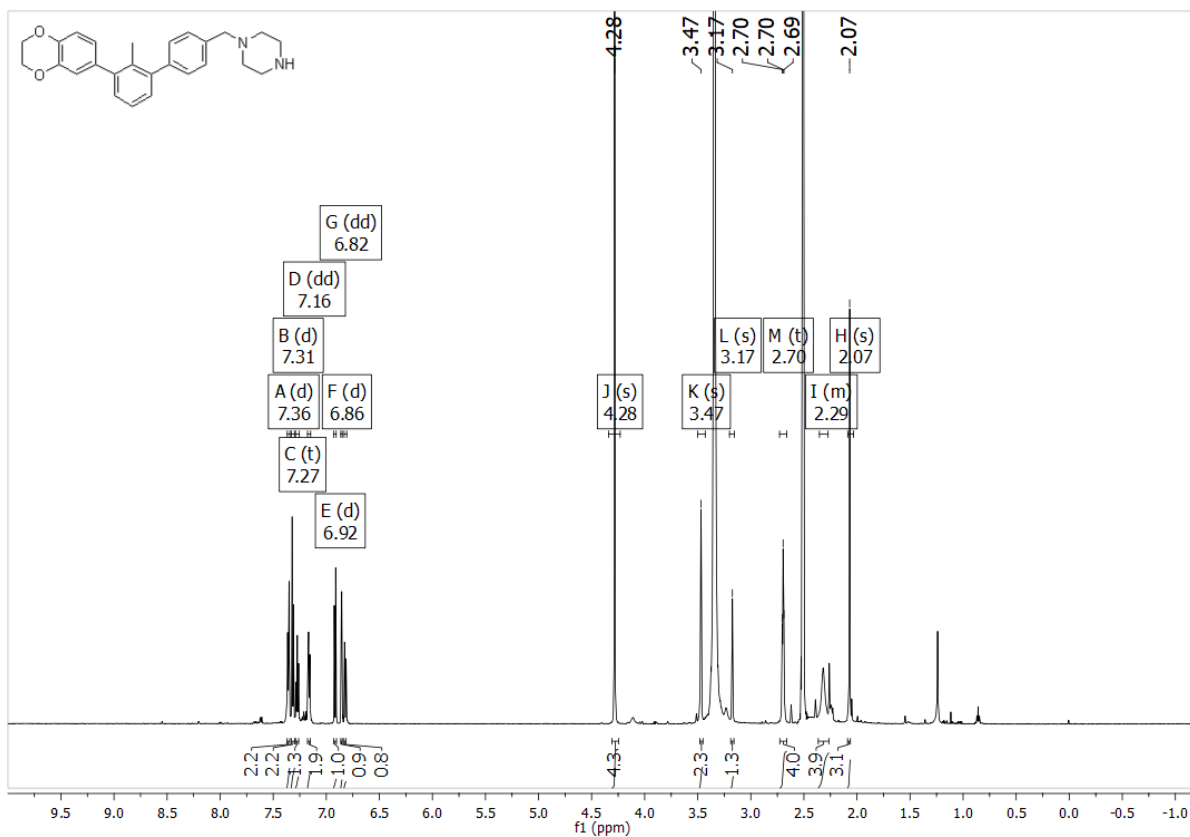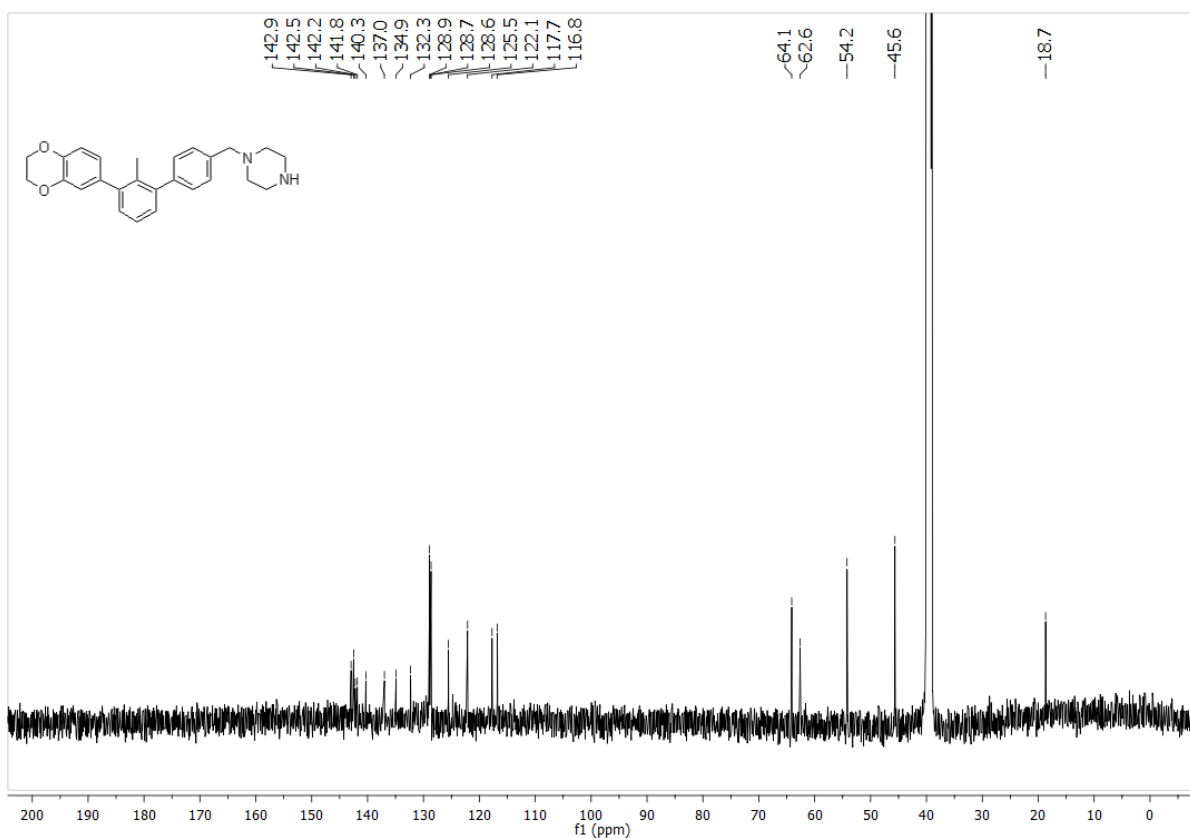

**6c. 1-((3'-(benzo-1,4-dioxan-6-yl)-2'-methyl-[1,1'-biphenyl]-3-yl)methyl)piperazine**

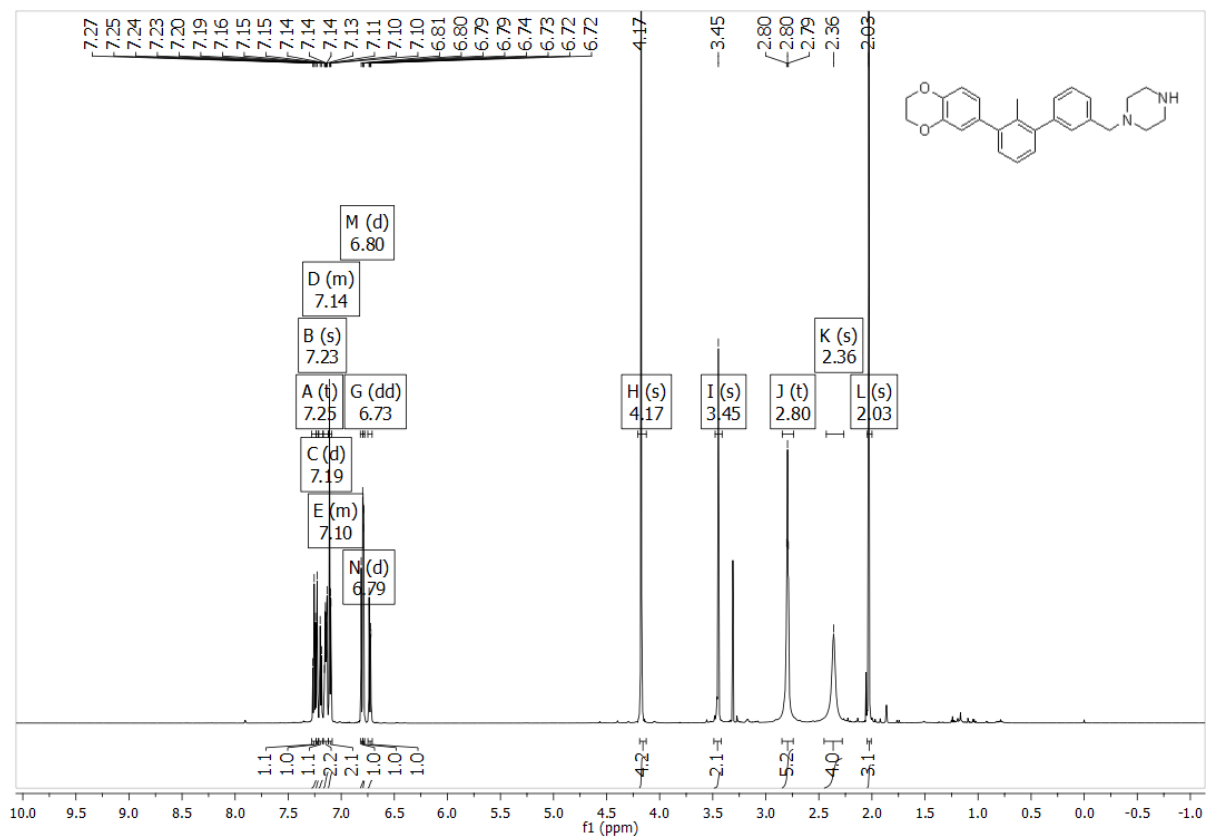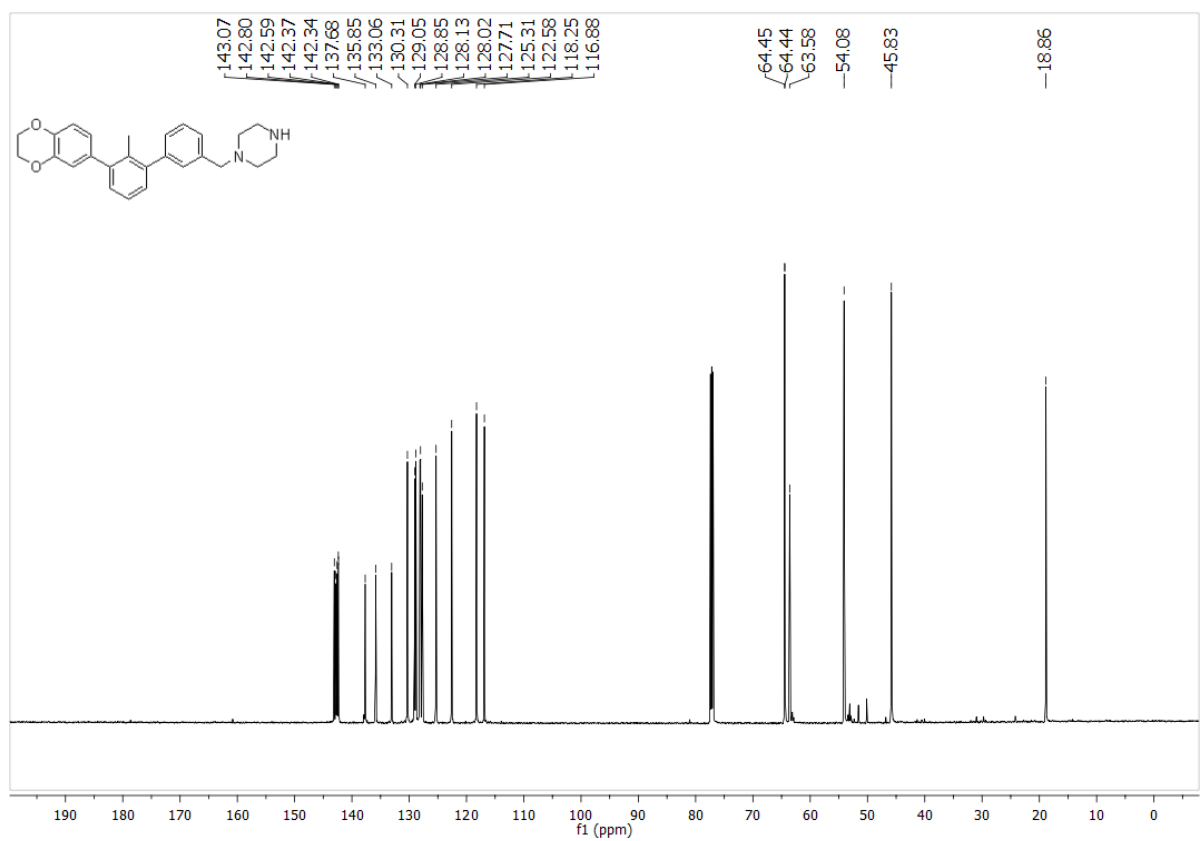

**6d. 1-((3'-(benzo-1,4-dioxan-6-yl)-3-methoxy-2'-methyl-[1,1'-biphenyl]-4-yl)methyl)piperazine**

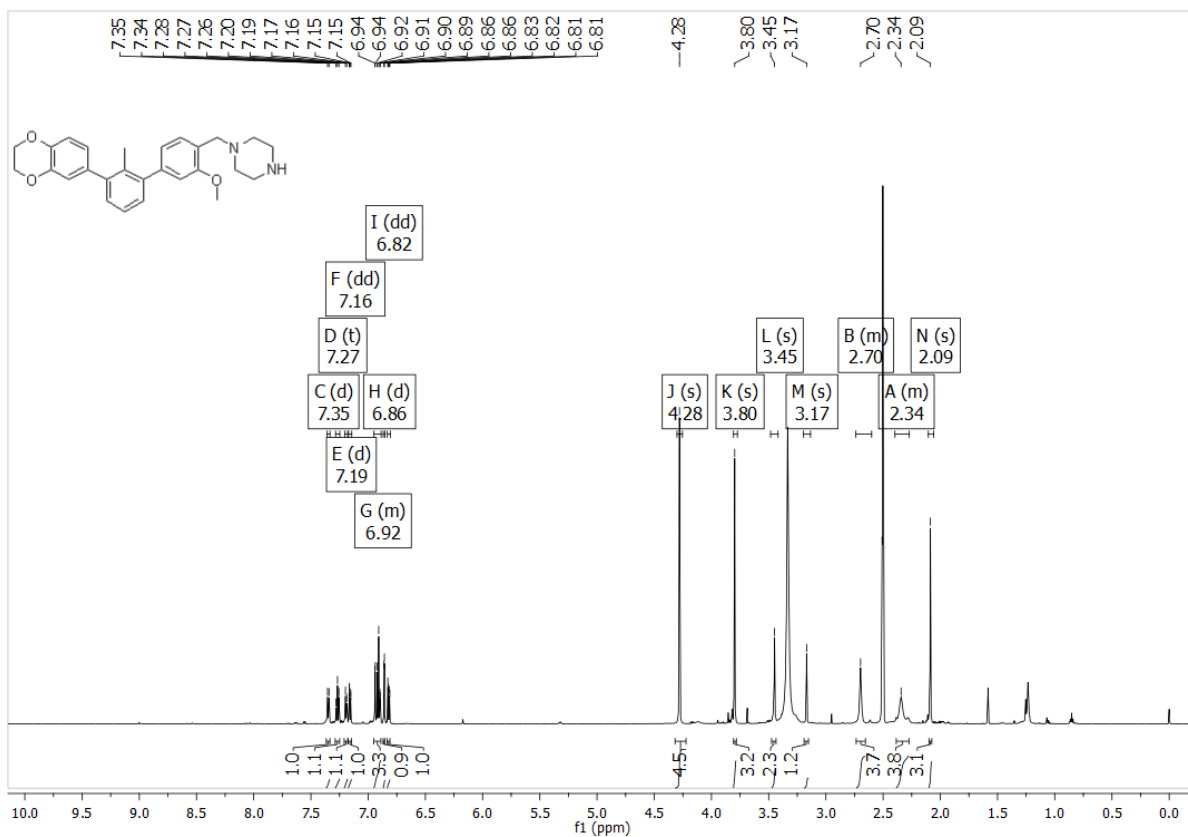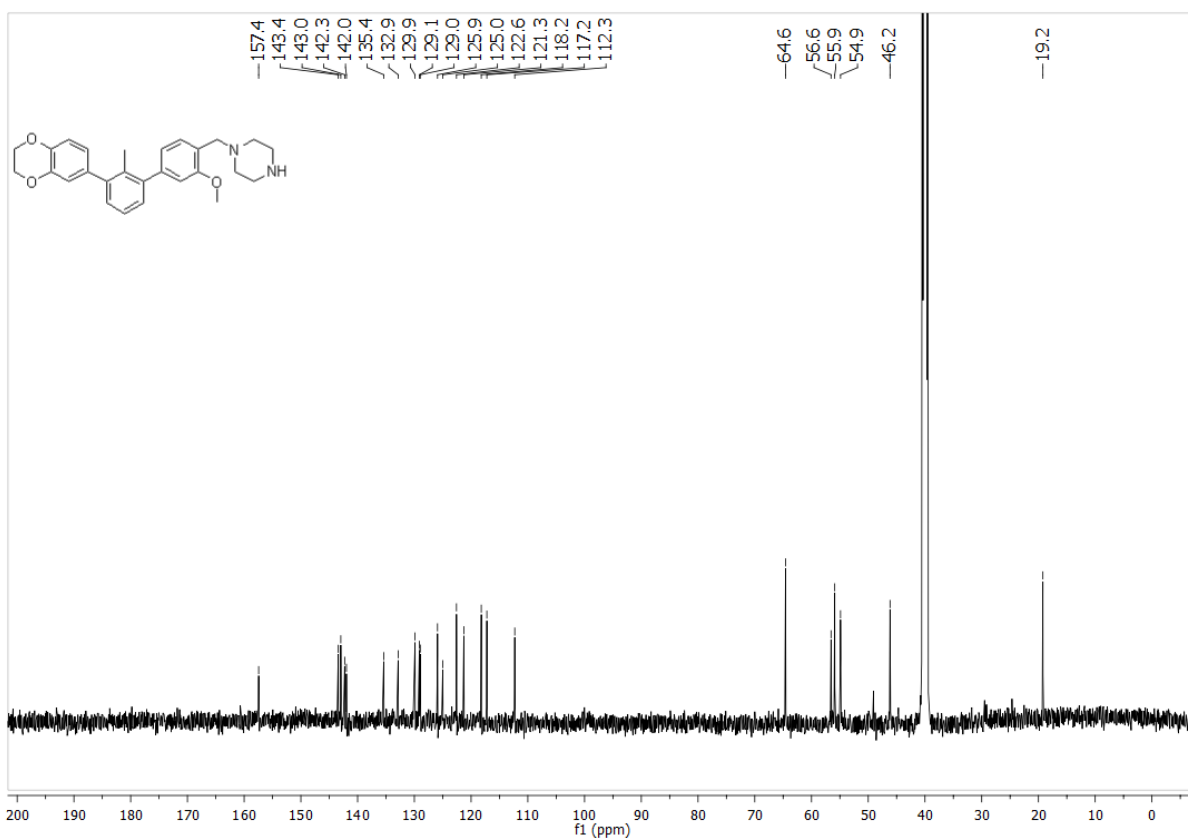

**6e. 3-(((3'-(2,3-benzo-1,4-dioxan-6-yl)-2'-methyl-4-(piperazin-1-ylmethyl)-[1,1'-biphenyl]-3-yl)oxy)methyl)benzonitrile**

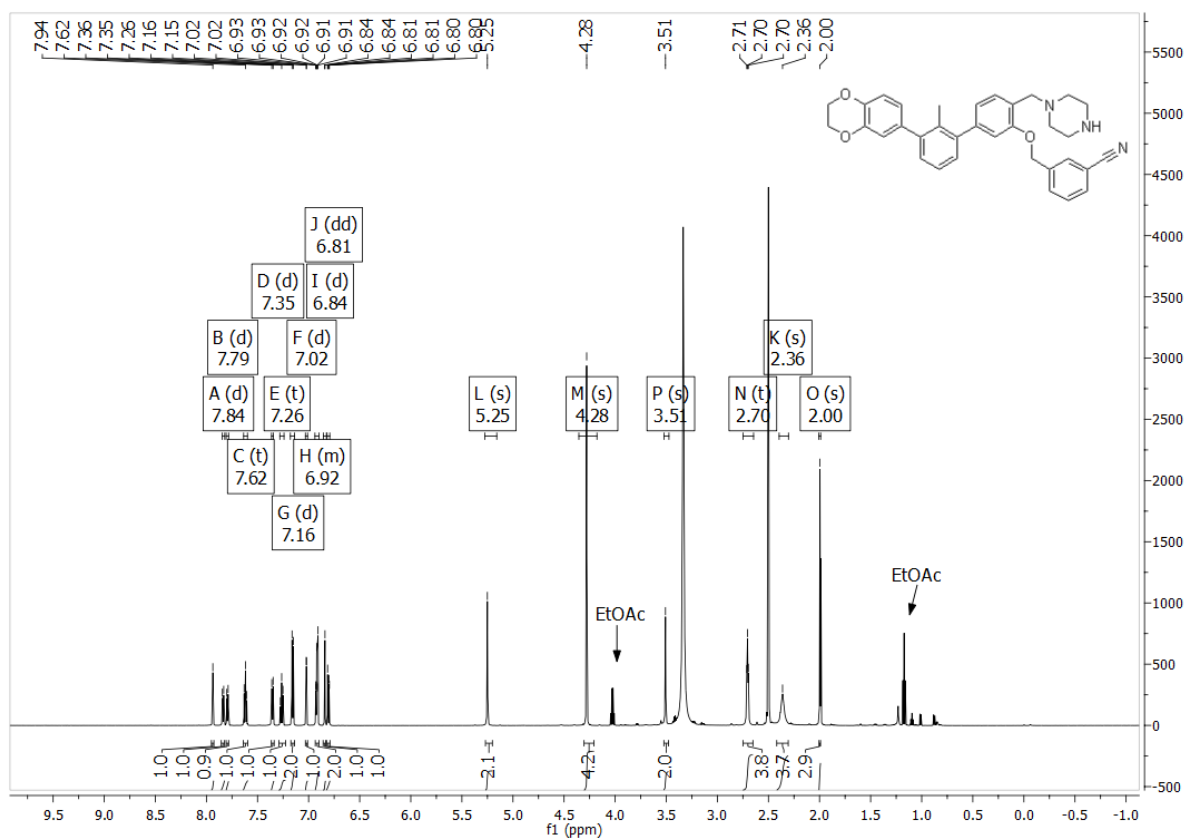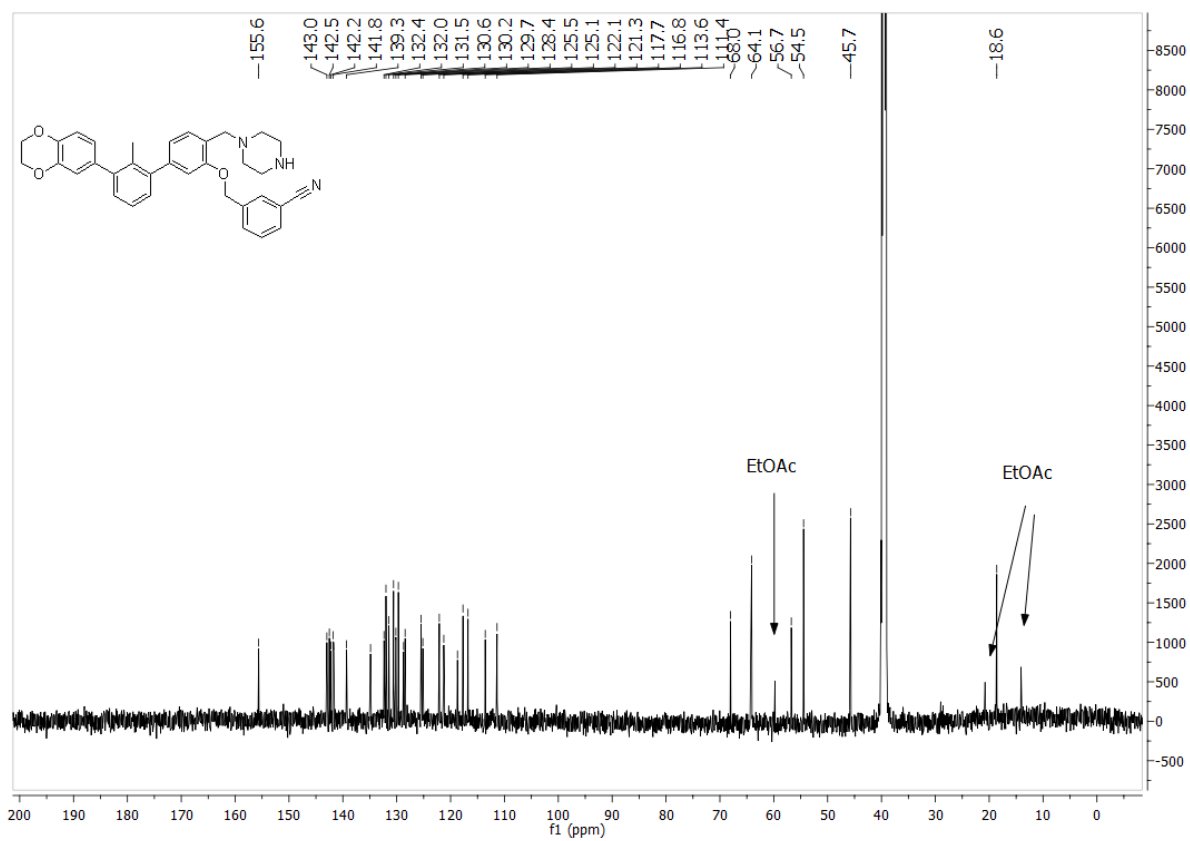

**7a. N-(2-(((2'-chloro-3'-(benzo-1,4-dioxan-6-yl)-3-methoxy-[1,1'-biphenyl]-4-yl)methyl)amino)ethyl)acetamide**

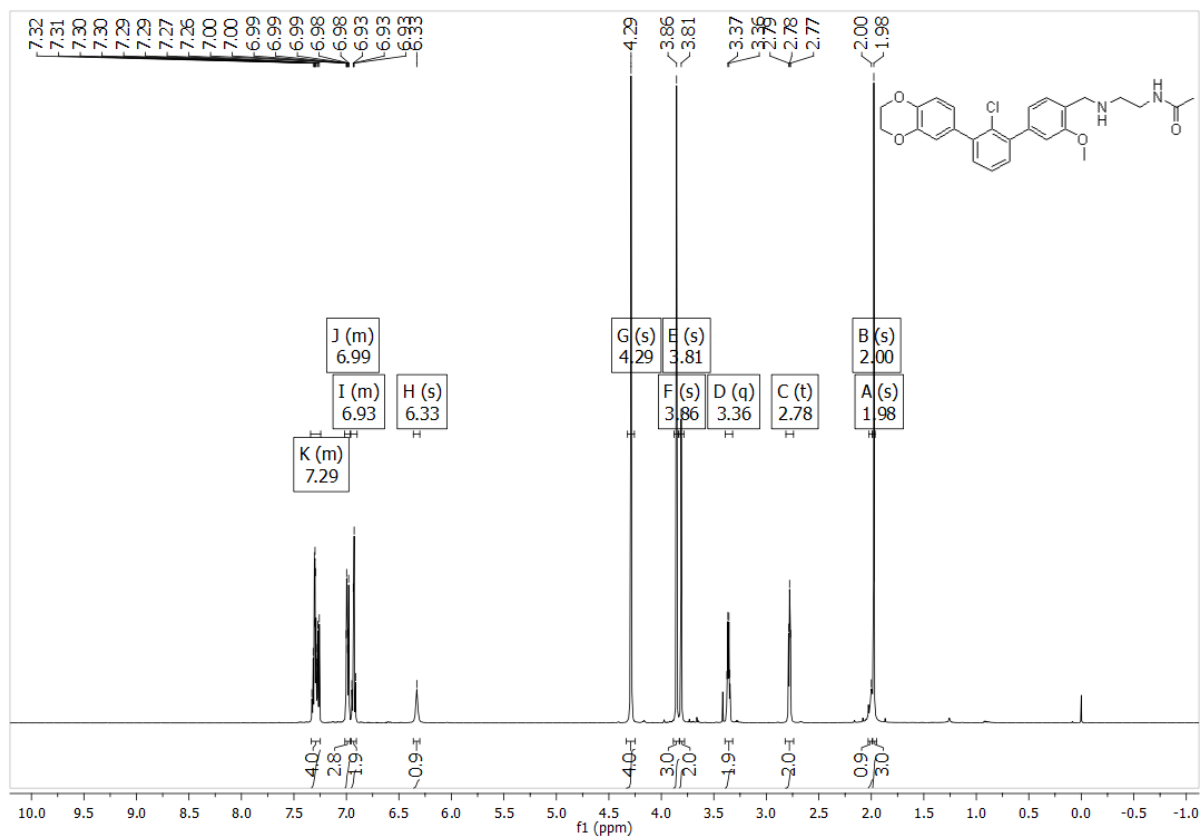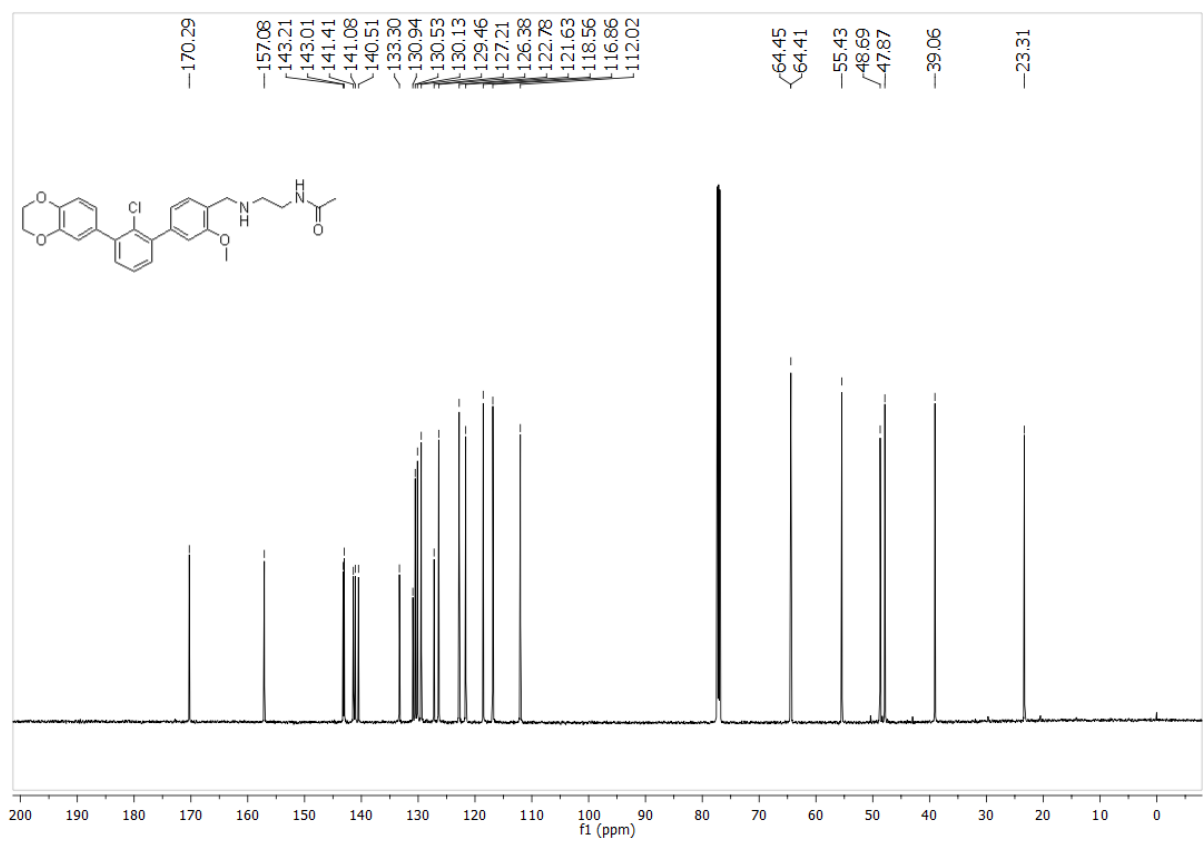

**7b. N-(2-(((benzo-1,4-dioxan-6-yl)-2'-chloro-3'-3-ethoxy-[1,1'-biphenyl]-4-yl)methyl)amino)ethyl)acetamide**

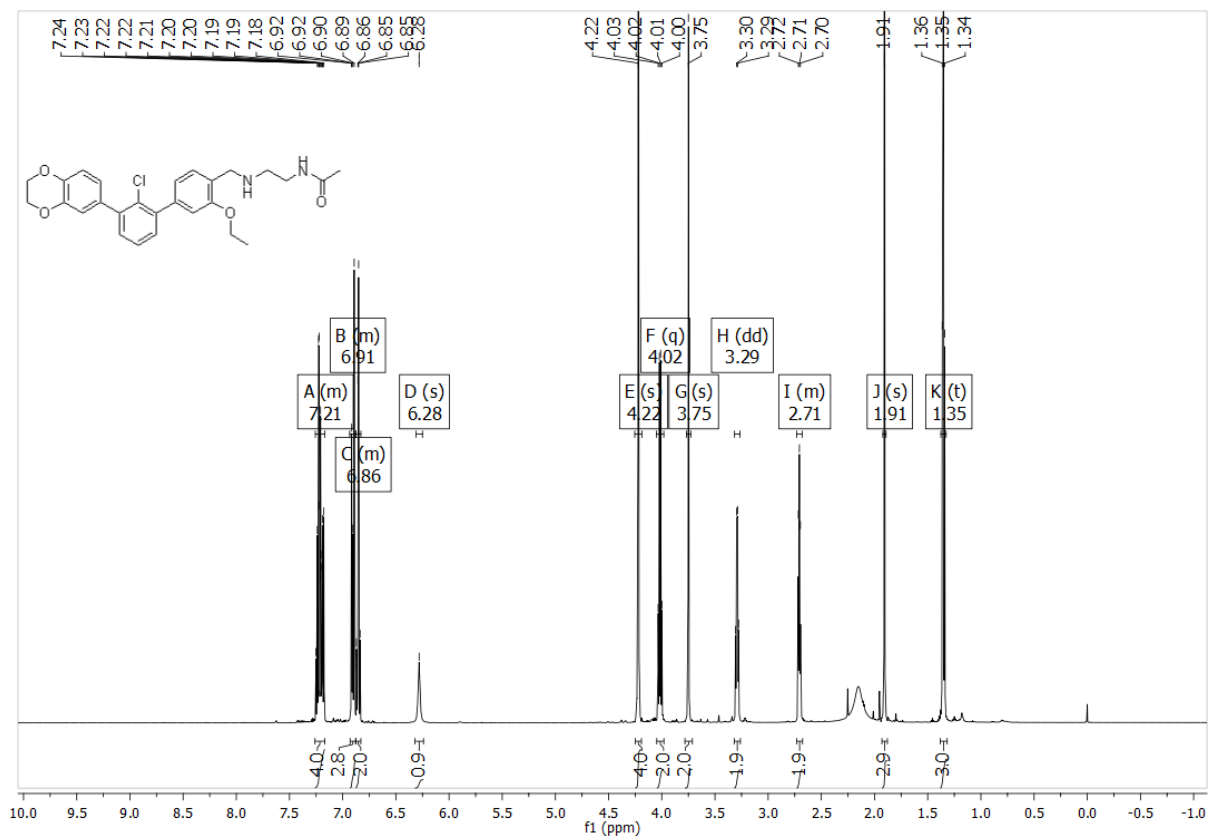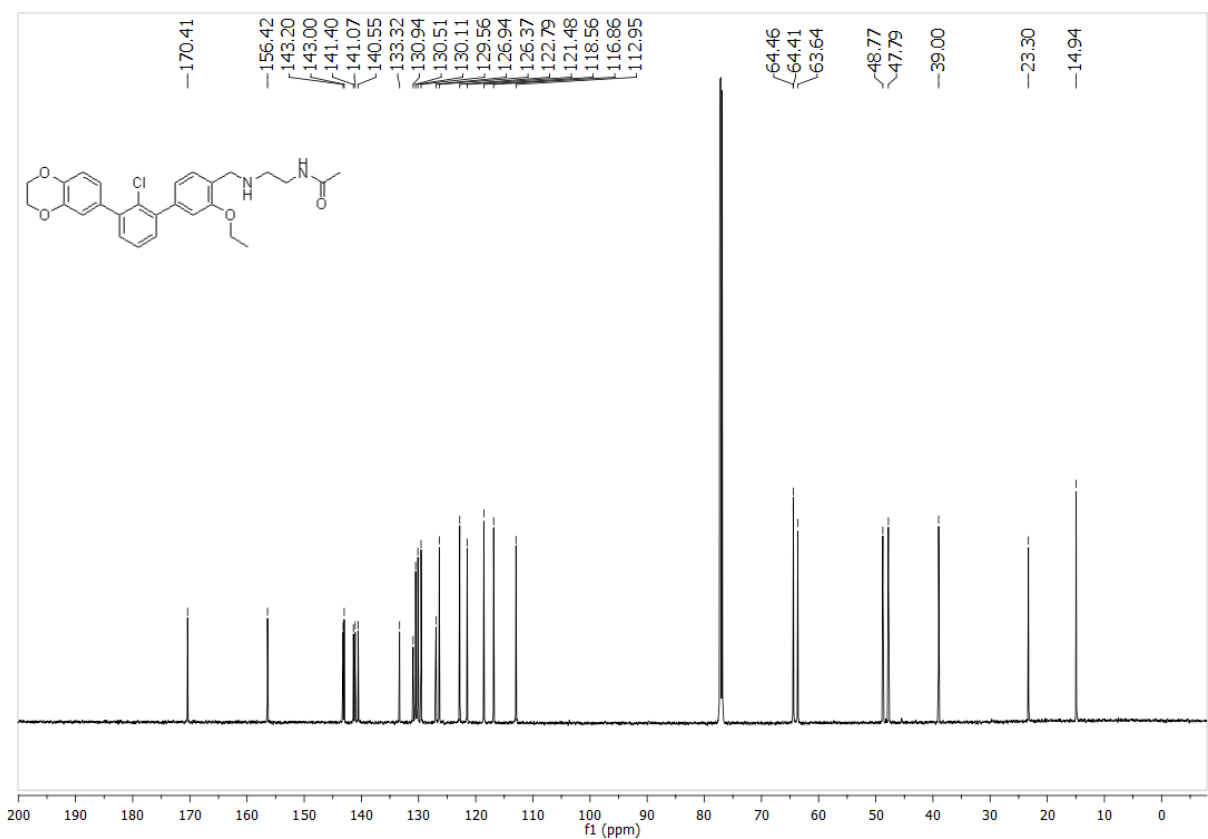

**7c. N-2-(((2'-chloro-3-((3'-cyano-[1,1'-biphenyl]-3-yl)isopropoxy)-3'-(benzo-1,4-dioxan-6-yl)-[1,1'-biphenyl]-4-yl)methyl)amino)ethyl)acetamide**

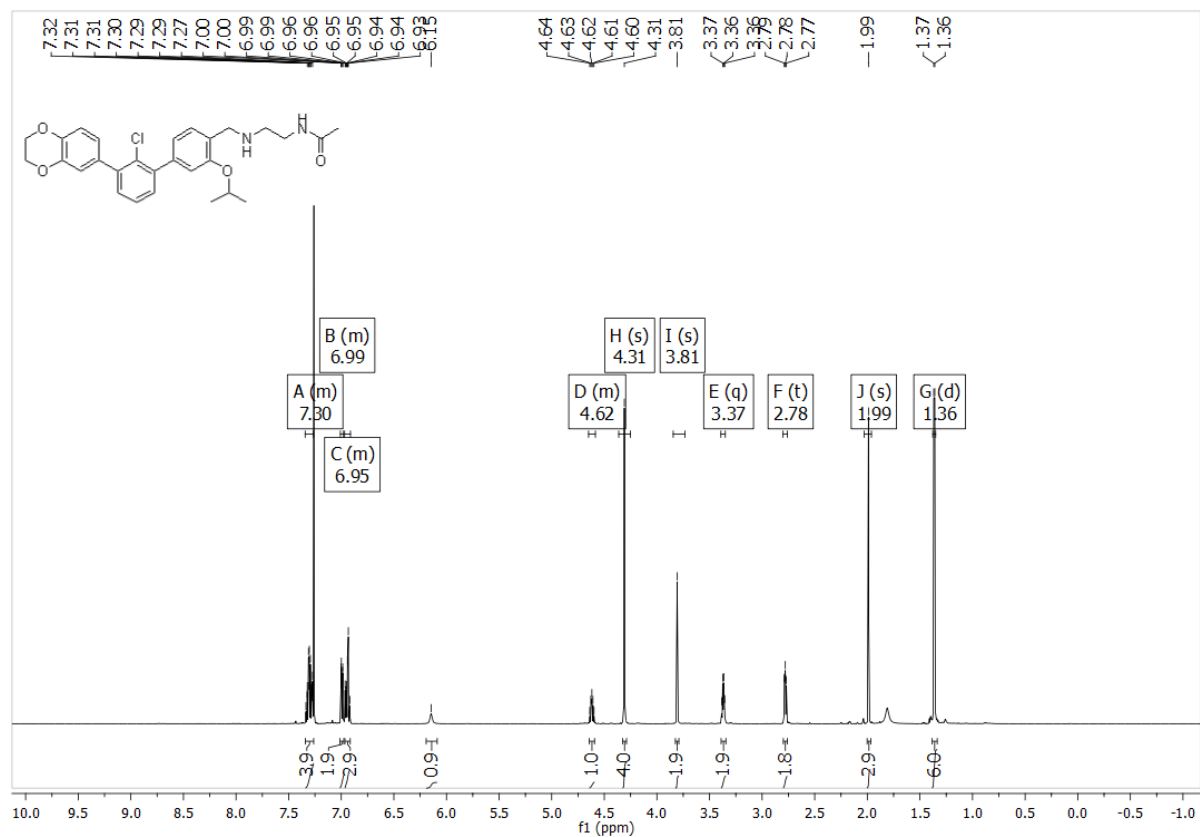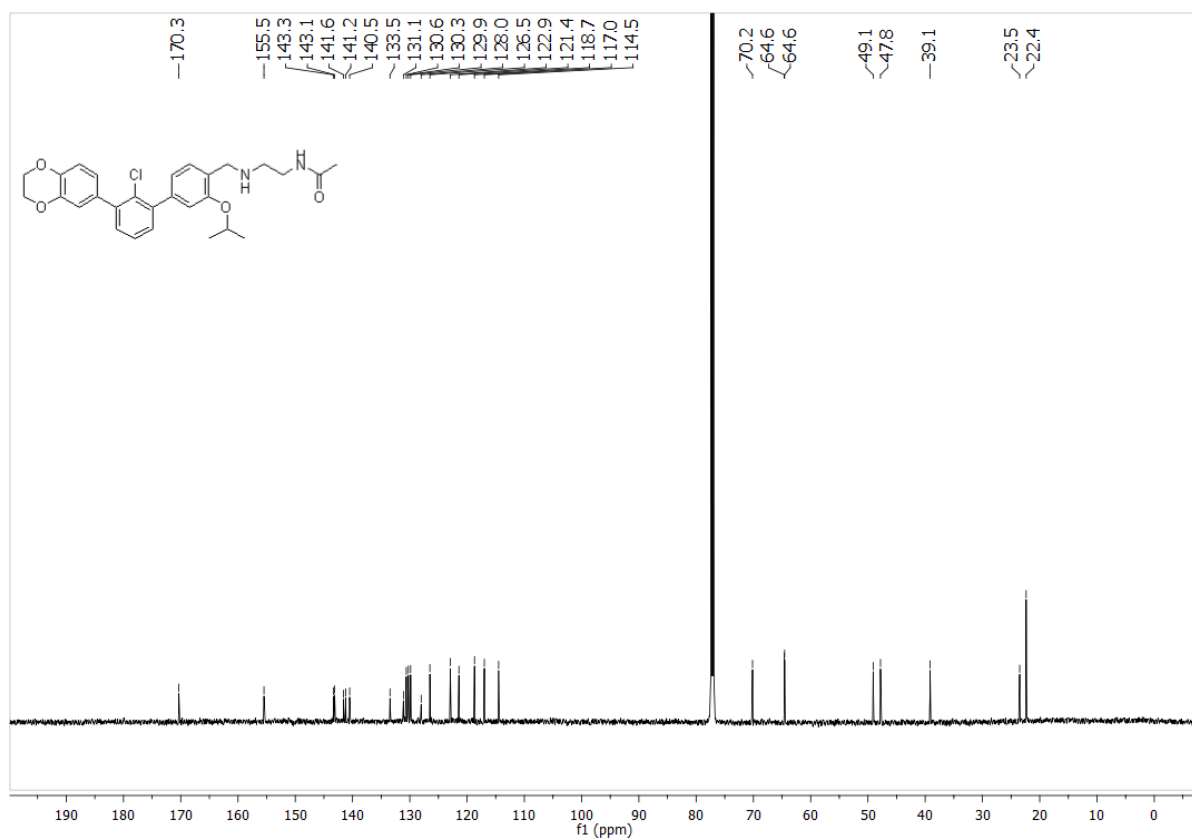



**7d. N-(2-(((2'-chloro-3-((3'-cyano-[1,1'-biphenyl]-3-yl)isopentyloxy)-3'-(benzo-1,4-dioxan-6-yl)-[1,1'-biphenyl]-4-yl)methyl)amino)ethyl)acetamide**

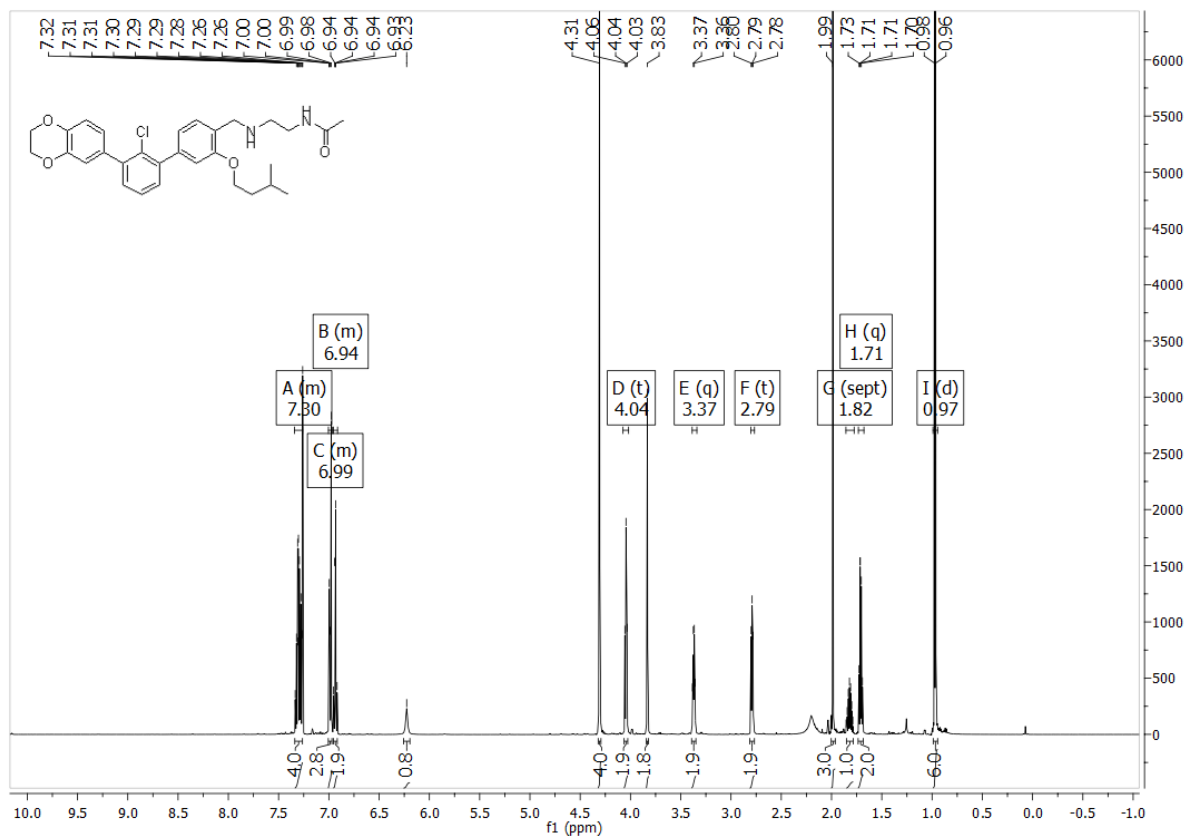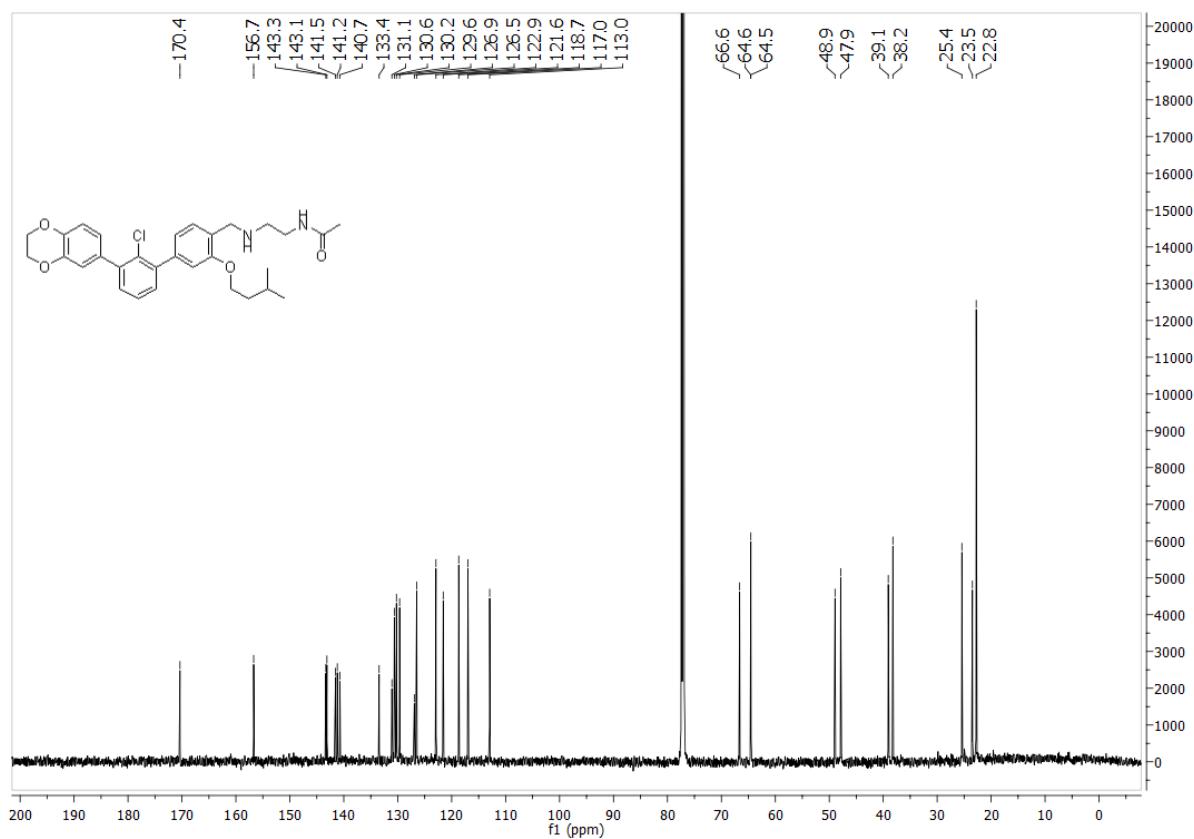

**7e. N-(2-(((3'-(benzo-1,4-dioxan-6-yl)-2'-chloro-3-(cyanomethoxy)-[1,1'-biphenyl]-4-yl)methyl)amino)ethyl)acetamide**

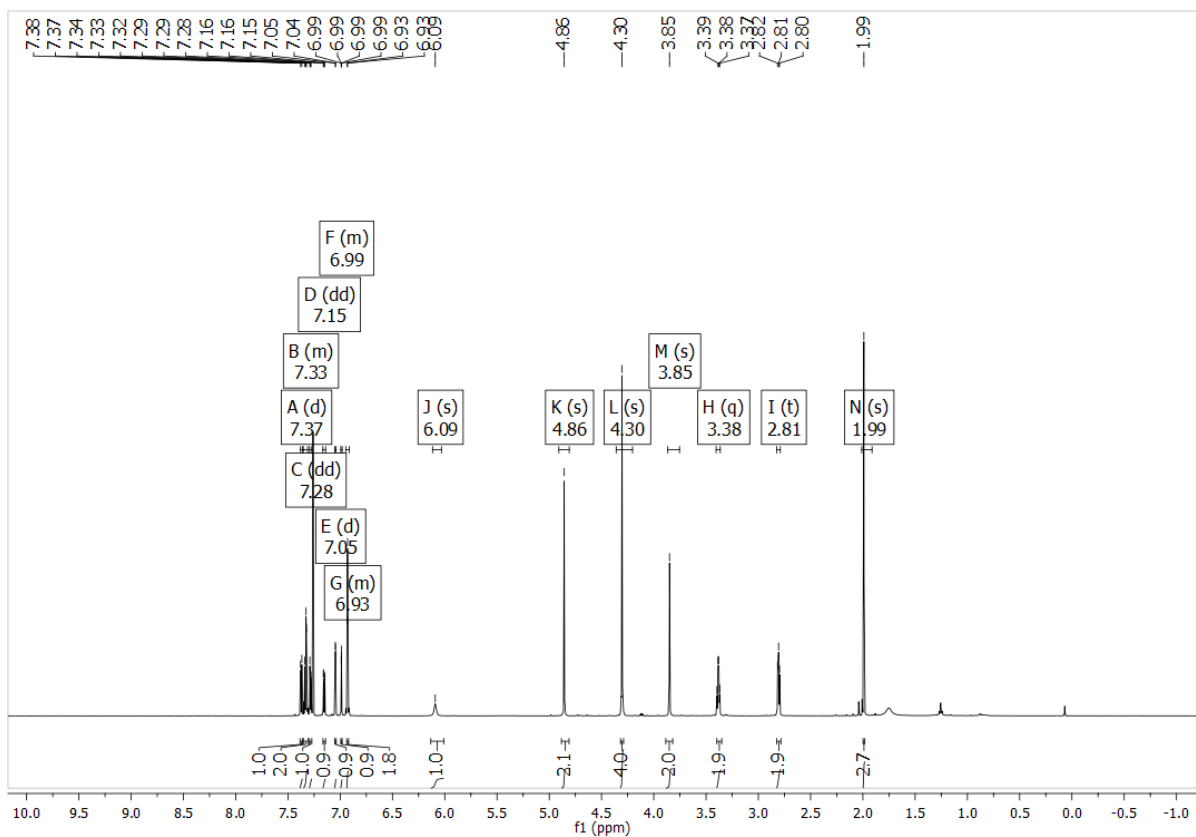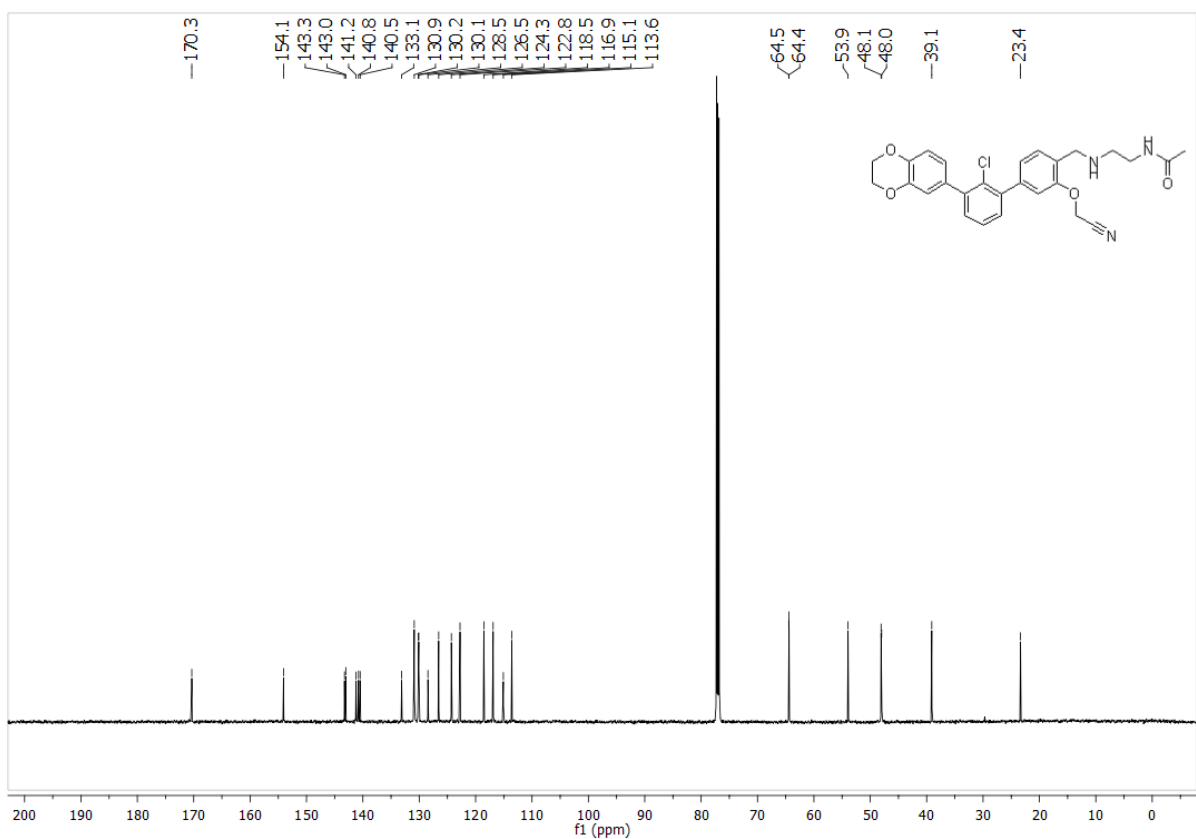

**7f. N-(2-(((3'-(benzo-1,4-dioxan-6-yl)-2'-chloro-3-(cyclobutylmethoxy)-[1,1'-biphenyl]-4-yl)methyl)amino)ethyl)acetamide**

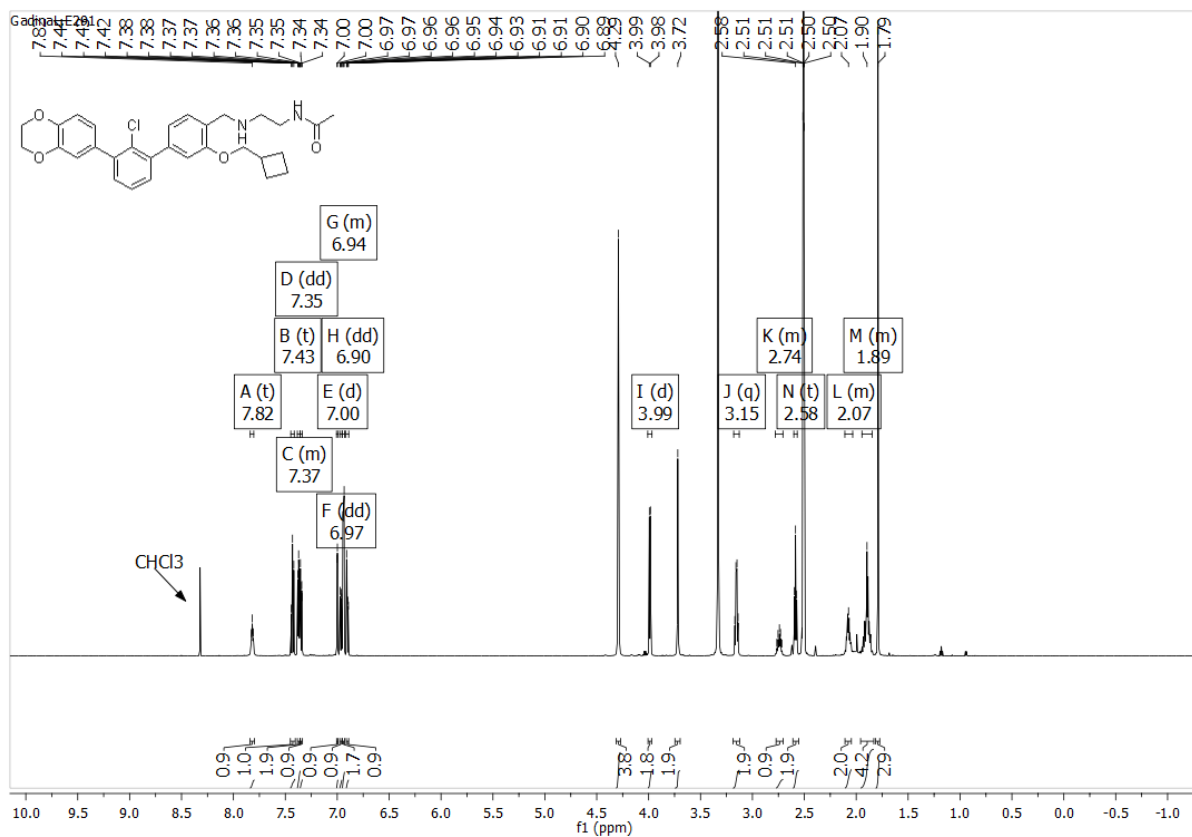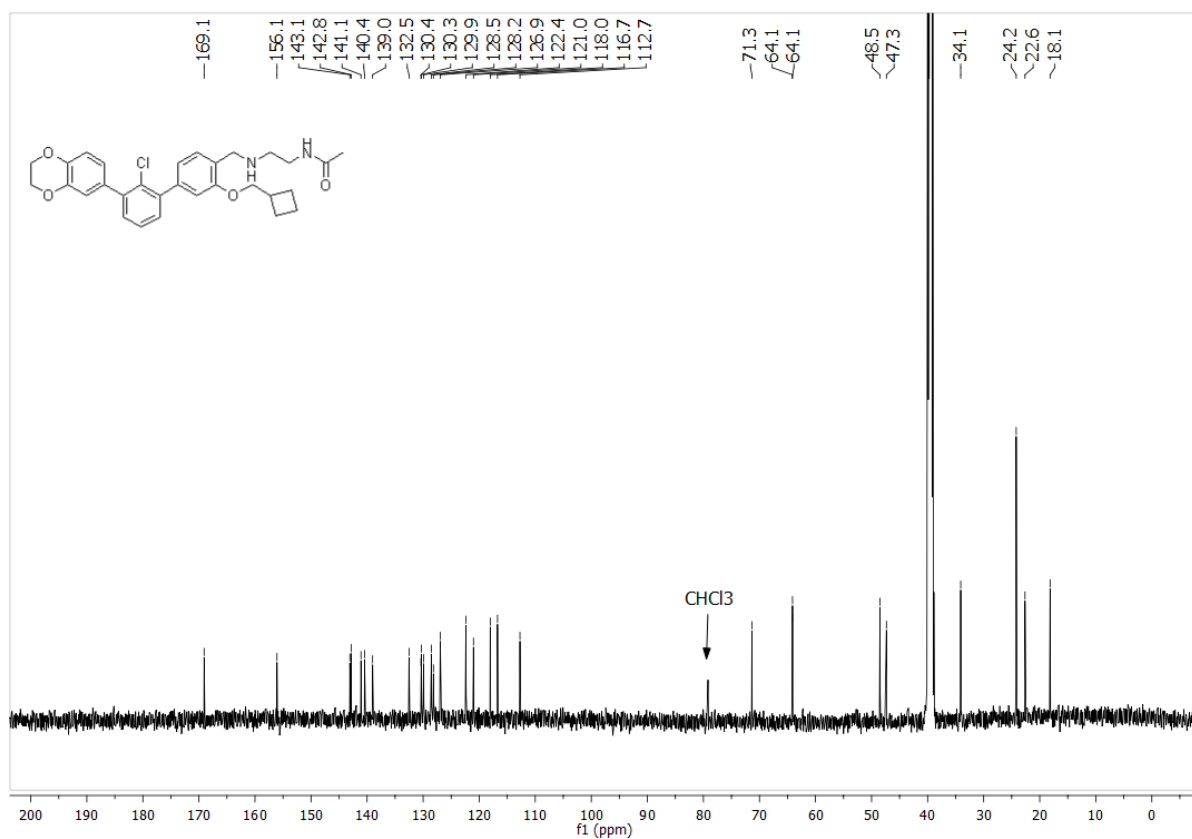

**7g. N-(2-(((3'-(benzo-1,4-dioxan-6-yl)-2'-chloro-3-(cyclopentylmethoxy)-[1,1'-biphenyl]-4-yl)methyl)amino)ethyl)acetamide**

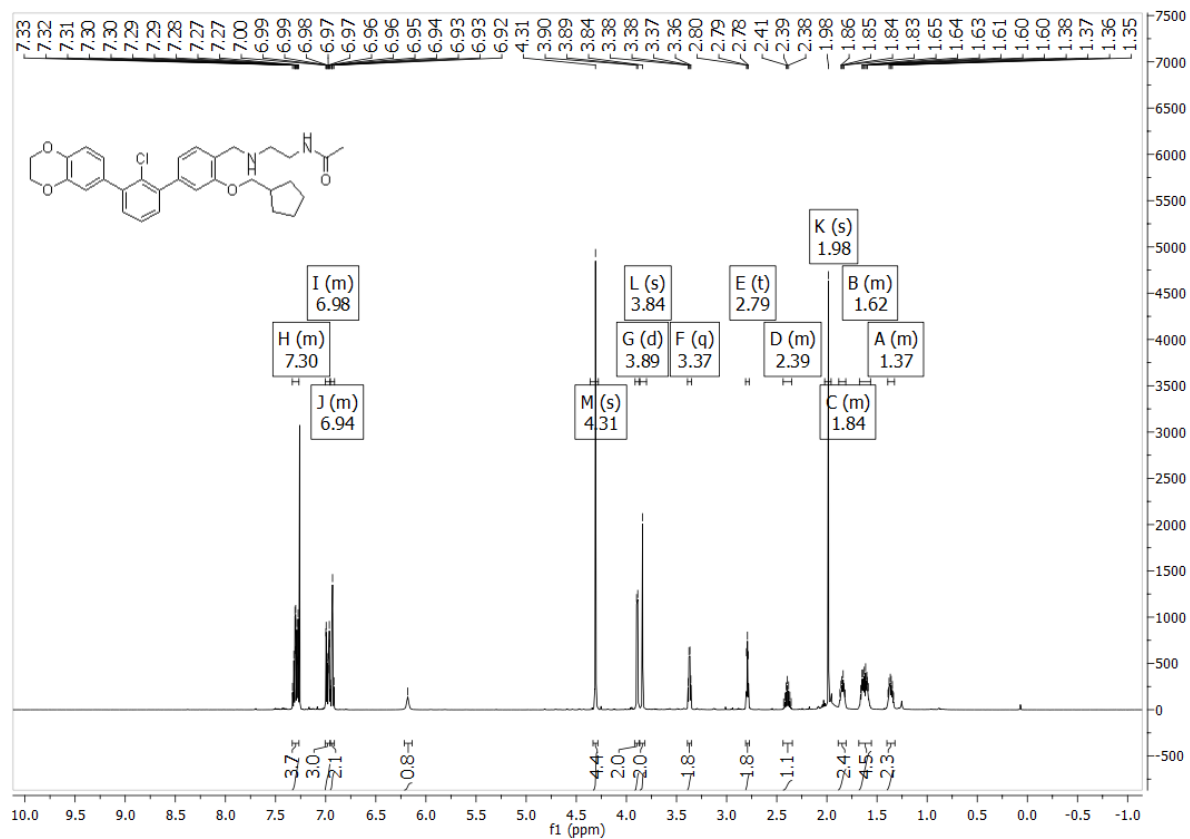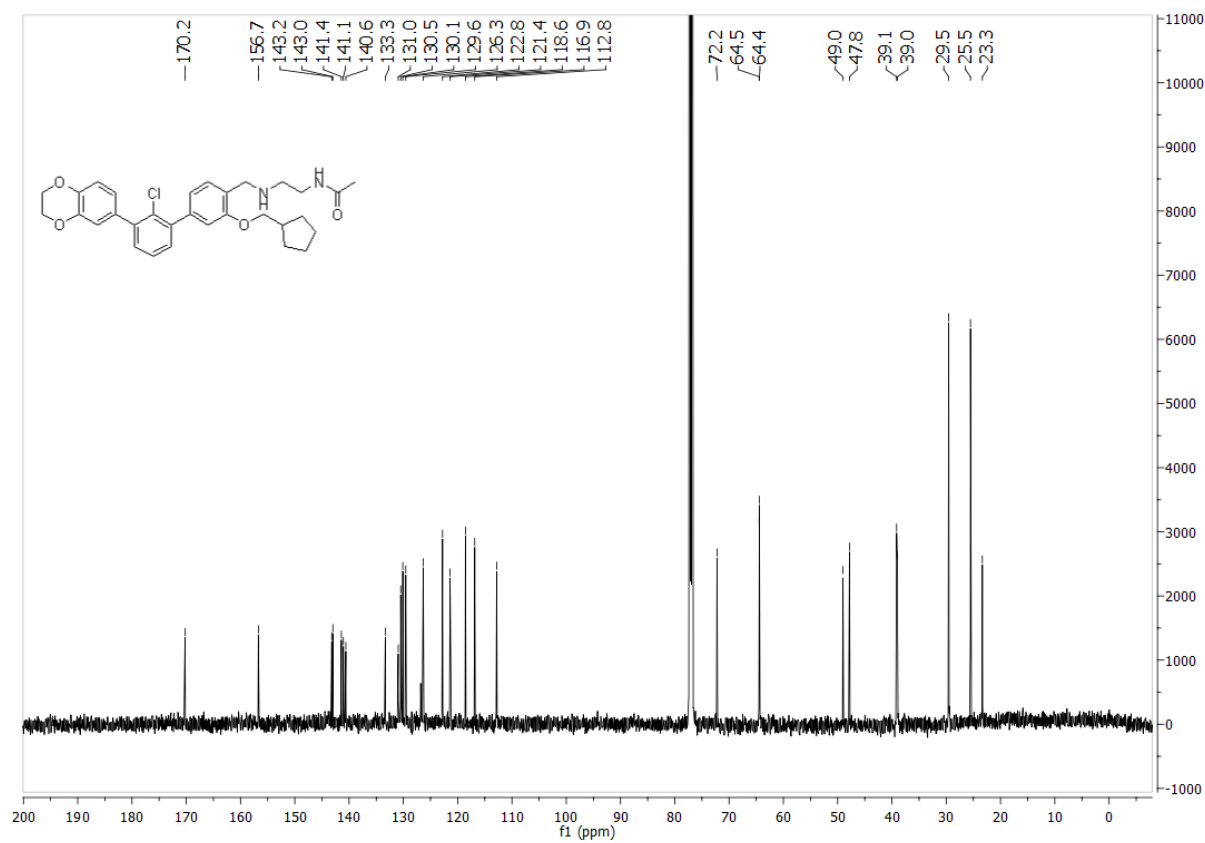

**7h. N-(2-(((3'-(benzo-1,4-dioxan-6-yl)-2'-chloro-3-((3'-cyano-[1,1'-biphenyl]-3-yl)methoxy)-[1,1'-biphenyl]-4-yl)methyl)amino)ethyl)acetamide**

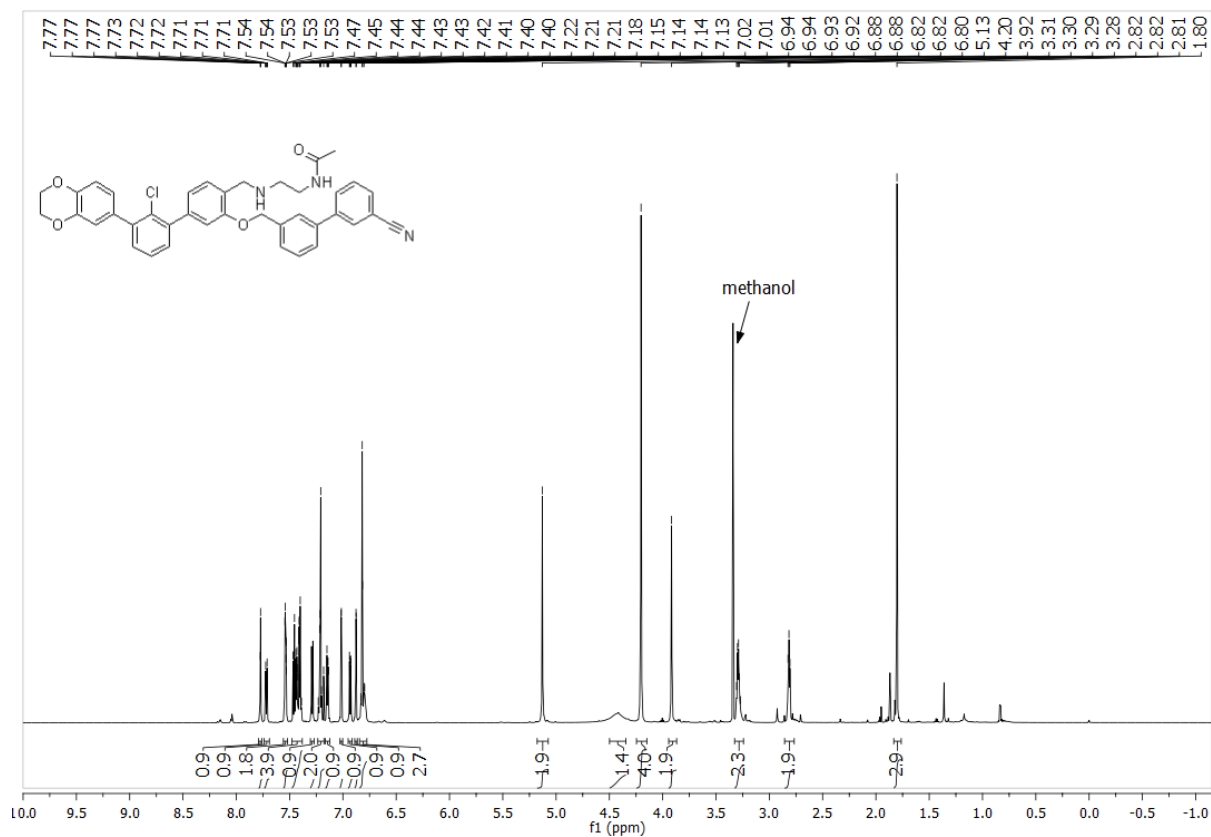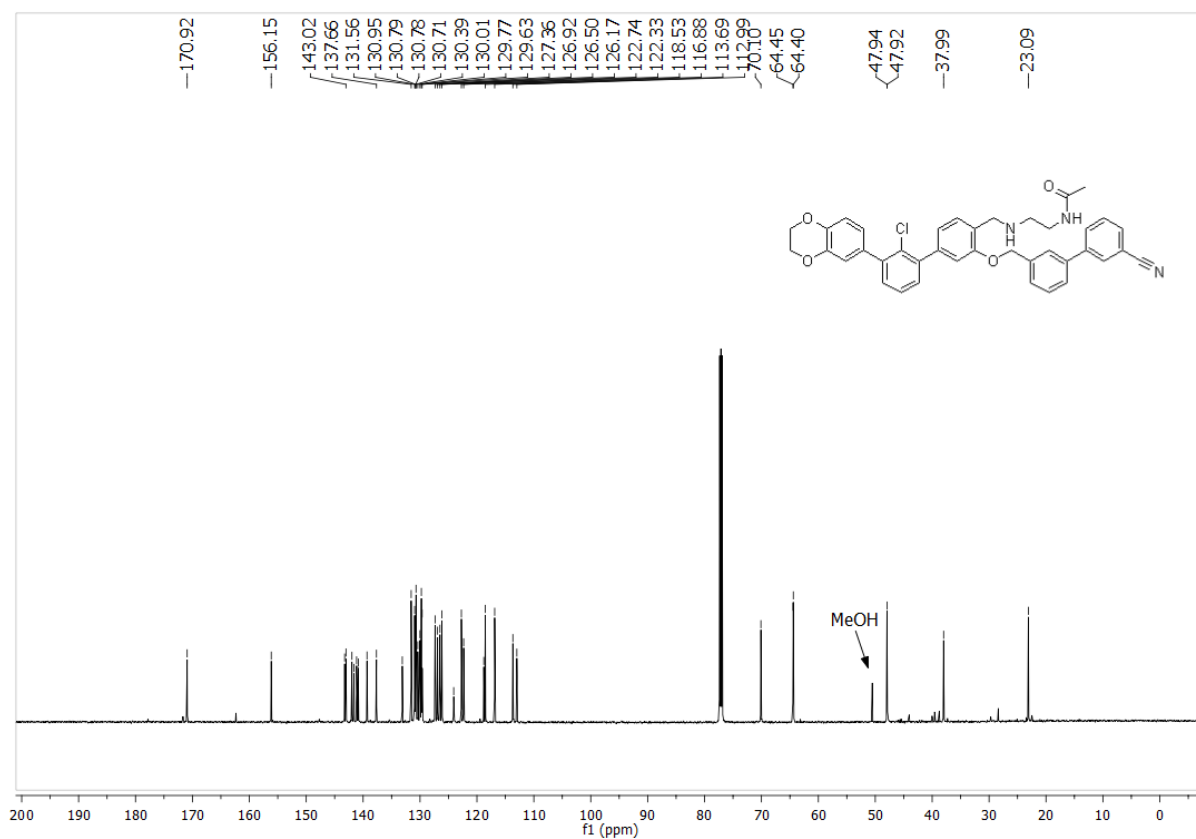

**8a. 1-((2'-chloro-3'-(benzo-1,4-dioxan-6-yl)-3-methoxy-[1,1'-biphenyl]-4-yl)methyl)piperazine**

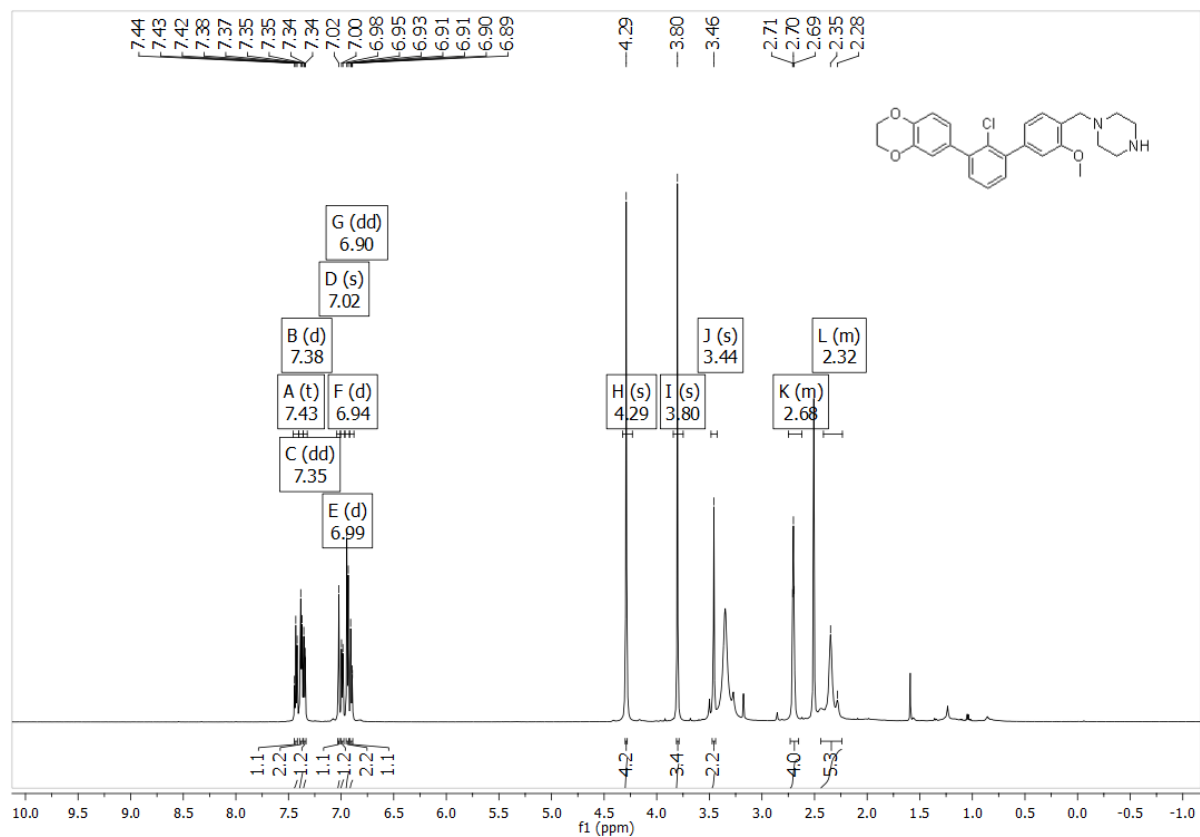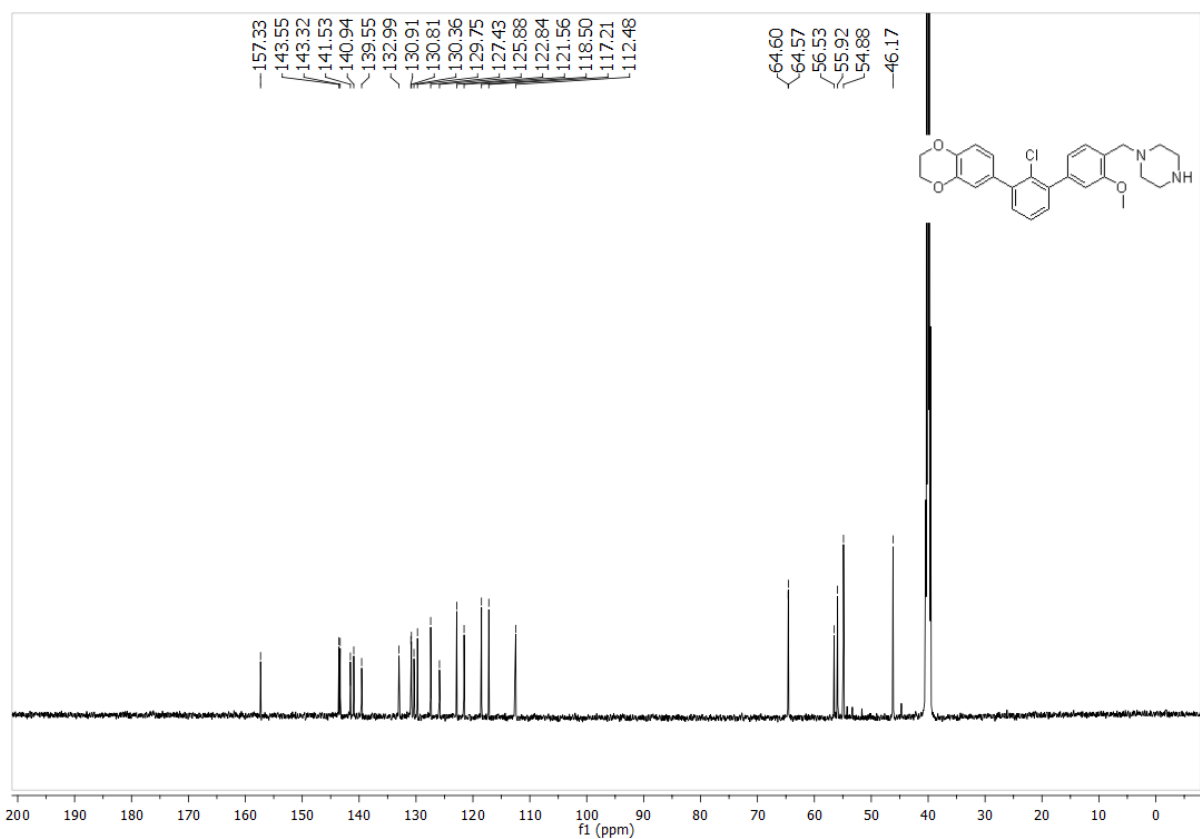

**8b. 4-((2'-chloro-3'-(benzo-1,4-dioxan-6-yl)-3-methoxy-[1,1'-biphenyl]-4-yl)methyl)piperazine-1-carboxamide**

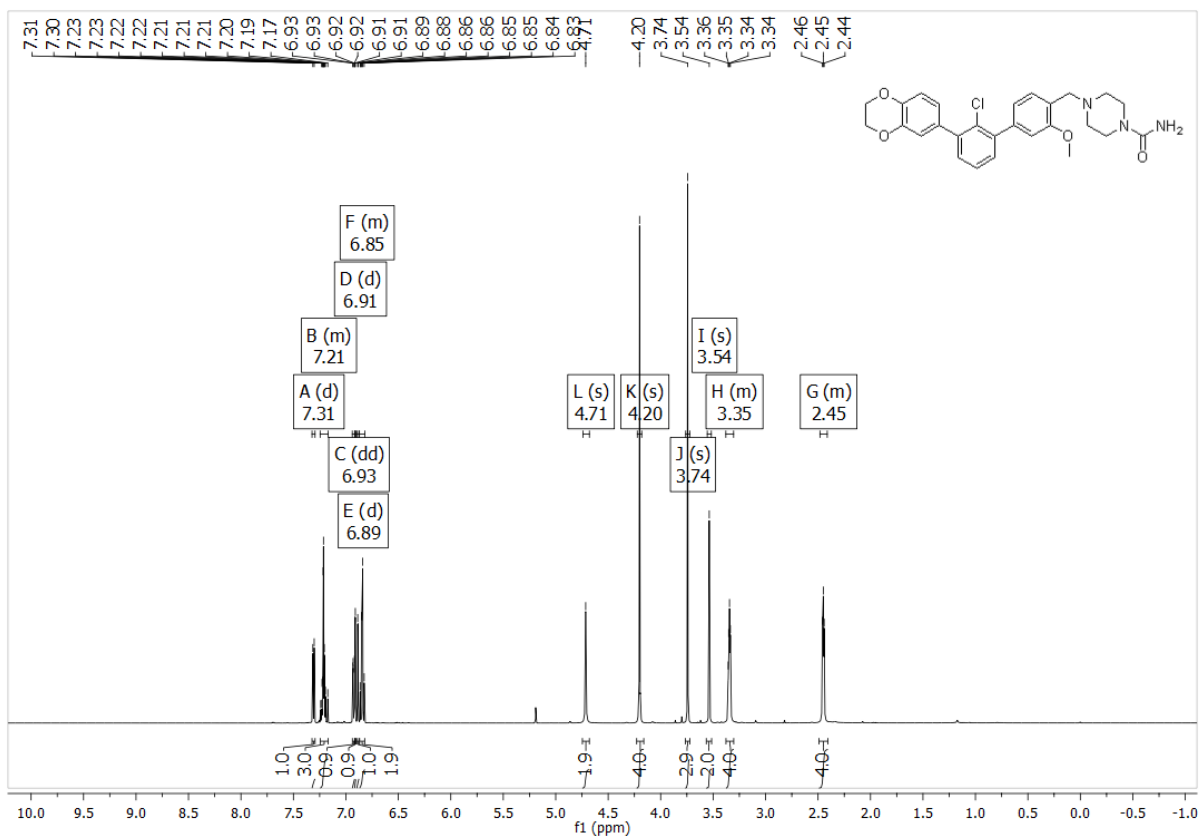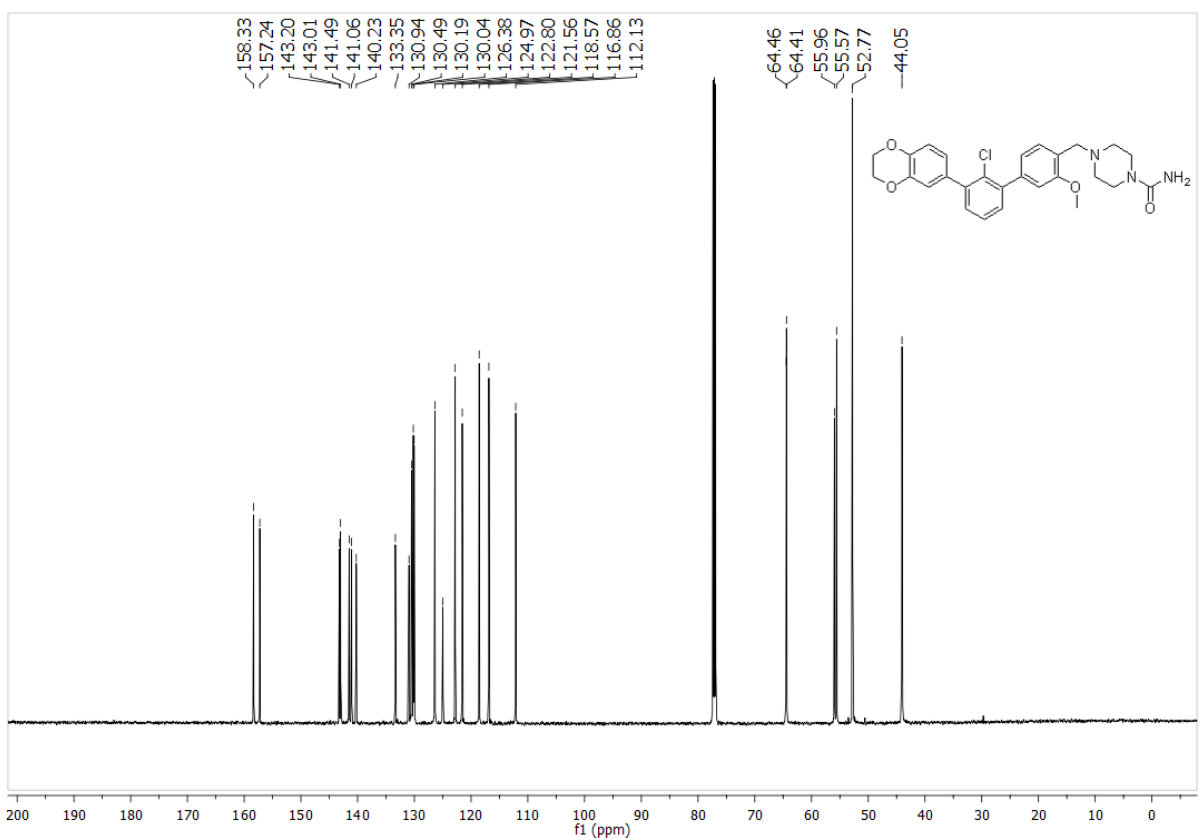

**8c. 1-(4-((2'-Chloro-3'-(benzo-1,4-dioxan-6-yl)-3-methoxy-[1,1'-biphenyl]-4-yl)methyl)piperazin-1-yl)ethan-1-one**

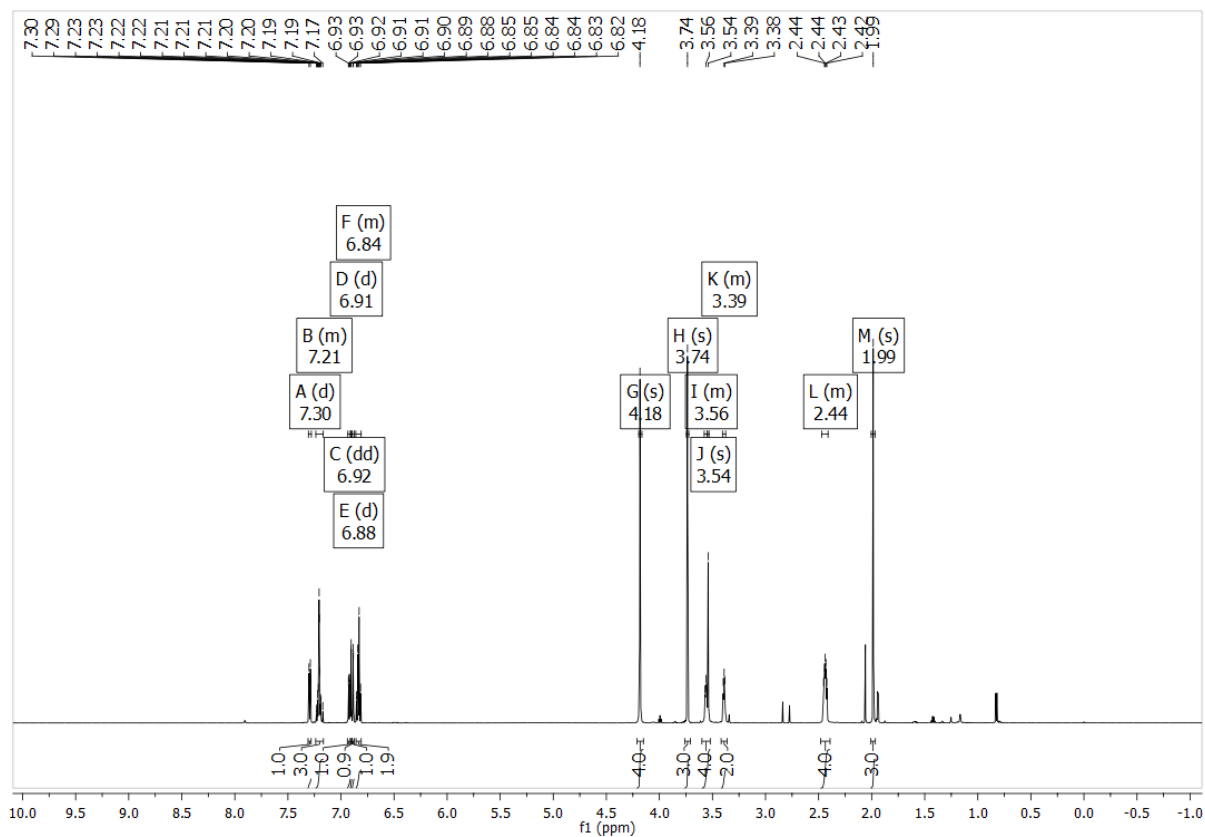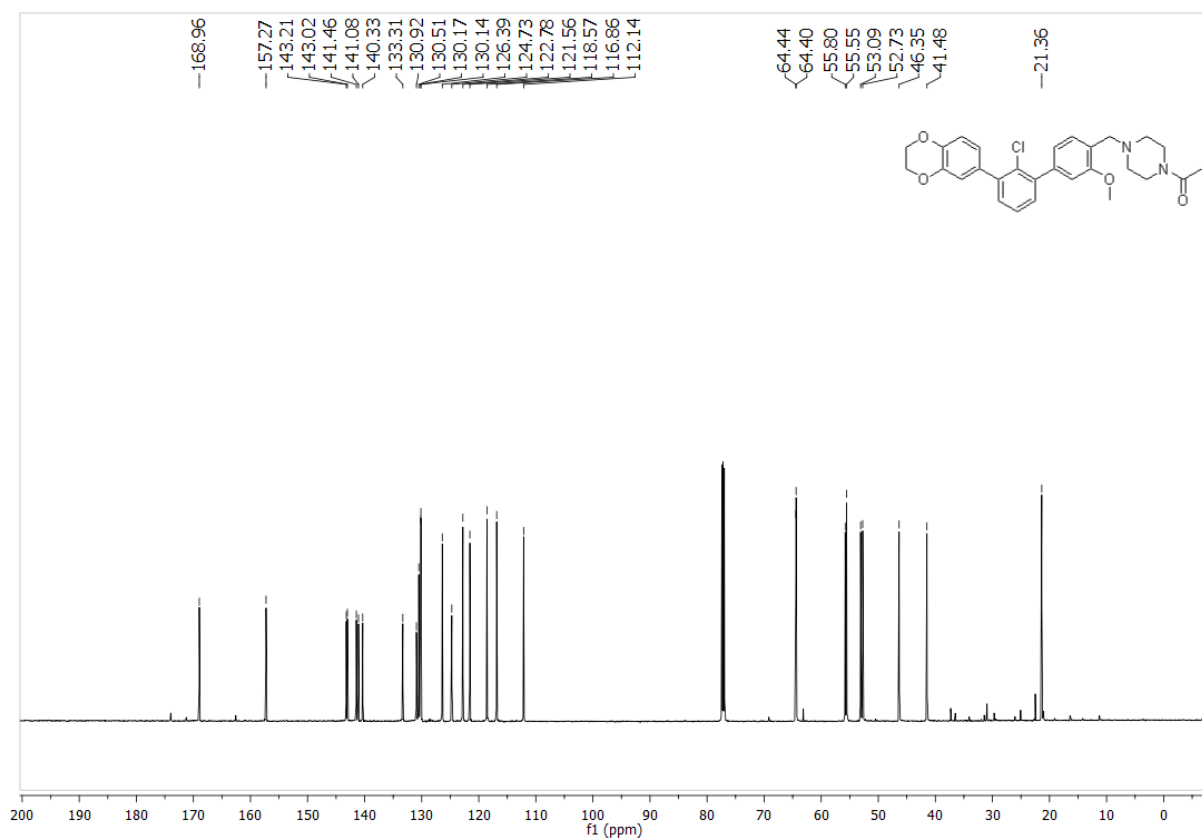



**8d. 2-amino-1-(4-((2'-chloro-3'-(benzo-1,4-dioxan-6-yl)-3-methoxy-[1,1'-biphenyl]-4-yl)methyl)piperazin-1-yl)ethan-1-one**

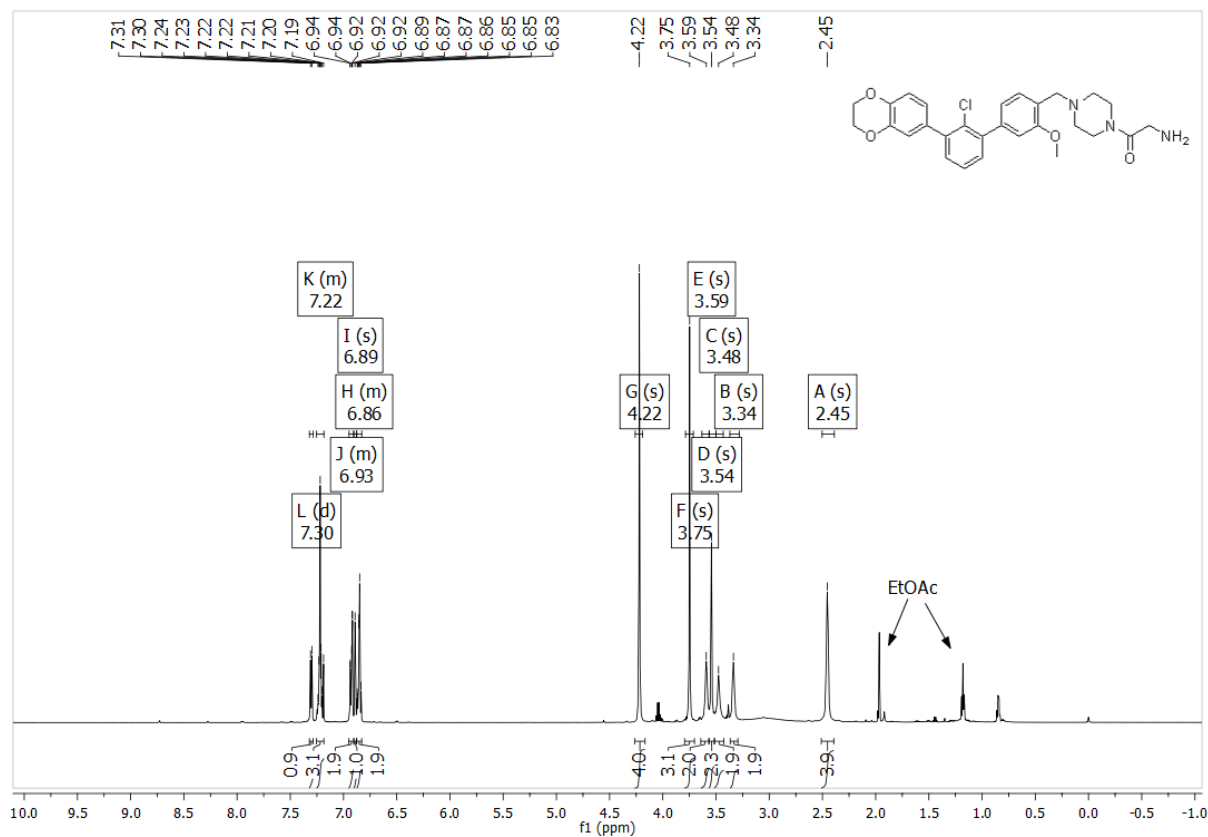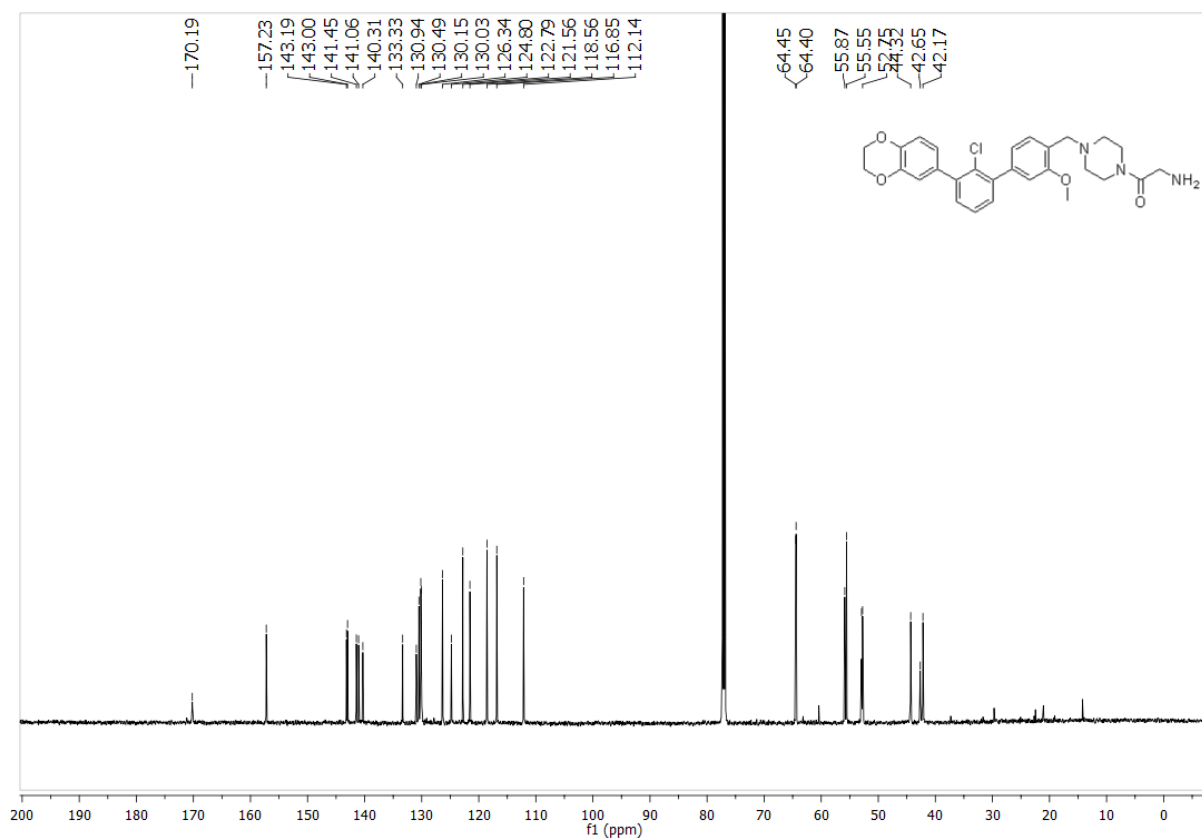

**8e. 1-((2'-chloro-3'-(benzo-1,4-dioxan-6-yl)-3-methoxy-[1,1'-biphenyl]-4-yl)methyl)-4-(methylsulfonyl)piperazine**

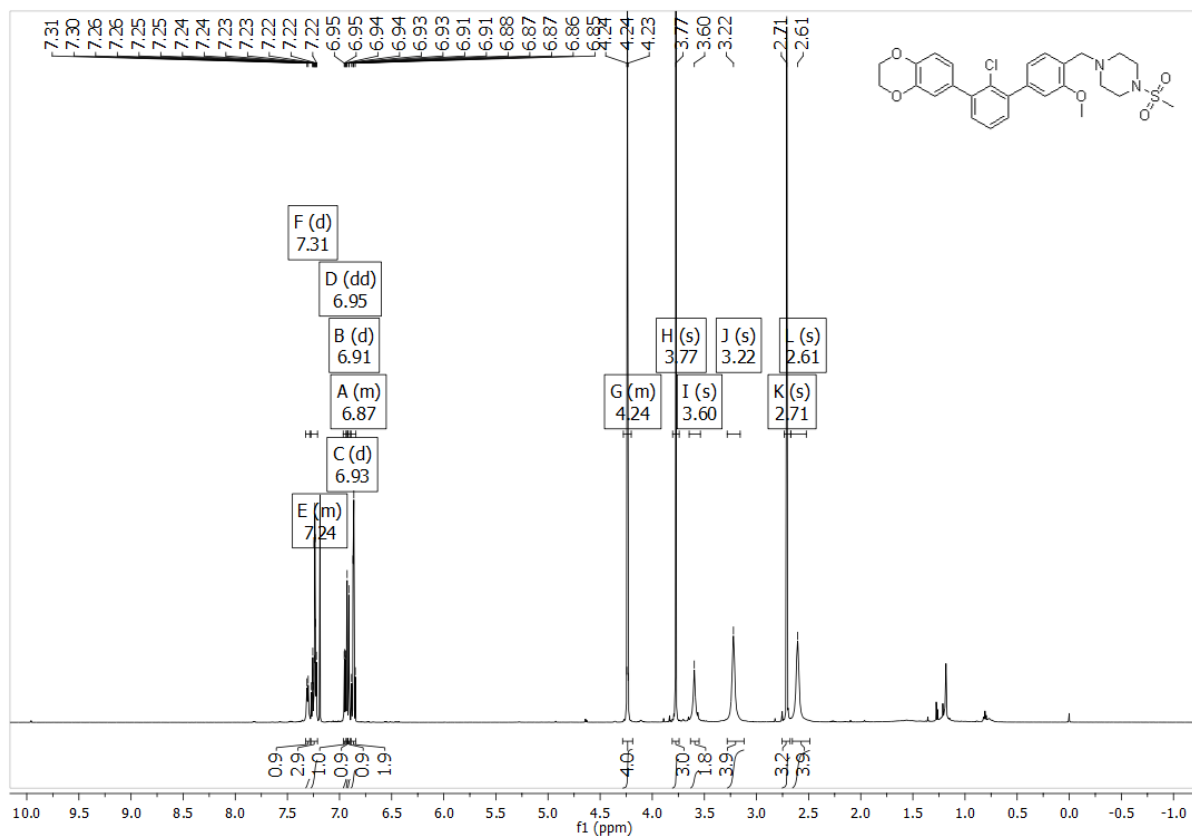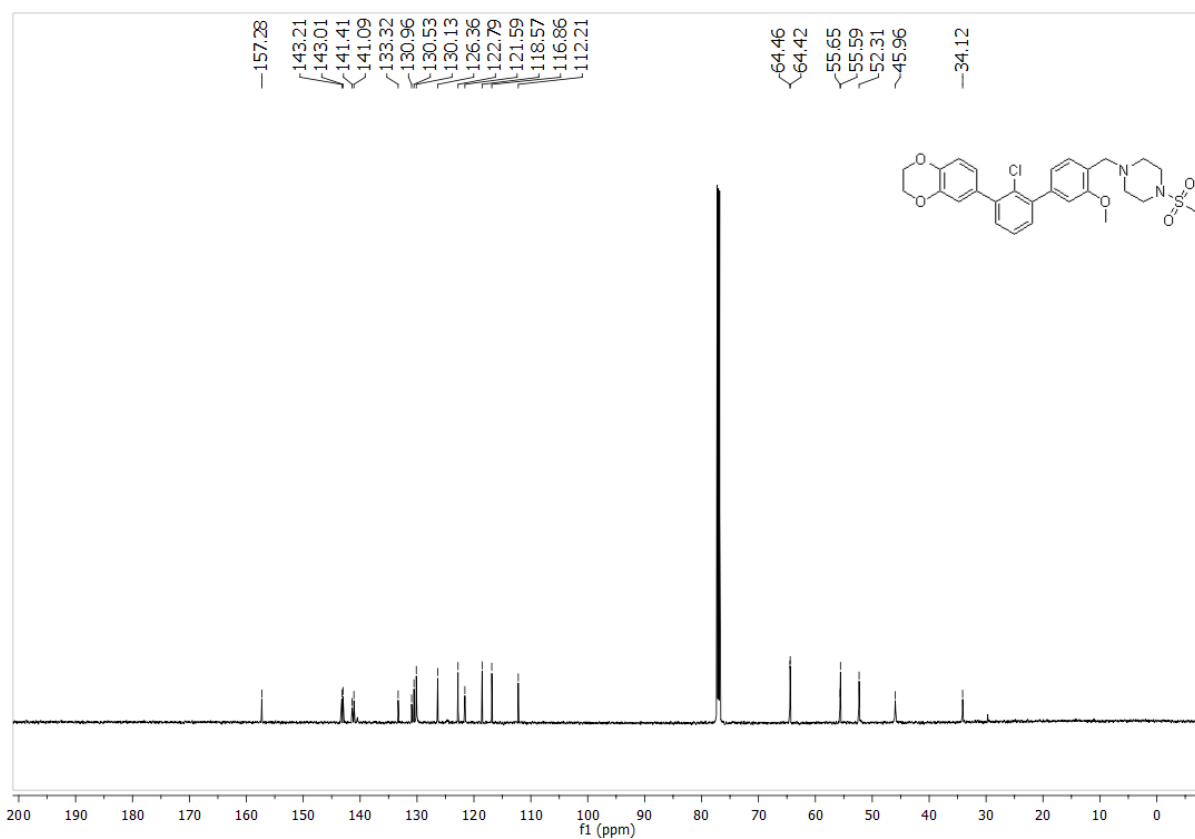

8f. 2-amino-N-(2-(((benzo-1,4-dioxan-6-yl)-3-methoxy-[1,1'-biphenyl]-4-yl)methyl)amino)ethyl)acetamide

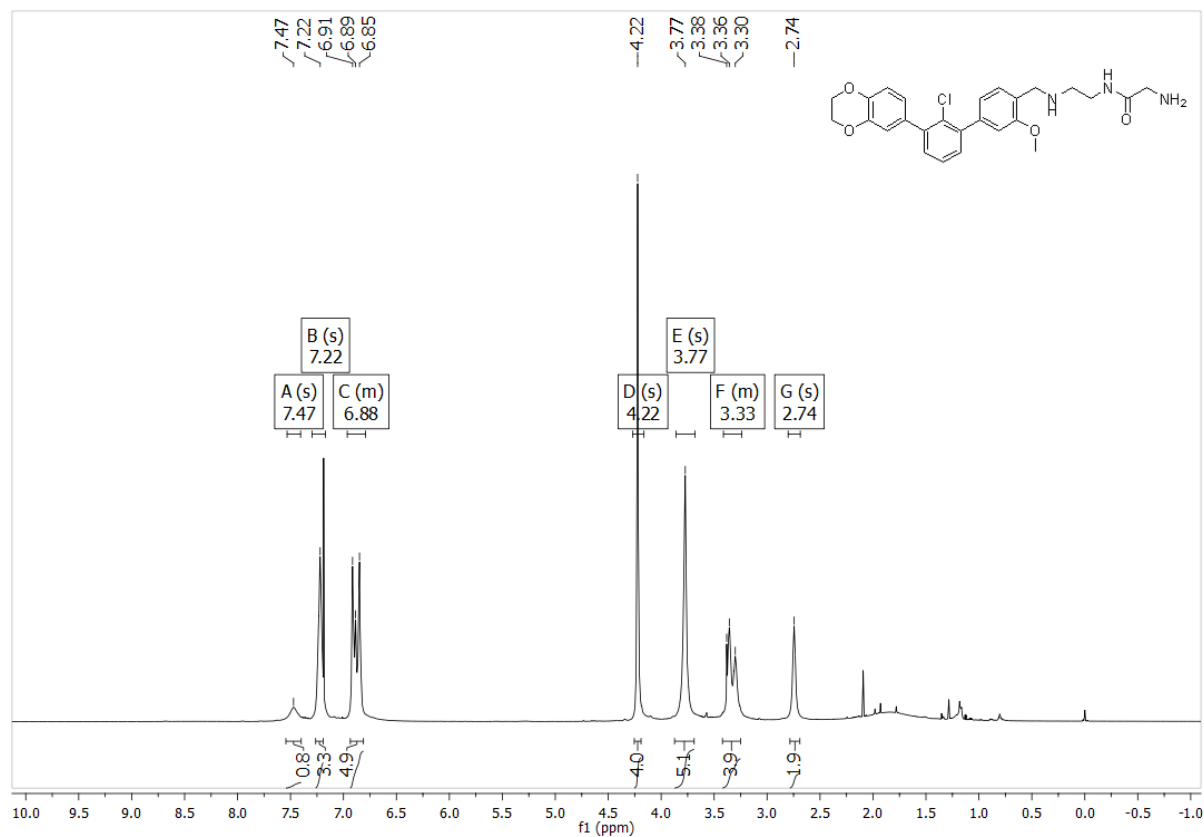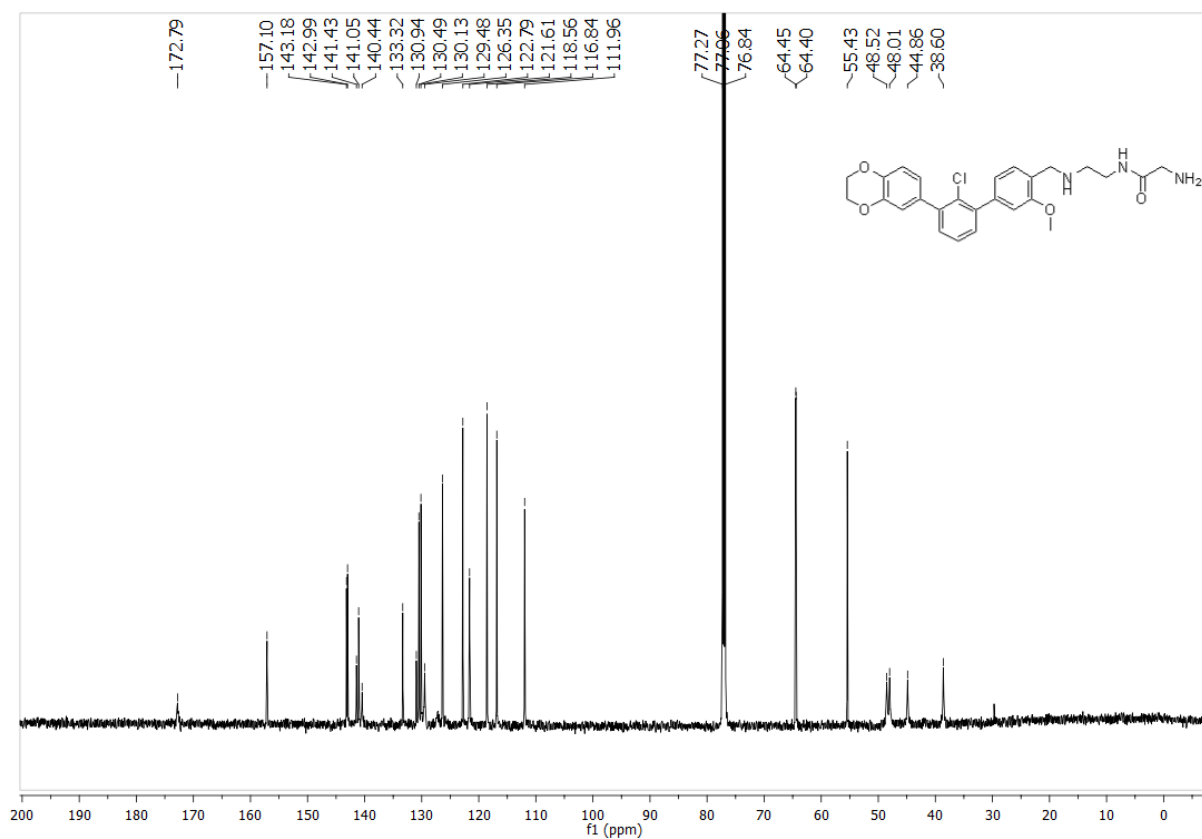

**8g. N-(2-(((2'-chloro-3'-(benzo-1,4-dioxan-6-yl)-3-methoxy-[1,1'-biphenyl]-4-yl)methyl)amino)ethyl)methanesulfonamide**

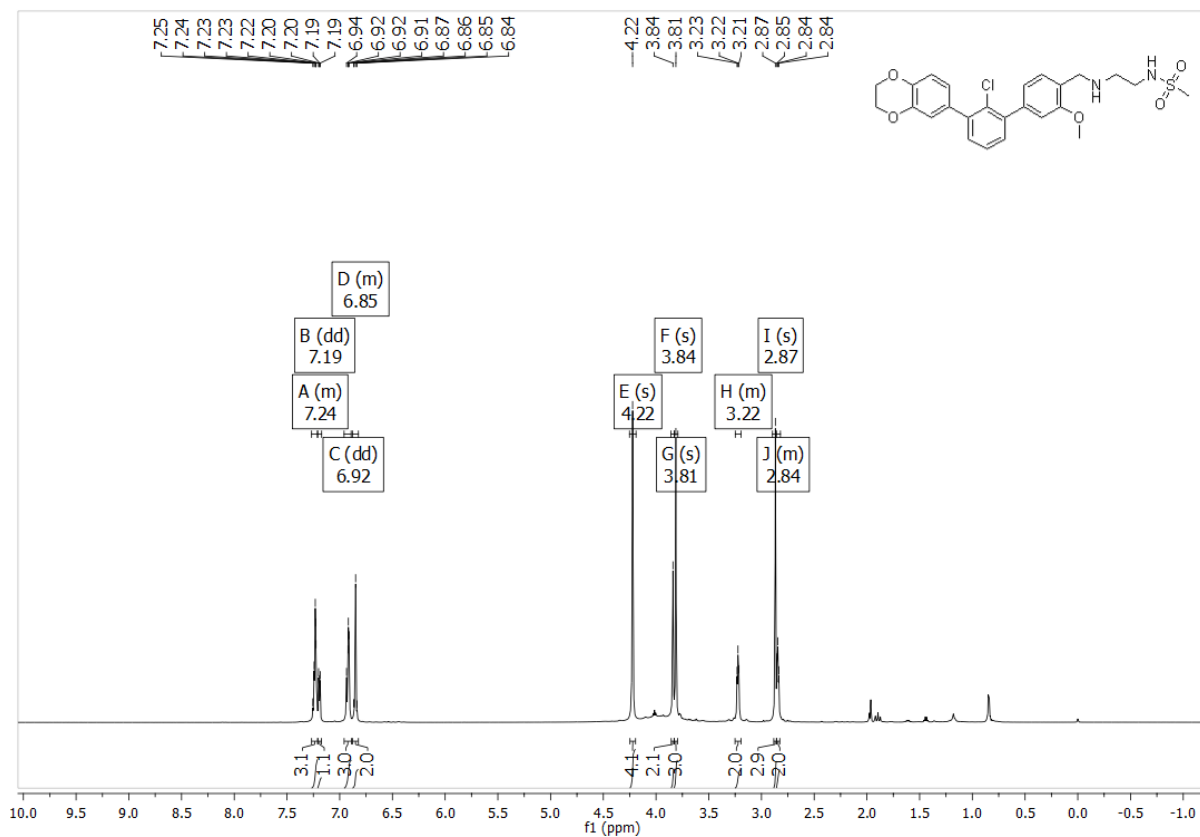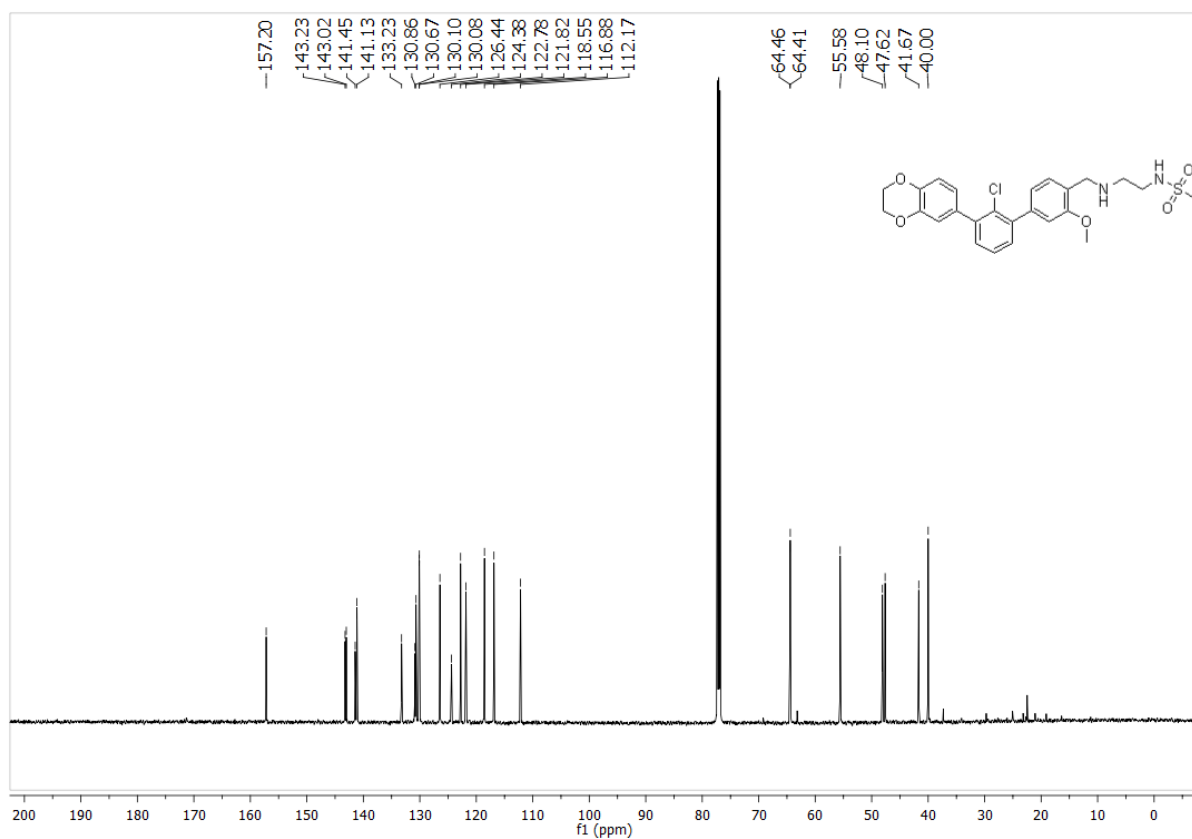

**8h. 1-(2-(((2'-Chloro-3'-(2,3-dihydrobenzo[b][1,4]dioxin-6-yl)-3-methoxy-[1,1'-biphenyl]-4-yl)methyl)amino)ethyl)urea**

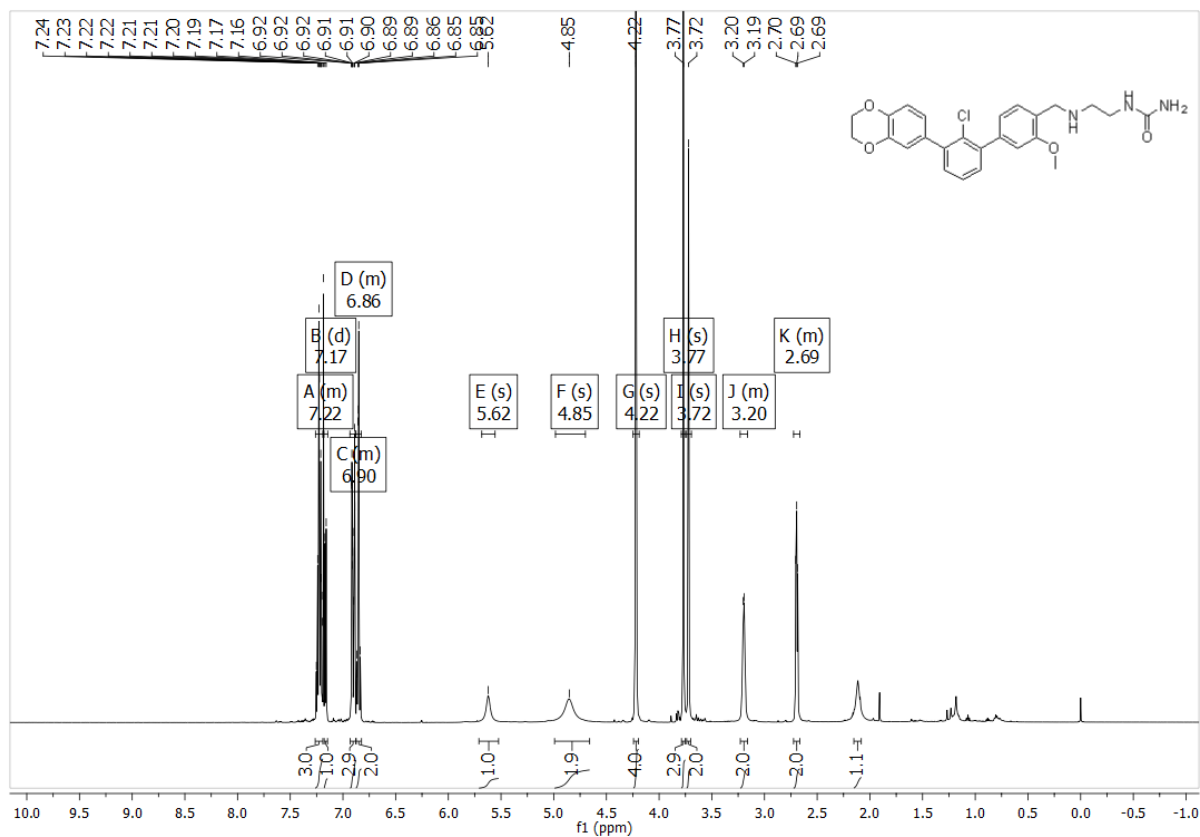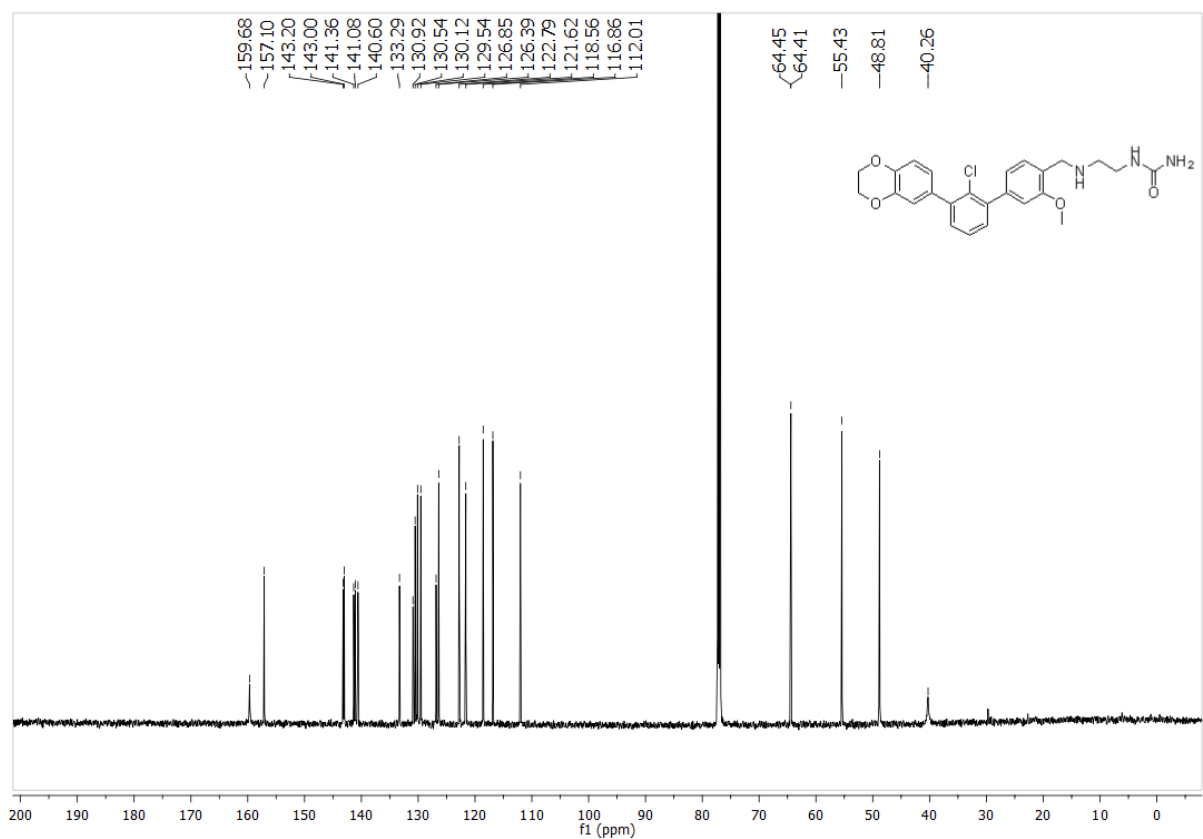

8i. 2-(((2'-chloro-3'-(benzo-1,4-dioxan-6-yl)-3-methoxy-[1,1'-biphenyl]-4-yl)methyl)amino)propane-1,3-diol

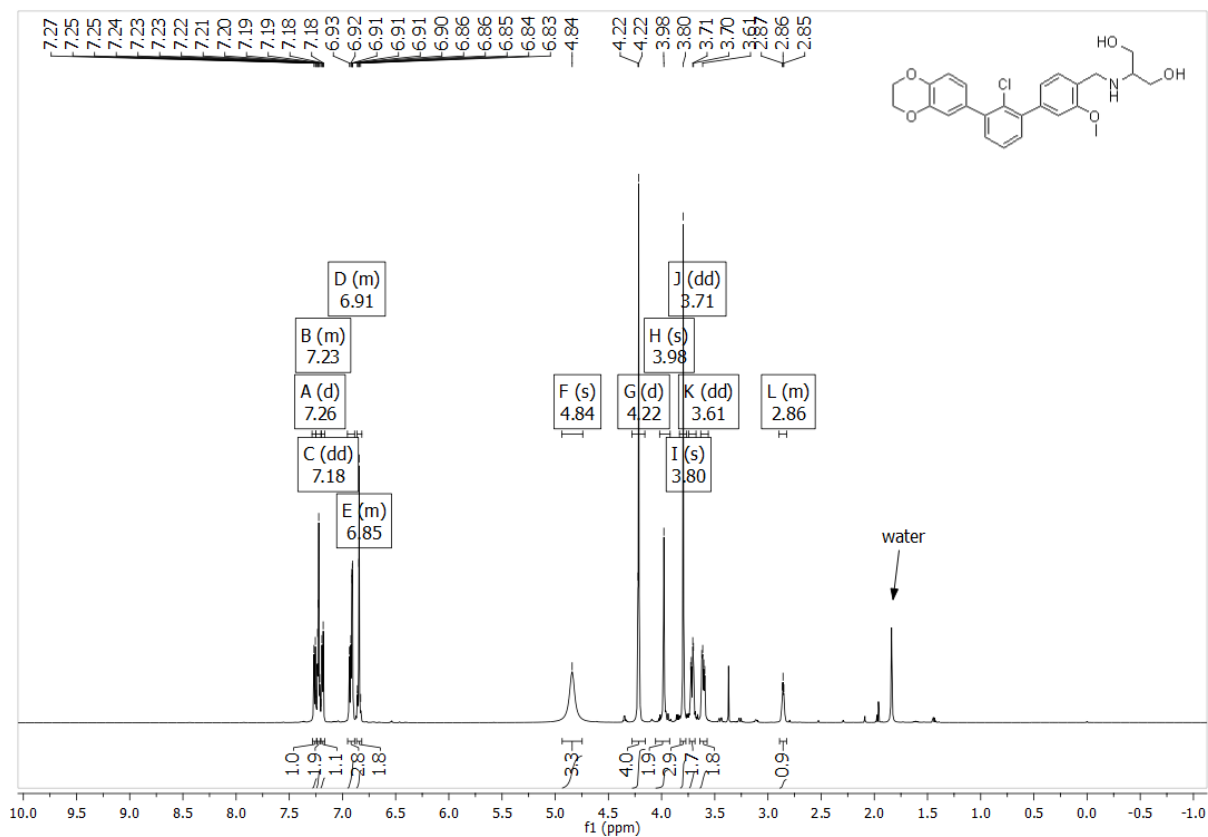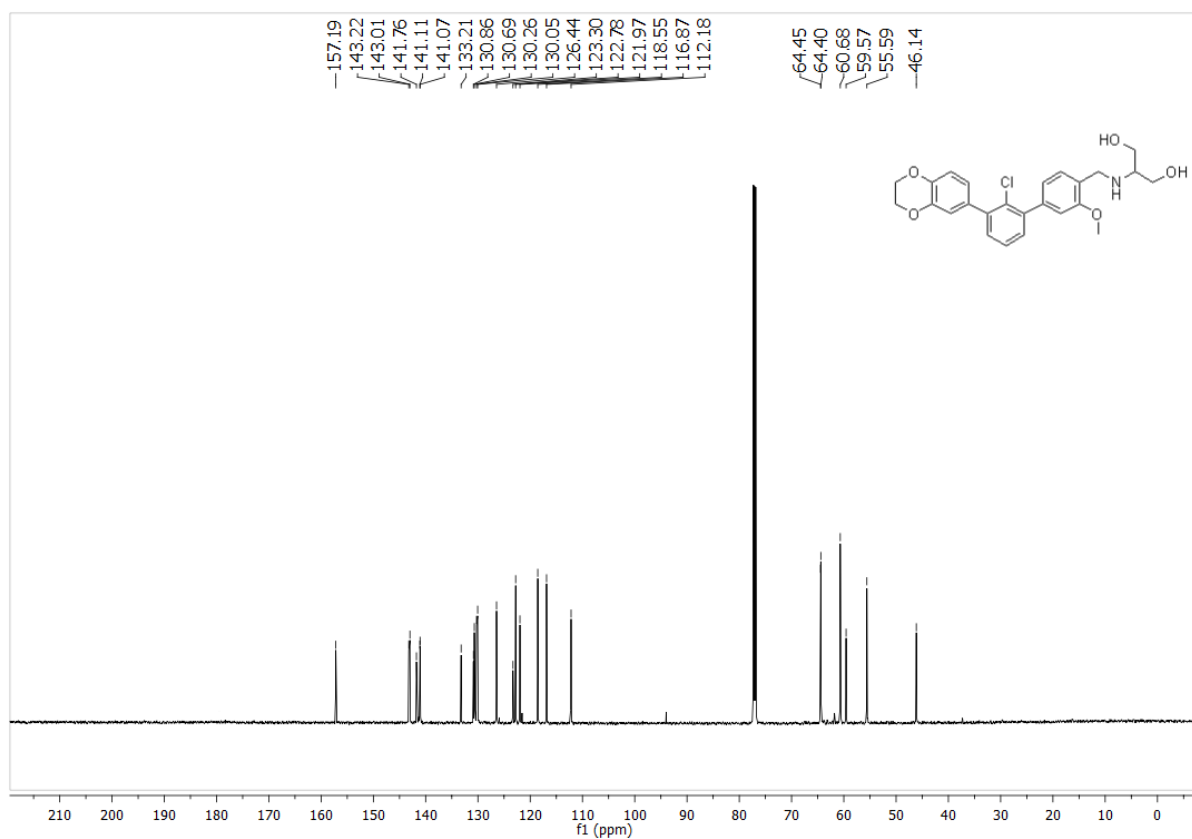

8j. 2-(((2'-chloro-3'-(benzo-1,4-dioxan-6-yl)-3-methoxy-[1,1'-biphenyl]-4-yl)methyl)amino)-2-(hydroxymethyl)propane-1,3-diol

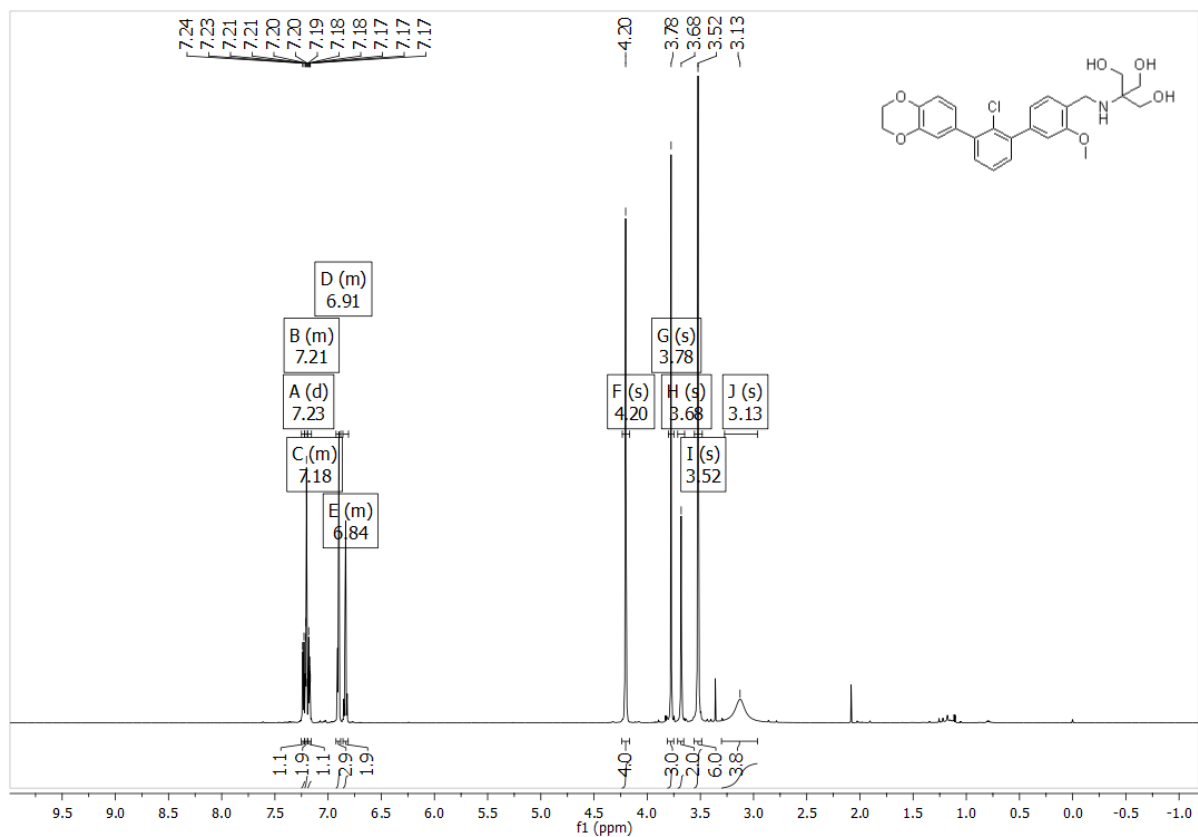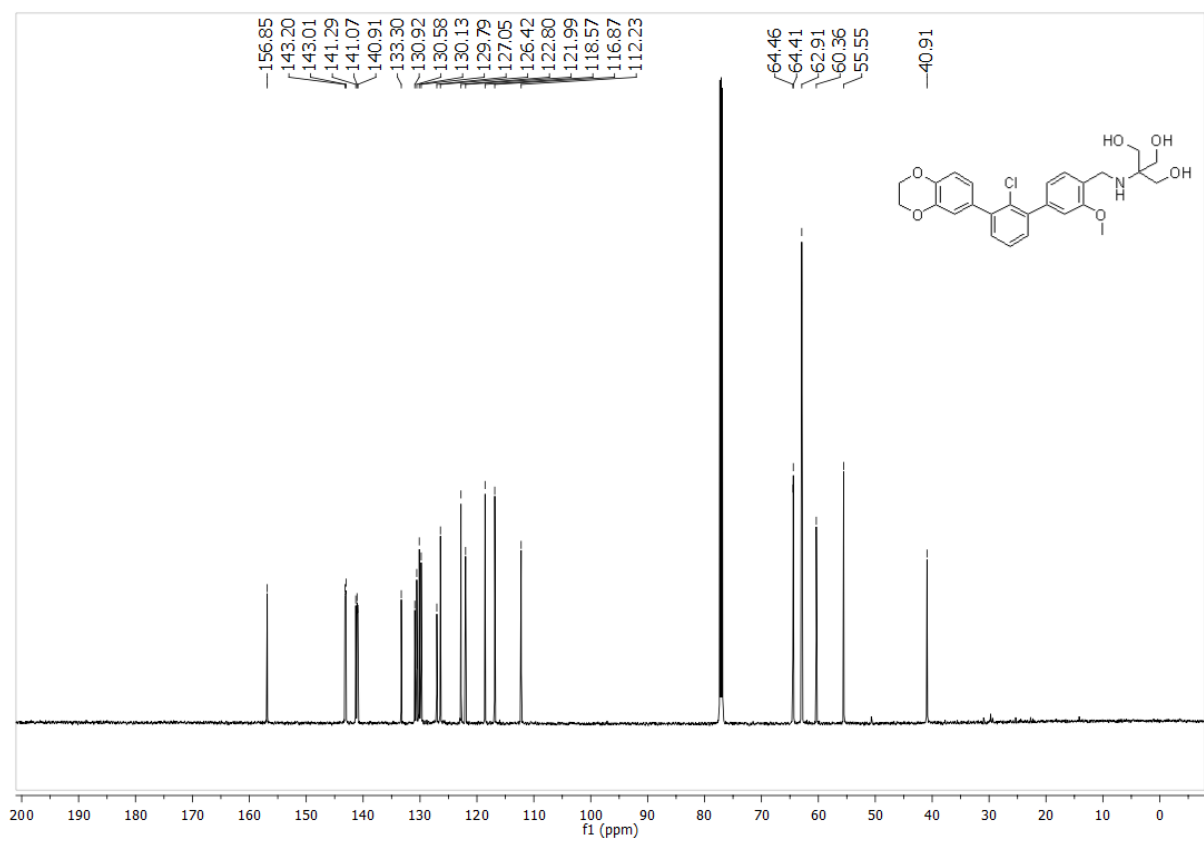

## 4. COPIES OF LCMS OF FINAL COMPOUNDS

### 4a. (3'-(Benzo-1,4-dioxan-6-yl)-2'-methyl-[1,1'-biphenyl]-4-yl)methanol

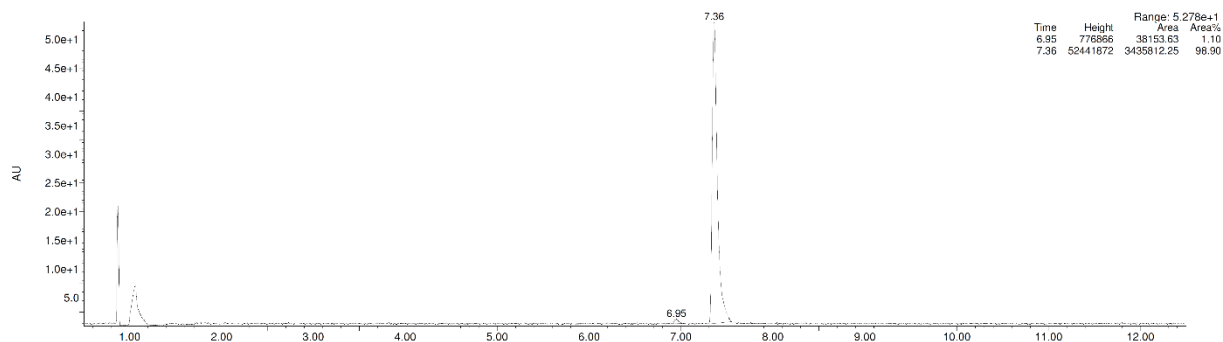

### 4b. (3'-(Benzo-1,4-dioxan-6-yl)-2'-methyl-[1,1'-biphenyl]-3-yl)methanol

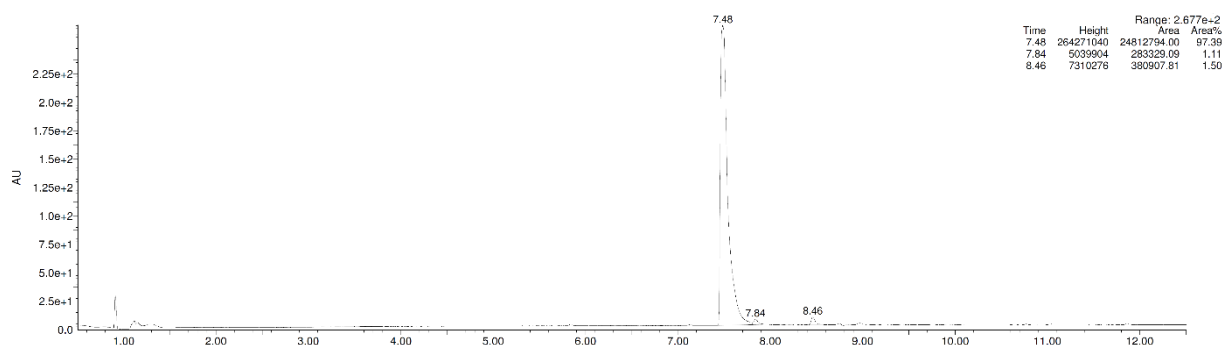

### 4c. (3'-(Benzo-1,4-dioxan-6-yl)-2'-methyl-[1,1'-biphenyl]-2-yl)methanol

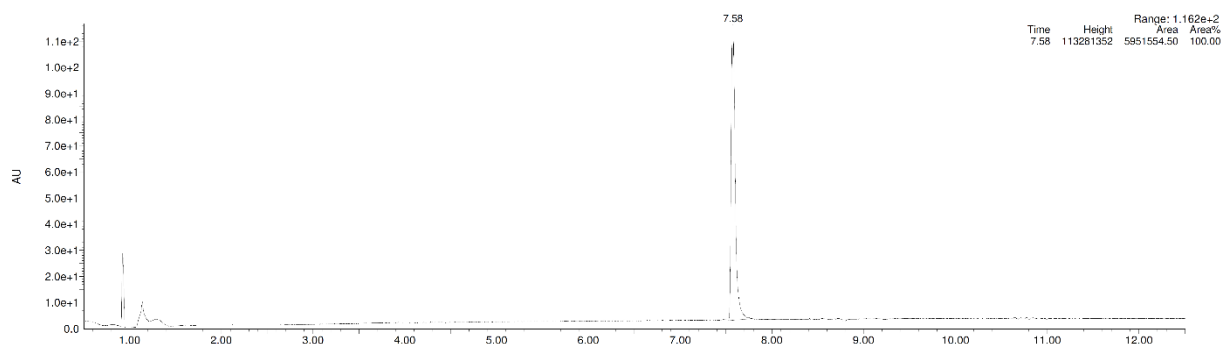

### 4d. (2'-Amino-3'-(benzo-1,4-dioxan-6-yl)-[1,1'-biphenyl]-4-yl)methanol

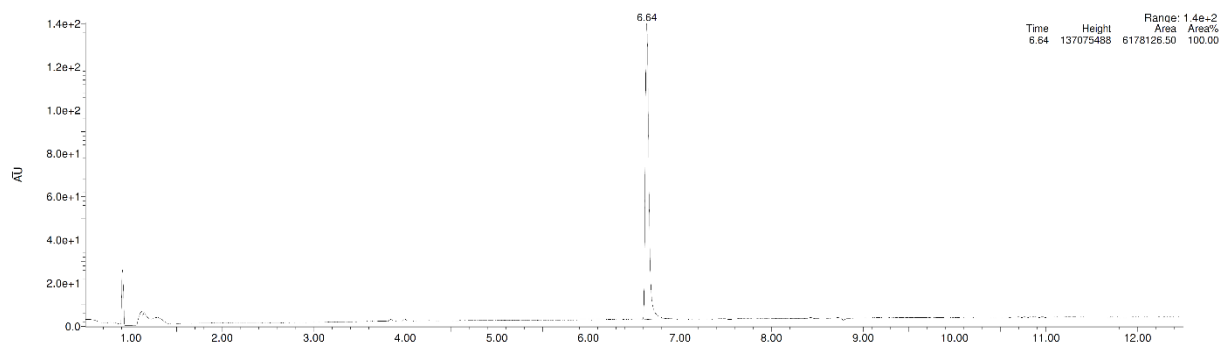



#### 4e. (3'-(Benzo-1,4-dioxan-6-yl)-2'-chloro-[1,1'-biphenyl]-4-yl)methanol

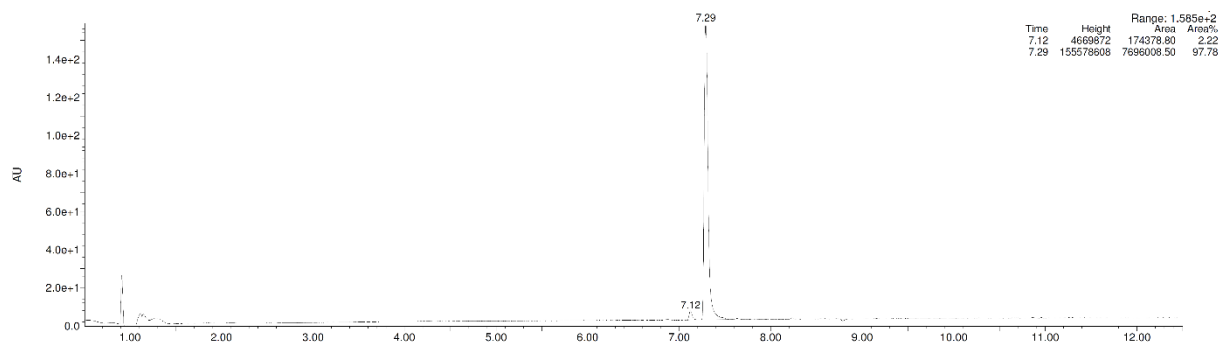

#### 4f. (2'-Bromo-3'-(benzo-1,4-dioxan-6-yl)-[1,1'-biphenyl]-4-yl)methanol

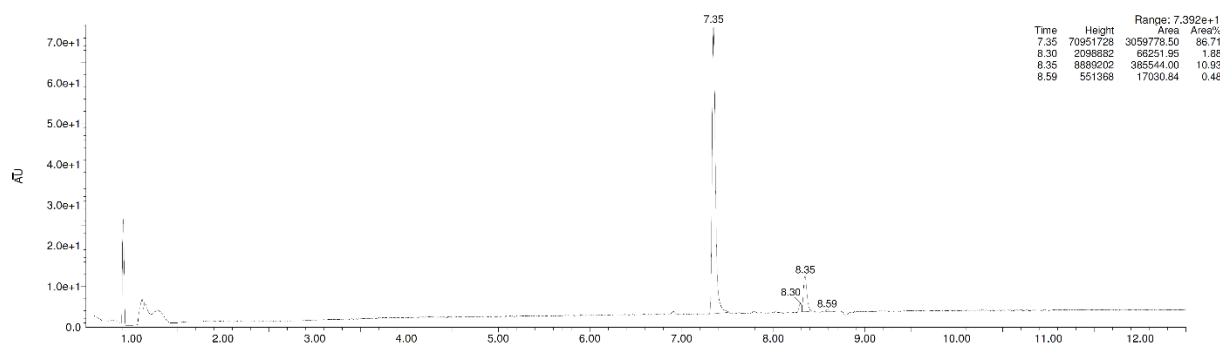

#### 4g. (3'-(Benzo-1,4-dioxan-6-yl)-2'-iodo-[1,1'-biphenyl]-4-yl)methanol

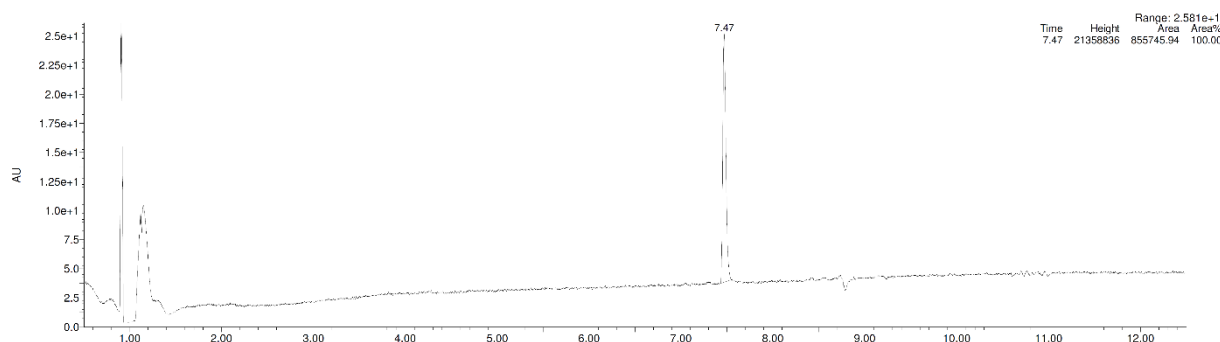

#### 4h. 3-(3'-(Benzo-1,4-dioxan-6-yl)-4'-(hydroxymethyl)-[1,1'-biphenyl]-2-carbonitrile

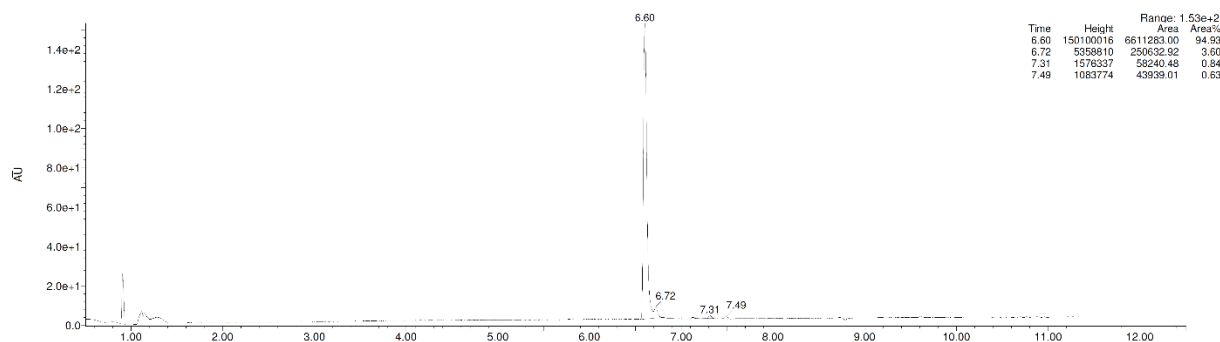

**5b. 3-((3'-(benzo-1,4-dioxan-6-yl)-2'-methyl-[1,1'-biphenyl]-4-yl)methoxy)benzoic acid**

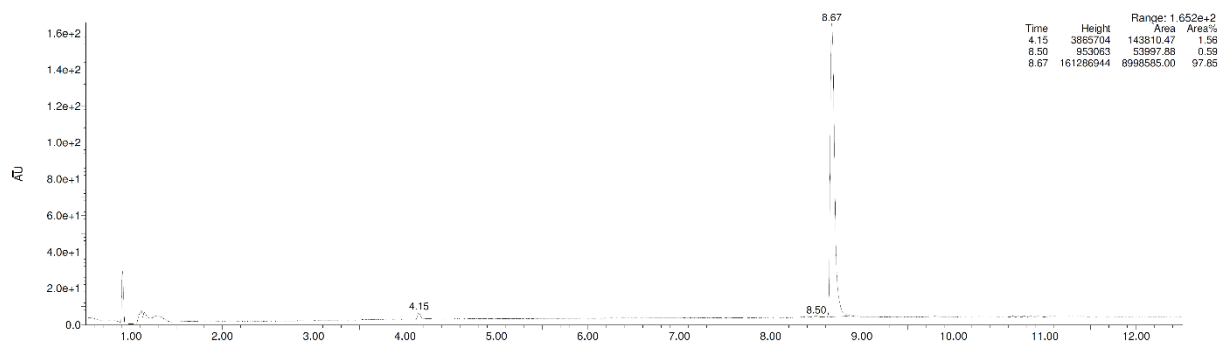

**5d. 5-((3'-(benzo-1,4-dioxan-6-yl)-2'-methyl-[1,1'-biphenyl]-4-yl)methoxy)-2-(pyridin-3-yl)benzaldehyde**

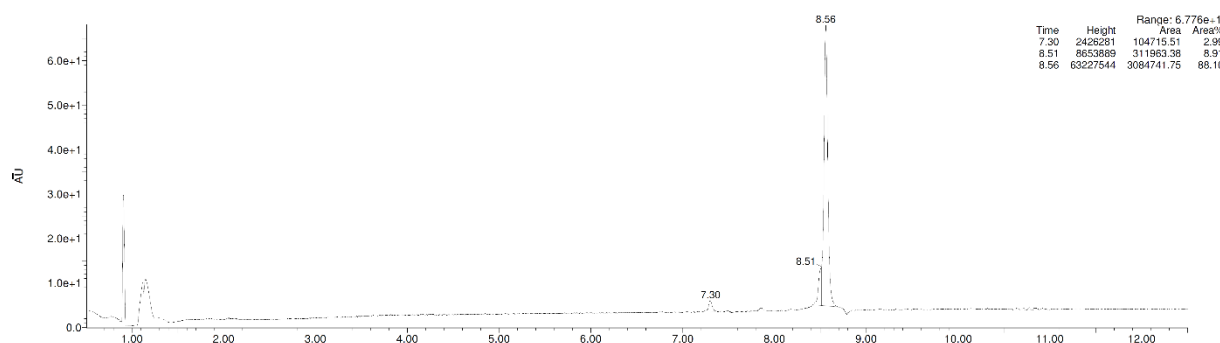

**5f. 3-((3'-(benzo-1,4-dioxan-6-yl)-2'-methyl-[1,1'-biphenyl]-4-yl)methoxy)isoxazole-5-carboxylic acid**

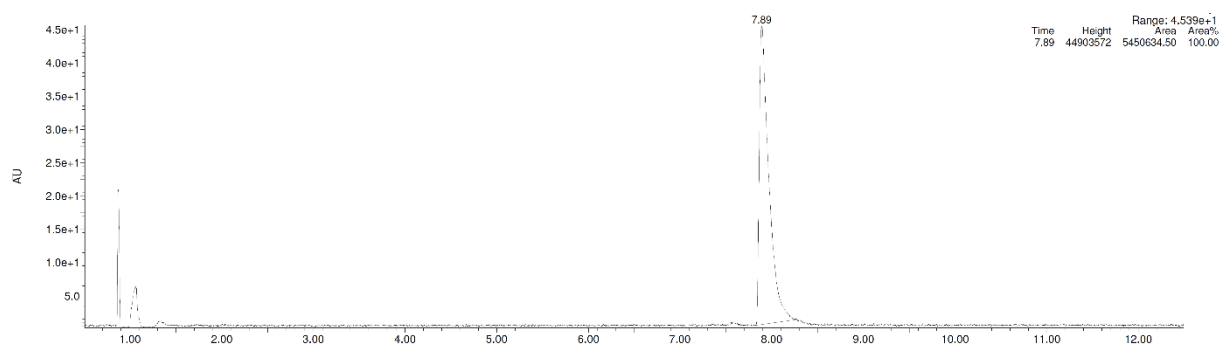

**5h. 1-((3'-(benzo-1,4-dioxan-6-yl)-2'-methyl-[1,1'-biphenyl]-4-yl)methyl)-1H-1,2,3-triazole-4-carboxylic acid**

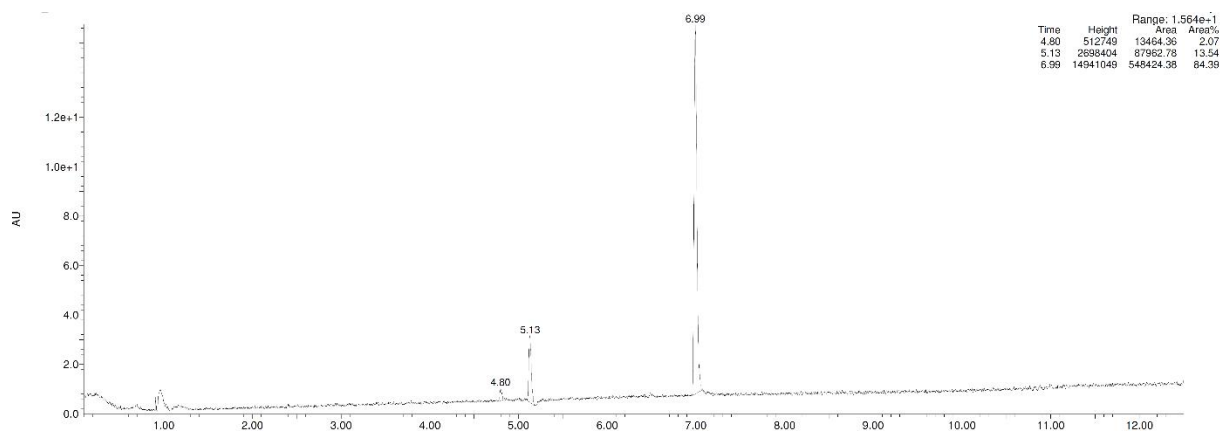

**5j. 3-((3'-(benzo-1,4-dioxan-6-yl)-2'-methyl-[1,1'-biphenyl]-3-yl)methoxy)benzoic acid**

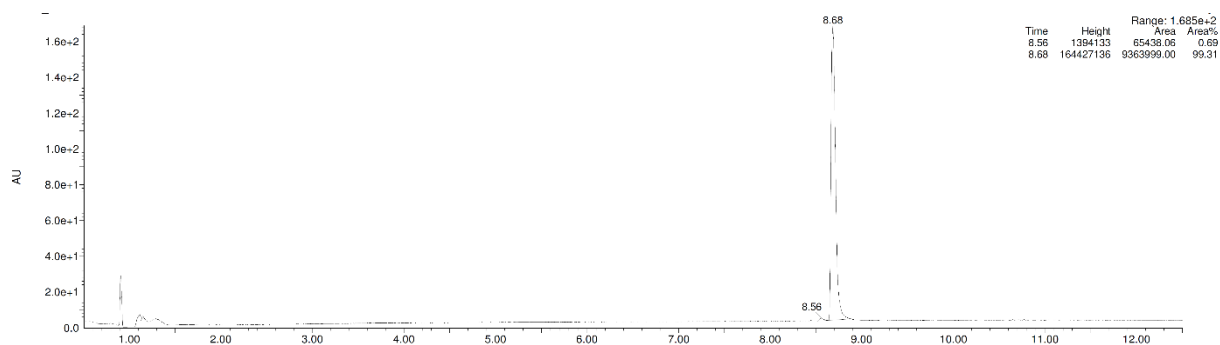

**5l. 5-((3'-(benzo-1,4-dioxan-6-yl)-2'-methyl-[1,1'-biphenyl]-3-yl)methoxy)-2-(pyridin-3-yl)benzaldehyde**

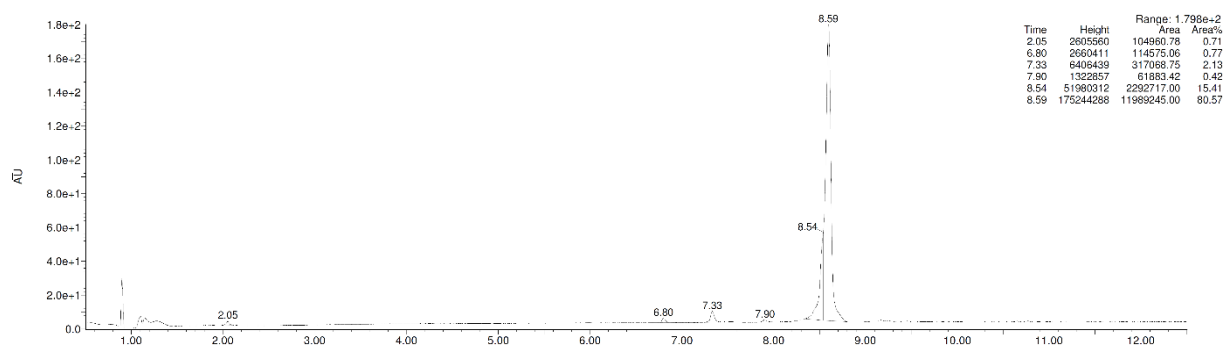

**5n. 3-((3'-(benzo-1,4-dioxan-6-yl)-2'-methyl-[1,1'-biphenyl]-3-yl)methoxy)isoxazole-5-carboxylic acid**

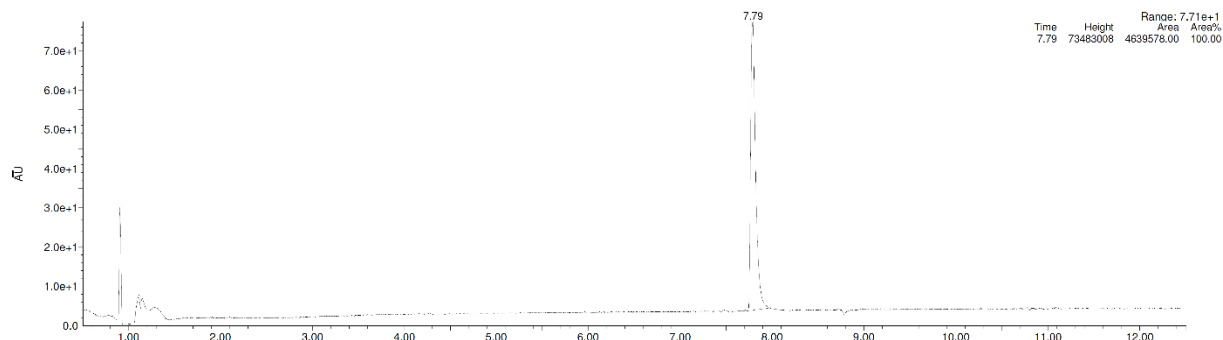

**5p. 3-((3'-(benzo-1,4-dioxan-6-yl)-2'-methyl-[1,1'-biphenyl]-2-yl)methoxy)benzoic acid**

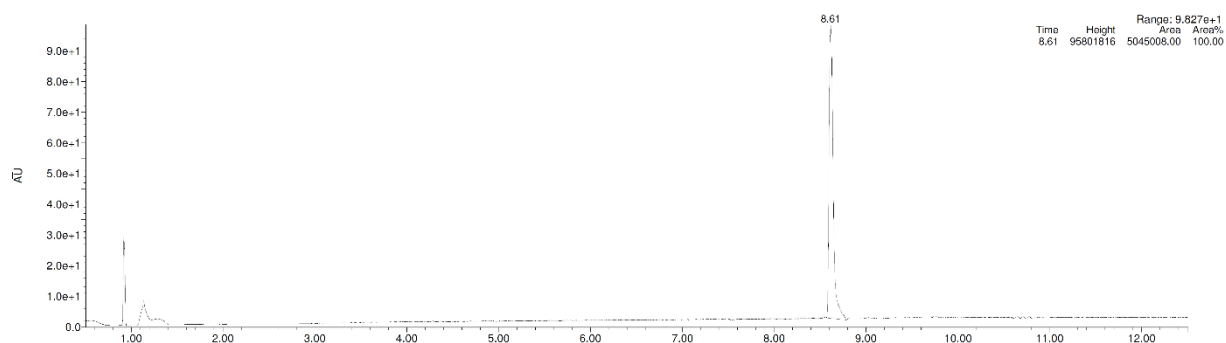

**5r. 3-((3'-(benzo-1,4-dioxan-6-yl)-2'-methyl-[1,1'-biphenyl]-2-yl)methoxy)isoxazole-5-carboxylic acid**

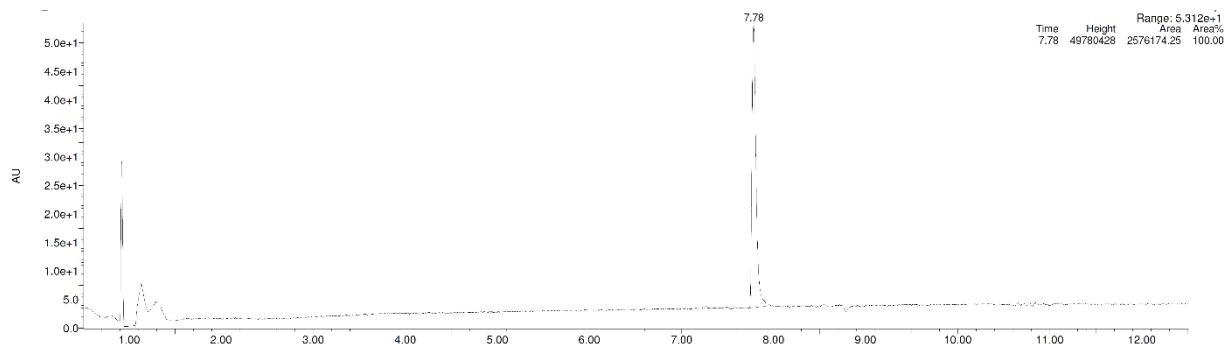

### 6a. 4-((3'-(benzo-1,4-dioxan-6-yl)-2'-methyl-[1,1'-biphenyl]-4-yl)methyl)morpholine

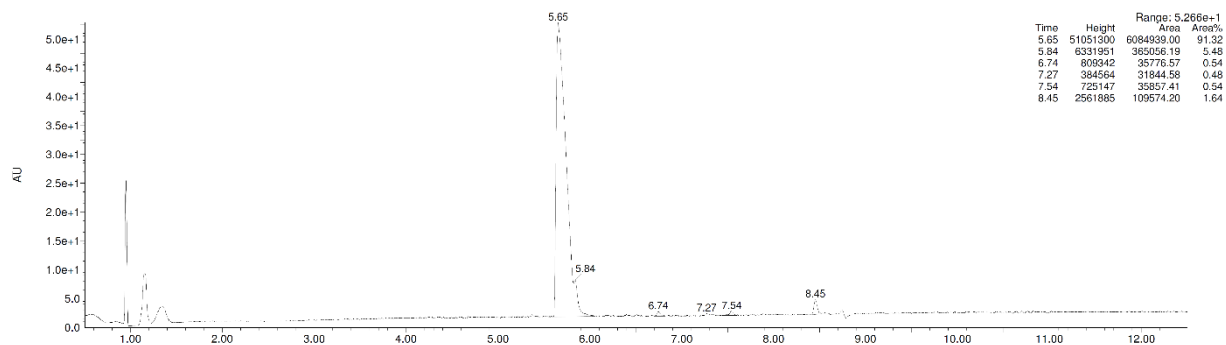

### 6b. 4-((3'-(benzo-1,4-dioxan-6-yl)-2'-methyl-[1,1'-biphenyl]-4-yl)methyl)piperazine

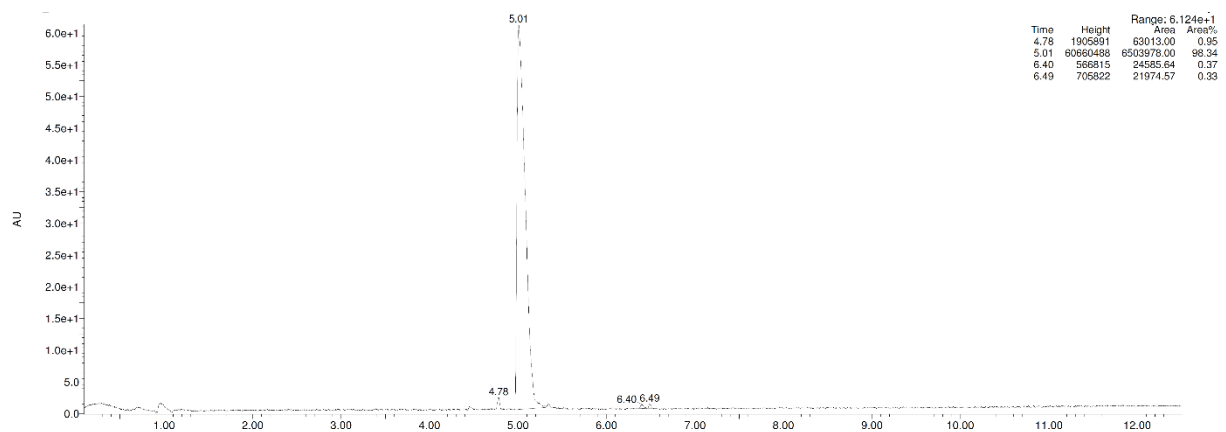

### 6c. 1-((3'-(benzo-1,4-dioxan-6-yl)-2'-methyl-[1,1'-biphenyl]-3-yl)methyl)piperazine

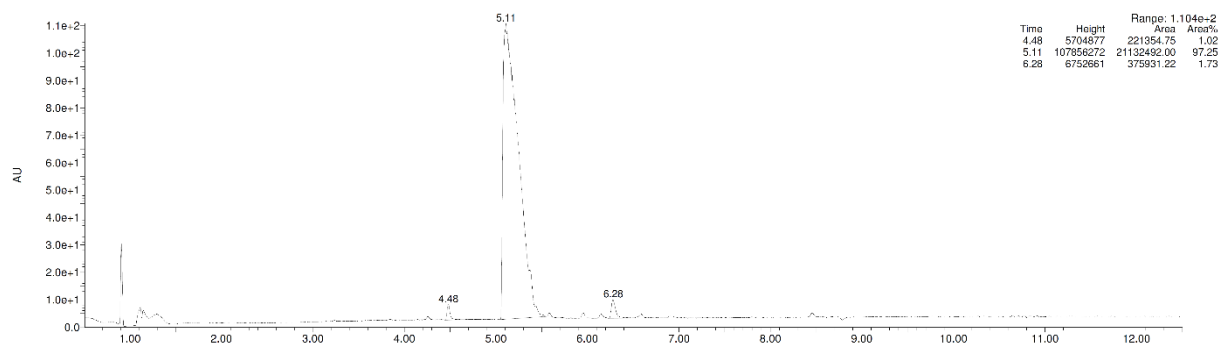

**6d. 1-((3'-(benzo-1,4-dioxan-6-yl)-3-methoxy-2'-methyl-[1,1'-biphenyl]-4-yl)methyl)piperazine**

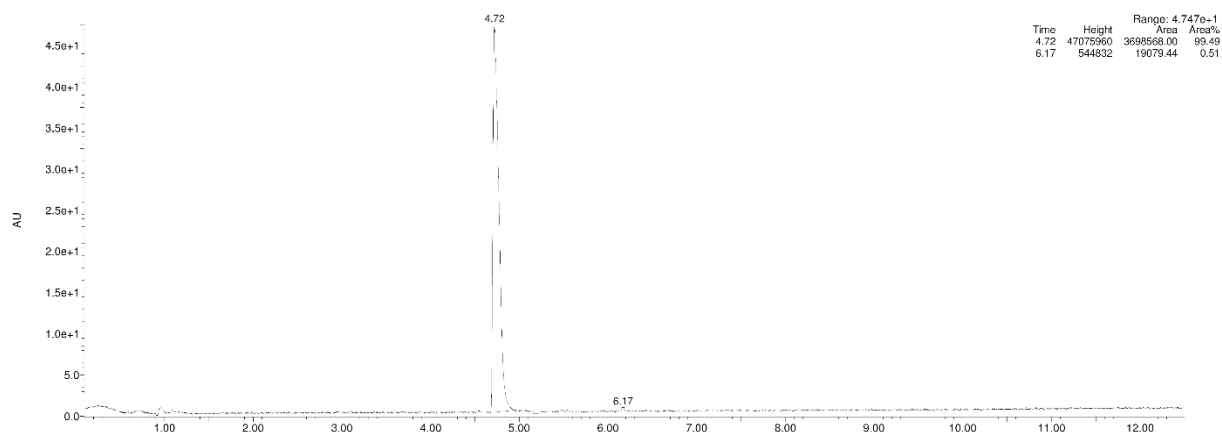

**6e. 3-(((3'-(2,3-benzo-1,4-dioxan-6-yl)-2'-methyl-4-(piperazin-1-ylmethyl)-[1,1'-biphenyl]-3-yl)oxy)methyl)benzonitrile**

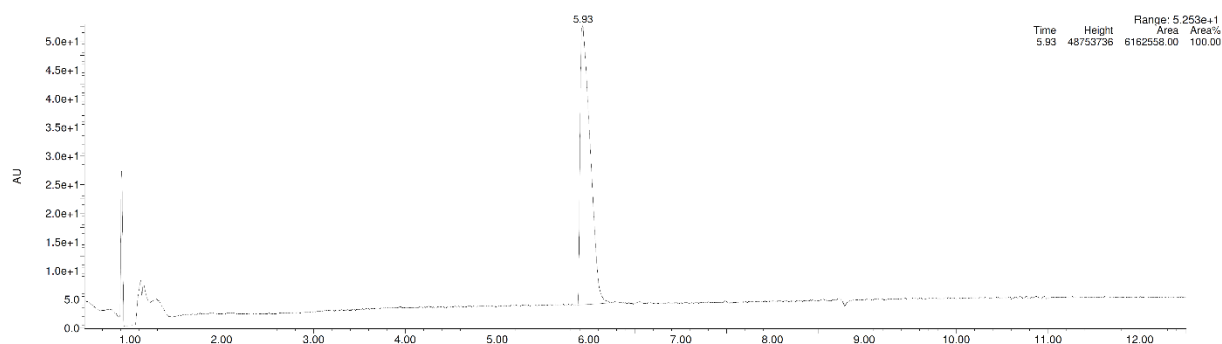

**7a. N-(2-(((2'-chloro-3'-(benzo-1,4-dioxan-6-yl)-3-methoxy-[1,1'-biphenyl]-4-yl)methyl)amino)ethyl)acetamide**

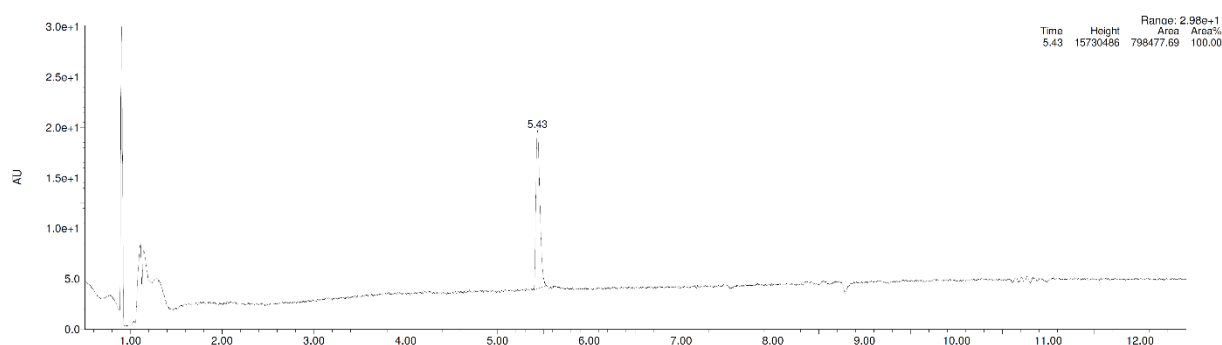

**7b. N-(2-((((benzo-1,4-dioxan-6-yl)-2'-chloro-3'-3-ethoxy-[1,1'-biphenyl]-4-yl)methyl)amino)ethyl)acetamide**

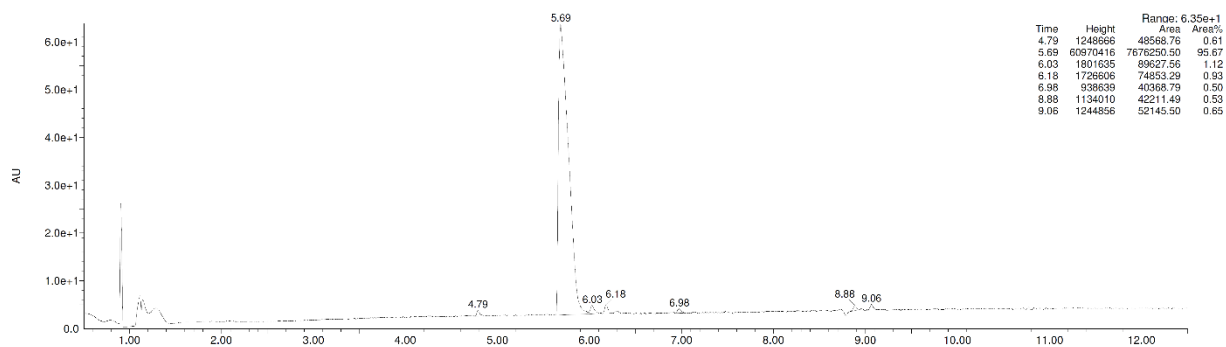

**7c. N-(2-(((2'-chloro-3-((3'-cyano-[1,1'-biphenyl]-3-yl)isopropoxy)-3'-(benzo-1,4-dioxan-6-yl)-[1,1'-biphenyl]-4-yl)methyl)amino)ethyl)acetamide**

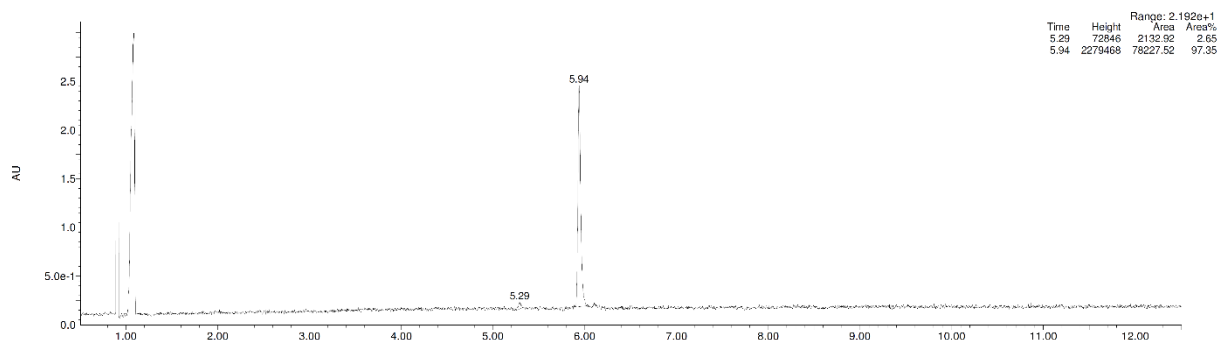

**7d. N-(2-(((2'-chloro-3-((3'-cyano-[1,1'-biphenyl]-3-yl)isopentyloxy)-3'-(benzo-1,4-dioxan-6-yl)-[1,1'-biphenyl]-4-yl)methyl)amino)ethyl)acetamide**

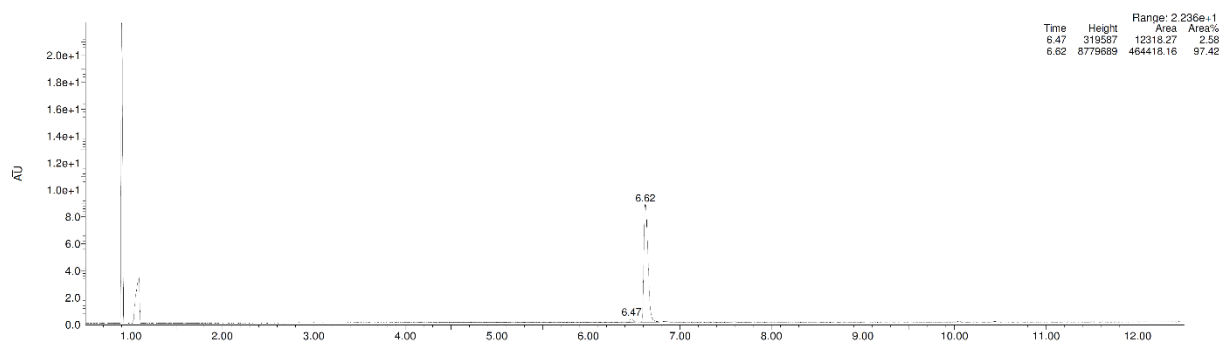

**7e. N-(2-(((3'-(benzo-1,4-dioxan-6-yl)-2'-chloro-3-(cyanomethoxy)-[1,1'-biphenyl]-4-yl)methyl)amino)ethyl)acetamide**

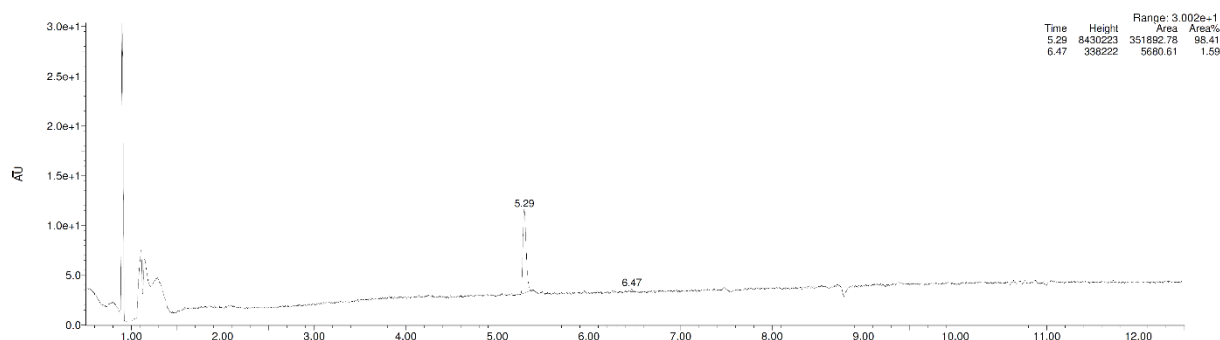

**7f. N-(2-(((3'-(benzo-1,4-dioxan-6-yl)-2'-chloro-3-(cyclobutylmethoxy)-[1,1'-biphenyl]-4-yl)methyl)amino)ethyl)acetamide**

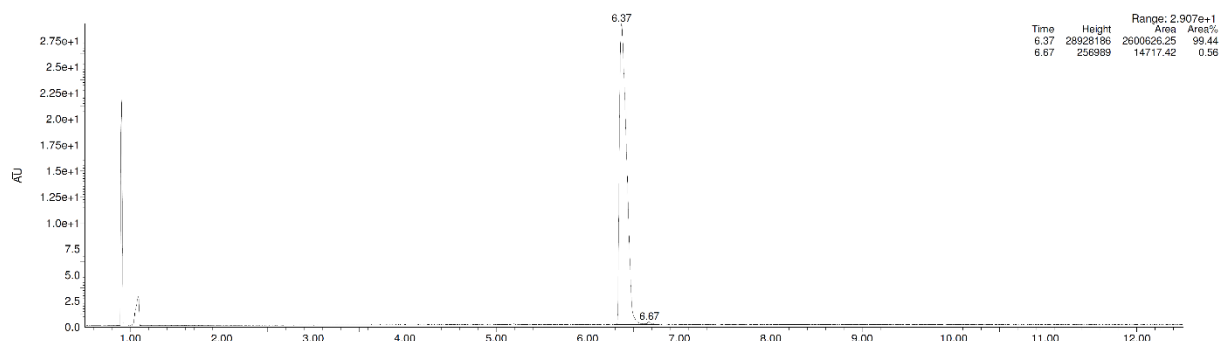

**7g. N-(2-(((3'-(benzo-1,4-dioxan-6-yl)-2'-chloro-3-(cyclopentylmethoxy)-[1,1'-biphenyl]-4-yl)methyl)amino)ethyl)acetamide**

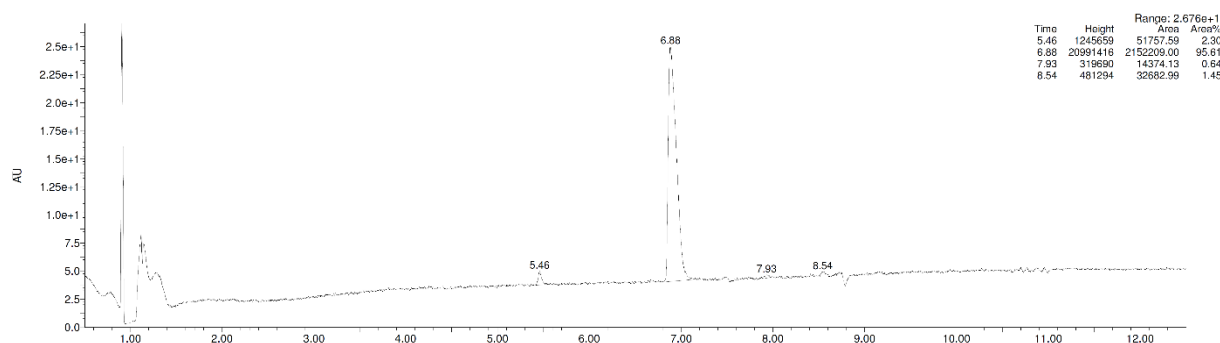

**7h. N-(2-(((3'-(benzo-1,4-dioxan-6-yl)-2'-chloro-3-((3'-cyano-[1,1'-biphenyl]-3-yl)methoxy)-[1,1'-biphenyl]-4-yl)methyl)amino)ethyl)acetamide**

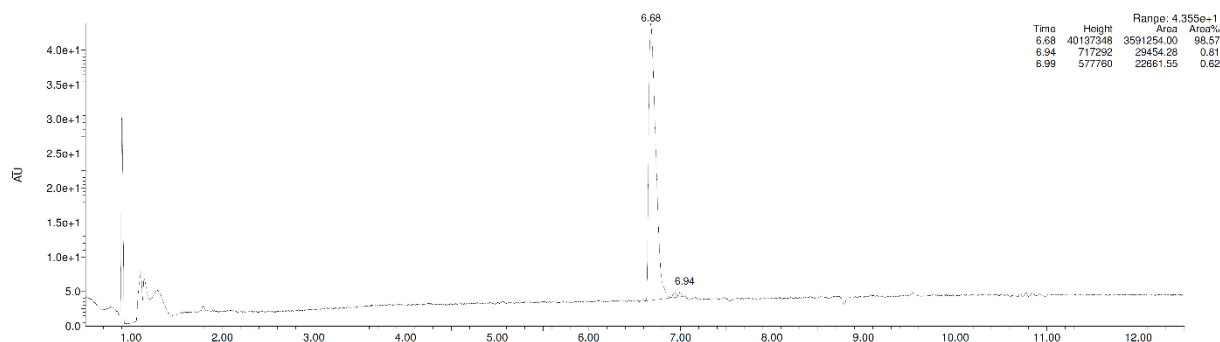



**8a. 1-((2'-chloro-3'-(benzo-1,4-dioxan-6-yl)-3-methoxy-[1,1'-biphenyl]-4-yl)methyl)piperazine**

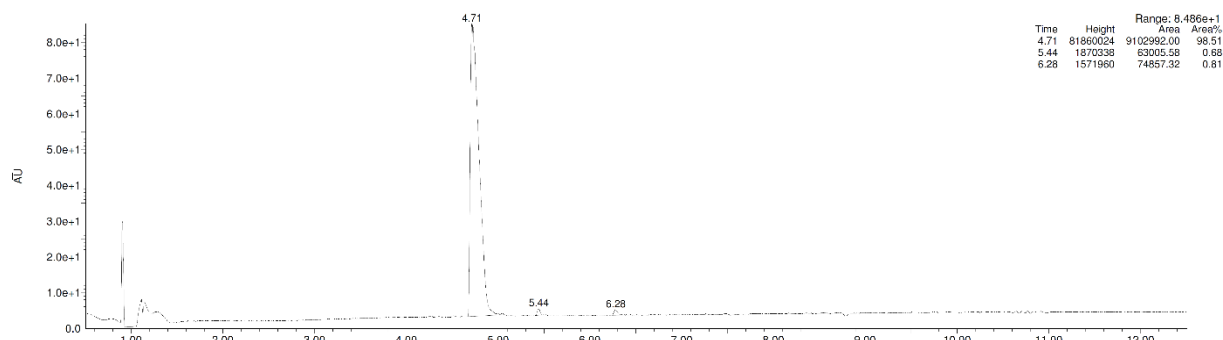

**8b. 4-((2'-chloro-3'-(benzo-1,4-dioxan-6-yl)-3-methoxy-[1,1'-biphenyl]-4-yl)methyl)piperazine-1-carboxamide**

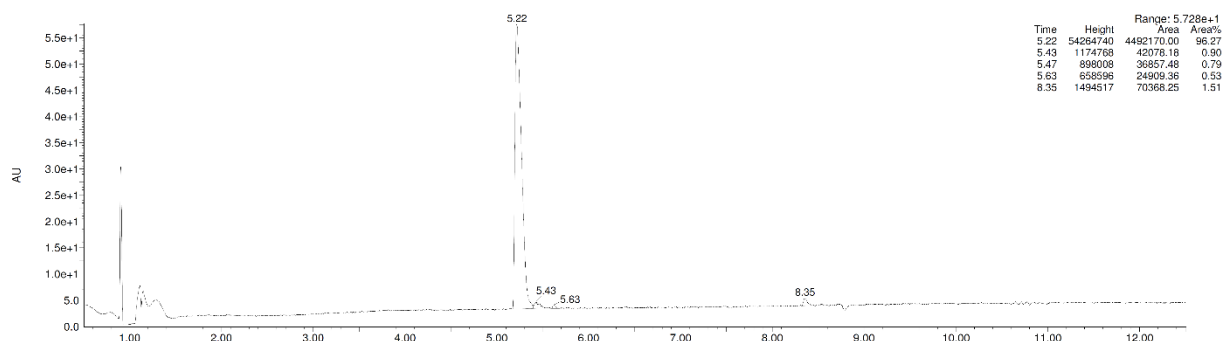

**8c. 1-(4-((2'-Chloro-3'-(benzo-1,4-dioxan-6-yl)-3-methoxy-[1,1'-biphenyl]-4-yl)methyl)piperazin-1-yl)ethan-1-one**

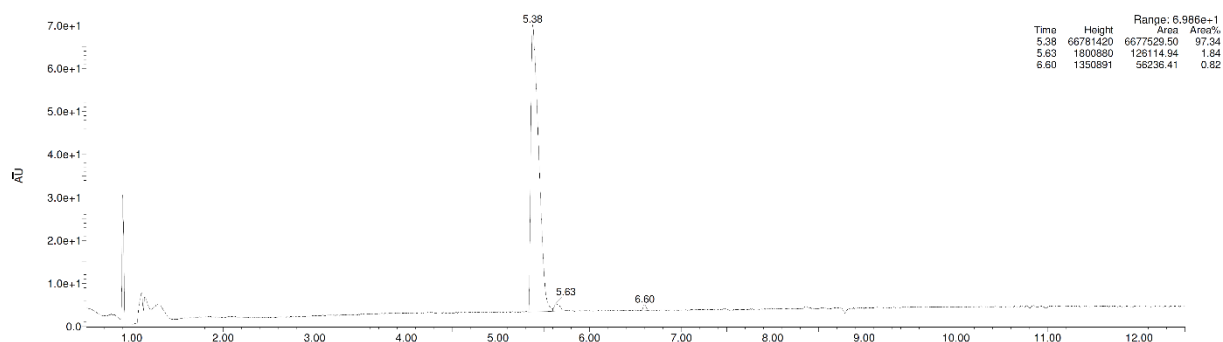

**8d. 2-amino-1-(4-((2'-chloro-3'-(benzo-1,4-dioxan-6-yl)-3-methoxy-[1,1'-biphenyl]-4-yl)methyl)piperazin-1-yl)ethan-1-one**

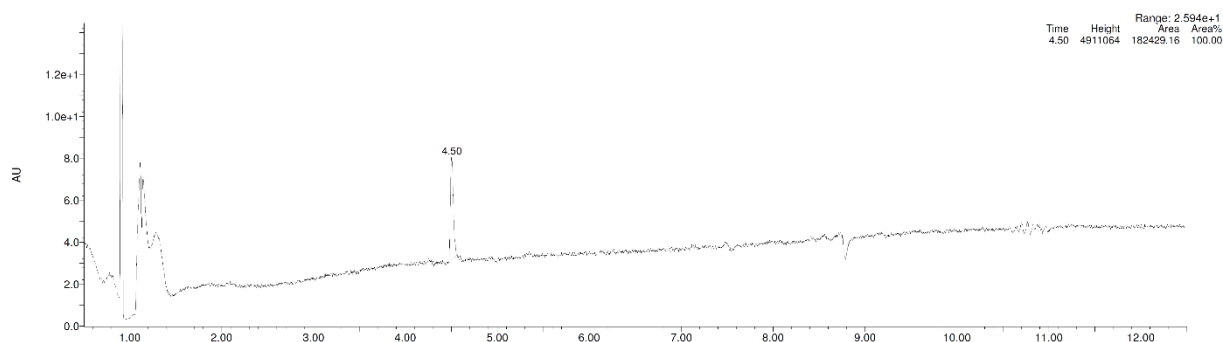

**8e. 1-((2'-chloro-3'-(benzo-1,4-dioxan-6-yl)-3-methoxy-[1,1'-biphenyl]-4-yl)methyl)-4-(methylsulfonyl)piperazine**

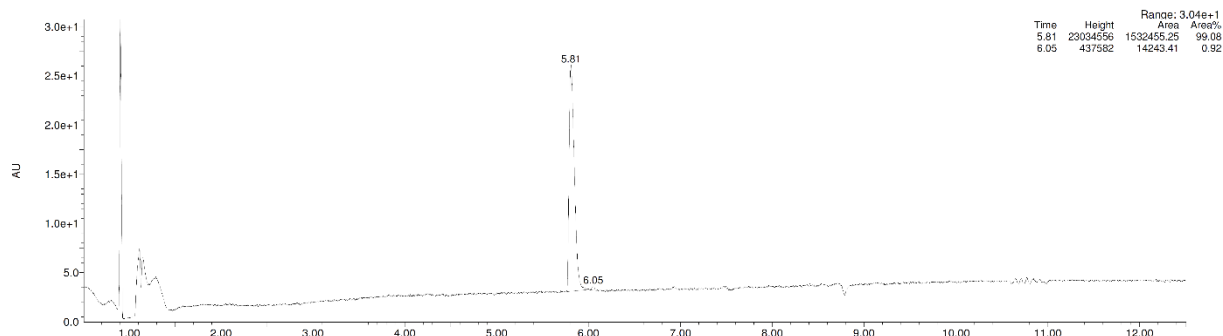

**8f. 2-amino-N-(2-(((benzo-1,4-dioxan-6-yl)-3-methoxy-[1,1'-biphenyl]-4-yl)methyl)amino)ethyl)acetamide**

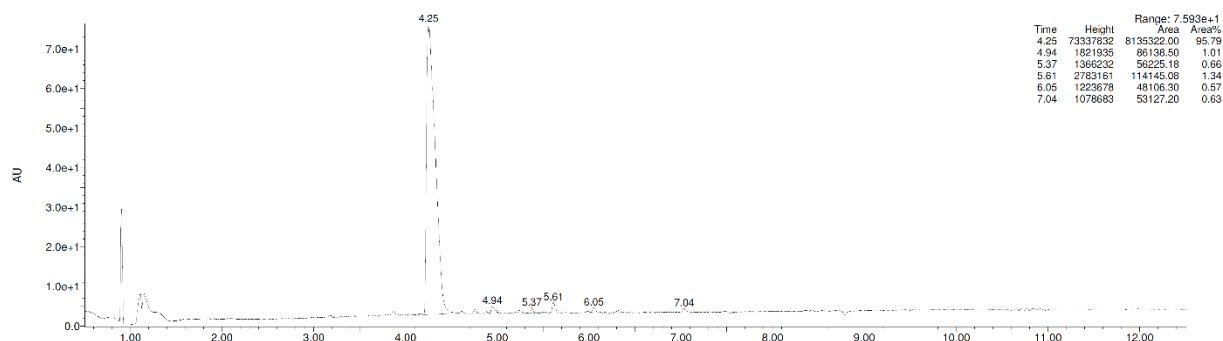

**8g. N-(2-(((2'-chloro-3'-(benzo-1,4-dioxan-6-yl)-3-methoxy-[1,1'-biphenyl]-4-yl)methyl)amino)ethyl)methanesulfonamide**

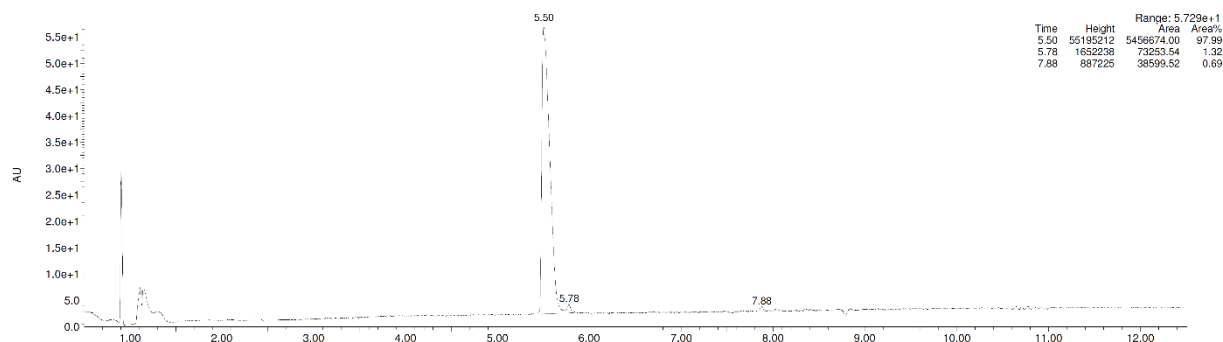

**8h. 1-(2-(((2'-Chloro-3'-(2,3-dihydrobenzo[b][1,4]dioxin-6-yl)-3-methoxy-[1,1'-biphenyl]-4-yl)methyl)amino)ethyl)urea**

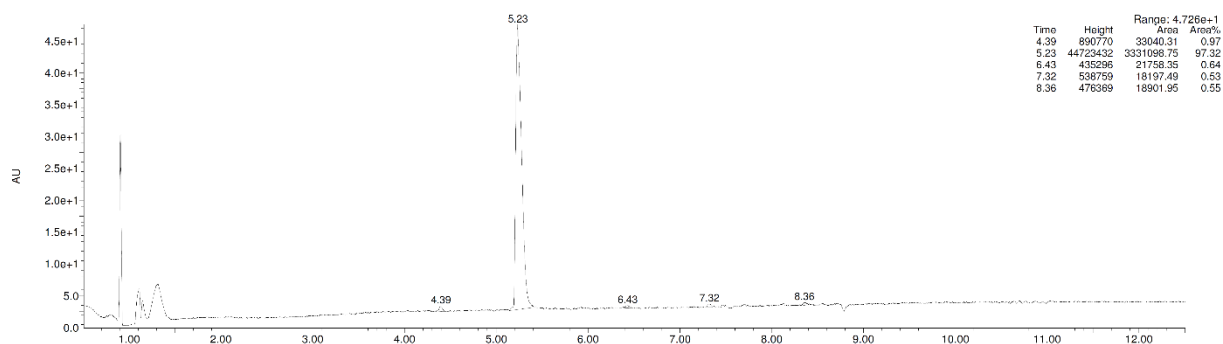

**8i. 2-(((2'-chloro-3'-(benzo-1,4-dioxan-6-yl)-3-methoxy-[1,1'-biphenyl]-4-yl)methyl)amino)propane-1,3-diol**

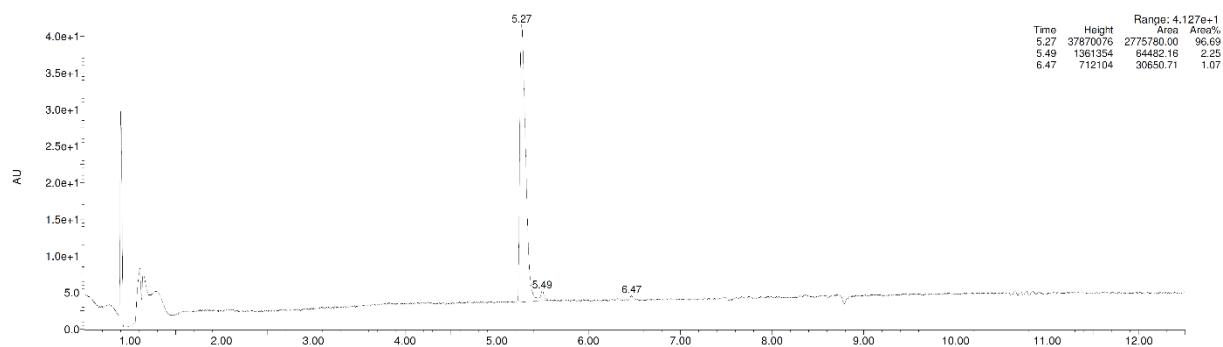

**8j. 2-(((2'-chloro-3'-(benzo-1,4-dioxan-6-yl)-3-methoxy-[1,1'-biphenyl]-4-yl)methyl)amino)-2-(hydroxymethyl)propane-1,3-diol**

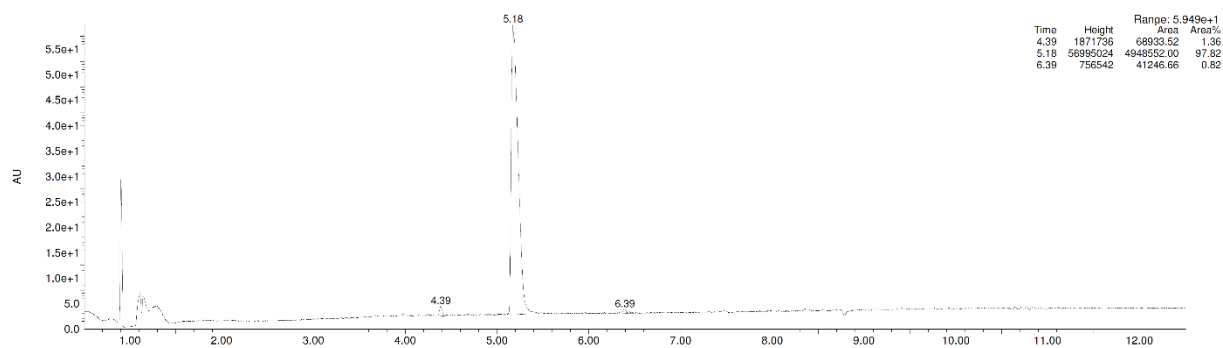

---

## 6. REFERENCES

- (1) Bacon, E.; Dandu, R.; Guise-Zawacki, L.; Huang, C.-Y.; Hudkins, R.; Tao, M. Substituted Spirocyclic Piperidine Derivatives as Histamine-3 (H3) Receptor Ligands, WO2009097567A1, Cephalon INC. and Pharmacoepia INC., 2009.
- (2) Dowdell, S. E.; Eidam, H. S.; Elban, M.; Fos, R. M.; Hammond, M.; Hilfiker, M. A.; Hoang, T. H.; Kallander, L. S.; Lawhorn, B. G.; Manns, S.; Philip, J.; Washburn, D. G.; Ye, G. Hydroxyformamide Derivatives and Their Use, WO2015104684A1, GlaxoSimthKline IP, 2015.
- (3) McQuaid, K. M.; Long, J. Z.; Sames, D. C-H Bond Functionalization via Hydride Transfer: Synthesis of Dihydrobenzopyrans from Ortho-Vinylaryl Alkyl Ethers. *Org. Lett.* **2009**, *11* (14), 2972–2975. <https://doi.org/10.1021/ol900915p>.
- (4) Robbins, J. S.; Schmid, K. M.; Phillips, S. T. Effects of Electronics, Aromaticity, and Solvent Polarity on the Rate of Azaquinone-Methide-Mediated Depolymerization of Aromatic Carbamate Oligomers. *J. Org. Chem.* **2013**, *78* (7), 3159–3169. <https://doi.org/10.1021/jo400105m>.
- (5) Corminboeuf, O.; Fretz, H.; Lyothier, I.; Pothier, J.; Pozzi, D.; Richard-Bildstein, S.; Sifferlen, T.; Wyder Peters, L. N-Substituted Indole Derivatives as PGE2 Receptor Modulators, WO2017085198A1, Actelion Pharmaceuticals LTD, 2017.
